# Supplementary material for: SLCO1B1 Exome Sequencing and Statin Treatment Response in 64,000 UK Biobank Patients
Source: Int J Mol Sci. 2024 Apr 17;25(8):4426. doi: 10.3390/ijms25084426 (PMC11050003; doi:10.3390/ijms25084426)
Supplement: Supplementary file 1 [file ijms-25-04426-s001.zip › Supplementary Tables.SLCO1B1_exomes_2024.04.17.xlsx]

## Sheet: Table S1
	Table S1- Associations of baseline biomarkers and SLCO1B1 common variants
	outcome	exposure	Coef	0.95	CI	p.value	n		Abbreviations: ALT, Alanine aminotransferase; CRP, C-reactive protein
	alt	SLCO1B1*5-0	ref				44889		0	wild type
	alt	SLCO1B1*5-1	0.00649297	-0.249647	0.262633	0.960375	15664		1	heterozytgotes (only avaliable for 4 common variants, not haplotypes)
	alt	SLCO1B1*5-2	1.17451	0.421652	1.92737	0.00223155	1385		2	homozygotes for common variants, and carriers of haplotypes
	alt	SLCO1B1*14-0	ref				23905
	alt	SLCO1B1*14-2	-0.0654136	-0.357894	0.227066	0.661136	14212		Biormarker:	Units:
	alt	SLCO1B1*15-0	ref				22045		ALT	U/L
	alt	SLCO1B1*15-2	0.133261	-0.161964	0.428486	0.376323	14477		Direct bilirubin	umol/L
	alt	SLCO1B1*20-0	ref				24287		cholesterol	mmol/L
	alt	SLCO1B1*20-2	-0.111068	-0.511997	0.289861	0.587161	6179		crp	mg/L.
	alt	SLCO1B1*37-0	ref				24447		cystatin c	mg/L
	alt	SLCO1B1*37-1	-0.0132015	-0.256489	0.230086	0.915302	27386		hba1c	mmol/mol.
	alt	SLCO1B1*37-2	0.207201	-0.130402	0.544804	0.229015	9248		ldl	mmol/L
	alt	SLCO1B1*45-0	ref				60943		triglycerides	mmol/L
	alt	SLCO1B1*45-1	0.584224	-2.78194	3.95039	0.733732	67		vitamin d	nmol/L
	alt	SLCO1B1*46-0	ref				21736
	alt	SLCO1B1*46-2	0.0230782	-0.211292	0.257449	0.846963	38324
	alt	SLCO1B1*4-0	ref				45861
	alt	SLCO1B1*4-1	-0.0899092	-0.361474	0.181655	0.516404	13354
	alt	SLCO1B1*4-2	-0.55574	-1.28597	0.174487	0.135801	1476
	alt	SLCO1B1*19-0	ref				55554
	alt	SLCO1B1*19-1	-0.175309	-0.543968	0.19335	0.351328	6232
	alt	SLCO1B1*19-2	0.0703972	-2.15647	2.29726	0.950595	154
	direct bilirubin	SLCO1B1*5-0	ref				44727
	direct bilirubin	SLCO1B1*5-1	0.640271	0.560965	0.719578	2.76402e-56	15616
	direct bilirubin	SLCO1B1*5-2	1.83906	1.60623	2.07188	5.82244e-54	1384
	direct bilirubin	SLCO1B1*14-0	ref				23814
	direct bilirubin	SLCO1B1*14-2	-0.186095	-0.274901	-0.0972881	4.01466e-05	14159
	direct bilirubin	SLCO1B1*15-0	ref				21963
	direct bilirubin	SLCO1B1*15-2	0.669614	0.576989	0.76224	1.88079e-45	14438
	direct bilirubin	SLCO1B1*20-0	ref				24195
	direct bilirubin	SLCO1B1*20-2	-0.283374	-0.403318	-0.163429	3.66313e-06	6159
	direct bilirubin	SLCO1B1*37-0	ref				24355
	direct bilirubin	SLCO1B1*37-1	0.0928869	0.0173415	0.168432	0.0159609	27295
	direct bilirubin	SLCO1B1*37-2	0.162404	0.0575899	0.267219	0.0023916	9220
	direct bilirubin	SLCO1B1*45-0	ref				60736
	direct bilirubin	SLCO1B1*45-1	2.38777	1.33386	3.44169	8.98916e-06	66
	direct bilirubin	SLCO1B1*46-0	ref				21654
	direct bilirubin	SLCO1B1*46-2	0.21572	0.142828	0.288611	6.64794e-09	38198
	direct bilirubin	SLCO1B1*4-0	ref				45708
	direct bilirubin	SLCO1B1*4-1	-0.310815	-0.395134	-0.226495	5.07959e-13	13305
	direct bilirubin	SLCO1B1*4-2	-0.558322	-0.785031	-0.331613	1.39049e-06	1471
	direct bilirubin	SLCO1B1*19-0	ref				55363
	direct bilirubin	SLCO1B1*19-1	-0.365861	-0.480353	-0.25137	3.79819e-10	6212
	direct bilirubin	SLCO1B1*19-2	-0.998918	-1.68938	-0.30845	0.00457642	154
	cholesterol	SLCO1B1*5-0	ref				44890
	cholesterol	SLCO1B1*5-1	0.0392575	0.0228188	0.0556962	2.86622e-06	15670
	cholesterol	SLCO1B1*5-2	0.105514	0.0572236	0.153804	1.85085e-05	1387
	cholesterol	SLCO1B1*14-0	ref				23912
	cholesterol	SLCO1B1*14-2	-0.0143947	-0.0330407	0.00425132	0.130265	14205
	cholesterol	SLCO1B1*15-0	ref				22050
	cholesterol	SLCO1B1*15-2	0.0474534	0.0285144	0.0663925	9.10674e-07	14481
	cholesterol	SLCO1B1*20-0	ref				24295
	cholesterol	SLCO1B1*20-2	-0.0043532	-0.0294288	0.0207224	0.733666	6179
	cholesterol	SLCO1B1*37-0	ref				24455
	cholesterol	SLCO1B1*37-1	0.0148909	-0.000702044	0.0304839	0.0612501	27384
	cholesterol	SLCO1B1*37-2	0.0116999	-0.0099377	0.0333374	0.289244	9249
	cholesterol	SLCO1B1*45-0	ref				60951
	cholesterol	SLCO1B1*45-1	0.0326888	-0.184005	0.249382	0.767487	67
	cholesterol	SLCO1B1*46-0	ref				21741
	cholesterol	SLCO1B1*46-2	0.00890352	-0.0061551	0.0239622	0.246525	38325
	cholesterol	SLCO1B1*4-0	ref				45875
	cholesterol	SLCO1B1*4-1	-0.0287822	-0.0462144	-0.01135	0.00121246	13347
	cholesterol	SLCO1B1*4-2	-0.052969	-0.09982	-0.00611797	0.0267018	1477
	cholesterol	SLCO1B1*19-0	ref				55563
	cholesterol	SLCO1B1*19-1	-0.0138324	-0.0375003	0.00983553	0.252017	6232
	cholesterol	SLCO1B1*19-2	-0.0443073	-0.187273	0.0986586	0.543573	154
	crp	SLCO1B1*5-0	ref				44817
	crp	SLCO1B1*5-1	0.11226	0.028627	0.195894	0.00851942	15624
	crp	SLCO1B1*5-2	0.15325	-0.0928949	0.399396	0.222365	1378
	crp	SLCO1B1*14-0	ref				23861
	crp	SLCO1B1*14-2	-0.0696021	-0.164357	0.0251533	0.149966	14188
	crp	SLCO1B1*15-0	ref				22005
	crp	SLCO1B1*15-2	0.069102	-0.0283631	0.166567	0.164659	14434
	crp	SLCO1B1*20-0	ref				24244
	crp	SLCO1B1*20-2	-0.0481961	-0.178567	0.0821751	0.468724	6168
	crp	SLCO1B1*37-0	ref				24404
	crp	SLCO1B1*37-1	-0.0243489	-0.103589	0.054891	0.547003	27333
	crp	SLCO1B1*37-2	-0.0509827	-0.160954	0.0589885	0.363543	9228
	crp	SLCO1B1*45-0	ref				60830
	crp	SLCO1B1*45-1	0.228738	-0.870698	1.32818	0.683443	67
	crp	SLCO1B1*46-0	ref				21697
	crp	SLCO1B1*46-2	-0.014474	-0.090898	0.06195	0.710491	38253
	crp	SLCO1B1*4-0	ref				45767
	crp	SLCO1B1*4-1	-0.048969	-0.137493	0.0395555	0.278284	13333
	crp	SLCO1B1*4-2	-0.290492	-0.528573	-0.0524097	0.0167865	1473
	crp	SLCO1B1*19-0	ref				55446
	crp	SLCO1B1*19-1	-0.00163467	-0.121933	0.118664	0.978753	6221
	crp	SLCO1B1*19-2	-0.258157	-0.98417	0.467857	0.485852	154
	cystatin c	SLCO1B1*5-0	ref				44899
	cystatin c	SLCO1B1*5-1	-0.00273354	-0.00709576	0.00162867	0.219379	15669
	cystatin c	SLCO1B1*5-2	-0.0103127	-0.0231407	0.00251525	0.115108	1384
	cystatin c	SLCO1B1*14-0	ref				23915
	cystatin c	SLCO1B1*14-2	0.00396306	-0.000973681	0.0088998	0.115635	14209
	cystatin c	SLCO1B1*15-0	ref				22052
	cystatin c	SLCO1B1*15-2	-0.0023212	-0.00724549	0.00260309	0.355553	14477
	cystatin c	SLCO1B1*20-0	ref				24297
	cystatin c	SLCO1B1*20-2	0.00143269	-0.00505195	0.00791732	0.664999	6179
	cystatin c	SLCO1B1*37-0	ref				24457
	cystatin c	SLCO1B1*37-1	0.0016355	-0.00250733	0.00577833	0.43908	27389
	cystatin c	SLCO1B1*37-2	-0.00267282	-0.00842234	0.0030767	0.362225	9247
	cystatin c	SLCO1B1*45-0	ref				60955
	cystatin c	SLCO1B1*45-1	0.010735	-0.046911	0.068381	0.715121	67
	cystatin c	SLCO1B1*46-0	ref				21742
	cystatin c	SLCO1B1*46-2	-7.58066e-06	-0.00402071	0.00400555	0.997046	38328
	cystatin c	SLCO1B1*4-0	ref				45878
	cystatin c	SLCO1B1*4-1	0.00544951	0.000824116	0.0100749	0.0209372	13351
	cystatin c	SLCO1B1*4-2	-0.00198325	-0.0144202	0.0104537	0.754627	1476
	cystatin c	SLCO1B1*19-0	ref				55568
	cystatin c	SLCO1B1*19-1	0.0013344	-0.00494247	0.00761127	0.676922	6231
	cystatin c	SLCO1B1*19-2	-0.0133534	-0.0511441	0.0244372	0.488589	155
	hba1c	SLCO1B1*5-0	ref				44950
	hba1c	SLCO1B1*5-1	0.00252757	-0.183017	0.188072	0.9787	15612
	hba1c	SLCO1B1*5-2	0.261503	-0.281172	0.804178	0.344937	1396
	hba1c	SLCO1B1*14-0	ref				23890
	hba1c	SLCO1B1*14-2	0.015593	-0.197579	0.228765	0.886002	14254
	hba1c	SLCO1B1*15-0	ref				22024
	hba1c	SLCO1B1*15-2	0.05356	-0.159204	0.266323	0.621739	14434
	hba1c	SLCO1B1*20-0	ref				24269
	hba1c	SLCO1B1*20-2	-0.031598	-0.307415	0.244219	0.822342	6181
	hba1c	SLCO1B1*37-0	ref				24429
	hba1c	SLCO1B1*37-1	0.0858788	-0.0897654	0.261523	0.337916	27401
	hba1c	SLCO1B1*37-2	-0.0753663	-0.318864	0.168131	0.544093	9275
	hba1c	SLCO1B1*45-0	ref				60965
	hba1c	SLCO1B1*45-1	2.11998	-0.343446	4.5834	0.0916643	66
	hba1c	SLCO1B1*46-0	ref				21708
	hba1c	SLCO1B1*46-2	0.0356736	-0.134137	0.205484	0.680526	38362
	hba1c	SLCO1B1*4-0	ref				45858
	hba1c	SLCO1B1*4-1	-0.0693588	-0.266067	0.127349	0.489519	13379
	hba1c	SLCO1B1*4-2	0.197547	-0.328208	0.723303	0.461468	1497
	hba1c	SLCO1B1*19-0	ref				55576
	hba1c	SLCO1B1*19-1	-0.0662959	-0.333135	0.200544	0.626295	6228
	hba1c	SLCO1B1*19-2	0.00322637	-1.57279	1.57924	0.996799	161
	ldl	SLCO1B1*5-0	ref				44821
	ldl	SLCO1B1*5-1	0.0218117	0.00985113	0.0337722	0.000351488	15640
	ldl	SLCO1B1*5-2	0.0809423	0.0457886	0.116096	6.40747e-06	1383
	ldl	SLCO1B1*14-0	ref				23870
	ldl	SLCO1B1*14-2	-0.0136241	-0.0271812	-6.70182e-05	0.0488854	14181
	ldl	SLCO1B1*15-0	ref				22015
	ldl	SLCO1B1*15-2	0.025784	0.0120301	0.0395379	0.00023886	14454
	ldl	SLCO1B1*20-0	ref				24254
	ldl	SLCO1B1*20-2	-0.00758756	-0.0257936	0.0106185	0.414028	6173
	ldl	SLCO1B1*37-0	ref				24413
	ldl	SLCO1B1*37-1	0.00579483	-0.00554876	0.0171384	0.316715	27340
	ldl	SLCO1B1*37-2	0.00237996	-0.0133602	0.0181201	0.766962	9235
	ldl	SLCO1B1*45-0	ref				60852
	ldl	SLCO1B1*45-1	-0.00967981	-0.167182	0.147822	0.904122	67
	ldl	SLCO1B1*46-0	ref				21707
	ldl	SLCO1B1*46-2	0.00216251	-0.00879164	0.0131167	0.698813	38263
	ldl	SLCO1B1*4-0	ref				45798
	ldl	SLCO1B1*4-1	-0.0217372	-0.0344172	-0.00905715	0.000780086	13324
	ldl	SLCO1B1*4-2	-0.0348645	-0.0689377	-0.000791375	0.0449156	1475
	ldl	SLCO1B1*19-0	ref				55469
	ldl	SLCO1B1*19-1	-0.01175	-0.0289663	0.00546632	0.181013	6223
	ldl	SLCO1B1*19-2	-0.0115352	-0.115455	0.0923841	0.827773	154
	triglycerides	SLCO1B1*5-0	ref				44858
	triglycerides	SLCO1B1*5-1	0.0484883	0.0291283	0.0678484	9.18473e-07	15662
	triglycerides	SLCO1B1*5-2	0.122801	0.0659247	0.179678	2.32235e-05	1386
	triglycerides	SLCO1B1*14-0	ref				23892
	triglycerides	SLCO1B1*14-2	-0.00810819	-0.0300914	0.013875	0.469742	14198
	triglycerides	SLCO1B1*15-0	ref				22033
	triglycerides	SLCO1B1*15-2	0.0477716	0.0253011	0.0702422	3.09594e-05	14475
	triglycerides	SLCO1B1*20-0	ref				24275
	triglycerides	SLCO1B1*20-2	-0.0281574	-0.0575569	0.00124212	0.0605063	6177
	triglycerides	SLCO1B1*37-0	ref				24435
	triglycerides	SLCO1B1*37-1	0.00322333	-0.0151296	0.0215762	0.730675	27367
	triglycerides	SLCO1B1*37-2	0.0103122	-0.0151509	0.0357752	0.42734	9247
	triglycerides	SLCO1B1*45-0	ref				60911
	triglycerides	SLCO1B1*45-1	0.248618	-0.00665307	0.503889	0.056282	67
	triglycerides	SLCO1B1*46-0	ref				21724
	triglycerides	SLCO1B1*46-2	0.0112531	-0.00647779	0.028984	0.213537	38304
	triglycerides	SLCO1B1*4-0	ref				45844
	triglycerides	SLCO1B1*4-1	-0.0103466	-0.0308993	0.010206	0.323801	13340
	triglycerides	SLCO1B1*4-2	-0.03613	-0.0913708	0.0191109	0.199881	1476
	triglycerides	SLCO1B1*19-0	ref				55524
	triglycerides	SLCO1B1*19-1	-0.03204	-0.0599125	-0.00416759	0.0242611	6230
	triglycerides	SLCO1B1*19-2	-0.117915	-0.286248	0.0504182	0.16978	154
	vitamin d	SLCO1B1*5-0	ref				44470
	vitamin d	SLCO1B1*5-1	-0.738559	-1.13007	-0.347052	0.000218031	15494
	vitamin d	SLCO1B1*5-2	-2.7372	-3.88855	-1.58586	3.17476e-06	1369
	vitamin d	SLCO1B1*14-0	ref				23681
	vitamin d	SLCO1B1*14-2	0.780893	0.332213	1.22957	0.000647525	14084
	vitamin d	SLCO1B1*15-0	ref				21844
	vitamin d	SLCO1B1*15-2	-0.565154	-1.01404	-0.116268	0.0136059	14319
	vitamin d	SLCO1B1*20-0	ref				24060
	vitamin d	SLCO1B1*20-2	0.678278	0.0780938	1.27846	0.0267684	6108
	vitamin d	SLCO1B1*37-0	ref				24219
	vitamin d	SLCO1B1*37-1	0.251838	-0.119068	0.622744	0.183268	27121
	vitamin d	SLCO1B1*37-2	0.148693	-0.366276	0.663663	0.571447	9146
	vitamin d	SLCO1B1*45-0	ref				60342
	vitamin d	SLCO1B1*45-1	-1.63912	-6.80368	3.52545	0.533913	66
	vitamin d	SLCO1B1*46-0	ref				21535
	vitamin d	SLCO1B1*46-2	0.080485	-0.277219	0.438189	0.659214	37933
	vitamin d	SLCO1B1*4-0	ref				45405
	vitamin d	SLCO1B1*4-1	0.787832	0.373428	1.20224	0.000194622	13238
	vitamin d	SLCO1B1*4-2	0.506817	-0.608893	1.62253	0.373296	1459
	vitamin d	SLCO1B1*19-0	ref				55021
	vitamin d	SLCO1B1*19-1	0.64391	0.0801123	1.20771	0.0251944	6161
	vitamin d	SLCO1B1*19-2	-0.317561	-3.70404	3.06892	0.854177	154

## Sheet: Table S2
	Table S2 - GP-diagnosed muscle symptoms and discontinuation of statin therapy associations with star variants
	GP-diagnosed Muscle symptoms
	Allele	N	n	%	HR	0.95	CI	p		Muscle symptoms refer GP-diagnosed muscle symptoms including myopathy, myalgia, myositis or rhabdomyolysis. The Tableshows the results for patients being on statin prescriptions for at least 5 years. Discontinuation is patients had their last prescription at least 3 months prior to the censoring date (removal from GP list) or by February 28, 2016, if no deduction date was available. Models were a…
	*4-CC	25921	1132	4.37	ref					The Tableshows the results for patients being on statin prescriptions for at least 5 years.
	*4-CA	7251	312	4.3	0.98	0.86	1.11	0.75
	*4-AA	816	30	3.68	0.84	0.58	1.21	0.34
	*5-TT	25068	1052	4.2	ref
	*5-TC	8779	409	4.66	1.12	1	1.25	0.06
	*5-CC	825	40	4.85	1.18	0.86	1.62	0.31
	*37-AA	13858	554	4	ref
	*37-AG	15100	697	4.62	1.16	1.04	1.3	0.01
	*37-GG	5182	229	4.42	1.12	0.96	1.31	0.15
	*19-AA	31144	1326	4.26	ref
	*19-AC	3443	169	4.91	1.16	0.99	1.36	0.07
	*19-CC	94	5	5.32	1.27	0.53	3.05	0.6
	No * 14	13562	539	3.97	ref
	* 14	7722	331	4.29	1.08	0.94	1.24	0.27
	No * 15	12482	503	4.03	ref
	* 15	8128	395	4.86	1.22	1.07	1.39	3*10-3
	No * 20	13768	548	3.98	ref
	* 20	3425	168	4.91	1.25	1.05	1.48	0.01
	No * 45	34149	1474	4.32	ref
	* 45	44	1	2.27	0.54	0.08	3.83	0.54
	No * 46	12315	497	4.04	ref
	* 46	42	1	2.38	0.6	0.08	4.3	0.61
	Discontinuation to statins
	Allele	N	n	%	HR	0.95	CI	p
	*4-CC	53731	12028	22.39	ref
	*4-CA	5871	1325	22.57	0.99	0.95	1.03	0.65
	*4-AA	171	36	21.05	0.93	0.83	1.05	0.23
	*5-TT	43198	9603	22.23	ref
	*5-TC	15164	3437	22.67	1.03	0.99	1.07	0.18
	*5-CC	1407	345	24.52	1.12	1.01	1.25	0.04
	*37-AA	23937	5298	22.13	ref
	*37-AG	26141	5933	22.7	1.03	0.99	1.07	0.13
	*37-GG	8853	1979	22.35	1.01	0.96	1.06	0.67
	*19-AA	53731	12028	22.39	ref
	*19-AC	5871	1325	22.57	1.01	0.95	1.06	0.85
	*19-CC	171	36	21.05	0.96	0.69	1.33	0.8
	No * 14	23408	5176	22.11	ref
	* 14	13316	2959	22.22	1	0.96	1.05	0.84
	No * 15	21535	4772	22.16	ref
	* 15	14011	3232	23.07	1.05	1	1.1	0.04
	No * 20	23788	5266	22.14	ref
	* 20	5856	1325	22.63	1.02	0.96	1.09	0.43
	No * 45	58849	13181	22.4	ref
	* 45	73	18	24.66	1.05	0.66	1.66	0.84
	No * 46	21236	4700	22.13	ref
	* 46	68	17	25	1.03	0.64	1.66	0.9

## Sheet: Table S3
	Table S3- Associations between discontinuation of statins and common SLCO1B1 variants in patients prescribed statins stratified by sex
	Men
	exposure	HR	0.95	CI	p	N	n cases	%			HR	Hazard ratio
	SLCO1B1*5-0	ref				24763	5085	20.5347			%	percentage of the cases in the genotype group
	SLCO1B1*5-2	1.07223	0.92334	1.24512	0.360561	809	178	22.0025				Discontinuation is described as when
	SLCO1B1*14-0	ref				13324	2685	20.1516				patients had their last prescription at least 3 months prior to the censoring date (removal from GP list)
	SLCO1B1*14-2	1.02061	0.95921	1.08595	0.519239	7709	1589	20.6123				or by February 28, 2016, if no deduction date was available.
	SLCO1B1*15-0	ref				12246	2497	20.3903			0	wild type
	SLCO1B1*15-2	1.06704	1.00368	1.13439	0.0377412	8035	1741	21.6677			2	homozygotes for common variants, and carriers of haplotypes
	SLCO1B1*20-0	ref				13537	2733	20.1891
	SLCO1B1*20-2	1.04091	0.958722	1.13015	0.339343	3428	717	20.916
	SLCO1B1*37-0	ref				13622	2750	20.1879
	SLCO1B1*37-2	1.05239	0.981015	1.12896	0.154139	5126	1087	21.2056
	SLCO1B1*45-0	ref				33738	6975	20.674
	SLCO1B1*45-1	1.048	0.594759	1.84664	0.87114	47	12	25.5319
	SLCO1B1*46-0	ref				12078	2457	20.3428
	SLCO1B1*46-2	1.14125	0.647109	2.01273	0.648083	44	12	27.2727
	SLCO1B1*4-0	ref				25566	5291	20.6955
	SLCO1B1*4-2	0.889993	0.757451	1.04573	0.156626	809	152	18.7886
	SLCO1B1*19-0	ref				30737	6357	20.6819
	SLCO1B1*19-2	0.85483	0.538179	1.35779	0.506435	102	18	17.6471
	Women
	exposure	HR	0.95	CI	p	N	n cases	%
	SLCO1B1*5-0	ref				18435	4518	24.5077
	SLCO1B1*5-2	1.17698	1.00847	1.37365	0.038737	598	167	27.9264
	SLCO1B1*14-0	ref				10084	2491	24.7025
	SLCO1B1*14-2	0.987629	0.924595	1.05496	0.711433	5607	1370	24.4337
	SLCO1B1*15-0	ref				9289	2275	24.4913
	SLCO1B1*15-2	1.02867	0.963626	1.0981	0.396343	5976	1491	24.9498
	SLCO1B1*20-0	ref				10251	2533	24.7098
	SLCO1B1*20-2	1.0078	0.922412	1.1011	0.863401	2428	608	25.0412
	SLCO1B1*37-0	ref				10315	2548	24.7019
	SLCO1B1*37-2	0.966129	0.895168	1.04272	0.376001	3727	892	23.9335
	SLCO1B1*45-0	ref				25111	6206	24.7143
	SLCO1B1*45-1	1.0509	0.471783	2.3409	0.90329	26	6	23.0769
	SLCO1B1*46-0	ref				9158	2243	24.4922
	SLCO1B1*46-2	0.922491	0.383468	2.21919	0.857048	24	5	20.8333
	SLCO1B1*4-0	ref				19125	4754	24.8575
	SLCO1B1*4-2	0.987622	0.836223	1.16643	0.883369	580	143	24.6552
	SLCO1B1*19-0	ref				22994	5671	24.663
	SLCO1B1*19-2	1.1069	0.696802	1.75837	0.667108	69	18	26.087

## Sheet: Table S4
	Table S4- Associations between hospital inpatient coronary heart diseases (angina/myocardial infarction) and common variants in patients* presribed statins
	exposure	HR	0.95	CI	p	N	n cases	%
	SLCO1B1*5-0	ref				45112	10319	22.8742			HR	Hazard ratio
	SLCO1B1*5-2	0.943618	0.844526	1.05434	0.305253	1473	322	21.8601			%	percentage of the cases in the genotype group
	SLCO1B1*14-0	ref				24473	5666	23.152			*	European ancestry patients,
	SLCO1B1*14-2	0.960648	0.919496	1.00364	0.0723009	13898	3104	22.3341				older than 40 years at the time of their first statin prescription,
	SLCO1B1*15-0	ref				22515	5224	23.2023				had a minimum of two months' worth of prescriptions during the prescription period.
	SLCO1B1*15-2	0.968382	0.926985	1.01163	0.149476	14589	3276	22.4553			0	wild type
	SLCO1B1*20-0	ref				24862	5750	23.1277			2	homozygotes for common variants, and carriers of haplotypes
	SLCO1B1*20-2	0.976292	0.920734	1.0352	0.422178	6110	1390	22.7496
	SLCO1B1*37-0	ref				25020	5788	23.1335
	SLCO1B1*37-2	0.941861	0.8954	0.990732	0.0203016	9244	2028	21.9386
	SLCO1B1*45-0	ref				61412	13993	22.7854
	SLCO1B1*45-1	0.883966	0.54135	1.44342	0.622025	73	16	21.9178
	SLCO1B1*46-0	ref				22202	5160	23.2411
	SLCO1B1*46-2	0.85143	0.512873	1.41347	0.534003	68	15	22.0588
	SLCO1B1*4-0	ref				46633	10691	22.9258
	SLCO1B1*4-2	0.943072	0.84295	1.05509	0.306043	1444	314	21.7452
	SLCO1B1*19-0	ref				56069	12767	22.7702
	SLCO1B1*19-2	0.982389	0.720231	1.33997	0.910676	181	40	22.0994

## Sheet: Table S5
	Table S5- Associations between hospital inpatient stroke diagnoses and common variants in patients* presribed statins
	exposure	HR	0.95	CI	p	N	n cases	%
	*4-CC	REF	REF	REF	REF	46633	1182	2.53469			HR	Hazard ratio
	*4-CA	0.998815	0.884046	1.12848	0.984815	13055	330	2.52777			%	percentage of the cases in the genotype group
	*4-AA	0.896613	0.634379	1.26725	0.536424	1444	33	2.28532			*	European ancestry patients,
	*5-TT	REF	REF	REF	REF	45112	1131	2.50709				older than 40 years at the time of their first statin prescription,
	*5-TC	1.01241	0.903	1.13508	0.832586	15785	397	2.51505				had a minimum of two months' worth of prescriptions during the prescription period.
	*5-CC	0.916716	0.654793	1.28341	0.612492	1473	35	2.3761			0	wild type
	*37-AA	REF	REF	REF	REF	25020	640	2.55795			2	homozygotes for common variants, and carriers of haplotypes
	*37-AG	0.970828	0.871267	1.08177	0.591753	27229	674	2.4753
	*37-GG	0.96431	0.828781	1.122	0.638141	9244	227	2.45565
	*19-AA	REF	REF	REF	REF	56069	1386	2.47195
	*19-AC	1.1408	0.974001	1.33615	0.102401	6127	173	2.82357
	*19-CC	1.14746	0.476791	2.76153	0.758858	181	5	2.76243
	No * 14	REF	REF	REF	REF	24473	627	2.56201
	* 14	0.962679	0.843805	1.0983	0.571648	13898	342	2.46079
	No * 15	REF	REF	REF	REF	22515	579	2.57162
	* 15	0.987671	0.866671	1.12556	0.85241	14589	368	2.52245
	No * 20	REF	REF	REF	REF	24862	637	2.56214
	* 20	1.11243	0.940686	1.31554	0.213015	6110	174	2.84779
	‘No * 45	REF	REF	REF	REF	61412	1544	2.51417
	* 45	0.507567	0.0714358	3.60637	0.497881	73	1	1.36986
	No * 46	REF	REF	REF	REF	22202	575	2.58986
	* 46	0.52805	0.0742385	3.75596	0.523518	68	1	1.47059

## Sheet: Table S6
	Table S6- Baseline lipid biomarker associations with rare variants in participants reported statin use
														r2 : correlation with SLCO1B1*5
	outcome	variant	coef	lci	uci	p	n	r2	mac	maf	Consequence	IMPACT		mac: minor allele count
	cholesterol	12:21222355:C:T	0.0408016	-0.175366	0.25697	0.711422	61018	0.00262085	67	0.0549072	stop_gained	HIGH		maf: minor allele frequency
	cholesterol	12:21222349:G:A	0.00292548	-0.260949	0.2668	0.982664	57168	0.000167	45	0.0393611	missense_variant	MODERATE		mac>3 included in the analyses
	cholesterol	12:21174667:T:C	-0.0548979	-0.341705	0.231909	0.707539	62001	0.000116	38	0.0306476	missense_variant	MODERATE		statin: atorvastatin or simvastatin
	cholesterol	12:21178996:G:A	0.0952181	-0.195409	0.385845	0.520776	61990	4.33e-05	37	0.0298464	missense_variant	MODERATE
	cholesterol	12:21217194:C:T	-0.035323	-0.388868	0.318222	0.844748	62000	5.01e-07	25	0.0201632	missense_variant	MODERATE
	cholesterol	12:21224840:G:A	0.253504	-0.141689	0.648697	0.208658	61887	0.000261	20	0.01616	splice_donor_variant	HIGH
	cholesterol	12:21141639:G:C	-0.252135	-0.668752	0.164481	0.235553	61997	1.97e-05	18	0.0145182	missense_variant	MODERATE
	cholesterol	12:21202674:T:G	-0.283801	-0.712492	0.14489	0.194445	61998	4.22e-06	17	0.0137114	missense_variant	MODERATE
	cholesterol	12:21202677:C:A	-0.176822	-0.605551	0.251907	0.418881	61996	1.59e-05	17	0.0137119	missense_variant	MODERATE
	cholesterol	12:21239025:G:C	-0.144722	-0.601245	0.311802	0.534381	61992	9.11e-06	15	0.0120995	missense_variant	MODERATE
	cholesterol	12:21202664:G:A	0.0159049	-0.440447	0.472257	0.945539	61999	6.2e-06	15	0.0120981	missense_variant	MODERATE
	cholesterol	12:21224839:C:T	-0.336455	-0.80883	0.13592	0.162709	61947	4.57e-05	14	0.0113011	missense_variant,splice_region_variant	MODERATE
	cholesterol	12:21202555:C:G	-0.0821429	-0.554588	0.390302	0.73327	61999	6.2e-06	14	0.0112916	missense_variant	MODERATE
	cholesterol	12:21178931:A:G	0.211878	-0.321001	0.744758	0.435797	61990	2.99e-05	11	0.00887326	missense_variant	MODERATE
	cholesterol	12:21239091:G:C	-0.200439	-0.733332	0.332454	0.460989	61996	4.39e-07	11	0.0088724	missense_variant	MODERATE
	cholesterol	12:21224803:G:A	-0.0682284	-0.60125	0.464794	0.801903	61996	0.000345	11	0.0088724	missense_variant	MODERATE
	cholesterol	12:21172734:C:T	-0.0754775	-0.63436	0.483405	0.791242	62001	2.49e-05	10	0.00806517	missense_variant	MODERATE
	cholesterol	12:21178988:A:C	0.0460284	-0.51294	0.604997	0.871781	61999	2.49e-05	10	0.00806543	missense_variant	MODERATE
	cholesterol	12:21172776:G:A	0.996707	0.371844	1.62157	0.00177068	62001	1.52e-05	8	0.00645213	missense_variant	MODERATE
	cholesterol	12:21141612:C:A	-0.139222	-0.764124	0.485681	0.662354	61997	4.51e-05	8	0.00645255	missense_variant	MODERATE
	cholesterol	12:21172651:T:A	0.200782	-0.46722	0.868784	0.555783	62001	0.000318	7	0.00564562	missense_variant,splice_region_variant	MODERATE
	cholesterol	12:21239030:ATATAT:A	-0.121618	-0.78959	0.546354	0.721199	61918	3.95e-05	7	0.00565318	frameshift_variant	HIGH
	cholesterol	12:21176826:C:T	-0.0986464	-0.766731	0.569438	0.772273	61966	1.07e-05	7	0.00564881	missense_variant	MODERATE
	cholesterol	12:21200569:G:C	0.946068	0.224587	1.66755	0.0101686	62001	3.38e-05	6	0.0048391	missense_variant	MODERATE
	cholesterol	12:21239079:A:G	-0.424541	-1.14609	0.297008	0.248827	61992	0.000188	6	0.0048398	missense_variant	MODERATE
	cholesterol	12:21238991:G:C	0.397229	-0.324338	1.1188	0.280593	61975	4.83e-07	6	0.00484113	missense_variant	MODERATE
	cholesterol	12:21178603:T:C	-0.281653	-1.00325	0.439948	0.444262	61985	6.55e-06	6	0.00484035	missense_variant	MODERATE
	cholesterol	12:21222346:A:G	-0.232176	-0.953514	0.489162	0.528133	59173	7.07e-06	6	0.00507039	missense_variant	MODERATE
	cholesterol	12:21178635:C:T	0.0615366	-0.659893	0.782966	0.867226	61996	3.38e-05	6	0.00483949	missense_variant	MODERATE
	cholesterol	12:21197108:A:G	-0.0377224	-0.759169	0.683725	0.918374	62001	3.38e-05	6	0.0048391	missense_variant	MODERATE
	cholesterol	12:21202568:G:A	-0.0192867	-0.740754	0.702181	0.958213	62001	3.38e-05	6	0.0048391	missense_variant	MODERATE
	cholesterol	12:21217264:C:T	0.434907	-0.355438	1.22525	0.280798	62001	3.04e-06	5	0.00403258	missense_variant	MODERATE
	cholesterol	12:21178687:A:G	-0.384801	-1.1751	0.405499	0.339918	61998	3.32e-06	5	0.00403278	missense_variant	MODERATE
	cholesterol	12:21239080:T:TC	-0.354671	-1.14527	0.435932	0.379257	61989	2.82e-05	5	0.00403336	frameshift_variant	HIGH
	cholesterol	12:21196984:G:A	0.187112	-0.603236	0.97746	0.642633	62000	3.32e-06	5	0.00403265	missense_variant	MODERATE
	cholesterol	12:21239145:C:T	0.0619365	-0.72919	0.853063	0.878047	62001	0.000259	5	0.00403258	missense_variant	MODERATE
	cholesterol	12:21178693:C:T	0.010201	-0.780372	0.800774	0.979823	61995	2.82e-05	5	0.00403297	missense_variant	MODERATE
	cholesterol	12:21172717:C:T	-0.00914486	-0.799902	0.781612	0.981916	61997	3.33e-06	5	0.00403284	missense_variant	MODERATE
	cholesterol	12:21179006:G:A	1.34579	0.462221	2.22937	0.00283383	61996	5.8e-07	4	0.00322633	missense_variant	MODERATE	not rare
	cholesterol	12:21197068:A:C	-0.83219	-1.7159	0.0515256	0.0649375	62001	2.26e-05	4	0.00322607	missense_variant	MODERATE
	cholesterol	12:21239083:A:G	0.766336	-0.117284	1.64996	0.0891648	61989	5.79e-07	4	0.00322669	missense_variant	MODERATE
	cholesterol	12:21174668:T:G	0.459218	-0.424374	1.34281	0.308375	62001	2.26e-05	4	0.00322607	missense_variant	MODERATE
	cholesterol	12:21176813:G:GA	0.254521	-0.629321	1.13836	0.572468	61975	0.000231	4	0.00322742	frameshift_variant	HIGH
	cholesterol	12:21178992:G:T	-0.10954	-0.993133	0.774053	0.80802	61998	5.8e-07	4	0.00322622	missense_variant	MODERATE
	cholesterol	12:21172740:T:C	-0.0248145	-0.908413	0.858784	0.956104	62001	5.8e-07	4	0.00322607	missense_variant	MODERATE
	cholesterol	12:21200571:C:T	-0.00745035	-0.893186	0.878286	0.986846	61998	5.8e-07	4	0.00322622	missense_variant	MODERATE
	ldl	12:21222355:C:T	-0.003088	-0.160284	0.154108	0.969287	60919	0.00262085	67	0.0549072	stop_gained	HIGH
	ldl	12:21222349:G:A	-0.0071789	-0.201355	0.186997	0.942234	57071	0.000167	45	0.0393611	missense_variant	MODERATE
	ldl	12:21174667:T:C	-0.000384	-0.208961	0.208193	0.99712	61898	0.000116	38	0.0306476	missense_variant	MODERATE
	ldl	12:21178996:G:A	0.0838922	-0.124667	0.292452	0.430465	61887	4.33e-05	37	0.0298464	missense_variant	MODERATE
	ldl	12:21217194:C:T	0.0399063	-0.217205	0.297017	0.760967	61897	5.01e-07	25	0.0201632	missense_variant	MODERATE
	ldl	12:21224840:G:A	0.237073	-0.0577457	0.531891	0.115008	61784	0.000261	20	0.01616	splice_donor_variant	HIGH
	ldl	12:21141639:G:C	-0.171363	-0.474344	0.131617	0.267624	61894	1.97e-05	18	0.0145182	missense_variant	MODERATE
	ldl	12:21202674:T:G	-0.194876	-0.506634	0.116881	0.220514	61895	4.22e-06	17	0.0137114	missense_variant	MODERATE
	ldl	12:21202677:C:A	-0.18256	-0.494348	0.129229	0.251128	61893	1.59e-05	17	0.0137119	missense_variant	MODERATE
	ldl	12:21239025:G:C	-0.112427	-0.444419	0.219564	0.506856	61889	9.11e-06	15	0.0120995	missense_variant	MODERATE
	ldl	12:21202664:G:A	0.00162457	-0.330249	0.333498	0.992345	61896	6.2e-06	15	0.0120981	missense_variant	MODERATE
	ldl	12:21224839:C:T	-0.30547	-0.648999	0.0380585	0.0813634	61844	4.57e-05	14	0.0113011	missense_variant,splice_region_variant	MODERATE
	ldl	12:21202555:C:G	-0.0501685	-0.393749	0.293412	0.774731	61896	6.2e-06	14	0.0112916	missense_variant	MODERATE
	ldl	12:21178931:A:G	0.239029	-0.148501	0.626559	0.226695	61888	2.99e-05	11	0.00887326	missense_variant	MODERATE
	ldl	12:21239091:G:C	-0.0498163	-0.456276	0.356644	0.81016	61893	4.39e-07	11	0.0088724	missense_variant	MODERATE
	ldl	12:21224803:G:A	0.0237679	-0.363867	0.411403	0.904343	61893	0.000345	11	0.0088724	missense_variant	MODERATE
	ldl	12:21178988:A:C	0.229827	-0.176673	0.636327	0.267804	61896	2.49e-05	10	0.00806543	missense_variant	MODERATE
	ldl	12:21172734:C:T	-0.203631	-0.610068	0.202805	0.326107	61898	2.49e-05	10	0.00806517	missense_variant	MODERATE
	ldl	12:21172776:G:A	0.695366	0.24094	1.14979	0.00270788	61898	1.52e-05	8	0.00645213	missense_variant	MODERATE
	ldl	12:21141612:C:A	-0.0457489	-0.500201	0.408703	0.843586	61894	4.51e-05	8	0.00645255	missense_variant	MODERATE
	ldl	12:21176826:C:T	-0.0806965	-0.566538	0.405145	0.744767	61863	1.07e-05	7	0.00564881	missense_variant	MODERATE
	ldl	12:21172651:T:A	0.0557796	-0.430016	0.541575	0.821942	61898	0.000318	7	0.00564562	missense_variant,splice_region_variant	MODERATE
	ldl	12:21239030:ATATAT:A	0.0392309	-0.446541	0.525003	0.874229	61815	3.95e-05	7	0.00565318	frameshift_variant	HIGH
	ldl	12:21200569:G:C	0.6969	0.172214	1.22159	0.00923482	61898	3.38e-05	6	0.0048391	missense_variant	MODERATE
	ldl	12:21238991:G:C	0.276087	-0.248659	0.800832	0.30244	61872	4.83e-07	6	0.00484113	missense_variant	MODERATE
	ldl	12:21239079:A:G	-0.226522	-0.751266	0.298223	0.397504	61889	0.000188	6	0.0048398	missense_variant	MODERATE
	ldl	12:21178603:T:C	-0.179428	-0.704196	0.34534	0.502759	61882	6.55e-06	6	0.00484035	missense_variant	MODERATE
	ldl	12:21178635:C:T	0.131777	-0.392868	0.656421	0.622509	61893	3.38e-05	6	0.00483949	missense_variant	MODERATE
	ldl	12:21197108:A:G	-0.0723195	-0.596981	0.452342	0.787033	61898	3.38e-05	6	0.0048391	missense_variant	MODERATE
	ldl	12:21202568:G:A	0.0358217	-0.44994	0.521584	0.885077	61898	3.38e-05	6	0.0048391	missense_variant	MODERATE
	ldl	12:21222346:A:G	-0.0166582	-0.540973	0.507657	0.950347	59073	7.07e-06	6	0.00507039	missense_variant	MODERATE
	ldl	12:21217264:C:T	0.376839	-0.197926	0.951603	0.198778	61898	3.04e-06	5	0.00403258	missense_variant	MODERATE
	ldl	12:21178687:A:G	-0.219685	-0.794425	0.355054	0.453752	61895	3.32e-06	5	0.00403278	missense_variant	MODERATE
	ldl	12:21178693:C:T	0.148673	-0.426262	0.723607	0.61227	61892	2.82e-05	5	0.00403297	missense_variant	MODERATE
	ldl	12:21239080:T:TC	-0.0980422	-0.672998	0.476914	0.738214	61886	2.82e-05	5	0.00403336	frameshift_variant	HIGH
	ldl	12:21196984:G:A	0.0684814	-0.506289	0.643252	0.815354	61897	3.32e-06	5	0.00403265	missense_variant	MODERATE
	ldl	12:21239145:C:T	0.0409625	-0.534373	0.616298	0.889018	61898	0.000259	5	0.00403258	missense_variant	MODERATE
	ldl	12:21172717:C:T	0.0265216	-0.548551	0.601594	0.927975	61894	3.33e-06	5	0.00403284	missense_variant	MODERATE
	ldl	12:21179006:G:A	1.05309	0.410533	1.69564	0.00131762	61893	5.8e-07	4	0.00322633	missense_variant	MODERATE
	ldl	12:21239083:A:G	0.650227	0.00764943	1.29281	0.0473347	61886	5.79e-07	4	0.00322669	missense_variant	MODERATE
	ldl	12:21197068:A:C	-0.496797	-1.13947	0.145878	0.12975	61898	2.26e-05	4	0.00322607	missense_variant	MODERATE
	ldl	12:21174668:T:G	0.366779	-0.275798	1.00936	0.263248	61898	2.26e-05	4	0.00322607	missense_variant	MODERATE
	ldl	12:21176813:G:GA	0.251744	-0.390983	0.894471	0.442671	61872	0.000231	4	0.00322742	frameshift_variant	HIGH
	ldl	12:21200571:C:T	-0.218084	-0.86221	0.426042	0.506946	61895	5.8e-07	4	0.00322622	missense_variant	MODERATE
	ldl	12:21172740:T:C	-0.139039	-0.781622	0.503544	0.671497	61898	5.8e-07	4	0.00322607	missense_variant	MODERATE
	ldl	12:21178992:G:T	0.0573716	-0.58521	0.699953	0.861084	61895	5.8e-07	4	0.00322622	missense_variant	MODERATE
	triglycerides	12:21222355:C:T	0.241346	-0.0135828	0.496274	0.0635197	60978	0.00262085	67	0.0549072	stop_gained	HIGH
	triglycerides	12:21222349:G:A	0.0191574	-0.291207	0.329522	0.903706	57132	0.000167	45	0.0393611	missense_variant	MODERATE
	triglycerides	12:21174667:T:C	-0.201161	-0.539217	0.136895	0.243498	61960	0.000116	38	0.0306476	missense_variant	MODERATE
	triglycerides	12:21178996:G:A	-0.035066	-0.373101	0.302969	0.838886	61949	4.33e-05	37	0.0298464	missense_variant	MODERATE
	triglycerides	12:21217194:C:T	-0.240678	-0.657398	0.176042	0.257637	61959	5.01e-07	25	0.0201632	missense_variant	MODERATE
	triglycerides	12:21224840:G:A	0.242795	-0.223115	0.708706	0.307071	61846	0.000261	20	0.01616	splice_donor_variant	HIGH
	triglycerides	12:21141639:G:C	-0.164996	-0.656065	0.326072	0.510187	61956	1.97e-05	18	0.0145182	missense_variant	MODERATE
	triglycerides	12:21202677:C:A	-0.459401	-0.964742	0.0459397	0.0747835	61955	1.59e-05	17	0.0137119	missense_variant	MODERATE
	triglycerides	12:21202674:T:G	-0.260729	-0.76603	0.244572	0.311859	61957	4.22e-06	17	0.0137114	missense_variant	MODERATE
	triglycerides	12:21239025:G:C	0.271823	-0.266275	0.809921	0.322127	61951	9.11e-06	15	0.0120995	missense_variant	MODERATE
	triglycerides	12:21202664:G:A	0.0634351	-0.474466	0.601336	0.817203	61958	6.2e-06	15	0.0120981	missense_variant	MODERATE
	triglycerides	12:21224839:C:T	-0.190904	-0.74782	0.366012	0.501673	61906	4.57e-05	14	0.0113011	missense_variant,splice_region_variant	MODERATE
	triglycerides	12:21202555:C:G	0.0631107	-0.493779	0.620001	0.82422	61958	6.2e-06	14	0.0112916	missense_variant	MODERATE
	triglycerides	12:21239091:G:C	1.35631	0.728277	1.98434	2.31e-05	61955	4.39e-07	11	0.0088724	missense_variant	MODERATE
	triglycerides	12:21224803:G:A	-0.249024	-0.877295	0.379248	0.437237	61955	0.000345	11	0.0088724	missense_variant	MODERATE
	triglycerides	12:21178931:A:G	-0.0361317	-0.664256	0.591993	0.910233	61949	2.99e-05	11	0.00887326	missense_variant	MODERATE
	triglycerides	12:21178988:A:C	0.642163	-0.016683	1.30101	0.0560903	61958	2.49e-05	10	0.00806543	missense_variant	MODERATE
	triglycerides	12:21172734:C:T	0.259213	-0.399538	0.917965	0.440565	61960	2.49e-05	10	0.00806517	missense_variant	MODERATE
	triglycerides	12:21172776:G:A	0.508309	-0.228264	1.24488	0.17619	61960	1.52e-05	8	0.00645213	missense_variant	MODERATE
	triglycerides	12:21141612:C:A	-0.085916	-0.822476	0.650644	0.819162	61956	4.51e-05	8	0.00645255	missense_variant	MODERATE
	triglycerides	12:21176826:C:T	-0.522867	-1.31035	0.264613	0.19313	61925	1.07e-05	7	0.00564881	missense_variant	MODERATE
	triglycerides	12:21172651:T:A	0.263514	-0.523859	1.05089	0.511851	61960	0.000318	7	0.00564562	missense_variant,splice_region_variant	MODERATE
	triglycerides	12:21239030:ATATAT:A	-0.256263	-1.04372	0.531199	0.52358	61877	3.95e-05	7	0.00565318	frameshift_variant	HIGH
	triglycerides	12:21197108:A:G	-1.00372	-1.85406	-0.153392	0.0206948	61960	3.38e-05	6	0.0048391	missense_variant	MODERATE
	triglycerides	12:21222346:A:G	0.751606	-0.100606	1.60382	0.083883	59134	7.07e-06	6	0.00507039	missense_variant	MODERATE
	triglycerides	12:21238991:G:C	0.384791	-0.465667	1.23525	0.375187	61934	4.83e-07	6	0.00484113	missense_variant	MODERATE
	triglycerides	12:21200569:G:C	0.346825	-0.503625	1.19727	0.424111	61960	3.38e-05	6	0.0048391	missense_variant	MODERATE
	triglycerides	12:21239079:A:G	-0.297419	-1.14783	0.552988	0.49304	61951	0.000188	6	0.0048398	missense_variant	MODERATE
	triglycerides	12:21178603:T:C	-0.286702	-1.13719	0.563783	0.508792	61944	6.55e-06	6	0.00484035	missense_variant	MODERATE
	triglycerides	12:21202568:G:A	0.147581	-0.639739	0.934901	0.713325	61960	3.38e-05	6	0.0048391	missense_variant	MODERATE
	triglycerides	12:21178635:C:T	-0.0760832	-0.926439	0.774273	0.860793	61955	3.38e-05	6	0.00483949	missense_variant	MODERATE
	triglycerides	12:21178687:A:G	-0.54568	-1.47721	0.385849	0.250912	61957	3.32e-06	5	0.00403278	missense_variant	MODERATE
	triglycerides	12:21239145:C:T	0.44681	-0.485683	1.3793	0.347659	61960	0.000259	5	0.00403258	missense_variant	MODERATE
	triglycerides	12:21217264:C:T	0.432845	-0.498736	1.36442	0.362466	61960	3.04e-06	5	0.00403258	missense_variant	MODERATE
	triglycerides	12:21178693:C:T	-0.395933	-1.32782	0.535953	0.404988	61954	2.82e-05	5	0.00403297	missense_variant	MODERATE
	triglycerides	12:21196984:G:A	0.259956	-0.671615	1.19153	0.584421	61959	3.32e-06	5	0.00403265	missense_variant	MODERATE
	triglycerides	12:21239080:T:TC	0.24	-0.691876	1.17188	0.61371	61948	2.82e-05	5	0.00403336	frameshift_variant	HIGH
	triglycerides	12:21172717:C:T	-0.0352462	-0.967272	0.89678	0.940914	61956	3.33e-06	5	0.00403284	missense_variant	MODERATE
	triglycerides	12:21174668:T:G	0.752125	-0.289354	1.7936	0.156941	61960	2.26e-05	4	0.00322607	missense_variant	MODERATE
	triglycerides	12:21176813:G:GA	0.539376	-0.502437	1.58119	0.310231	61934	0.000231	4	0.00322742	frameshift_variant	HIGH
	triglycerides	12:21197068:A:C	0.452291	-0.589365	1.49395	0.394751	61960	2.26e-05	4	0.00322607	missense_variant	MODERATE
	triglycerides	12:21200571:C:T	-0.413136	-1.4572	0.630927	0.438004	61957	5.8e-07	4	0.00322622	missense_variant	MODERATE
	triglycerides	12:21239083:A:G	0.400068	-0.641466	1.4416	0.451535	61948	5.79e-07	4	0.00322669	missense_variant	MODERATE
	triglycerides	12:21179006:G:A	0.380582	-0.660921	1.42208	0.473861	61955	5.8e-07	4	0.00322633	missense_variant	MODERATE
	triglycerides	12:21178992:G:T	-0.299313	-1.3408	0.742177	0.573245	61957	5.8e-07	4	0.00322622	missense_variant	MODERATE
	triglycerides	12:21172740:T:C	-0.127242	-1.16874	0.914254	0.810752	61960	5.8e-07	4	0.00322607	missense_variant	MODERATE

## Sheet: Table S7
	Table S7- LDL associations in treated and untreated people estimated by TWIST*
	type	variant	label	n1	n2	model	est	se	p		*The method includes several ‘Genetically Moderated Treatment Effect’ (GMTE) analyses. GMTE0 (in untreated people), GMTE1 (in treated people), MR, RGMTE and RGMTE-MR. From these analyses, the most efficient and robust estimate of the GMTE is derived, which was RGMTE-MR for this study: combination of 2 or more estimates from different methods.
	rare	rs374113543G>A	p.Gly238Glu	1	3	GMTE0	-0.0715752	0.197379	0.716882
	rare	rs374113543G>A	p.Gly238Glu	1	2	GMTE1	1.11315	0.394751	0.00480455
	rare	rs374113543G>A	p.Gly238Glu	1	1	RGMTE	1.18472	0.441346	0.00726767
	rare	rs960742177G>C	p.Leu344Phe	2	3	GMTE0	-0.140263	0.128076	0.27345
	rare	rs960742177G>C	p.Leu344Phe	2	2	GMTE1	0.759058	0.322313	0.0185216
	rare	rs960742177G>C	p.Leu344Phe	2	1	RGMTE	0.899319	0.346827	0.00951486
	rare	rs780911188A>G	p.Asn657Ser	3	3	GMTE0	-0.184635	0.149206	0.215919
	rare	rs780911188A>G	p.Asn657Ser	3	2	GMTE1	0.770198	0.394745	0.0510427
	rare	rs780911188A>G	p.Asn657Ser	3	1	RGMTE	0.95482	0.422	0.0236603
	rare	rs373327528G>A	p.Gly71Arg	4	3	GMTE0	-0.116603	0.128076	0.362599
	rare	rs373327528G>A	p.Gly71Arg	4	2	GMTE1	0.764866	0.279138	0.00614227
	rare	rs373327528G>A	p.Gly71Arg	4	1	RGMTE	0.881461	0.307116	0.0041033
	common	SLCO1B1*5 (rs4149056T>C)	p.Val174Ala	5	3	GMTE0	-0.0108565	0.00297197	0.000259252
	common	SLCO1B1*5 (rs4149056T>C)	p.Val174Ala	5	2	GMTE1	0.0290086	0.00710416	4.44044e-05
	common	SLCO1B1*5 (rs4149056T>C)	p.Val174Ala	5	1	RGMTE	0.0398609	0.00770033	2.26173e-07
	common	SLCO1B1*15	(*5 & *37)	7	3	GMTE0	-0.00385574	0.00177565	0.0298978
	common	SLCO1B1*15	(*5 & *37)	7	2	GMTE1	0.0144974	0.00422001	0.000591793
	common	SLCO1B1*15	(*5 & *37)	7	1	RGMTE	0.0183509	0.00457808	6.11418e-05
	common	SLCO1B1*4 (rs11045819C>A)	p.Pro155Thr (GoF)	8	3	GMTE0	0.0164962	0.00272832	1.48368e-09
	common	SLCO1B1*4 (rs11045819C>A)	p.Pro155Thr (GoF)	8	2	GMTE1	-0.0197852	0.00647391	0.00224218
	common	SLCO1B1*4 (rs11045819C>A)	p.Pro155Thr (GoF)	8	1	RGMTE	-0.0362739	0.00702466	2.42113e-07
	common	SLCO1B1*14	(*4 & *37)	9	3	GMTE0	0.00753389	0.00177301	2.14597e-05
	common	SLCO1B1*14	(*4 & *37)	9	2	GMTE1	-0.00622806	0.0041817	0.136393
	common	SLCO1B1*14	(*4 & *37)	9	1	RGMTE	-0.0137564	0.00454146	0.00245336

## Sheet: Table S8
	Table S8-Descriptive table of LDL levels in patients carrying rs4149056 and the rare LoF variants
	Variants	c-LDL (mmol/L)	n			(-): people not carrying the allele
	rs4149056 carriers (-) , rare variants (-)	2.74 (SD 0.66)	47107			(+):represents people carrying the allele, n=number of people at baseline carrying the genotype described
	rs4149056 carriers (+) , rare variants (-)	2.77 (SD 0.67)	17867			n=number of people at baseline carrying the genotype described;
	rs4149056 carriers (-) , rare variants (+)	3.5 (SD 0.74)	21			The overall mean LDL is 2.75 mmol/L (SD 0.66).
	rs4149056 carriers (+) , rare variants (+)	3.7 (SD 0.22)	3			The table shows mean LDL levels of people with and without rs4149056 (*5) and LDL-increasing rare variants rs374113543, rs373327528, rs960742177, and rs780911188.
						rs4149056 :SLCO1B1*5
	Rare variants (+)	3.55 (SD 0.7)	24
	Rare variants (-)	2.75 (SD 0.67)	65037

## Sheet: Table S9
	Table S9- Baseline other biomarker associations with rare variants in participants reported statin use
	outcome	variant	coef	lci	uci	p	n	r2	mac	maf	Consequence	IMPACT
	ALT	12:21222355:C:T	0.632219	-2.73305	3.99749	0.712712	61010	0.00262244	66	0.054634	stop_gained	HIGH
	ALT	12:21222349:G:A	0.492967	-3.6092	4.59513	0.813792	57160	0.00016256	44	0.0388741	missense_variant	MODERATE		Abbreviations: ALT, Alanine aminotransferase; CRP, C-reactive protein
	ALT	12:21178996:G:A	7.02639	2.55031	11.5025	0.00209371	61981	4.75152e-05	38	0.0309598	missense_variant	MODERATE
	ALT	12:21174667:T:C	-0.540217	-5.01655	3.93612	0.813016	61992	0.000116562	38	0.0309542	missense_variant	MODERATE		Biormarker:	Units:
	ALT	12:21217194:C:T	-3.98164	-9.49952	1.53623	0.157274	61991	4.80286e-07	25	0.0203649	missense_variant	MODERATE		ALT	U/L
	ALT	12:21224840:G:A	2.67785	-3.49311	8.8488	0.395034	61878	0.000183338	19	0.0155059	splice_donor_variant	HIGH		Direct bilirubin	umol/L
	ALT	12:21141639:G:C	-4.8305	-11.3322	1.67121	0.145343	61988	1.97592e-05	18	0.0146635	missense_variant	MODERATE		cholesterol	mmol/L
	ALT	12:21202674:T:G	3.3176	-3.37338	10.0086	0.331139	61989	4.20326e-06	17	0.0138486	missense_variant	MODERATE		crp	mg/L.
	ALT	12:21202677:C:A	-0.721938	-7.41313	5.96925	0.83252	61987	1.59587e-05	17	0.0138491	missense_variant	MODERATE		cystatin c	mg/L
	ALT	12:21202664:G:A	7.74345	0.625647	14.8613	0.0329876	61990	6.20166e-06	15	0.0122192	missense_variant	MODERATE		hba1c	mmol/mol.
	ALT	12:21239025:G:C	-2.58771	-9.71333	4.53791	0.4766	61983	9.12776e-06	15	0.0122206	missense_variant	MODERATE		ldl	mmol/L
	ALT	12:21202555:C:G	1.54043	-5.83336	8.91422	0.682207	61990	6.20394e-06	14	0.0114046	missense_variant	MODERATE		triglycerides	mmol/L
	ALT	12:21224839:C:T	5.19639	-2.17797	12.5708	0.167245	61938	4.06458e-05	13	0.0105989	missense_variant,splice_region_variant	MODERATE		vitamin d	nmol/L
	ALT	12:21178931:A:G	7.3928	-0.924473	15.7101	0.0814882	61981	3.0134e-05	11	0.00896203	missense_variant	MODERATE
	ALT	12:21239091:G:C	-1.14365	-9.46081	7.1735	0.787538	61987	4.27227e-07	11	0.00896116	missense_variant	MODERATE
	ALT	12:21224803:G:A	0.973667	-7.34533	9.29267	0.818558	61987	0.000349415	11	0.00896116	missense_variant	MODERATE
	ALT	12:21178988:A:C	5.64498	-3.0791	14.3691	0.20472	61990	2.50352e-05	10	0.00814611	missense_variant	MODERATE
	ALT	12:21172734:C:T	4.84806	-3.87459	13.5707	0.275995	61992	2.50324e-05	10	0.00814584	missense_variant	MODERATE
	ALT	12:21141612:C:A	6.05901	-3.6939	15.8119	0.22336	61988	4.54759e-05	8	0.0065171	missense_variant	MODERATE
	ALT	12:21172776:G:A	3.26843	-6.48483	13.0217	0.5113	61992	1.52714e-05	8	0.00651667	missense_variant	MODERATE
	ALT	12:21172651:T:A	5.46565	-4.9601	15.8914	0.304179	61992	0.000321919	7	0.00570209	missense_variant,splice_region_variant	MODERATE
	ALT	12:21202568:G:A	-3.85742	-14.2825	6.56765	0.468315	61992	3.9788e-05	7	0.00570209	missense_variant	MODERATE
	ALT	12:21176826:C:T	-3.67096	-14.0983	6.75643	0.490186	61957	1.07422e-05	7	0.00570525	missense_variant	MODERATE
	ALT	12:21239030:ATATAT:A	0.423383	-10.0041	10.8509	0.936571	61909	3.9847e-05	7	0.00570972	frameshift_variant	HIGH
	ALT	12:21197108:A:G	-7.65361	-18.9134	3.60617	0.182776	61992	3.41035e-05	6	0.00488751	missense_variant	MODERATE
	ALT	12:21238991:G:C	6.49424	-4.76872	17.7572	0.258422	61966	5.01647e-07	6	0.00488958	missense_variant	MODERATE
	ALT	12:21222346:A:G	3.65519	-7.60582	14.9162	0.524653	59164	7.09928e-06	6	0.00512111	missense_variant	MODERATE
	ALT	12:21178603:T:C	-2.93317	-14.1958	8.32945	0.609737	61976	6.58112e-06	6	0.00488878	missense_variant	MODERATE
	ALT	12:21200569:G:C	2.60094	-8.66012	13.862	0.650769	61992	3.41035e-05	6	0.00488751	missense_variant	MODERATE
	ALT	12:21239079:A:G	-0.820377	-12.0821	10.4413	0.886465	61983	0.000190648	6	0.00488822	missense_variant	MODERATE
	ALT	12:21178635:C:T	0.0860084	-11.1741	11.3461	0.988055	61987	3.41043e-05	6	0.0048879	missense_variant	MODERATE
	ALT	12:21178687:A:G	-5.83417	-18.1689	6.50059	0.353903	61989	3.39372e-06	5	0.00407312	missense_variant	MODERATE
	ALT	12:21217264:C:T	5.74931	-6.58598	18.0846	0.360968	61992	3.04297e-06	5	0.00407292	missense_variant	MODERATE
	ALT	12:21172717:C:T	4.46407	-7.87763	16.8058	0.478362	61988	3.39459e-06	5	0.00407319	missense_variant	MODERATE
	ALT	12:21178693:C:T	3.87961	-8.45254	16.2118	0.537499	61986	2.84185e-05	5	0.00407332	missense_variant	MODERATE
	ALT	12:21239080:T:TC	1.89126	-10.4476	14.2301	0.763856	61980	2.84203e-05	5	0.00407372	frameshift_variant	HIGH
	ALT	12:21196984:G:A	-0.565587	-12.9008	11.7696	0.928392	61991	3.39316e-06	5	0.00407299	missense_variant	MODERATE
	ALT	12:21239145:C:T	-0.0393928	-12.3869	12.3081	0.995011	61992	0.000262061	5	0.00407292	missense_variant	MODERATE
	ALT	12:21200571:C:T	10.6505	-3.17369	24.4746	0.13104	61989	5.75331e-07	4	0.0032585	missense_variant	MODERATE
	ALT	12:21179006:G:A	8.76732	-5.02369	22.5583	0.21276	61987	5.75071e-07	4	0.00325855	missense_variant	MODERATE
	ALT	12:21178992:G:T	7.07824	-6.71239	20.8689	0.31442	61989	5.75331e-07	4	0.0032585	missense_variant	MODERATE
	ALT	12:21197068:A:C	-5.74961	-19.5425	8.04323	0.413911	61992	2.27349e-05	4	0.00325834	missense_variant	MODERATE
	ALT	12:21176813:G:GA	-5.48451	-19.2795	8.31044	0.435838	61966	0.000233557	4	0.00325966	frameshift_variant	HIGH
	ALT	12:21172740:T:C	-2.16186	-15.9526	11.6288	0.758652	61992	5.74967e-07	4	0.00325834	missense_variant	MODERATE
	ALT	12:21239083:A:G	-0.944526	-14.7354	12.8463	0.893214	61980	5.74132e-07	4	0.00325897	missense_variant	MODERATE
	ALT	12:21174668:T:G	-0.935944	-14.7267	12.8548	0.894178	61992	2.27349e-05	4	0.00325834	missense_variant	MODERATE
	Direct Bilirubin	12:21222355:C:T	2.38407	1.33015	3.43799	9.27785e-06	60802	0.00262244	66	0.054634	stop_gained	HIGH
	Direct Bilirubin	12:21222349:G:A	0.122597	-1.15657	1.40177	0.850996	56972	0.00016256	44	0.0388741	missense_variant	MODERATE
	Direct Bilirubin	12:21178996:G:A	2.76454	1.37588	4.1532	9.552e-05	61770	4.75152e-05	38	0.0309598	missense_variant	MODERATE
	Direct Bilirubin	12:21174667:T:C	0.295849	-1.11184	1.70354	0.680395	61781	0.000116562	38	0.0309542	missense_variant	MODERATE
	Direct Bilirubin	12:21217194:C:T	0.274924	-1.43736	1.98721	0.752992	61780	4.80286e-07	25	0.0203649	missense_variant	MODERATE
	Direct Bilirubin	12:21224840:G:A	3.8906	1.97683	5.80436	6.7676e-05	61668	0.000183338	19	0.0155059	splice_donor_variant	HIGH
	Direct Bilirubin	12:21141639:G:C	-0.93552	-2.95329	1.08225	0.363494	61777	1.97592e-05	18	0.0146635	missense_variant	MODERATE
	Direct Bilirubin	12:21202677:C:A	2.14588	0.0056076	4.28616	0.0494031	61776	1.59587e-05	17	0.0138491	missense_variant	MODERATE
	Direct Bilirubin	12:21202674:T:G	0.986171	-1.09014	3.06248	0.351895	61778	4.20326e-06	17	0.0138486	missense_variant	MODERATE
	Direct Bilirubin	12:21239025:G:C	1.41046	-0.800706	3.62162	0.211215	61772	9.12776e-06	15	0.0122206	missense_variant	MODERATE
	Direct Bilirubin	12:21202664:G:A	0.595761	-1.61442	2.80594	0.597277	61779	6.20166e-06	15	0.0122192	missense_variant	MODERATE
	Direct Bilirubin	12:21202555:C:G	1.05976	-1.22841	3.34793	0.364005	61779	6.20394e-06	14	0.0114046	missense_variant	MODERATE
	Direct Bilirubin	12:21224839:C:T	3.03078	0.742504	5.31905	0.00943426	61727	4.06458e-05	13	0.0105989	missense_variant,splice_region_variant	MODERATE
	Direct Bilirubin	12:21224803:G:A	-1.71478	-4.29631	0.866741	0.192944	61776	0.000349415	11	0.00896116	missense_variant	MODERATE
	Direct Bilirubin	12:21239091:G:C	1.63714	-0.943476	4.21776	0.213717	61776	4.27227e-07	11	0.00896116	missense_variant	MODERATE
	Direct Bilirubin	12:21178931:A:G	-0.355581	-2.93656	2.2254	0.787139	61770	3.0134e-05	11	0.00896203	missense_variant	MODERATE
	Direct Bilirubin	12:21178988:A:C	-0.146638	-2.85364	2.56036	0.915445	61779	2.50352e-05	10	0.00814611	missense_variant	MODERATE
	Direct Bilirubin	12:21172734:C:T	-0.13245	-2.83921	2.57431	0.923593	61781	2.50324e-05	10	0.00814584	missense_variant	MODERATE
	Direct Bilirubin	12:21172776:G:A	-1.18714	-4.21368	1.83939	0.442016	61781	1.52714e-05	8	0.00651667	missense_variant	MODERATE
	Direct Bilirubin	12:21141612:C:A	-0.438468	-3.46495	2.58801	0.776443	61777	4.54759e-05	8	0.0065171	missense_variant	MODERATE
	Direct Bilirubin	12:21172651:T:A	3.36431	0.129174	6.59945	0.0415282	61781	0.000321919	7	0.00570209	missense_variant,splice_region_variant	MODERATE
	Direct Bilirubin	12:21202568:G:A	3.06357	-0.171369	6.2985	0.0634341	61781	3.9788e-05	7	0.00570209	missense_variant	MODERATE
	Direct Bilirubin	12:21239030:ATATAT:A	1.41068	-1.82522	4.64658	0.392856	61698	3.9847e-05	7	0.00570972	frameshift_variant	HIGH
	Direct Bilirubin	12:21176826:C:T	0.318273	-2.91721	3.55376	0.847113	61746	1.07422e-05	7	0.00570525	missense_variant	MODERATE
	Direct Bilirubin	12:21239079:A:G	1.72134	-1.7732	5.21589	0.33432	61772	0.000190648	6	0.00488822	missense_variant	MODERATE
	Direct Bilirubin	12:21200569:G:C	-1.61971	-5.11411	1.8747	0.363625	61781	3.41035e-05	6	0.00488751	missense_variant	MODERATE
	Direct Bilirubin	12:21197108:A:G	1.10947	-2.3846	4.60354	0.533709	61781	3.41035e-05	6	0.00488751	missense_variant	MODERATE
	Direct Bilirubin	12:21238991:G:C	-1.0341	-4.52909	2.46089	0.561967	61755	5.01647e-07	6	0.00488958	missense_variant	MODERATE
	Direct Bilirubin	12:21178603:T:C	-0.43909	-3.93366	3.05548	0.805472	61765	6.58112e-06	6	0.00488878	missense_variant	MODERATE
	Direct Bilirubin	12:21178635:C:T	-0.2597	-3.75389	3.23449	0.88418	61776	3.41043e-05	6	0.0048879	missense_variant	MODERATE
	Direct Bilirubin	12:21222346:A:G	-0.0160243	-3.51826	3.48622	0.992845	58963	7.09928e-06	6	0.00512111	missense_variant	MODERATE
	Direct Bilirubin	12:21239145:C:T	-2.67117	-6.50266	1.16033	0.171807	61781	0.000262061	5	0.00407292	missense_variant	MODERATE
	Direct Bilirubin	12:21178693:C:T	-2.07968	-5.90875	1.74938	0.287089	61775	2.84185e-05	5	0.00407332	missense_variant	MODERATE
	Direct Bilirubin	12:21196984:G:A	-1.3575	-5.18528	2.47028	0.486993	61780	3.39316e-06	5	0.00407299	missense_variant	MODERATE
	Direct Bilirubin	12:21217264:C:T	1.01865	-2.80914	4.84644	0.601954	61781	3.04297e-06	5	0.00407292	missense_variant	MODERATE
	Direct Bilirubin	12:21178687:A:G	0.713754	-3.11375	4.54126	0.714739	61778	3.39372e-06	5	0.00407312	missense_variant	MODERATE
	Direct Bilirubin	12:21172717:C:T	-0.195077	-4.02485	3.63469	0.920474	61777	3.39459e-06	5	0.00407319	missense_variant	MODERATE
	Direct Bilirubin	12:21239080:T:TC	-0.0176987	-3.84662	3.81122	0.992771	61769	2.84203e-05	5	0.00407372	frameshift_variant	HIGH
	Direct Bilirubin	12:21172740:T:C	1.88018	-2.39919	6.15956	0.389162	61781	5.74967e-07	4	0.00325834	missense_variant	MODERATE
	Direct Bilirubin	12:21200571:C:T	-1.02481	-5.3148	3.26519	0.639636	61778	5.75331e-07	4	0.0032585	missense_variant	MODERATE
	Direct Bilirubin	12:21178992:G:T	-0.846427	-5.12581	3.43295	0.69826	61778	5.75331e-07	4	0.0032585	missense_variant	MODERATE
	Direct Bilirubin	12:21174668:T:G	-0.78247	-5.06187	3.49693	0.720062	61781	2.27349e-05	4	0.00325834	missense_variant	MODERATE
	Direct Bilirubin	12:21179006:G:A	0.393497	-3.88604	4.67303	0.856981	61776	5.75071e-07	4	0.00325855	missense_variant	MODERATE
	Direct Bilirubin	12:21176813:G:GA	-0.131072	-4.41128	4.14914	0.95214	61755	0.000233557	4	0.00325966	frameshift_variant	HIGH
	Direct Bilirubin	12:21239083:A:G	0.101521	-4.17825	4.38129	0.962917	61769	5.74132e-07	4	0.00325897	missense_variant	MODERATE
	Direct Bilirubin	12:21197068:A:C	-0.0163275	-4.29642	4.26376	0.994034	61781	2.27349e-05	4	0.00325834	missense_variant	MODERATE
	CRP	12:21222355:C:T	0.22687	-0.872608	1.32635	0.685896	60897	0.00262244	66	0.054634	stop_gained	HIGH
	CRP	12:21222349:G:A	0.462597	-0.884849	1.81004	0.501017	57058	0.00016256	44	0.0388741	missense_variant	MODERATE
	CRP	12:21174667:T:C	0.182883	-1.27755	1.64331	0.806115	61873	0.000116562	38	0.0309542	missense_variant	MODERATE
	CRP	12:21178996:G:A	-0.14976	-1.61014	1.31062	0.840703	61862	4.75152e-05	38	0.0309598	missense_variant	MODERATE
	CRP	12:21217194:C:T	1.92566	0.125459	3.72586	0.0360334	61872	4.80286e-07	25	0.0203649	missense_variant	MODERATE
	CRP	12:21224840:G:A	1.18481	-0.825949	3.19557	0.248136	61759	0.000183338	19	0.0155059	splice_donor_variant	HIGH
	CRP	12:21141639:G:C	-1.19025	-3.3117	0.931194	0.27148	61869	1.97592e-05	18	0.0146635	missense_variant	MODERATE
	CRP	12:21202677:C:A	0.958877	-1.22429	3.14204	0.389319	61868	1.59587e-05	17	0.0138491	missense_variant	MODERATE
	CRP	12:21202674:T:G	-0.907563	-3.09057	1.27545	0.415162	61870	4.20326e-06	17	0.0138486	missense_variant	MODERATE
	CRP	12:21239025:G:C	-1.34219	-3.66658	0.982203	0.257733	61864	9.12776e-06	15	0.0122206	missense_variant	MODERATE
	CRP	12:21202664:G:A	-1.08738	-3.41101	1.23624	0.359032	61871	6.20166e-06	15	0.0122192	missense_variant	MODERATE
	CRP	12:21202555:C:G	-0.40137	-2.80715	2.00441	0.743671	61871	6.20394e-06	14	0.0114046	missense_variant	MODERATE
	CRP	12:21224839:C:T	0.589941	-1.81497	2.99485	0.630659	61820	4.06458e-05	13	0.0105989	missense_variant,splice_region_variant	MODERATE
	CRP	12:21178931:A:G	-1.0563	-3.76997	1.65736	0.445503	61862	3.0134e-05	11	0.00896203	missense_variant	MODERATE
	CRP	12:21224803:G:A	-1.02078	-3.73499	1.69343	0.461044	61868	0.000349415	11	0.00896116	missense_variant	MODERATE
	CRP	12:21239091:G:C	-0.914494	-3.62801	1.79902	0.508905	61868	4.27227e-07	11	0.00896116	missense_variant	MODERATE
	CRP	12:21178988:A:C	1.54483	-1.30145	4.39112	0.287424	61871	2.50352e-05	10	0.00814611	missense_variant	MODERATE
	CRP	12:21172734:C:T	-0.194412	-3.04026	2.65143	0.893485	61873	2.50324e-05	10	0.00814584	missense_variant	MODERATE
	CRP	12:21172776:G:A	0.281654	-2.90041	3.46372	0.862271	61873	1.52714e-05	8	0.00651667	missense_variant	MODERATE
	CRP	12:21141612:C:A	0.198356	-2.98366	3.38037	0.902757	61869	4.54759e-05	8	0.0065171	missense_variant	MODERATE
	CRP	12:21176826:C:T	-1.794	-5.19605	1.60804	0.301343	61838	1.07422e-05	7	0.00570525	missense_variant	MODERATE
	CRP	12:21239030:ATATAT:A	-1.23239	-4.63147	2.16668	0.477315	61790	3.9847e-05	7	0.00570972	frameshift_variant	HIGH
	CRP	12:21172651:T:A	-0.902414	-4.57647	2.77164	0.630226	61873	0.000321919	7	0.00570209	missense_variant,splice_region_variant	MODERATE
	CRP	12:21202568:G:A	-0.114444	-3.5157	3.28681	0.947418	61873	3.9788e-05	7	0.00570209	missense_variant	MODERATE
	CRP	12:21200569:G:C	2.2732	-1.40074	5.94715	0.225241	61873	3.41035e-05	6	0.00488751	missense_variant	MODERATE
	CRP	12:21239079:A:G	-1.36663	-5.04083	2.30756	0.465986	61864	0.000190648	6	0.00488822	missense_variant	MODERATE
	CRP	12:21222346:A:G	1.21101	-2.46739	4.88942	0.518751	59050	7.09928e-06	6	0.00512111	missense_variant	MODERATE
	CRP	12:21197108:A:G	0.850018	-2.8236	4.52364	0.650181	61873	3.41035e-05	6	0.00488751	missense_variant	MODERATE
	CRP	12:21178603:T:C	-0.695911	-4.37038	2.97855	0.710485	61858	6.58112e-06	6	0.00488878	missense_variant	MODERATE
	CRP	12:21238991:G:C	-0.363982	-4.03836	3.3104	0.846054	61847	5.01647e-07	6	0.00488958	missense_variant	MODERATE
	CRP	12:21178635:C:T	0.117378	-3.55608	3.79084	0.950063	61868	3.41043e-05	6	0.0048879	missense_variant	MODERATE
	CRP	12:21217264:C:T	-1.70045	-5.72491	2.32402	0.407587	61873	3.04297e-06	5	0.00407292	missense_variant	MODERATE
	CRP	12:21196984:G:A	-1.64687	-5.67133	2.3776	0.422521	61872	3.39316e-06	5	0.00407299	missense_variant	MODERATE
	CRP	12:21172717:C:T	-0.761406	-4.78786	3.26505	0.710909	61869	3.39459e-06	5	0.00407319	missense_variant	MODERATE
	CRP	12:21178687:A:G	-0.721224	-4.74556	3.30311	0.725393	61870	3.39372e-06	5	0.00407312	missense_variant	MODERATE
	CRP	12:21239145:C:T	-0.658647	-4.68708	3.36979	0.748622	61873	0.000262061	5	0.00407292	missense_variant	MODERATE
	CRP	12:21178693:C:T	-0.596487	-4.6222	3.42922	0.771502	61867	2.84185e-05	5	0.00407332	missense_variant	MODERATE
	CRP	12:21239080:T:TC	-0.302402	-4.3266	3.7218	0.882907	61861	2.84203e-05	5	0.00407372	frameshift_variant	HIGH
	CRP	12:21172740:T:C	-2.57068	-7.06993	1.92858	0.262779	61873	5.74967e-07	4	0.00325834	missense_variant	MODERATE
	CRP	12:21179006:G:A	2.27619	-2.22321	6.77559	0.321426	61868	5.75071e-07	4	0.00325855	missense_variant	MODERATE
	CRP	12:21200571:C:T	-1.21462	-5.72501	3.29577	0.597629	61870	5.75331e-07	4	0.0032585	missense_variant	MODERATE
	CRP	12:21197068:A:C	-1.18729	-5.68731	3.31272	0.605067	61873	2.27349e-05	4	0.00325834	missense_variant	MODERATE
	CRP	12:21178992:G:T	-1.01095	-5.51026	3.48837	0.659657	61870	5.75331e-07	4	0.0032585	missense_variant	MODERATE
	CRP	12:21239083:A:G	-0.84924	-5.34896	3.65048	0.711448	61861	5.74132e-07	4	0.00325897	missense_variant	MODERATE
	CRP	12:21174668:T:G	-0.392725	-4.89202	4.10658	0.864161	61873	2.27349e-05	4	0.00325834	missense_variant	MODERATE
	CRP	12:21176813:G:GA	0.0164776	-4.4848	4.51776	0.994275	61847	0.000233557	4	0.00325966	frameshift_variant	HIGH
	Cystatin c	12:21222355:C:T	0.00996456	-0.0476586	0.0675877	0.734659	61022	0.00262244	66	0.054634	stop_gained	HIGH
	Cystatin c	12:21222349:G:A	-0.00632094	-0.0766741	0.0640323	0.860218	57171	0.00016256	44	0.0388741	missense_variant	MODERATE
	Cystatin c	12:21174667:T:C	-0.0339454	-0.110173	0.0422819	0.382762	62006	0.000116562	38	0.0309542	missense_variant	MODERATE
	Cystatin c	12:21178996:G:A	0.0167577	-0.0594711	0.0929864	0.666561	61995	4.75152e-05	38	0.0309598	missense_variant	MODERATE
	Cystatin c	12:21217194:C:T	0.067181	-0.026783	0.161145	0.16112	62005	4.80286e-07	25	0.0203649	missense_variant	MODERATE
	Cystatin c	12:21224840:G:A	0.0299416	-0.0751231	0.135006	0.576461	61892	0.000183338	19	0.0155059	splice_donor_variant	HIGH
	Cystatin c	12:21141639:G:C	-0.0162998	-0.127012	0.0944122	0.772915	62002	1.97592e-05	18	0.0146635	missense_variant	MODERATE
	Cystatin c	12:21202674:T:G	0.118563	0.00462312	0.232502	0.0414017	62003	4.20326e-06	17	0.0138486	missense_variant	MODERATE
	Cystatin c	12:21202677:C:A	-0.020988	-0.134938	0.0929616	0.718097	62001	1.59587e-05	17	0.0138491	missense_variant	MODERATE
	Cystatin c	12:21202664:G:A	-0.0649182	-0.186206	0.0563698	0.29415	62004	6.20166e-06	15	0.0122192	missense_variant	MODERATE
	Cystatin c	12:21239025:G:C	-0.0257868	-0.147112	0.0955383	0.676984	61996	9.12776e-06	15	0.0122206	missense_variant	MODERATE
	Cystatin c	12:21202555:C:G	-0.0765898	-0.202159	0.048979	0.231901	62004	6.20394e-06	14	0.0114046	missense_variant	MODERATE
	Cystatin c	12:21224839:C:T	-0.0204747	-0.146054	0.105105	0.749301	61953	4.06458e-05	13	0.0105989	missense_variant,splice_region_variant	MODERATE
	Cystatin c	12:21239091:G:C	0.0710572	-0.0705756	0.21269	0.325448	62001	4.27227e-07	11	0.00896116	missense_variant	MODERATE
	Cystatin c	12:21224803:G:A	-0.0604022	-0.202071	0.0812669	0.403345	62001	0.000349415	11	0.00896116	missense_variant	MODERATE
	Cystatin c	12:21178931:A:G	-0.0534235	-0.195054	0.0882066	0.459715	61995	3.0134e-05	11	0.00896203	missense_variant	MODERATE
	Cystatin c	12:21178988:A:C	0.04883	-0.0997322	0.197392	0.519435	62004	2.50352e-05	10	0.00814611	missense_variant	MODERATE
	Cystatin c	12:21172734:C:T	-0.0382846	-0.186824	0.110255	0.613441	62006	2.50324e-05	10	0.00814584	missense_variant	MODERATE
	Cystatin c	12:21141612:C:A	-0.0751693	-0.241244	0.090905	0.375005	62002	4.54759e-05	8	0.0065171	missense_variant	MODERATE
	Cystatin c	12:21172776:G:A	0.00834775	-0.157742	0.174437	0.921527	62006	1.52714e-05	8	0.00651667	missense_variant	MODERATE
	Cystatin c	12:21202568:G:A	0.206089	0.0285661	0.383611	0.0228857	62006	3.9788e-05	7	0.00570209	missense_variant	MODERATE
	Cystatin c	12:21172651:T:A	-0.105641	-0.283181	0.0718996	0.24352	62006	0.000321919	7	0.00570209	missense_variant,splice_region_variant	MODERATE
	Cystatin c	12:21176826:C:T	0.0481654	-0.129401	0.225732	0.594967	61971	1.07422e-05	7	0.00570525	missense_variant	MODERATE
	Cystatin c	12:21239030:ATATAT:A	0.0213643	-0.156113	0.198842	0.81348	61923	3.9847e-05	7	0.00570972	frameshift_variant	HIGH
	Cystatin c	12:21222346:A:G	-0.124173	-0.316719	0.0683735	0.206235	59179	7.09928e-06	6	0.00512111	missense_variant	MODERATE
	Cystatin c	12:21200569:G:C	0.101586	-0.0901784	0.29335	0.299136	62006	3.41035e-05	6	0.00488751	missense_variant	MODERATE
	Cystatin c	12:21238991:G:C	-0.0464268	-0.238225	0.145371	0.635189	61980	5.01647e-07	6	0.00488958	missense_variant	MODERATE
	Cystatin c	12:21239079:A:G	-0.0423634	-0.234121	0.149395	0.665012	61997	0.000190648	6	0.00488822	missense_variant	MODERATE
	Cystatin c	12:21178635:C:T	-0.0405304	-0.232284	0.151223	0.678671	62001	3.41043e-05	6	0.0048879	missense_variant	MODERATE
	Cystatin c	12:21178603:T:C	-0.0357145	-0.227507	0.156078	0.715128	61990	6.58112e-06	6	0.00488878	missense_variant	MODERATE
	Cystatin c	12:21197108:A:G	-0.0183336	-0.21008	0.173413	0.851346	62006	3.41035e-05	6	0.00488751	missense_variant	MODERATE
	Cystatin c	12:21178693:C:T	0.333843	0.123733	0.543953	0.00184507	62000	2.84185e-05	5	0.00407332	missense_variant	MODERATE
	Cystatin c	12:21178687:A:G	-0.0897995	-0.299851	0.120252	0.402076	62003	3.39372e-06	5	0.00407312	missense_variant	MODERATE
	Cystatin c	12:21196984:G:A	-0.0528608	-0.26292	0.157199	0.621854	62005	3.39316e-06	5	0.00407299	missense_variant	MODERATE
	Cystatin c	12:21172717:C:T	-0.0281199	-0.238289	0.182049	0.793136	62002	3.39459e-06	5	0.00407319	missense_variant	MODERATE
	Cystatin c	12:21239080:T:TC	-0.0242841	-0.234392	0.185824	0.820786	61994	2.84203e-05	5	0.00407372	frameshift_variant	HIGH
	Cystatin c	12:21217264:C:T	-0.00714579	-0.217206	0.202914	0.946841	62006	3.04297e-06	5	0.00407292	missense_variant	MODERATE
	Cystatin c	12:21239145:C:T	0.00512471	-0.205141	0.21539	0.9619	62006	0.000262061	5	0.00407292	missense_variant	MODERATE
	Cystatin c	12:21200571:C:T	0.130312	-0.105098	0.365722	0.277943	62003	5.75331e-07	4	0.0032585	missense_variant	MODERATE
	Cystatin c	12:21197068:A:C	-0.0821749	-0.317054	0.152705	0.492889	62006	2.27349e-05	4	0.00325834	missense_variant	MODERATE
	Cystatin c	12:21174668:T:G	0.0727314	-0.162111	0.307574	0.543841	62006	2.27349e-05	4	0.00325834	missense_variant	MODERATE
	Cystatin c	12:21172740:T:C	-0.0530184	-0.287861	0.181824	0.658134	62006	5.74967e-07	4	0.00325834	missense_variant	MODERATE
	Cystatin c	12:21178992:G:T	0.0468539	-0.18799	0.281697	0.695768	62003	5.75331e-07	4	0.0032585	missense_variant	MODERATE
	Cystatin c	12:21179006:G:A	-0.0447246	-0.279576	0.190126	0.708957	62001	5.75071e-07	4	0.00325855	missense_variant	MODERATE
	Cystatin c	12:21239083:A:G	-0.0429702	-0.277829	0.191888	0.719891	61994	5.74132e-07	4	0.00325897	missense_variant	MODERATE
	Cystatin c	12:21176813:G:GA	-0.0422013	-0.277113	0.192711	0.724758	61980	0.000233557	4	0.00325966	frameshift_variant	HIGH
	hba1c	12:21222355:C:T	2.14741	-0.314382	4.60919	0.0873266	61031	0.00262244	66	0.054634	stop_gained	HIGH
	hba1c	12:21222349:G:A	0.23376	-2.77404	3.24156	0.878929	57170	0.00016256	44	0.0388741	missense_variant	MODERATE
	hba1c	12:21174667:T:C	-2.09842	-5.42557	1.22874	0.216403	62019	0.000116562	38	0.0309542	missense_variant	MODERATE
	hba1c	12:21178996:G:A	-1.4605	-4.78777	1.86677	0.389606	62007	4.75152e-05	38	0.0309598	missense_variant	MODERATE
	hba1c	12:21217194:C:T	0.337499	-3.43493	4.10993	0.860805	62018	4.80286e-07	25	0.0203649	missense_variant	MODERATE
	hba1c	12:21224840:G:A	3.53258	-1.31	8.37515	0.152783	61908	0.000183338	19	0.0155059	splice_donor_variant	HIGH
	hba1c	12:21141639:G:C	-0.306871	-5.14749	4.53375	0.901114	62015	1.97592e-05	18	0.0146635	missense_variant	MODERATE
	hba1c	12:21202677:C:A	-0.82543	-5.53011	3.87925	0.730938	62014	1.59587e-05	17	0.0138491	missense_variant	MODERATE
	hba1c	12:21202674:T:G	0.724983	-4.42804	5.87801	0.782738	62015	4.20326e-06	17	0.0138486	missense_variant	MODERATE
	hba1c	12:21239025:G:C	3.64562	-1.34583	8.63708	0.152283	62008	9.12776e-06	15	0.0122206	missense_variant	MODERATE
	hba1c	12:21202664:G:A	-1.82025	-6.97316	3.33265	0.48871	62017	6.20166e-06	15	0.0122192	missense_variant	MODERATE
	hba1c	12:21202555:C:G	-1.50933	-6.66307	3.64442	0.565966	62017	6.20394e-06	14	0.0114046	missense_variant	MODERATE
	hba1c	12:21224839:C:T	-2.96122	-8.72323	2.80078	0.3138	61966	4.06458e-05	13	0.0105989	missense_variant,splice_region_variant	MODERATE
	hba1c	12:21239091:G:C	4.72802	-1.03303	10.4891	0.107721	62014	4.27227e-07	11	0.00896116	missense_variant	MODERATE
	hba1c	12:21178931:A:G	2.59652	-4.05542	9.24846	0.444235	62007	3.0134e-05	11	0.00896203	missense_variant	MODERATE
	hba1c	12:21224803:G:A	0.04434	-6.26789	6.35657	0.989015	62013	0.000349415	11	0.00896116	missense_variant	MODERATE
	hba1c	12:21172734:C:T	4.77719	-1.53337	11.0878	0.13788	62019	2.50324e-05	10	0.00814584	missense_variant	MODERATE
	hba1c	12:21178988:A:C	1.62198	-5.03115	8.27511	0.632772	62017	2.50352e-05	10	0.00814611	missense_variant	MODERATE
	hba1c	12:21172776:G:A	-4.02646	-10.6794	2.62648	0.235539	62019	1.52714e-05	8	0.00651667	missense_variant	MODERATE
	hba1c	12:21141612:C:A	-1.35624	-8.89924	6.18675	0.724531	62015	4.54759e-05	8	0.0065171	missense_variant	MODERATE
	hba1c	12:21172651:T:A	-6.84149	-14.3841	0.701165	0.0754419	62019	0.000321919	7	0.00570209	missense_variant,splice_region_variant	MODERATE
	hba1c	12:21239030:ATATAT:A	-3.97441	-11.0307	3.08185	0.269614	61933	3.9847e-05	7	0.00570972	frameshift_variant	HIGH
	hba1c	12:21176826:C:T	-3.52114	-11.0629	4.02062	0.360145	61983	1.07422e-05	7	0.00570525	missense_variant	MODERATE
	hba1c	12:21202568:G:A	1.36368	-6.17861	8.90597	0.723057	62019	3.9788e-05	7	0.00570209	missense_variant	MODERATE
	hba1c	12:21238991:G:C	4.57539	-3.57108	12.7219	0.270981	61994	5.01647e-07	6	0.00488958	missense_variant	MODERATE
	hba1c	12:21222346:A:G	3.80635	-3.75825	11.3709	0.324024	59200	7.09928e-06	6	0.00512111	missense_variant	MODERATE
	hba1c	12:21239079:A:G	-4.24306	-13.1682	4.68204	0.351444	62009	0.000190648	6	0.00488822	missense_variant	MODERATE
	hba1c	12:21178635:C:T	-3.23307	-11.3791	4.91297	0.43663	62014	3.41043e-05	6	0.0048879	missense_variant	MODERATE
	hba1c	12:21178603:T:C	-3.37893	-12.3049	5.547	0.458113	62003	6.58112e-06	6	0.00488878	missense_variant	MODERATE
	hba1c	12:21197108:A:G	2.44291	-5.70336	10.5892	0.556691	62019	3.41035e-05	6	0.00488751	missense_variant	MODERATE
	hba1c	12:21200569:G:C	0.106901	-7.43628	7.65008	0.97784	62019	3.41035e-05	6	0.00488751	missense_variant	MODERATE
	hba1c	12:21196984:G:A	5.12538	-3.79886	14.0496	0.26031	62018	3.39316e-06	5	0.00407299	missense_variant	MODERATE
	hba1c	12:21239080:T:TC	-3.64658	-15.1661	7.87295	0.534964	62006	2.84203e-05	5	0.00407372	frameshift_variant	HIGH
	hba1c	12:21178693:C:T	-2.77216	-11.6987	6.15441	0.542738	62012	2.84185e-05	5	0.00407332	missense_variant	MODERATE
	hba1c	12:21239145:C:T	-2.68917	-11.6223	6.24395	0.555176	62019	0.000262061	5	0.00407292	missense_variant	MODERATE
	hba1c	12:21178687:A:G	-2.4959	-11.4198	6.42802	0.583566	62016	3.39372e-06	5	0.00407312	missense_variant	MODERATE
	hba1c	12:21172717:C:T	2.46143	-6.46775	11.3906	0.588995	62015	3.39459e-06	5	0.00407319	missense_variant	MODERATE
	hba1c	12:21217264:C:T	1.11531	-7.03199	9.2626	0.788462	62019	3.04297e-06	5	0.00407292	missense_variant	MODERATE
	hba1c	12:21239083:A:G	10.2261	-1.29491	21.7471	0.0819158	62006	5.74132e-07	4	0.00325897	missense_variant	MODERATE
	hba1c	12:21179006:G:A	6.72348	-4.79707	18.244	0.252682	62014	5.75071e-07	4	0.00325855	missense_variant	MODERATE
	hba1c	12:21178992:G:T	-3.82182	-13.7986	6.15499	0.452765	62016	5.75331e-07	4	0.0032585	missense_variant	MODERATE
	hba1c	12:21172740:T:C	2.96612	-8.55431	14.4866	0.613818	62019	5.74967e-07	4	0.00325834	missense_variant	MODERATE
	hba1c	12:21176813:G:GA	-1.02214	-11.0035	8.95923	0.840923	61993	0.000233557	4	0.00325966	frameshift_variant	HIGH
	hba1c	12:21200571:C:T	-0.67365	-10.6756	9.32825	0.894977	62015	5.75331e-07	4	0.0032585	missense_variant	MODERATE
	hba1c	12:21197068:A:C	0.0132098	-9.96556	9.99198	0.99793	62019	2.27349e-05	4	0.00325834	missense_variant	MODERATE
	hba1c	12:21174668:T:G	0.0112838	-8.91305	8.93561	0.998023	62019	2.27349e-05	4	0.00325834	missense_variant	MODERATE
	Vitamin D	12:21222355:C:T	-1.62182	-6.73049	3.48685	0.533793	60408	0.00262244	66	0.054634	stop_gained	HIGH
	Vitamin D	12:21222349:G:A	-3.98308	-10.238	2.27187	0.211998	56598	0.00016256	44	0.0388741	missense_variant	MODERATE
	Vitamin D	12:21174667:T:C	-2.96867	-9.70509	3.76776	0.387728	61387	0.000116562	38	0.0309542	missense_variant	MODERATE
	Vitamin D	12:21178996:G:A	2.87086	-3.86534	9.60705	0.403541	61376	4.75152e-05	38	0.0309598	missense_variant	MODERATE
	Vitamin D	12:21217194:C:T	2.23659	-6.06719	10.5404	0.597558	61386	4.80286e-07	25	0.0203649	missense_variant	MODERATE
	Vitamin D	12:21224840:G:A	1.54283	-7.98046	11.0661	0.750841	61273	0.000183338	19	0.0155059	splice_donor_variant	HIGH
	Vitamin D	12:21141639:G:C	1.70566	-8.07977	11.4911	0.732623	61383	1.97592e-05	18	0.0146635	missense_variant	MODERATE
	Vitamin D	12:21202674:T:G	-3.81361	-13.8829	6.25565	0.457892	61384	4.20326e-06	17	0.0138486	missense_variant	MODERATE
	Vitamin D	12:21202677:C:A	1.29564	-8.77429	11.3656	0.800901	61382	1.59587e-05	17	0.0138491	missense_variant	MODERATE
	Vitamin D	12:21239025:G:C	-2.59213	-13.3153	8.13107	0.63565	61378	9.12776e-06	15	0.0122206	missense_variant	MODERATE
	Vitamin D	12:21202664:G:A	-1.14316	-11.8618	9.57546	0.83442	61385	6.20166e-06	15	0.0122192	missense_variant	MODERATE
	Vitamin D	12:21202555:C:G	4.23126	-6.86568	15.3282	0.454857	61385	6.20394e-06	14	0.0114046	missense_variant	MODERATE
	Vitamin D	12:21224839:C:T	-5.80616	-17.3197	5.70743	0.322959	61333	4.06458e-05	13	0.0105989	missense_variant,splice_region_variant	MODERATE
	Vitamin D	12:21178931:A:G	6.29322	-6.223	18.8094	0.324383	61376	3.0134e-05	11	0.00896203	missense_variant	MODERATE
	Vitamin D	12:21224803:G:A	0.946595	-11.5718	13.465	0.882179	61382	0.000349415	11	0.00896116	missense_variant	MODERATE
	Vitamin D	12:21239091:G:C	-0.282404	-12.7982	12.2334	0.964725	61382	4.27227e-07	11	0.00896116	missense_variant	MODERATE
	Vitamin D	12:21172734:C:T	7.38866	-5.73805	20.5154	0.269932	61387	2.50324e-05	10	0.00814584	missense_variant	MODERATE
	Vitamin D	12:21178988:A:C	-4.69184	-17.8209	8.43721	0.48366	61385	2.50352e-05	10	0.00814611	missense_variant	MODERATE
	Vitamin D	12:21141612:C:A	-3.22312	-17.9	11.4537	0.666887	61383	4.54759e-05	8	0.0065171	missense_variant	MODERATE
	Vitamin D	12:21172776:G:A	-0.806818	-15.4846	13.8709	0.914203	61387	1.52714e-05	8	0.00651667	missense_variant	MODERATE
	Vitamin D	12:21239030:ATATAT:A	-9.96983	-25.6569	5.71722	0.212891	61305	3.9847e-05	7	0.00570972	frameshift_variant	HIGH
	Vitamin D	12:21172651:T:A	-6.72934	-22.4191	8.96042	0.400551	61387	0.000321919	7	0.00570209	missense_variant,splice_region_variant	MODERATE
	Vitamin D	12:21202568:G:A	-1.9464	-17.6351	13.7423	0.807879	61387	3.9788e-05	7	0.00570209	missense_variant	MODERATE
	Vitamin D	12:21176826:C:T	-0.173763	-15.8662	15.5186	0.982685	61353	1.07422e-05	7	0.00570525	missense_variant	MODERATE
	Vitamin D	12:21200569:G:C	-17.6504	-34.5966	-0.704113	0.0412116	61387	3.41035e-05	6	0.00488751	missense_variant	MODERATE
	Vitamin D	12:21222346:A:G	-17.0755	-34.0151	-0.136035	0.0481889	58587	7.09928e-06	6	0.00512111	missense_variant	MODERATE
	Vitamin D	12:21238991:G:C	-6.53465	-23.4822	10.4129	0.449809	61361	5.01647e-07	6	0.00488958	missense_variant	MODERATE
	Vitamin D	12:21239079:A:G	2.88362	-14.0627	19.8299	0.738745	61378	0.000190648	6	0.00488822	missense_variant	MODERATE
	Vitamin D	12:21178603:T:C	2.62795	-14.3195	19.5754	0.761184	61371	6.58112e-06	6	0.00488878	missense_variant	MODERATE
	Vitamin D	12:21197108:A:G	1.69046	-15.2546	18.6355	0.844978	61387	3.41035e-05	6	0.00488751	missense_variant	MODERATE
	Vitamin D	12:21178635:C:T	-0.774946	-17.72	16.1701	0.928577	61382	3.41043e-05	6	0.0048879	missense_variant	MODERATE
	Vitamin D	12:21172717:C:T	14.9365	-3.63659	33.5096	0.114977	61383	3.39459e-06	5	0.00407319	missense_variant	MODERATE
	Vitamin D	12:21196984:G:A	-10.4061	-28.9694	8.15724	0.271894	61386	3.39316e-06	5	0.00407299	missense_variant	MODERATE
	Vitamin D	12:21217264:C:T	-10.2924	-28.8557	8.2709	0.277165	61387	3.04297e-06	5	0.00407292	missense_variant	MODERATE
	Vitamin D	12:21239145:C:T	9.38648	-9.19528	27.9682	0.322137	61387	0.000262061	5	0.00407292	missense_variant	MODERATE
	Vitamin D	12:21178693:C:T	7.11477	-11.4532	25.6828	0.452643	61381	2.84185e-05	5	0.00407332	missense_variant	MODERATE
	Vitamin D	12:21239080:T:TC	5.03511	-13.5347	23.6049	0.595113	61375	2.84203e-05	5	0.00407372	frameshift_variant	HIGH
	Vitamin D	12:21178687:A:G	4.25728	-14.3049	22.8195	0.65305	61384	3.39372e-06	5	0.00407312	missense_variant	MODERATE
	Vitamin D	12:21179006:G:A	-18.5181	-39.2713	2.2351	0.0803116	61383	5.75071e-07	4	0.00325855	missense_variant	MODERATE
	Vitamin D	12:21172740:T:C	17.7124	-3.04072	38.4656	0.094367	61387	5.74967e-07	4	0.00325834	missense_variant	MODERATE
	Vitamin D	12:21197068:A:C	15.3194	-5.4372	36.076	0.14802	61387	2.27349e-05	4	0.00325834	missense_variant	MODERATE
	Vitamin D	12:21178992:G:T	12.7451	-8.00763	33.4978	0.228704	61384	5.75331e-07	4	0.0032585	missense_variant	MODERATE
	Vitamin D	12:21200571:C:T	6.6018	-14.203	27.4066	0.533978	61384	5.75331e-07	4	0.0032585	missense_variant	MODERATE
	Vitamin D	12:21239083:A:G	4.05672	-16.6962	24.8096	0.701621	61375	5.74132e-07	4	0.00325897	missense_variant	MODERATE
	Vitamin D	12:21174668:T:G	0.701608	-20.052	21.4552	0.94717	61387	2.27349e-05	4	0.00325834	missense_variant	MODERATE
	Vitamin D	12:21176813:G:GA	-0.335788	-21.0951	20.4235	0.974709	61362	0.000233557	4	0.00325966	frameshift_variant	HIGH

## Sheet: Table S10
	Table S10- Variant Effect Predicter for SLCO1B1 gene
	For further information: https://www.ensembl.org/info/docs/tools/vep/index.html (1 Feb 2023)
	#Uploaded_variation	Location	Allele	Gene	Feature	Feature_type	Consequence	cDNA_position	CDS_position	Protein_position	Amino_acids	Codons	Existing_variation	IMPACT	DISTANCE	STRAND	FLAGS	VARIANT_CLASS	SYMBOL	SYMBOL_SOURCE	HGNC_ID	BIOTYPE	CANONICAL	MANE_SELECT	MANE_PLUS_CLINICAL	TSL	APPRIS	CCDS	ENSP	SWISSPROT	TREMBL	UNIPARC	UNIPROT_ISOFORM	SOURCE	GENE_PHENO	SIFT	PolyPhen	EXON	INTRON	DOMAINS	miRNA	HGVSc	HGVSp	HGVS_OFFSET	AF	AFR_AF	AMR_AF	EAS_AF	EUR_AF
	12:21141475:G:T	chr12:21141475	T	ENSG00000134538	ENST00000256958	Transcript	intron_variant	-	-	-	-	-	-	MODIFIER	-	1	-	SNV	SLCO1B1	HGNC	HGNC:10959	protein_coding	YES	NM_006446.5	-	1	P1	CCDS8685.1	ENSP00000256958	Q9Y6L6.181	A0A024RAU7.41	UPI0000043BED	-	-	1	-	-	-	2023-01-14	-	-	ENST00000256958.3:c.-61-39G>T	-	-	-	-	-	-	-
	12:21141482:T:C	chr12:21141482	C	ENSG00000134538	ENST00000256958	Transcript	intron_variant	-	-	-	-	-	rs756740126	MODIFIER	-	1	-	SNV	SLCO1B1	HGNC	HGNC:10959	protein_coding	YES	NM_006446.5	-	1	P1	CCDS8685.1	ENSP00000256958	Q9Y6L6.181	A0A024RAU7.41	UPI0000043BED	-	-	1	-	-	-	2023-01-14	-	-	ENST00000256958.3:c.-61-32T>C	-	-	-	-	-	-	-
	12:21141486:ATAAAC:A	chr12:21141487-21141491	-	ENSG00000134538	ENST00000256958	Transcript	intron_variant	-	-	-	-	-	rs1202529529	MODIFIER	-	1	-	deletion	SLCO1B1	HGNC	HGNC:10959	protein_coding	YES	NM_006446.5	-	1	P1	CCDS8685.1	ENSP00000256958	Q9Y6L6.181	A0A024RAU7.41	UPI0000043BED	-	-	1	-	-	-	2023-01-14	-	-	ENST00000256958.3:c.-61-25_-61-21del	-	-	-	-	-	-	-
	12:21141489:A:G	chr12:21141489	G	ENSG00000134538	ENST00000256958	Transcript	intron_variant	-	-	-	-	-	-	MODIFIER	-	1	-	SNV	SLCO1B1	HGNC	HGNC:10959	protein_coding	YES	NM_006446.5	-	1	P1	CCDS8685.1	ENSP00000256958	Q9Y6L6.181	A0A024RAU7.41	UPI0000043BED	-	-	1	-	-	-	2023-01-14	-	-	ENST00000256958.3:c.-61-25A>G	-	-	-	-	-	-	-
	12:21141491:C:A	chr12:21141491	A	ENSG00000134538	ENST00000256958	Transcript	intron_variant	-	-	-	-	-	-	MODIFIER	-	1	-	SNV	SLCO1B1	HGNC	HGNC:10959	protein_coding	YES	NM_006446.5	-	1	P1	CCDS8685.1	ENSP00000256958	Q9Y6L6.181	A0A024RAU7.41	UPI0000043BED	-	-	1	-	-	-	2023-01-14	-	-	ENST00000256958.3:c.-61-23C>A	-	-	-	-	-	-	-
	12:21141494:T:C	chr12:21141494	C	ENSG00000134538	ENST00000256958	Transcript	intron_variant	-	-	-	-	-	rs779656339	MODIFIER	-	1	-	SNV	SLCO1B1	HGNC	HGNC:10959	protein_coding	YES	NM_006446.5	-	1	P1	CCDS8685.1	ENSP00000256958	Q9Y6L6.181	A0A024RAU7.41	UPI0000043BED	-	-	1	-	-	-	2023-01-14	-	-	ENST00000256958.3:c.-61-20T>C	-	-	-	-	-	-	-
	12:21141495:A:G	chr12:21141495	G	ENSG00000134538	ENST00000256958	Transcript	intron_variant	-	-	-	-	-	-	MODIFIER	-	1	-	SNV	SLCO1B1	HGNC	HGNC:10959	protein_coding	YES	NM_006446.5	-	1	P1	CCDS8685.1	ENSP00000256958	Q9Y6L6.181	A0A024RAU7.41	UPI0000043BED	-	-	1	-	-	-	2023-01-14	-	-	ENST00000256958.3:c.-61-19A>G	-	-	-	-	-	-	-
	12:21141497:T:A	chr12:21141497	A	ENSG00000134538	ENST00000256958	Transcript	intron_variant	-	-	-	-	-	-	MODIFIER	-	1	-	SNV	SLCO1B1	HGNC	HGNC:10959	protein_coding	YES	NM_006446.5	-	1	P1	CCDS8685.1	ENSP00000256958	Q9Y6L6.181	A0A024RAU7.41	UPI0000043BED	-	-	1	-	-	-	2023-01-14	-	-	ENST00000256958.3:c.-61-17T>A	-	-	-	-	-	-	-
	12:21141511:T:C	chr12:21141511	C	ENSG00000134538	ENST00000256958	Transcript	splice_region_variant,intron_variant	-	-	-	-	-	rs749097006	LOW	-	1	-	SNV	SLCO1B1	HGNC	HGNC:10959	protein_coding	YES	NM_006446.5	-	1	P1	CCDS8685.1	ENSP00000256958	Q9Y6L6.181	A0A024RAU7.41	UPI0000043BED	-	-	1	-	-	-	2023-01-14	-	-	ENST00000256958.3:c.-61-3T>C	-	-	-	-	-	-	-
	12:21141518:T:C	chr12:21141518	C	ENSG00000134538	ENST00000256958	Transcript	5_prime_UTR_variant	48	-	-	-	-	rs755224225	MODIFIER	-	1	-	SNV	SLCO1B1	HGNC	HGNC:10959	protein_coding	YES	NM_006446.5	-	1	P1	CCDS8685.1	ENSP00000256958	Q9Y6L6.181	A0A024RAU7.41	UPI0000043BED	-	-	1	-	-	2023-02-15	-	-	-	ENST00000256958.3:c.-57T>C	-	-	-	-	-	-	-
	12:21141520:GTT:G	chr12:21141521-21141522	-	ENSG00000134538	ENST00000256958	Transcript	5_prime_UTR_variant	51-52	-	-	-	-	-	MODIFIER	-	1	-	deletion	SLCO1B1	HGNC	HGNC:10959	protein_coding	YES	NM_006446.5	-	1	P1	CCDS8685.1	ENSP00000256958	Q9Y6L6.181	A0A024RAU7.41	UPI0000043BED	-	-	1	-	-	2023-02-15	-	-	-	ENST00000256958.3:c.-53_-52del	-	-	-	-	-	-	-
	12:21141528:C:A	chr12:21141528	A	ENSG00000134538	ENST00000256958	Transcript	5_prime_UTR_variant	58	-	-	-	-	COSV99919156	MODIFIER	-	1	-	SNV	SLCO1B1	HGNC	HGNC:10959	protein_coding	YES	NM_006446.5	-	1	P1	CCDS8685.1	ENSP00000256958	Q9Y6L6.181	A0A024RAU7.41	UPI0000043BED	-	-	1	-	-	2023-02-15	-	-	-	ENST00000256958.3:c.-47C>A	-	-	-	-	-	-	-
	12:21141530:G:A	chr12:21141530	A	ENSG00000134538	ENST00000256958	Transcript	5_prime_UTR_variant	60	-	-	-	-	COSV99919087	MODIFIER	-	1	-	SNV	SLCO1B1	HGNC	HGNC:10959	protein_coding	YES	NM_006446.5	-	1	P1	CCDS8685.1	ENSP00000256958	Q9Y6L6.181	A0A024RAU7.41	UPI0000043BED	-	-	1	-	-	2023-02-15	-	-	-	ENST00000256958.3:c.-45G>A	-	-	-	-	-	-	-
	12:21141532:G:A	chr12:21141532	A	ENSG00000134538	ENST00000256958	Transcript	5_prime_UTR_variant	62	-	-	-	-	rs748259319	MODIFIER	-	1	-	SNV	SLCO1B1	HGNC	HGNC:10959	protein_coding	YES	NM_006446.5	-	1	P1	CCDS8685.1	ENSP00000256958	Q9Y6L6.181	A0A024RAU7.41	UPI0000043BED	-	-	1	-	-	2023-02-15	-	-	-	ENST00000256958.3:c.-43G>A	-	-	-	-	-	-	-
	12:21141532:G:T	chr12:21141532	T	ENSG00000134538	ENST00000256958	Transcript	5_prime_UTR_variant	62	-	-	-	-	-	MODIFIER	-	1	-	SNV	SLCO1B1	HGNC	HGNC:10959	protein_coding	YES	NM_006446.5	-	1	P1	CCDS8685.1	ENSP00000256958	Q9Y6L6.181	A0A024RAU7.41	UPI0000043BED	-	-	1	-	-	2023-02-15	-	-	-	ENST00000256958.3:c.-43G>T	-	-	-	-	-	-	-
	12:21141533:C:T	chr12:21141533	T	ENSG00000134538	ENST00000256958	Transcript	5_prime_UTR_variant	63	-	-	-	-	rs772237554	MODIFIER	-	1	-	SNV	SLCO1B1	HGNC	HGNC:10959	protein_coding	YES	NM_006446.5	-	1	P1	CCDS8685.1	ENSP00000256958	Q9Y6L6.181	A0A024RAU7.41	UPI0000043BED	-	-	1	-	-	2023-02-15	-	-	-	ENST00000256958.3:c.-42C>T	-	-	-	-	-	-	-
	12:21141535:T:TCAA	chr12:21141535-21141536	CAA	ENSG00000134538	ENST00000256958	Transcript	5_prime_UTR_variant	65-66	-	-	-	-	-	MODIFIER	-	1	-	insertion	SLCO1B1	HGNC	HGNC:10959	protein_coding	YES	NM_006446.5	-	1	P1	CCDS8685.1	ENSP00000256958	Q9Y6L6.181	A0A024RAU7.41	UPI0000043BED	-	-	1	-	-	2023-02-15	-	-	-	ENST00000256958.3:c.-33_-31dup	-	-	-	-	-	-	-
	12:21141539:CA:C	chr12:21141540	-	ENSG00000134538	ENST00000256958	Transcript	5_prime_UTR_variant	70	-	-	-	-	-	MODIFIER	-	1	-	deletion	SLCO1B1	HGNC	HGNC:10959	protein_coding	YES	NM_006446.5	-	1	P1	CCDS8685.1	ENSP00000256958	Q9Y6L6.181	A0A024RAU7.41	UPI0000043BED	-	-	1	-	-	2023-02-15	-	-	-	ENST00000256958.3:c.-34del	-	-	-	-	-	-	-
	12:21141540:A:C	chr12:21141540	C	ENSG00000134538	ENST00000256958	Transcript	5_prime_UTR_variant	70	-	-	-	-	-	MODIFIER	-	1	-	SNV	SLCO1B1	HGNC	HGNC:10959	protein_coding	YES	NM_006446.5	-	1	P1	CCDS8685.1	ENSP00000256958	Q9Y6L6.181	A0A024RAU7.41	UPI0000043BED	-	-	1	-	-	2023-02-15	-	-	-	ENST00000256958.3:c.-35A>C	-	-	-	-	-	-	-
	12:21141545:A:C	chr12:21141545	C	ENSG00000134538	ENST00000256958	Transcript	5_prime_UTR_variant	75	-	-	-	-	rs773859906	MODIFIER	-	1	-	SNV	SLCO1B1	HGNC	HGNC:10959	protein_coding	YES	NM_006446.5	-	1	P1	CCDS8685.1	ENSP00000256958	Q9Y6L6.181	A0A024RAU7.41	UPI0000043BED	-	-	1	-	-	2023-02-15	-	-	-	ENST00000256958.3:c.-30A>C	-	-	-	-	-	-	-
	12:21141548:C:T	chr12:21141548	T	ENSG00000134538	ENST00000256958	Transcript	5_prime_UTR_variant	78	-	-	-	-	rs1304246132,COSV57014920	MODIFIER	-	1	-	SNV	SLCO1B1	HGNC	HGNC:10959	protein_coding	YES	NM_006446.5	-	1	P1	CCDS8685.1	ENSP00000256958	Q9Y6L6.181	A0A024RAU7.41	UPI0000043BED	-	-	1	-	-	2023-02-15	-	-	-	ENST00000256958.3:c.-27C>T	-	-	-	-	-	-	-
	12:21141549:AT:A	chr12:21141550	-	ENSG00000134538	ENST00000256958	Transcript	5_prime_UTR_variant	80	-	-	-	-	rs1347154794	MODIFIER	-	1	-	deletion	SLCO1B1	HGNC	HGNC:10959	protein_coding	YES	NM_006446.5	-	1	P1	CCDS8685.1	ENSP00000256958	Q9Y6L6.181	A0A024RAU7.41	UPI0000043BED	-	-	1	-	-	2023-02-15	-	-	-	ENST00000256958.3:c.-23del	-	-	-	-	-	-	-
	12:21141553:G:T	chr12:21141553	T	ENSG00000134538	ENST00000256958	Transcript	5_prime_UTR_variant	83	-	-	-	-	-	MODIFIER	-	1	-	SNV	SLCO1B1	HGNC	HGNC:10959	protein_coding	YES	NM_006446.5	-	1	P1	CCDS8685.1	ENSP00000256958	Q9Y6L6.181	A0A024RAU7.41	UPI0000043BED	-	-	1	-	-	2023-02-15	-	-	-	ENST00000256958.3:c.-22G>T	-	-	-	-	-	-	-
	12:21141555:A:G	chr12:21141555	G	ENSG00000134538	ENST00000256958	Transcript	5_prime_UTR_variant	85	-	-	-	-	rs999771726,COSV57008062,COSV99919362	MODIFIER	-	1	-	SNV	SLCO1B1	HGNC	HGNC:10959	protein_coding	YES	NM_006446.5	-	1	P1	CCDS8685.1	ENSP00000256958	Q9Y6L6.181	A0A024RAU7.41	UPI0000043BED	-	-	1	-	-	2023-02-15	-	-	-	ENST00000256958.3:c.-20A>G	-	-	-	-	-	-	-
	12:21141556:T:C	chr12:21141556	C	ENSG00000134538	ENST00000256958	Transcript	5_prime_UTR_variant	86	-	-	-	-	rs1288383635	MODIFIER	-	1	-	SNV	SLCO1B1	HGNC	HGNC:10959	protein_coding	YES	NM_006446.5	-	1	P1	CCDS8685.1	ENSP00000256958	Q9Y6L6.181	A0A024RAU7.41	UPI0000043BED	-	-	1	-	-	2023-02-15	-	-	-	ENST00000256958.3:c.-19T>C	-	-	-	-	-	-	-
	12:21141558:A:G	chr12:21141558	G	ENSG00000134538	ENST00000256958	Transcript	5_prime_UTR_variant	88	-	-	-	-	-	MODIFIER	-	1	-	SNV	SLCO1B1	HGNC	HGNC:10959	protein_coding	YES	NM_006446.5	-	1	P1	CCDS8685.1	ENSP00000256958	Q9Y6L6.181	A0A024RAU7.41	UPI0000043BED	-	-	1	-	-	2023-02-15	-	-	-	ENST00000256958.3:c.-17A>G	-	-	-	-	-	-	-
	12:21141560:A:G	chr12:21141560	G	ENSG00000134538	ENST00000256958	Transcript	5_prime_UTR_variant	90	-	-	-	-	-	MODIFIER	-	1	-	SNV	SLCO1B1	HGNC	HGNC:10959	protein_coding	YES	NM_006446.5	-	1	P1	CCDS8685.1	ENSP00000256958	Q9Y6L6.181	A0A024RAU7.41	UPI0000043BED	-	-	1	-	-	2023-02-15	-	-	-	ENST00000256958.3:c.-15A>G	-	-	-	-	-	-	-
	12:21141561:T:C	chr12:21141561	C	ENSG00000134538	ENST00000256958	Transcript	5_prime_UTR_variant	91	-	-	-	-	-	MODIFIER	-	1	-	SNV	SLCO1B1	HGNC	HGNC:10959	protein_coding	YES	NM_006446.5	-	1	P1	CCDS8685.1	ENSP00000256958	Q9Y6L6.181	A0A024RAU7.41	UPI0000043BED	-	-	1	-	-	2023-02-15	-	-	-	ENST00000256958.3:c.-14T>C	-	-	-	-	-	-	-
	12:21141564:A:G	chr12:21141564	G	ENSG00000134538	ENST00000256958	Transcript	5_prime_UTR_variant	94	-	-	-	-	rs757881841	MODIFIER	-	1	-	SNV	SLCO1B1	HGNC	HGNC:10959	protein_coding	YES	NM_006446.5	-	1	P1	CCDS8685.1	ENSP00000256958	Q9Y6L6.181	A0A024RAU7.41	UPI0000043BED	-	-	1	-	-	2023-02-15	-	-	-	ENST00000256958.3:c.-11A>G	-	-	-	-	-	-	-
	12:21141572:A:C	chr12:21141572	C	ENSG00000134538	ENST00000256958	Transcript	5_prime_UTR_variant	102	-	-	-	-	rs180888034	MODIFIER	-	1	-	SNV	SLCO1B1	HGNC	HGNC:10959	protein_coding	YES	NM_006446.5	-	1	P1	CCDS8685.1	ENSP00000256958	Q9Y6L6.181	A0A024RAU7.41	UPI0000043BED	-	-	1	-	-	2023-02-15	-	-	-	ENST00000256958.3:c.-3A>C	-	-	0.0006	0	0	0.003	0
	12:21141572:A:G	chr12:21141572	G	ENSG00000134538	ENST00000256958	Transcript	5_prime_UTR_variant	102	-	-	-	-	rs180888034	MODIFIER	-	1	-	SNV	SLCO1B1	HGNC	HGNC:10959	protein_coding	YES	NM_006446.5	-	1	P1	CCDS8685.1	ENSP00000256958	Q9Y6L6.181	A0A024RAU7.41	UPI0000043BED	-	-	1	-	-	2023-02-15	-	-	-	ENST00000256958.3:c.-3A>G	-	-	-	-	-	-	-
	12:21141574:C:T	chr12:21141574	T	ENSG00000134538	ENST00000256958	Transcript	5_prime_UTR_variant	104	-	-	-	-	rs1160067856	MODIFIER	-	1	-	SNV	SLCO1B1	HGNC	HGNC:10959	protein_coding	YES	NM_006446.5	-	1	P1	CCDS8685.1	ENSP00000256958	Q9Y6L6.181	A0A024RAU7.41	UPI0000043BED	-	-	1	-	-	2023-02-15	-	-	-	ENST00000256958.3:c.-1C>T	-	-	-	-	-	-	-
	12:21141576:T:C	chr12:21141576	C	ENSG00000134538	ENST00000256958	Transcript	start_lost	106	2	1	M/T	aTg/aCg	COSV99918553	HIGH	-	1	-	SNV	SLCO1B1	HGNC	HGNC:10959	protein_coding	YES	NM_006446.5	-	1	P1	CCDS8685.1	ENSP00000256958	Q9Y6L6.181	A0A024RAU7.41	UPI0000043BED	-	-	1	deleterious(0)	benign(0.011)	2023-02-15	-	-	-	ENST00000256958.3:c.2T>C	ENSP00000256958.2:p.Met1?	-	-	-	-	-	-
	12:21141577:G:A	chr12:21141577	A	ENSG00000134538	ENST00000256958	Transcript	start_lost	107	3	1	M/I	atG/atA	rs773947239	HIGH	-	1	-	SNV	SLCO1B1	HGNC	HGNC:10959	protein_coding	YES	NM_006446.5	-	1	P1	CCDS8685.1	ENSP00000256958	Q9Y6L6.181	A0A024RAU7.41	UPI0000043BED	-	-	1	deleterious(0)	benign(0.424)	2023-02-15	-	-	-	ENST00000256958.3:c.3G>A	ENSP00000256958.2:p.Met1?	-	-	-	-	-	-
	12:21141581:C:A	chr12:21141581	A	ENSG00000134538	ENST00000256958	Transcript	missense_variant	111	7	3	Q/K	Caa/Aaa	rs1174387858,COSV57009930	MODERATE	-	1	-	SNV	SLCO1B1	HGNC	HGNC:10959	protein_coding	YES	NM_006446.5	-	1	P1	CCDS8685.1	ENSP00000256958	Q9Y6L6.181	A0A024RAU7.41	UPI0000043BED	-	-	1	tolerated(0.47)	benign(0.05)	2023-02-15	-	TIGRFAM:TIGR00805	-	ENST00000256958.3:c.7C>A	ENSP00000256958.2:p.Gln3Lys	-	-	-	-	-	-
	12:21141584:A:G	chr12:21141584	G	ENSG00000134538	ENST00000256958	Transcript	missense_variant	114	10	4	N/D	Aat/Gat	-	MODERATE	-	1	-	SNV	SLCO1B1	HGNC	HGNC:10959	protein_coding	YES	NM_006446.5	-	1	P1	CCDS8685.1	ENSP00000256958	Q9Y6L6.181	A0A024RAU7.41	UPI0000043BED	-	-	1	tolerated(0.26)	benign(0.003)	2023-02-15	-	TIGRFAM:TIGR00805	-	ENST00000256958.3:c.10A>G	ENSP00000256958.2:p.Asn4Asp	-	-	-	-	-	-
	12:21141589:A:G	chr12:21141589	G	ENSG00000134538	ENST00000256958	Transcript	synonymous_variant	119	15	5	Q	caA/caG	-	LOW	-	1	-	SNV	SLCO1B1	HGNC	HGNC:10959	protein_coding	YES	NM_006446.5	-	1	P1	CCDS8685.1	ENSP00000256958	Q9Y6L6.181	A0A024RAU7.41	UPI0000043BED	-	-	1	-	-	2023-02-15	-	TIGRFAM:TIGR00805	-	ENST00000256958.3:c.15A>G	ENSP00000256958.2:p.Gln5%3D	-	-	-	-	-	-
	12:21141591:A:C	chr12:21141591	C	ENSG00000134538	ENST00000256958	Transcript	missense_variant	121	17	6	H/P	cAt/cCt	-	MODERATE	-	1	-	SNV	SLCO1B1	HGNC	HGNC:10959	protein_coding	YES	NM_006446.5	-	1	P1	CCDS8685.1	ENSP00000256958	Q9Y6L6.181	A0A024RAU7.41	UPI0000043BED	-	-	1	tolerated(0.25)	benign(0.001)	2023-02-15	-	TIGRFAM:TIGR00805,Superfamily:SSF103473	-	ENST00000256958.3:c.17A>C	ENSP00000256958.2:p.His6Pro	-	-	-	-	-	-
	12:21141595:G:C	chr12:21141595	C	ENSG00000134538	ENST00000256958	Transcript	missense_variant	125	21	7	L/F	ttG/ttC	COSV57008766	MODERATE	-	1	-	SNV	SLCO1B1	HGNC	HGNC:10959	protein_coding	YES	NM_006446.5	-	1	P1	CCDS8685.1	ENSP00000256958	Q9Y6L6.181	A0A024RAU7.41	UPI0000043BED	-	-	1	deleterious(0.05)	benign(0.01)	2023-02-15	-	PANTHER:PTHR11388,PANTHER:PTHR11388:SF82,TIGRFAM:TIGR00805,Superfamily:SSF103473	-	ENST00000256958.3:c.21G>C	ENSP00000256958.2:p.Leu7Phe	-	-	-	-	-	-
	12:21141603:C:T	chr12:21141603	T	ENSG00000134538	ENST00000256958	Transcript	missense_variant	133	29	10	T/I	aCa/aTa	rs766950888	MODERATE	-	1	-	SNV	SLCO1B1	HGNC	HGNC:10959	protein_coding	YES	NM_006446.5	-	1	P1	CCDS8685.1	ENSP00000256958	Q9Y6L6.181	A0A024RAU7.41	UPI0000043BED	-	-	1	tolerated(0.12)	benign(0.013)	2023-02-15	-	PANTHER:PTHR11388,PANTHER:PTHR11388:SF82,TIGRFAM:TIGR00805,Superfamily:SSF103473	-	ENST00000256958.3:c.29C>T	ENSP00000256958.2:p.Thr10Ile	-	-	-	-	-	-
	12:21141604:A:G	chr12:21141604	G	ENSG00000134538	ENST00000256958	Transcript	synonymous_variant	134	30	10	T	acA/acG	rs113635866,COSV57013569	LOW	-	1	-	SNV	SLCO1B1	HGNC	HGNC:10959	protein_coding	YES	NM_006446.5	-	1	P1	CCDS8685.1	ENSP00000256958	Q9Y6L6.181	A0A024RAU7.41	UPI0000043BED	-	-	1	-	-	2023-02-15	-	PANTHER:PTHR11388,PANTHER:PTHR11388:SF82,TIGRFAM:TIGR00805,Superfamily:SSF103473	-	ENST00000256958.3:c.30A>G	ENSP00000256958.2:p.Thr10%3D	-	0.0012	0.0045	0	0	0
	12:21141605:G:A	chr12:21141605	A	ENSG00000134538	ENST00000256958	Transcript	missense_variant	135	31	11	A/T	Gca/Aca	-	MODERATE	-	1	-	SNV	SLCO1B1	HGNC	HGNC:10959	protein_coding	YES	NM_006446.5	-	1	P1	CCDS8685.1	ENSP00000256958	Q9Y6L6.181	A0A024RAU7.41	UPI0000043BED	-	-	1	tolerated(0.34)	benign(0.001)	2023-02-15	-	PANTHER:PTHR11388,PANTHER:PTHR11388:SF82,TIGRFAM:TIGR00805,Superfamily:SSF103473	-	ENST00000256958.3:c.31G>A	ENSP00000256958.2:p.Ala11Thr	-	-	-	-	-	-
	12:21141606:C:T	chr12:21141606	T	ENSG00000134538	ENST00000256958	Transcript	missense_variant	136	32	11	A/V	gCa/gTa	-	MODERATE	-	1	-	SNV	SLCO1B1	HGNC	HGNC:10959	protein_coding	YES	NM_006446.5	-	1	P1	CCDS8685.1	ENSP00000256958	Q9Y6L6.181	A0A024RAU7.41	UPI0000043BED	-	-	1	tolerated(0.1)	benign(0.05)	2023-02-15	-	PANTHER:PTHR11388,PANTHER:PTHR11388:SF82,TIGRFAM:TIGR00805,Superfamily:SSF103473	-	ENST00000256958.3:c.32C>T	ENSP00000256958.2:p.Ala11Val	-	-	-	-	-	-
	12:21141607:A:G	chr12:21141607	G	ENSG00000134538	ENST00000256958	Transcript	synonymous_variant	137	33	11	A	gcA/gcG	-	LOW	-	1	-	SNV	SLCO1B1	HGNC	HGNC:10959	protein_coding	YES	NM_006446.5	-	1	P1	CCDS8685.1	ENSP00000256958	Q9Y6L6.181	A0A024RAU7.41	UPI0000043BED	-	-	1	-	-	2023-02-15	-	PANTHER:PTHR11388,PANTHER:PTHR11388:SF82,TIGRFAM:TIGR00805,Superfamily:SSF103473	-	ENST00000256958.3:c.33A>G	ENSP00000256958.2:p.Ala11%3D	-	-	-	-	-	-
	12:21141612:C:A	chr12:21141612	A	ENSG00000134538	ENST00000256958	Transcript	missense_variant	142	38	13	A/E	gCa/gAa	rs778214174	MODERATE	-	1	-	SNV	SLCO1B1	HGNC	HGNC:10959	protein_coding	YES	NM_006446.5	-	1	P1	CCDS8685.1	ENSP00000256958	Q9Y6L6.181	A0A024RAU7.41	UPI0000043BED	-	-	1	tolerated(0.83)	benign(0.009)	2023-02-15	-	PANTHER:PTHR11388,PANTHER:PTHR11388:SF82,TIGRFAM:TIGR00805,Superfamily:SSF103473	-	ENST00000256958.3:c.38C>A	ENSP00000256958.2:p.Ala13Glu	-	-	-	-	-	-
	12:21141616:A:G	chr12:21141616	G	ENSG00000134538	ENST00000256958	Transcript	synonymous_variant	146	42	14	Q	caA/caG	-	LOW	-	1	-	SNV	SLCO1B1	HGNC	HGNC:10959	protein_coding	YES	NM_006446.5	-	1	P1	CCDS8685.1	ENSP00000256958	Q9Y6L6.181	A0A024RAU7.41	UPI0000043BED	-	-	1	-	-	2023-02-15	-	PANTHER:PTHR11388,PANTHER:PTHR11388:SF82,TIGRFAM:TIGR00805,Superfamily:SSF103473	-	ENST00000256958.3:c.42A>G	ENSP00000256958.2:p.Gln14%3D	-	-	-	-	-	-
	12:21141617:C:T	chr12:21141617	T	ENSG00000134538	ENST00000256958	Transcript	missense_variant	147	43	15	P/S	Cct/Tct	COSV57013658	MODERATE	-	1	-	SNV	SLCO1B1	HGNC	HGNC:10959	protein_coding	YES	NM_006446.5	-	1	P1	CCDS8685.1	ENSP00000256958	Q9Y6L6.181	A0A024RAU7.41	UPI0000043BED	-	-	1	tolerated(0.82)	benign(0)	2023-02-15	-	PANTHER:PTHR11388,PANTHER:PTHR11388:SF82,TIGRFAM:TIGR00805,Superfamily:SSF103473	-	ENST00000256958.3:c.43C>T	ENSP00000256958.2:p.Pro15Ser	-	-	-	-	-	-
	12:21141618:C:G	chr12:21141618	G	ENSG00000134538	ENST00000256958	Transcript	missense_variant	148	44	15	P/R	cCt/cGt	-	MODERATE	-	1	-	SNV	SLCO1B1	HGNC	HGNC:10959	protein_coding	YES	NM_006446.5	-	1	P1	CCDS8685.1	ENSP00000256958	Q9Y6L6.181	A0A024RAU7.41	UPI0000043BED	-	-	1	tolerated(0.15)	benign(0.005)	2023-02-15	-	PANTHER:PTHR11388,PANTHER:PTHR11388:SF82,TIGRFAM:TIGR00805,Superfamily:SSF103473	-	ENST00000256958.3:c.44C>G	ENSP00000256958.2:p.Pro15Arg	-	-	-	-	-	-
	12:21141621:C:G	chr12:21141621	G	ENSG00000134538	ENST00000256958	Transcript	stop_gained	151	47	16	S/*	tCa/tGa	COSV99919443	HIGH	-	1	-	SNV	SLCO1B1	HGNC	HGNC:10959	protein_coding	YES	NM_006446.5	-	1	P1	CCDS8685.1	ENSP00000256958	Q9Y6L6.181	A0A024RAU7.41	UPI0000043BED	-	-	1	-	-	2023-02-15	-	PANTHER:PTHR11388,PANTHER:PTHR11388:SF82,TIGRFAM:TIGR00805,Superfamily:SSF103473	-	ENST00000256958.3:c.47C>G	ENSP00000256958.2:p.Ser16Ter	-	-	-	-	-	-
	12:21141625:G:A	chr12:21141625	A	ENSG00000134538	ENST00000256958	Transcript	synonymous_variant	155	51	17	E	gaG/gaA	rs754752027,COSV57011281	LOW	-	1	-	SNV	SLCO1B1	HGNC	HGNC:10959	protein_coding	YES	NM_006446.5	-	1	P1	CCDS8685.1	ENSP00000256958	Q9Y6L6.181	A0A024RAU7.41	UPI0000043BED	-	-	1	-	-	2023-02-15	-	PANTHER:PTHR11388,PANTHER:PTHR11388:SF82,TIGRFAM:TIGR00805,Superfamily:SSF103473	-	ENST00000256958.3:c.51G>A	ENSP00000256958.2:p.Glu17%3D	-	-	-	-	-	-
	12:21141629:A:G	chr12:21141629	G	ENSG00000134538	ENST00000256958	Transcript	missense_variant	159	55	19	K/E	Aag/Gag	CM147512	MODERATE	-	1	-	SNV	SLCO1B1	HGNC	HGNC:10959	protein_coding	YES	NM_006446.5	-	1	P1	CCDS8685.1	ENSP00000256958	Q9Y6L6.181	A0A024RAU7.41	UPI0000043BED	-	-	1	tolerated(0.13)	benign(0.013)	2023-02-15	-	PANTHER:PTHR11388,PANTHER:PTHR11388:SF82,TIGRFAM:TIGR00805,Superfamily:SSF103473	-	ENST00000256958.3:c.55A>G	ENSP00000256958.2:p.Lys19Glu	-	-	-	-	-	-
	12:21141629:A:T	chr12:21141629	T	ENSG00000134538	ENST00000256958	Transcript	stop_gained	159	55	19	K/*	Aag/Tag	rs376829525,CM147512	HIGH	-	1	-	SNV	SLCO1B1	HGNC	HGNC:10959	protein_coding	YES	NM_006446.5	-	1	P1	CCDS8685.1	ENSP00000256958	Q9Y6L6.181	A0A024RAU7.41	UPI0000043BED	-	-	1	-	-	2023-02-15	-	PANTHER:PTHR11388,PANTHER:PTHR11388:SF82,TIGRFAM:TIGR00805,Superfamily:SSF103473	-	ENST00000256958.3:c.55A>T	ENSP00000256958.2:p.Lys19Ter	-	-	-	-	-	-
	12:21141639:G:C	chr12:21141639	C	ENSG00000134538	ENST00000256958	Transcript	missense_variant	169	65	22	R/T	aGa/aCa	rs758561937,COSV57007432	MODERATE	-	1	-	SNV	SLCO1B1	HGNC	HGNC:10959	protein_coding	YES	NM_006446.5	-	1	P1	CCDS8685.1	ENSP00000256958	Q9Y6L6.181	A0A024RAU7.41	UPI0000043BED	-	-	1	tolerated(0.14)	benign(0.017)	2023-02-15	-	PANTHER:PTHR11388,PANTHER:PTHR11388:SF82,TIGRFAM:TIGR00805,Superfamily:SSF103473	-	ENST00000256958.3:c.65G>C	ENSP00000256958.2:p.Arg22Thr	-	-	-	-	-	-
	12:21141640:A:T	chr12:21141640	T	ENSG00000134538	ENST00000256958	Transcript	missense_variant	170	66	22	R/S	agA/agT	rs142087529	MODERATE	-	1	-	SNV	SLCO1B1	HGNC	HGNC:10959	protein_coding	YES	NM_006446.5	-	1	P1	CCDS8685.1	ENSP00000256958	Q9Y6L6.181	A0A024RAU7.41	UPI0000043BED	-	-	1	tolerated(0.47)	benign(0.01)	2023-02-15	-	PANTHER:PTHR11388,PANTHER:PTHR11388:SF82,TIGRFAM:TIGR00805,Superfamily:SSF103473	-	ENST00000256958.3:c.66A>T	ENSP00000256958.2:p.Arg22Ser	-	-	-	-	-	-
	12:21141642:ACT:A	chr12:21141643-21141644	-	ENSG00000134538	ENST00000256958	Transcript	stop_gained,frameshift_variant	173-174	69-70	23-24	YC/*	taCTgc/tagc	-	HIGH	-	1	-	deletion	SLCO1B1	HGNC	HGNC:10959	protein_coding	YES	NM_006446.5	-	1	P1	CCDS8685.1	ENSP00000256958	Q9Y6L6.181	A0A024RAU7.41	UPI0000043BED	-	-	1	-	-	2023-02-15	-	PANTHER:PTHR11388,PANTHER:PTHR11388:SF82,TIGRFAM:TIGR00805,Superfamily:SSF103473	-	ENST00000256958.3:c.69_70del	ENSP00000256958.2:p.Tyr23Ter	-	-	-	-	-	-
	12:21141643:C:A	chr12:21141643	A	ENSG00000134538	ENST00000256958	Transcript	stop_gained	173	69	23	Y/*	taC/taA	-	HIGH	-	1	-	SNV	SLCO1B1	HGNC	HGNC:10959	protein_coding	YES	NM_006446.5	-	1	P1	CCDS8685.1	ENSP00000256958	Q9Y6L6.181	A0A024RAU7.41	UPI0000043BED	-	-	1	-	-	2023-02-15	-	PANTHER:PTHR11388,PANTHER:PTHR11388:SF82,TIGRFAM:TIGR00805,Superfamily:SSF103473	-	ENST00000256958.3:c.69C>A	ENSP00000256958.2:p.Tyr23Ter	-	-	-	-	-	-
	12:21141643:C:T	chr12:21141643	T	ENSG00000134538	ENST00000256958	Transcript	synonymous_variant	173	69	23	Y	taC/taT	rs747107414	LOW	-	1	-	SNV	SLCO1B1	HGNC	HGNC:10959	protein_coding	YES	NM_006446.5	-	1	P1	CCDS8685.1	ENSP00000256958	Q9Y6L6.181	A0A024RAU7.41	UPI0000043BED	-	-	1	-	-	2023-02-15	-	PANTHER:PTHR11388,PANTHER:PTHR11388:SF82,TIGRFAM:TIGR00805,Superfamily:SSF103473	-	ENST00000256958.3:c.69C>T	ENSP00000256958.2:p.Tyr23%3D	-	-	-	-	-	-
	12:21141648:A:G	chr12:21141648	G	ENSG00000134538	ENST00000256958	Transcript	missense_variant	178	74	25	N/S	aAt/aGt	rs1236489495	MODERATE	-	1	-	SNV	SLCO1B1	HGNC	HGNC:10959	protein_coding	YES	NM_006446.5	-	1	P1	CCDS8685.1	ENSP00000256958	Q9Y6L6.181	A0A024RAU7.41	UPI0000043BED	-	-	1	tolerated(0.25)	benign(0.003)	2023-02-15	-	PANTHER:PTHR11388,PANTHER:PTHR11388:SF82,TIGRFAM:TIGR00805,Superfamily:SSF103473	-	ENST00000256958.3:c.74A>G	ENSP00000256958.2:p.Asn25Ser	-	-	-	-	-	-
	12:21141653:T:C	chr12:21141653	C	ENSG00000134538	ENST00000256958	Transcript	synonymous_variant	183	79	27	L	Ttg/Ctg	rs190581845	LOW	-	1	-	SNV	SLCO1B1	HGNC	HGNC:10959	protein_coding	YES	NM_006446.5	-	1	P1	CCDS8685.1	ENSP00000256958	Q9Y6L6.181	A0A024RAU7.41	UPI0000043BED	-	-	1	-	-	2023-02-15	-	PANTHER:PTHR11388,PANTHER:PTHR11388:SF82,TIGRFAM:TIGR00805,Superfamily:SSF103473	-	ENST00000256958.3:c.79T>C	ENSP00000256958.2:p.Leu27%3D	-	0.0002	0	0.0014	0	0
	12:21141659:G:A	chr12:21141659	A	ENSG00000134538	ENST00000256958	Transcript	splice_donor_variant	-	-	-	-	-	rs571639279	HIGH	-	1	-	SNV	SLCO1B1	HGNC	HGNC:10959	protein_coding	YES	NM_006446.5	-	1	P1	CCDS8685.1	ENSP00000256958	Q9Y6L6.181	A0A024RAU7.41	UPI0000043BED	-	-	1	-	-	-	2023-02-14	-	-	ENST00000256958.3:c.84+1G>A	-	-	0.0004	0	0	0	0
	12:21141660:T:C	chr12:21141660	C	ENSG00000134538	ENST00000256958	Transcript	splice_donor_variant	-	-	-	-	-	-	HIGH	-	1	-	SNV	SLCO1B1	HGNC	HGNC:10959	protein_coding	YES	NM_006446.5	-	1	P1	CCDS8685.1	ENSP00000256958	Q9Y6L6.181	A0A024RAU7.41	UPI0000043BED	-	-	1	-	-	-	2023-02-14	-	-	ENST00000256958.3:c.84+2T>C	-	-	-	-	-	-	-
	12:21141660:T:G	chr12:21141660	G	ENSG00000134538	ENST00000256958	Transcript	splice_donor_variant	-	-	-	-	-	rs1017205455	HIGH	-	1	-	SNV	SLCO1B1	HGNC	HGNC:10959	protein_coding	YES	NM_006446.5	-	1	P1	CCDS8685.1	ENSP00000256958	Q9Y6L6.181	A0A024RAU7.41	UPI0000043BED	-	-	1	-	-	-	2023-02-14	-	-	ENST00000256958.3:c.84+2T>G	-	-	-	-	-	-	-
	12:21141664:AT:A	chr12:21141665	-	ENSG00000134538	ENST00000256958	Transcript	splice_region_variant,intron_variant	-	-	-	-	-	rs777741629,COSV57008358	LOW	-	1	-	deletion	SLCO1B1	HGNC	HGNC:10959	protein_coding	YES	NM_006446.5	-	1	P1	CCDS8685.1	ENSP00000256958	Q9Y6L6.181	A0A024RAU7.41	UPI0000043BED	-	-	1	-	-	-	2023-02-14	-	-	ENST00000256958.3:c.84+7del	-	-	-	-	-	-	-
	12:21141668:G:A	chr12:21141668	A	ENSG00000134538	ENST00000256958	Transcript	intron_variant	-	-	-	-	-	-	MODIFIER	-	1	-	SNV	SLCO1B1	HGNC	HGNC:10959	protein_coding	YES	NM_006446.5	-	1	P1	CCDS8685.1	ENSP00000256958	Q9Y6L6.181	A0A024RAU7.41	UPI0000043BED	-	-	1	-	-	-	2023-02-14	-	-	ENST00000256958.3:c.84+10G>A	-	-	-	-	-	-	-
	12:21141674:T:C	chr12:21141674	C	ENSG00000134538	ENST00000256958	Transcript	intron_variant	-	-	-	-	-	rs1361718207	MODIFIER	-	1	-	SNV	SLCO1B1	HGNC	HGNC:10959	protein_coding	YES	NM_006446.5	-	1	P1	CCDS8685.1	ENSP00000256958	Q9Y6L6.181	A0A024RAU7.41	UPI0000043BED	-	-	1	-	-	-	2023-02-14	-	-	ENST00000256958.3:c.84+16T>C	-	-	-	-	-	-	-
	12:21141676:T:C	chr12:21141676	C	ENSG00000134538	ENST00000256958	Transcript	intron_variant	-	-	-	-	-	-	MODIFIER	-	1	-	SNV	SLCO1B1	HGNC	HGNC:10959	protein_coding	YES	NM_006446.5	-	1	P1	CCDS8685.1	ENSP00000256958	Q9Y6L6.181	A0A024RAU7.41	UPI0000043BED	-	-	1	-	-	-	2023-02-14	-	-	ENST00000256958.3:c.84+18T>C	-	-	-	-	-	-	-
	12:21141683:G:A	chr12:21141683	A	ENSG00000134538	ENST00000256958	Transcript	intron_variant	-	-	-	-	-	rs761397156	MODIFIER	-	1	-	SNV	SLCO1B1	HGNC	HGNC:10959	protein_coding	YES	NM_006446.5	-	1	P1	CCDS8685.1	ENSP00000256958	Q9Y6L6.181	A0A024RAU7.41	UPI0000043BED	-	-	1	-	-	-	2023-02-14	-	-	ENST00000256958.3:c.84+25G>A	-	-	-	-	-	-	-
	12:21141692:A:G	chr12:21141692	G	ENSG00000134538	ENST00000256958	Transcript	intron_variant	-	-	-	-	-	-	MODIFIER	-	1	-	SNV	SLCO1B1	HGNC	HGNC:10959	protein_coding	YES	NM_006446.5	-	1	P1	CCDS8685.1	ENSP00000256958	Q9Y6L6.181	A0A024RAU7.41	UPI0000043BED	-	-	1	-	-	-	2023-02-14	-	-	ENST00000256958.3:c.84+34A>G	-	-	-	-	-	-	-
	12:21141702:G:A	chr12:21141702	A	ENSG00000134538	ENST00000256958	Transcript	intron_variant	-	-	-	-	-	-	MODIFIER	-	1	-	SNV	SLCO1B1	HGNC	HGNC:10959	protein_coding	YES	NM_006446.5	-	1	P1	CCDS8685.1	ENSP00000256958	Q9Y6L6.181	A0A024RAU7.41	UPI0000043BED	-	-	1	-	-	-	2023-02-14	-	-	ENST00000256958.3:c.84+44G>A	-	-	-	-	-	-	-
	12:21141706:T:C	chr12:21141706	C	ENSG00000134538	ENST00000256958	Transcript	intron_variant	-	-	-	-	-	rs1468859981	MODIFIER	-	1	-	SNV	SLCO1B1	HGNC	HGNC:10959	protein_coding	YES	NM_006446.5	-	1	P1	CCDS8685.1	ENSP00000256958	Q9Y6L6.181	A0A024RAU7.41	UPI0000043BED	-	-	1	-	-	-	2023-02-14	-	-	ENST00000256958.3:c.84+48T>C	-	-	-	-	-	-	-
	12:21141707:TTAATG:T	chr12:21141708-21141712	-	ENSG00000134538	ENST00000256958	Transcript	intron_variant	-	-	-	-	-	-	MODIFIER	-	1	-	deletion	SLCO1B1	HGNC	HGNC:10959	protein_coding	YES	NM_006446.5	-	1	P1	CCDS8685.1	ENSP00000256958	Q9Y6L6.181	A0A024RAU7.41	UPI0000043BED	-	-	1	-	-	-	2023-02-14	-	-	ENST00000256958.3:c.84+52_84+56del	-	-	-	-	-	-	-
	12:21141708:T:C	chr12:21141708	C	ENSG00000134538	ENST00000256958	Transcript	intron_variant	-	-	-	-	-	-	MODIFIER	-	1	-	SNV	SLCO1B1	HGNC	HGNC:10959	protein_coding	YES	NM_006446.5	-	1	P1	CCDS8685.1	ENSP00000256958	Q9Y6L6.181	A0A024RAU7.41	UPI0000043BED	-	-	1	-	-	-	2023-02-14	-	-	ENST00000256958.3:c.84+50T>C	-	-	-	-	-	-	-
	12:21141708:T:G	chr12:21141708	G	ENSG00000134538	ENST00000256958	Transcript	intron_variant	-	-	-	-	-	rs1318131980	MODIFIER	-	1	-	SNV	SLCO1B1	HGNC	HGNC:10959	protein_coding	YES	NM_006446.5	-	1	P1	CCDS8685.1	ENSP00000256958	Q9Y6L6.181	A0A024RAU7.41	UPI0000043BED	-	-	1	-	-	-	2023-02-14	-	-	ENST00000256958.3:c.84+50T>G	-	-	-	-	-	-	-
	12:21141712:G:A	chr12:21141712	A	ENSG00000134538	ENST00000256958	Transcript	intron_variant	-	-	-	-	-	-	MODIFIER	-	1	-	SNV	SLCO1B1	HGNC	HGNC:10959	protein_coding	YES	NM_006446.5	-	1	P1	CCDS8685.1	ENSP00000256958	Q9Y6L6.181	A0A024RAU7.41	UPI0000043BED	-	-	1	-	-	-	2023-02-14	-	-	ENST00000256958.3:c.84+54G>A	-	-	-	-	-	-	-
	12:21141715:T:C	chr12:21141715	C	ENSG00000134538	ENST00000256958	Transcript	intron_variant	-	-	-	-	-	-	MODIFIER	-	1	-	SNV	SLCO1B1	HGNC	HGNC:10959	protein_coding	YES	NM_006446.5	-	1	P1	CCDS8685.1	ENSP00000256958	Q9Y6L6.181	A0A024RAU7.41	UPI0000043BED	-	-	1	-	-	-	2023-02-14	-	-	ENST00000256958.3:c.84+57T>C	-	-	-	-	-	-	-
	12:21141721:A:G	chr12:21141721	G	ENSG00000134538	ENST00000256958	Transcript	intron_variant	-	-	-	-	-	rs112297015	MODIFIER	-	1	-	SNV	SLCO1B1	HGNC	HGNC:10959	protein_coding	YES	NM_006446.5	-	1	P1	CCDS8685.1	ENSP00000256958	Q9Y6L6.181	A0A024RAU7.41	UPI0000043BED	-	-	1	-	-	-	2023-02-14	-	-	ENST00000256958.3:c.84+63A>G	-	-	-	-	-	-	-
	12:21141726:G:A	chr12:21141726	A	ENSG00000134538	ENST00000256958	Transcript	intron_variant	-	-	-	-	-	rs747325797	MODIFIER	-	1	-	SNV	SLCO1B1	HGNC	HGNC:10959	protein_coding	YES	NM_006446.5	-	1	P1	CCDS8685.1	ENSP00000256958	Q9Y6L6.181	A0A024RAU7.41	UPI0000043BED	-	-	1	-	-	-	2023-02-14	-	-	ENST00000256958.3:c.84+68G>A	-	-	-	-	-	-	-
	12:21141740:C:T	chr12:21141740	T	ENSG00000134538	ENST00000256958	Transcript	intron_variant	-	-	-	-	-	rs74403531	MODIFIER	-	1	-	SNV	SLCO1B1	HGNC	HGNC:10959	protein_coding	YES	NM_006446.5	-	1	P1	CCDS8685.1	ENSP00000256958	Q9Y6L6.181	A0A024RAU7.41	UPI0000043BED	-	-	1	-	-	-	2023-02-14	-	-	ENST00000256958.3:c.84+82C>T	-	-	0.0014	0	0	0.0069	0
	12:21141741:A:T	chr12:21141741	T	ENSG00000134538	ENST00000256958	Transcript	intron_variant	-	-	-	-	-	-	MODIFIER	-	1	-	SNV	SLCO1B1	HGNC	HGNC:10959	protein_coding	YES	NM_006446.5	-	1	P1	CCDS8685.1	ENSP00000256958	Q9Y6L6.181	A0A024RAU7.41	UPI0000043BED	-	-	1	-	-	-	2023-02-14	-	-	ENST00000256958.3:c.84+83A>T	-	-	-	-	-	-	-
	12:21141744:A:C	chr12:21141744	C	ENSG00000134538	ENST00000256958	Transcript	intron_variant	-	-	-	-	-	-	MODIFIER	-	1	-	SNV	SLCO1B1	HGNC	HGNC:10959	protein_coding	YES	NM_006446.5	-	1	P1	CCDS8685.1	ENSP00000256958	Q9Y6L6.181	A0A024RAU7.41	UPI0000043BED	-	-	1	-	-	-	2023-02-14	-	-	ENST00000256958.3:c.84+86A>C	-	-	-	-	-	-	-
	12:21141752:A:G	chr12:21141752	G	ENSG00000134538	ENST00000256958	Transcript	intron_variant	-	-	-	-	-	-	MODIFIER	-	1	-	SNV	SLCO1B1	HGNC	HGNC:10959	protein_coding	YES	NM_006446.5	-	1	P1	CCDS8685.1	ENSP00000256958	Q9Y6L6.181	A0A024RAU7.41	UPI0000043BED	-	-	1	-	-	-	2023-02-14	-	-	ENST00000256958.3:c.84+94A>G	-	-	-	-	-	-	-
	12:21141752:A:T	chr12:21141752	T	ENSG00000134538	ENST00000256958	Transcript	intron_variant	-	-	-	-	-	rs1283012469	MODIFIER	-	1	-	SNV	SLCO1B1	HGNC	HGNC:10959	protein_coding	YES	NM_006446.5	-	1	P1	CCDS8685.1	ENSP00000256958	Q9Y6L6.181	A0A024RAU7.41	UPI0000043BED	-	-	1	-	-	-	2023-02-14	-	-	ENST00000256958.3:c.84+94A>T	-	-	-	-	-	-	-
	12:21141755:T:C	chr12:21141755	C	ENSG00000134538	ENST00000256958	Transcript	intron_variant	-	-	-	-	-	-	MODIFIER	-	1	-	SNV	SLCO1B1	HGNC	HGNC:10959	protein_coding	YES	NM_006446.5	-	1	P1	CCDS8685.1	ENSP00000256958	Q9Y6L6.181	A0A024RAU7.41	UPI0000043BED	-	-	1	-	-	-	2023-02-14	-	-	ENST00000256958.3:c.84+97T>C	-	-	-	-	-	-	-
	12:21172550:T:A	chr12:21172550	A	ENSG00000134538	ENST00000256958	Transcript	intron_variant	-	-	-	-	-	-	MODIFIER	-	1	-	SNV	SLCO1B1	HGNC	HGNC:10959	protein_coding	YES	NM_006446.5	-	1	P1	CCDS8685.1	ENSP00000256958	Q9Y6L6.181	A0A024RAU7.41	UPI0000043BED	-	-	1	-	-	-	2023-02-14	-	-	ENST00000256958.3:c.85-100T>A	-	-	-	-	-	-	-
	12:21172556:G:T	chr12:21172556	T	ENSG00000134538	ENST00000256958	Transcript	intron_variant	-	-	-	-	-	-	MODIFIER	-	1	-	SNV	SLCO1B1	HGNC	HGNC:10959	protein_coding	YES	NM_006446.5	-	1	P1	CCDS8685.1	ENSP00000256958	Q9Y6L6.181	A0A024RAU7.41	UPI0000043BED	-	-	1	-	-	-	2023-02-14	-	-	ENST00000256958.3:c.85-94G>T	-	-	-	-	-	-	-
	12:21172561:G:A	chr12:21172561	A	ENSG00000134538	ENST00000256958	Transcript	intron_variant	-	-	-	-	-	rs398088124	MODIFIER	-	1	-	SNV	SLCO1B1	HGNC	HGNC:10959	protein_coding	YES	NM_006446.5	-	1	P1	CCDS8685.1	ENSP00000256958	Q9Y6L6.181	A0A024RAU7.41	UPI0000043BED	-	-	1	-	-	-	2023-02-14	-	-	ENST00000256958.3:c.85-89G>A	-	-	-	-	-	-	-
	12:21172563:AG:A	chr12:21172564	-	ENSG00000134538	ENST00000256958	Transcript	intron_variant	-	-	-	-	-	-	MODIFIER	-	1	-	deletion	SLCO1B1	HGNC	HGNC:10959	protein_coding	YES	NM_006446.5	-	1	P1	CCDS8685.1	ENSP00000256958	Q9Y6L6.181	A0A024RAU7.41	UPI0000043BED	-	-	1	-	-	-	2023-02-14	-	-	ENST00000256958.3:c.85-86del	-	-	-	-	-	-	-
	12:21172567:AG:A	chr12:21172568	-	ENSG00000134538	ENST00000256958	Transcript	intron_variant	-	-	-	-	-	rs1197478697,COSV57012932	MODIFIER	-	1	-	deletion	SLCO1B1	HGNC	HGNC:10959	protein_coding	YES	NM_006446.5	-	1	P1	CCDS8685.1	ENSP00000256958	Q9Y6L6.181	A0A024RAU7.41	UPI0000043BED	-	-	1	-	-	-	2023-02-14	-	-	ENST00000256958.3:c.85-82del	-	-	-	-	-	-	-
	12:21172569:C:G	chr12:21172569	G	ENSG00000134538	ENST00000256958	Transcript	intron_variant	-	-	-	-	-	-	MODIFIER	-	1	-	SNV	SLCO1B1	HGNC	HGNC:10959	protein_coding	YES	NM_006446.5	-	1	P1	CCDS8685.1	ENSP00000256958	Q9Y6L6.181	A0A024RAU7.41	UPI0000043BED	-	-	1	-	-	-	2023-02-14	-	-	ENST00000256958.3:c.85-81C>G	-	-	-	-	-	-	-
	12:21172570:T:C	chr12:21172570	C	ENSG00000134538	ENST00000256958	Transcript	intron_variant	-	-	-	-	-	rs1266005763	MODIFIER	-	1	-	SNV	SLCO1B1	HGNC	HGNC:10959	protein_coding	YES	NM_006446.5	-	1	P1	CCDS8685.1	ENSP00000256958	Q9Y6L6.181	A0A024RAU7.41	UPI0000043BED	-	-	1	-	-	-	2023-02-14	-	-	ENST00000256958.3:c.85-80T>C	-	-	-	-	-	-	-
	12:21172573:T:C	chr12:21172573	C	ENSG00000134538	ENST00000256958	Transcript	intron_variant	-	-	-	-	-	-	MODIFIER	-	1	-	SNV	SLCO1B1	HGNC	HGNC:10959	protein_coding	YES	NM_006446.5	-	1	P1	CCDS8685.1	ENSP00000256958	Q9Y6L6.181	A0A024RAU7.41	UPI0000043BED	-	-	1	-	-	-	2023-02-14	-	-	ENST00000256958.3:c.85-77T>C	-	-	-	-	-	-	-
	12:21172577:A:C	chr12:21172577	C	ENSG00000134538	ENST00000256958	Transcript	intron_variant	-	-	-	-	-	rs755134496	MODIFIER	-	1	-	SNV	SLCO1B1	HGNC	HGNC:10959	protein_coding	YES	NM_006446.5	-	1	P1	CCDS8685.1	ENSP00000256958	Q9Y6L6.181	A0A024RAU7.41	UPI0000043BED	-	-	1	-	-	-	2023-02-14	-	-	ENST00000256958.3:c.85-73A>C	-	-	-	-	-	-	-
	12:21172581:C:T	chr12:21172581	T	ENSG00000134538	ENST00000256958	Transcript	intron_variant	-	-	-	-	-	-	MODIFIER	-	1	-	SNV	SLCO1B1	HGNC	HGNC:10959	protein_coding	YES	NM_006446.5	-	1	P1	CCDS8685.1	ENSP00000256958	Q9Y6L6.181	A0A024RAU7.41	UPI0000043BED	-	-	1	-	-	-	2023-02-14	-	-	ENST00000256958.3:c.85-69C>T	-	-	-	-	-	-	-
	12:21172582:A:G	chr12:21172582	G	ENSG00000134538	ENST00000256958	Transcript	intron_variant	-	-	-	-	-	rs1265332810	MODIFIER	-	1	-	SNV	SLCO1B1	HGNC	HGNC:10959	protein_coding	YES	NM_006446.5	-	1	P1	CCDS8685.1	ENSP00000256958	Q9Y6L6.181	A0A024RAU7.41	UPI0000043BED	-	-	1	-	-	-	2023-02-14	-	-	ENST00000256958.3:c.85-68A>G	-	-	-	-	-	-	-
	12:21172582:A:T	chr12:21172582	T	ENSG00000134538	ENST00000256958	Transcript	intron_variant	-	-	-	-	-	rs1265332810	MODIFIER	-	1	-	SNV	SLCO1B1	HGNC	HGNC:10959	protein_coding	YES	NM_006446.5	-	1	P1	CCDS8685.1	ENSP00000256958	Q9Y6L6.181	A0A024RAU7.41	UPI0000043BED	-	-	1	-	-	-	2023-02-14	-	-	ENST00000256958.3:c.85-68A>T	-	-	-	-	-	-	-
	12:21172583:TG:T	chr12:21172584	-	ENSG00000134538	ENST00000256958	Transcript	intron_variant	-	-	-	-	-	-	MODIFIER	-	1	-	deletion	SLCO1B1	HGNC	HGNC:10959	protein_coding	YES	NM_006446.5	-	1	P1	CCDS8685.1	ENSP00000256958	Q9Y6L6.181	A0A024RAU7.41	UPI0000043BED	-	-	1	-	-	-	2023-02-14	-	-	ENST00000256958.3:c.85-66del	-	-	-	-	-	-	-
	12:21172588:C:T	chr12:21172588	T	ENSG00000134538	ENST00000256958	Transcript	intron_variant	-	-	-	-	-	-	MODIFIER	-	1	-	SNV	SLCO1B1	HGNC	HGNC:10959	protein_coding	YES	NM_006446.5	-	1	P1	CCDS8685.1	ENSP00000256958	Q9Y6L6.181	A0A024RAU7.41	UPI0000043BED	-	-	1	-	-	-	2023-02-14	-	-	ENST00000256958.3:c.85-62C>T	-	-	-	-	-	-	-
	12:21172590:A:G	chr12:21172590	G	ENSG00000134538	ENST00000256958	Transcript	intron_variant	-	-	-	-	-	-	MODIFIER	-	1	-	SNV	SLCO1B1	HGNC	HGNC:10959	protein_coding	YES	NM_006446.5	-	1	P1	CCDS8685.1	ENSP00000256958	Q9Y6L6.181	A0A024RAU7.41	UPI0000043BED	-	-	1	-	-	-	2023-02-14	-	-	ENST00000256958.3:c.85-60A>G	-	-	-	-	-	-	-
	12:21172596:A:G	chr12:21172596	G	ENSG00000134538	ENST00000256958	Transcript	intron_variant	-	-	-	-	-	-	MODIFIER	-	1	-	SNV	SLCO1B1	HGNC	HGNC:10959	protein_coding	YES	NM_006446.5	-	1	P1	CCDS8685.1	ENSP00000256958	Q9Y6L6.181	A0A024RAU7.41	UPI0000043BED	-	-	1	-	-	-	2023-02-14	-	-	ENST00000256958.3:c.85-54A>G	-	-	-	-	-	-	-
	12:21172603:AG:A	chr12:21172604	-	ENSG00000134538	ENST00000256958	Transcript	intron_variant	-	-	-	-	-	-	MODIFIER	-	1	-	deletion	SLCO1B1	HGNC	HGNC:10959	protein_coding	YES	NM_006446.5	-	1	P1	CCDS8685.1	ENSP00000256958	Q9Y6L6.181	A0A024RAU7.41	UPI0000043BED	-	-	1	-	-	-	2023-02-14	-	-	ENST00000256958.3:c.85-46del	-	-	-	-	-	-	-
	12:21172610:C:T	chr12:21172610	T	ENSG00000134538	ENST00000256958	Transcript	intron_variant	-	-	-	-	-	rs570913041	MODIFIER	-	1	-	SNV	SLCO1B1	HGNC	HGNC:10959	protein_coding	YES	NM_006446.5	-	1	P1	CCDS8685.1	ENSP00000256958	Q9Y6L6.181	A0A024RAU7.41	UPI0000043BED	-	-	1	-	-	-	2023-02-14	-	-	ENST00000256958.3:c.85-40C>T	-	-	0.0004	0	0	0.002	0
	12:21172611:G:A	chr12:21172611	A	ENSG00000134538	ENST00000256958	Transcript	intron_variant	-	-	-	-	-	rs193253153	MODIFIER	-	1	-	SNV	SLCO1B1	HGNC	HGNC:10959	protein_coding	YES	NM_006446.5	-	1	P1	CCDS8685.1	ENSP00000256958	Q9Y6L6.181	A0A024RAU7.41	UPI0000043BED	-	-	1	-	-	-	2023-02-14	-	-	ENST00000256958.3:c.85-39G>A	-	-	0.0004	0	0	0.001	0.001
	12:21172611:G:T	chr12:21172611	T	ENSG00000134538	ENST00000256958	Transcript	intron_variant	-	-	-	-	-	-	MODIFIER	-	1	-	SNV	SLCO1B1	HGNC	HGNC:10959	protein_coding	YES	NM_006446.5	-	1	P1	CCDS8685.1	ENSP00000256958	Q9Y6L6.181	A0A024RAU7.41	UPI0000043BED	-	-	1	-	-	-	2023-02-14	-	-	ENST00000256958.3:c.85-39G>T	-	-	-	-	-	-	-
	12:21172612:AT:A	chr12:21172613	-	ENSG00000134538	ENST00000256958	Transcript	intron_variant	-	-	-	-	-	-	MODIFIER	-	1	-	deletion	SLCO1B1	HGNC	HGNC:10959	protein_coding	YES	NM_006446.5	-	1	P1	CCDS8685.1	ENSP00000256958	Q9Y6L6.181	A0A024RAU7.41	UPI0000043BED	-	-	1	-	-	-	2023-02-14	-	-	ENST00000256958.3:c.85-36del	-	-	-	-	-	-	-
	12:21172614:T:G	chr12:21172614	G	ENSG00000134538	ENST00000256958	Transcript	intron_variant	-	-	-	-	-	rs772900954	MODIFIER	-	1	-	SNV	SLCO1B1	HGNC	HGNC:10959	protein_coding	YES	NM_006446.5	-	1	P1	CCDS8685.1	ENSP00000256958	Q9Y6L6.181	A0A024RAU7.41	UPI0000043BED	-	-	1	-	-	-	2023-02-14	-	-	ENST00000256958.3:c.85-36T>G	-	-	-	-	-	-	-
	12:21172617:C:A	chr12:21172617	A	ENSG00000134538	ENST00000256958	Transcript	intron_variant	-	-	-	-	-	rs377564828	MODIFIER	-	1	-	SNV	SLCO1B1	HGNC	HGNC:10959	protein_coding	YES	NM_006446.5	-	1	P1	CCDS8685.1	ENSP00000256958	Q9Y6L6.181	A0A024RAU7.41	UPI0000043BED	-	-	1	-	-	-	2023-02-14	-	-	ENST00000256958.3:c.85-33C>A	-	-	-	-	-	-	-
	12:21172621:T:C	chr12:21172621	C	ENSG00000134538	ENST00000256958	Transcript	intron_variant	-	-	-	-	-	-	MODIFIER	-	1	-	SNV	SLCO1B1	HGNC	HGNC:10959	protein_coding	YES	NM_006446.5	-	1	P1	CCDS8685.1	ENSP00000256958	Q9Y6L6.181	A0A024RAU7.41	UPI0000043BED	-	-	1	-	-	-	2023-02-14	-	-	ENST00000256958.3:c.85-29T>C	-	-	-	-	-	-	-
	12:21172623:T:C	chr12:21172623	C	ENSG00000134538	ENST00000256958	Transcript	intron_variant	-	-	-	-	-	rs759362304	MODIFIER	-	1	-	SNV	SLCO1B1	HGNC	HGNC:10959	protein_coding	YES	NM_006446.5	-	1	P1	CCDS8685.1	ENSP00000256958	Q9Y6L6.181	A0A024RAU7.41	UPI0000043BED	-	-	1	-	-	-	2023-02-14	-	-	ENST00000256958.3:c.85-27T>C	-	-	-	-	-	-	-
	12:21172624:C:T	chr12:21172624	T	ENSG00000134538	ENST00000256958	Transcript	intron_variant	-	-	-	-	-	rs1374913341	MODIFIER	-	1	-	SNV	SLCO1B1	HGNC	HGNC:10959	protein_coding	YES	NM_006446.5	-	1	P1	CCDS8685.1	ENSP00000256958	Q9Y6L6.181	A0A024RAU7.41	UPI0000043BED	-	-	1	-	-	-	2023-02-14	-	-	ENST00000256958.3:c.85-26C>T	-	-	-	-	-	-	-
	12:21172625:C:T	chr12:21172625	T	ENSG00000134538	ENST00000256958	Transcript	intron_variant	-	-	-	-	-	rs759599735	MODIFIER	-	1	-	SNV	SLCO1B1	HGNC	HGNC:10959	protein_coding	YES	NM_006446.5	-	1	P1	CCDS8685.1	ENSP00000256958	Q9Y6L6.181	A0A024RAU7.41	UPI0000043BED	-	-	1	-	-	-	2023-02-14	-	-	ENST00000256958.3:c.85-25C>T	-	-	-	-	-	-	-
	12:21172631:T:C	chr12:21172631	C	ENSG00000134538	ENST00000256958	Transcript	intron_variant	-	-	-	-	-	rs765260100	MODIFIER	-	1	-	SNV	SLCO1B1	HGNC	HGNC:10959	protein_coding	YES	NM_006446.5	-	1	P1	CCDS8685.1	ENSP00000256958	Q9Y6L6.181	A0A024RAU7.41	UPI0000043BED	-	-	1	-	-	-	2023-02-14	-	-	ENST00000256958.3:c.85-19T>C	-	-	-	-	-	-	-
	12:21172633:C:G	chr12:21172633	G	ENSG00000134538	ENST00000256958	Transcript	intron_variant	-	-	-	-	-	-	MODIFIER	-	1	-	SNV	SLCO1B1	HGNC	HGNC:10959	protein_coding	YES	NM_006446.5	-	1	P1	CCDS8685.1	ENSP00000256958	Q9Y6L6.181	A0A024RAU7.41	UPI0000043BED	-	-	1	-	-	-	2023-02-14	-	-	ENST00000256958.3:c.85-17C>G	-	-	-	-	-	-	-
	12:21172633:C:T	chr12:21172633	T	ENSG00000134538	ENST00000256958	Transcript	intron_variant	-	-	-	-	-	-	MODIFIER	-	1	-	SNV	SLCO1B1	HGNC	HGNC:10959	protein_coding	YES	NM_006446.5	-	1	P1	CCDS8685.1	ENSP00000256958	Q9Y6L6.181	A0A024RAU7.41	UPI0000043BED	-	-	1	-	-	-	2023-02-14	-	-	ENST00000256958.3:c.85-17C>T	-	-	-	-	-	-	-
	12:21172639:A:G	chr12:21172639	G	ENSG00000134538	ENST00000256958	Transcript	intron_variant	-	-	-	-	-	rs1395345635	MODIFIER	-	1	-	SNV	SLCO1B1	HGNC	HGNC:10959	protein_coding	YES	NM_006446.5	-	1	P1	CCDS8685.1	ENSP00000256958	Q9Y6L6.181	A0A024RAU7.41	UPI0000043BED	-	-	1	-	-	-	2023-02-14	-	-	ENST00000256958.3:c.85-11A>G	-	-	-	-	-	-	-
	12:21172645:C:T	chr12:21172645	T	ENSG00000134538	ENST00000256958	Transcript	splice_region_variant,intron_variant	-	-	-	-	-	-	LOW	-	1	-	SNV	SLCO1B1	HGNC	HGNC:10959	protein_coding	YES	NM_006446.5	-	1	P1	CCDS8685.1	ENSP00000256958	Q9Y6L6.181	A0A024RAU7.41	UPI0000043BED	-	-	1	-	-	-	2023-02-14	-	-	ENST00000256958.3:c.85-5C>T	-	-	-	-	-	-	-
	12:21172649:G:T	chr12:21172649	T	ENSG00000134538	ENST00000256958	Transcript	splice_acceptor_variant	-	-	-	-	-	-	HIGH	-	1	-	SNV	SLCO1B1	HGNC	HGNC:10959	protein_coding	YES	NM_006446.5	-	1	P1	CCDS8685.1	ENSP00000256958	Q9Y6L6.181	A0A024RAU7.41	UPI0000043BED	-	-	1	-	-	-	2023-02-14	-	-	ENST00000256958.3:c.85-1G>T	-	-	-	-	-	-	-
	12:21172650:ATGTTCTTGGCAGCTC:A	chr12:21172651-21172665	-	ENSG00000134538	ENST00000256958	Transcript	inframe_deletion,splice_region_variant	190-204	86-100	29-34	MFLAAL/M	aTGTTCTTGGCAGCTCtg/atg	rs1464424028	MODERATE	-	1	-	deletion	SLCO1B1	HGNC	HGNC:10959	protein_coding	YES	NM_006446.5	-	1	P1	CCDS8685.1	ENSP00000256958	Q9Y6L6.181	A0A024RAU7.41	UPI0000043BED	-	-	1	-	-	2023-03-15	-	Transmembrane_helices:TMhelix,PROSITE_profiles:PS50850,PANTHER:PTHR11388,PANTHER:PTHR11388:SF82,Pfam:PF03137,TIGRFAM:TIGR00805,Superfamily:SSF103473	-	ENST00000256958.3:c.89_103del	ENSP00000256958.2:p.Phe30_Leu34del	3	-	-	-	-	-
	12:21172651:T:A	chr12:21172651	A	ENSG00000134538	ENST00000256958	Transcript	missense_variant,splice_region_variant	190	86	29	M/K	aTg/aAg	rs762818214	MODERATE	-	1	-	SNV	SLCO1B1	HGNC	HGNC:10959	protein_coding	YES	NM_006446.5	-	1	P1	CCDS8685.1	ENSP00000256958	Q9Y6L6.181	A0A024RAU7.41	UPI0000043BED	-	-	1	deleterious(0)	possibly_damaging(0.864)	2023-03-15	-	PANTHER:PTHR11388,PANTHER:PTHR11388:SF82,Pfam:PF03137,TIGRFAM:TIGR00805,Superfamily:SSF103473	-	ENST00000256958.3:c.86T>A	ENSP00000256958.2:p.Met29Lys	-	-	-	-	-	-
	12:21172656:T:C	chr12:21172656	C	ENSG00000134538	ENST00000256958	Transcript	synonymous_variant	195	91	31	L	Ttg/Ctg	-	LOW	-	1	-	SNV	SLCO1B1	HGNC	HGNC:10959	protein_coding	YES	NM_006446.5	-	1	P1	CCDS8685.1	ENSP00000256958	Q9Y6L6.181	A0A024RAU7.41	UPI0000043BED	-	-	1	-	-	2023-03-15	-	Transmembrane_helices:TMhelix,PROSITE_profiles:PS50850,PANTHER:PTHR11388,PANTHER:PTHR11388:SF82,Pfam:PF03137,TIGRFAM:TIGR00805,Superfamily:SSF103473	-	ENST00000256958.3:c.91T>C	ENSP00000256958.2:p.Leu31%3D	-	-	-	-	-	-
	12:21172658:G:T	chr12:21172658	T	ENSG00000134538	ENST00000256958	Transcript	missense_variant	197	93	31	L/F	ttG/ttT	-	MODERATE	-	1	-	SNV	SLCO1B1	HGNC	HGNC:10959	protein_coding	YES	NM_006446.5	-	1	P1	CCDS8685.1	ENSP00000256958	Q9Y6L6.181	A0A024RAU7.41	UPI0000043BED	-	-	1	tolerated(0.13)	possibly_damaging(0.624)	2023-03-15	-	Transmembrane_helices:TMhelix,PROSITE_profiles:PS50850,PANTHER:PTHR11388,PANTHER:PTHR11388:SF82,Pfam:PF03137,TIGRFAM:TIGR00805,Superfamily:SSF103473	-	ENST00000256958.3:c.93G>T	ENSP00000256958.2:p.Leu31Phe	-	-	-	-	-	-
	12:21172660:C:A	chr12:21172660	A	ENSG00000134538	ENST00000256958	Transcript	missense_variant	199	95	32	A/E	gCa/gAa	rs918985116	MODERATE	-	1	-	SNV	SLCO1B1	HGNC	HGNC:10959	protein_coding	YES	NM_006446.5	-	1	P1	CCDS8685.1	ENSP00000256958	Q9Y6L6.181	A0A024RAU7.41	UPI0000043BED	-	-	1	deleterious(0.01)	possibly_damaging(0.873)	2023-03-15	-	Transmembrane_helices:TMhelix,PROSITE_profiles:PS50850,PANTHER:PTHR11388,PANTHER:PTHR11388:SF82,Pfam:PF03137,TIGRFAM:TIGR00805,Superfamily:SSF103473	-	ENST00000256958.3:c.95C>A	ENSP00000256958.2:p.Ala32Glu	-	-	-	-	-	-
	12:21172660:C:T	chr12:21172660	T	ENSG00000134538	ENST00000256958	Transcript	missense_variant	199	95	32	A/V	gCa/gTa	rs918985116	MODERATE	-	1	-	SNV	SLCO1B1	HGNC	HGNC:10959	protein_coding	YES	NM_006446.5	-	1	P1	CCDS8685.1	ENSP00000256958	Q9Y6L6.181	A0A024RAU7.41	UPI0000043BED	-	-	1	tolerated(0.49)	benign(0.05)	2023-03-15	-	Transmembrane_helices:TMhelix,PROSITE_profiles:PS50850,PANTHER:PTHR11388,PANTHER:PTHR11388:SF82,Pfam:PF03137,TIGRFAM:TIGR00805,Superfamily:SSF103473	-	ENST00000256958.3:c.95C>T	ENSP00000256958.2:p.Ala32Val	-	-	-	-	-	-
	12:21172662:G:A	chr12:21172662	A	ENSG00000134538	ENST00000256958	Transcript	missense_variant	201	97	33	A/T	Gct/Act	-	MODERATE	-	1	-	SNV	SLCO1B1	HGNC	HGNC:10959	protein_coding	YES	NM_006446.5	-	1	P1	CCDS8685.1	ENSP00000256958	Q9Y6L6.181	A0A024RAU7.41	UPI0000043BED	-	-	1	deleterious(0)	probably_damaging(0.987)	2023-03-15	-	Transmembrane_helices:TMhelix,PROSITE_profiles:PS50850,PANTHER:PTHR11388,PANTHER:PTHR11388:SF82,Pfam:PF03137,TIGRFAM:TIGR00805,Superfamily:SSF103473	-	ENST00000256958.3:c.97G>A	ENSP00000256958.2:p.Ala33Thr	-	-	-	-	-	-
	12:21172669:C:A	chr12:21172669	A	ENSG00000134538	ENST00000256958	Transcript	stop_gained	208	104	35	S/*	tCa/tAa	-	HIGH	-	1	-	SNV	SLCO1B1	HGNC	HGNC:10959	protein_coding	YES	NM_006446.5	-	1	P1	CCDS8685.1	ENSP00000256958	Q9Y6L6.181	A0A024RAU7.41	UPI0000043BED	-	-	1	-	-	2023-03-15	-	Transmembrane_helices:TMhelix,PROSITE_profiles:PS50850,PANTHER:PTHR11388,PANTHER:PTHR11388:SF82,Pfam:PF03137,TIGRFAM:TIGR00805,Superfamily:SSF103473	-	ENST00000256958.3:c.104C>A	ENSP00000256958.2:p.Ser35Ter	-	-	-	-	-	-
	12:21172681:T:A	chr12:21172681	A	ENSG00000134538	ENST00000256958	Transcript	missense_variant	220	116	39	I/N	aTt/aAt	rs370556411,COSV99919091	MODERATE	-	1	-	SNV	SLCO1B1	HGNC	HGNC:10959	protein_coding	YES	NM_006446.5	-	1	P1	CCDS8685.1	ENSP00000256958	Q9Y6L6.181	A0A024RAU7.41	UPI0000043BED	-	-	1	deleterious(0)	probably_damaging(0.934)	2023-03-15	-	Transmembrane_helices:TMhelix,PROSITE_profiles:PS50850,PANTHER:PTHR11388,PANTHER:PTHR11388:SF82,Pfam:PF03137,TIGRFAM:TIGR00805,Superfamily:SSF103473	-	ENST00000256958.3:c.116T>A	ENSP00000256958.2:p.Ile39Asn	-	-	-	-	-	-
	12:21172682:T:C	chr12:21172682	C	ENSG00000134538	ENST00000256958	Transcript	synonymous_variant	221	117	39	I	atT/atC	-	LOW	-	1	-	SNV	SLCO1B1	HGNC	HGNC:10959	protein_coding	YES	NM_006446.5	-	1	P1	CCDS8685.1	ENSP00000256958	Q9Y6L6.181	A0A024RAU7.41	UPI0000043BED	-	-	1	-	-	2023-03-15	-	Transmembrane_helices:TMhelix,PROSITE_profiles:PS50850,PANTHER:PTHR11388,PANTHER:PTHR11388:SF82,Pfam:PF03137,TIGRFAM:TIGR00805,Superfamily:SSF103473	-	ENST00000256958.3:c.117T>C	ENSP00000256958.2:p.Ile39%3D	-	-	-	-	-	-
	12:21172683:G:A	chr12:21172683	A	ENSG00000134538	ENST00000256958	Transcript	missense_variant	222	118	40	A/T	Gct/Act	rs750457469	MODERATE	-	1	-	SNV	SLCO1B1	HGNC	HGNC:10959	protein_coding	YES	NM_006446.5	-	1	P1	CCDS8685.1	ENSP00000256958	Q9Y6L6.181	A0A024RAU7.41	UPI0000043BED	-	-	1	tolerated(0.12)	possibly_damaging(0.457)	2023-03-15	-	Transmembrane_helices:TMhelix,PROSITE_profiles:PS50850,PANTHER:PTHR11388,PANTHER:PTHR11388:SF82,Pfam:PF03137,TIGRFAM:TIGR00805,Superfamily:SSF103473	-	ENST00000256958.3:c.118G>A	ENSP00000256958.2:p.Ala40Thr	-	-	-	-	-	-
	12:21172686:A:G	chr12:21172686	G	ENSG00000134538	ENST00000256958	Transcript	missense_variant	225	121	41	K/E	Aag/Gag	-	MODERATE	-	1	-	SNV	SLCO1B1	HGNC	HGNC:10959	protein_coding	YES	NM_006446.5	-	1	P1	CCDS8685.1	ENSP00000256958	Q9Y6L6.181	A0A024RAU7.41	UPI0000043BED	-	-	1	deleterious(0)	probably_damaging(0.912)	2023-03-15	-	Transmembrane_helices:TMhelix,PROSITE_profiles:PS50850,PANTHER:PTHR11388,PANTHER:PTHR11388:SF82,Pfam:PF03137,TIGRFAM:TIGR00805,Superfamily:SSF103473	-	ENST00000256958.3:c.121A>G	ENSP00000256958.2:p.Lys41Glu	-	-	-	-	-	-
	12:21172689:A:C	chr12:21172689	C	ENSG00000134538	ENST00000256958	Transcript	missense_variant	228	124	42	T/P	Aca/Cca	rs780511571	MODERATE	-	1	-	SNV	SLCO1B1	HGNC	HGNC:10959	protein_coding	YES	NM_006446.5	-	1	P1	CCDS8685.1	ENSP00000256958	Q9Y6L6.181	A0A024RAU7.41	UPI0000043BED	-	-	1	deleterious(0.01)	benign(0.427)	2023-03-15	-	Transmembrane_helices:TMhelix,PROSITE_profiles:PS50850,PANTHER:PTHR11388,PANTHER:PTHR11388:SF82,Pfam:PF03137,TIGRFAM:TIGR00805,Superfamily:SSF103473	-	ENST00000256958.3:c.124A>C	ENSP00000256958.2:p.Thr42Pro	-	-	-	-	-	-
	12:21172690:C:A	chr12:21172690	A	ENSG00000134538	ENST00000256958	Transcript	missense_variant	229	125	42	T/K	aCa/aAa	-	MODERATE	-	1	-	SNV	SLCO1B1	HGNC	HGNC:10959	protein_coding	YES	NM_006446.5	-	1	P1	CCDS8685.1	ENSP00000256958	Q9Y6L6.181	A0A024RAU7.41	UPI0000043BED	-	-	1	deleterious(0.01)	benign(0.189)	2023-03-15	-	Transmembrane_helices:TMhelix,PROSITE_profiles:PS50850,PANTHER:PTHR11388,PANTHER:PTHR11388:SF82,Pfam:PF03137,TIGRFAM:TIGR00805,Superfamily:SSF103473	-	ENST00000256958.3:c.125C>A	ENSP00000256958.2:p.Thr42Lys	-	-	-	-	-	-
	12:21172690:C:T	chr12:21172690	T	ENSG00000134538	ENST00000256958	Transcript	missense_variant	229	125	42	T/I	aCa/aTa	rs576786579	MODERATE	-	1	-	SNV	SLCO1B1	HGNC	HGNC:10959	protein_coding	YES	NM_006446.5	-	1	P1	CCDS8685.1	ENSP00000256958	Q9Y6L6.181	A0A024RAU7.41	UPI0000043BED	-	-	1	deleterious(0.05)	benign(0.014)	2023-03-15	-	Transmembrane_helices:TMhelix,PROSITE_profiles:PS50850,PANTHER:PTHR11388,PANTHER:PTHR11388:SF82,Pfam:PF03137,TIGRFAM:TIGR00805,Superfamily:SSF103473	-	ENST00000256958.3:c.125C>T	ENSP00000256958.2:p.Thr42Ile	-	0.0002	0.0008	0	0	0
	12:21172692:C:A	chr12:21172692	A	ENSG00000134538	ENST00000256958	Transcript	missense_variant	231	127	43	L/I	Cta/Ata	rs746610546	MODERATE	-	1	-	SNV	SLCO1B1	HGNC	HGNC:10959	protein_coding	YES	NM_006446.5	-	1	P1	CCDS8685.1	ENSP00000256958	Q9Y6L6.181	A0A024RAU7.41	UPI0000043BED	-	-	1	tolerated(0.08)	possibly_damaging(0.764)	2023-03-15	-	Transmembrane_helices:TMhelix,PROSITE_profiles:PS50850,PANTHER:PTHR11388,PANTHER:PTHR11388:SF82,Pfam:PF03137,TIGRFAM:TIGR00805,Superfamily:SSF103473	-	ENST00000256958.3:c.127C>A	ENSP00000256958.2:p.Leu43Ile	-	-	-	-	-	-
	12:21172693:T:C	chr12:21172693	C	ENSG00000134538	ENST00000256958	Transcript	missense_variant	232	128	43	L/P	cTa/cCa	rs770472561	MODERATE	-	1	-	SNV	SLCO1B1	HGNC	HGNC:10959	protein_coding	YES	NM_006446.5	-	1	P1	CCDS8685.1	ENSP00000256958	Q9Y6L6.181	A0A024RAU7.41	UPI0000043BED	-	-	1	deleterious(0)	probably_damaging(0.996)	2023-03-15	-	Transmembrane_helices:TMhelix,PROSITE_profiles:PS50850,PANTHER:PTHR11388,PANTHER:PTHR11388:SF82,Pfam:PF03137,TIGRFAM:TIGR00805,Superfamily:SSF103473	-	ENST00000256958.3:c.128T>C	ENSP00000256958.2:p.Leu43Pro	-	-	-	-	-	-
	12:21172694:AG:A	chr12:21172695	-	ENSG00000134538	ENST00000256958	Transcript	frameshift_variant	234	130	44	G/X	Ggt/gt	-	HIGH	-	1	-	deletion	SLCO1B1	HGNC	HGNC:10959	protein_coding	YES	NM_006446.5	-	1	P1	CCDS8685.1	ENSP00000256958	Q9Y6L6.181	A0A024RAU7.41	UPI0000043BED	-	-	1	-	-	2023-03-15	-	Transmembrane_helices:TMhelix,PROSITE_profiles:PS50850,PANTHER:PTHR11388,PANTHER:PTHR11388:SF82,Pfam:PF03137,TIGRFAM:TIGR00805,Superfamily:SSF103473	-	ENST00000256958.3:c.131del	ENSP00000256958.2:p.Gly44ValfsTer5	1	-	-	-	-	-
	12:21172697:T:G	chr12:21172697	G	ENSG00000134538	ENST00000256958	Transcript	synonymous_variant	236	132	44	G	ggT/ggG	rs1342777436	LOW	-	1	-	SNV	SLCO1B1	HGNC	HGNC:10959	protein_coding	YES	NM_006446.5	-	1	P1	CCDS8685.1	ENSP00000256958	Q9Y6L6.181	A0A024RAU7.41	UPI0000043BED	-	-	1	-	-	2023-03-15	-	Transmembrane_helices:TMhelix,PROSITE_profiles:PS50850,PANTHER:PTHR11388,PANTHER:PTHR11388:SF82,Pfam:PF03137,TIGRFAM:TIGR00805,Superfamily:SSF103473	-	ENST00000256958.3:c.132T>G	ENSP00000256958.2:p.Gly44%3D	-	-	-	-	-	-
	12:21172698:G:A	chr12:21172698	A	ENSG00000134538	ENST00000256958	Transcript	missense_variant	237	133	45	A/T	Gca/Aca	rs555367334,COSV57009875,COSV57011549	MODERATE	-	1	-	SNV	SLCO1B1	HGNC	HGNC:10959	protein_coding	YES	NM_006446.5	-	1	P1	CCDS8685.1	ENSP00000256958	Q9Y6L6.181	A0A024RAU7.41	UPI0000043BED	-	-	1	deleterious(0.04)	benign(0.057)	2023-03-15	-	Transmembrane_helices:TMhelix,PROSITE_profiles:PS50850,PANTHER:PTHR11388,PANTHER:PTHR11388:SF82,Pfam:PF03137,TIGRFAM:TIGR00805,Superfamily:SSF103473	-	ENST00000256958.3:c.133G>A	ENSP00000256958.2:p.Ala45Thr	-	0.0004	0	0.0029	0	0
	12:21172700:AATT:A	chr12:21172701-21172703	-	ENSG00000134538	ENST00000256958	Transcript	inframe_deletion	240-242	136-138	46	I/-	ATT/-	-	MODERATE	-	1	-	deletion	SLCO1B1	HGNC	HGNC:10959	protein_coding	YES	NM_006446.5	-	1	P1	CCDS8685.1	ENSP00000256958	Q9Y6L6.181	A0A024RAU7.41	UPI0000043BED	-	-	1	-	-	2023-03-15	-	Transmembrane_helices:TMhelix,PROSITE_profiles:PS50850,PANTHER:PTHR11388,PANTHER:PTHR11388:SF82,Pfam:PF03137,TIGRFAM:TIGR00805,Superfamily:SSF103473	-	ENST00000256958.3:c.141_143del	ENSP00000256958.2:p.Ile47del	5	-	-	-	-	-
	12:21172701:A:G	chr12:21172701	G	ENSG00000134538	ENST00000256958	Transcript	missense_variant	240	136	46	I/V	Att/Gtt	-	MODERATE	-	1	-	SNV	SLCO1B1	HGNC	HGNC:10959	protein_coding	YES	NM_006446.5	-	1	P1	CCDS8685.1	ENSP00000256958	Q9Y6L6.181	A0A024RAU7.41	UPI0000043BED	-	-	1	tolerated(0.85)	benign(0)	2023-03-15	-	Transmembrane_helices:TMhelix,PROSITE_profiles:PS50850,PANTHER:PTHR11388,PANTHER:PTHR11388:SF82,Pfam:PF03137,TIGRFAM:TIGR00805,Superfamily:SSF103473	-	ENST00000256958.3:c.136A>G	ENSP00000256958.2:p.Ile46Val	-	-	-	-	-	-
	12:21172709:G:C	chr12:21172709	C	ENSG00000134538	ENST00000256958	Transcript	missense_variant	248	144	48	M/I	atG/atC	COSV57015999	MODERATE	-	1	-	SNV	SLCO1B1	HGNC	HGNC:10959	protein_coding	YES	NM_006446.5	-	1	P1	CCDS8685.1	ENSP00000256958	Q9Y6L6.181	A0A024RAU7.41	UPI0000043BED	-	-	1	deleterious(0)	possibly_damaging(0.838)	2023-03-15	-	Transmembrane_helices:TMhelix,PROSITE_profiles:PS50850,PANTHER:PTHR11388,PANTHER:PTHR11388:SF82,Pfam:PF03137,TIGRFAM:TIGR00805,Superfamily:SSF103473	-	ENST00000256958.3:c.144G>C	ENSP00000256958.2:p.Met48Ile	-	-	-	-	-	-
	12:21172717:C:T	chr12:21172717	T	ENSG00000134538	ENST00000256958	Transcript	missense_variant	256	152	51	S/F	tCc/tTc	rs769900186,COSV57009899,COSV57013802	MODERATE	-	1	-	SNV	SLCO1B1	HGNC	HGNC:10959	protein_coding	YES	NM_006446.5	-	1	P1	CCDS8685.1	ENSP00000256958	Q9Y6L6.181	A0A024RAU7.41	UPI0000043BED	-	-	1	deleterious(0.01)	probably_damaging(0.953)	2023-03-15	-	Transmembrane_helices:TMhelix,PROSITE_profiles:PS50850,PANTHER:PTHR11388,PANTHER:PTHR11388:SF82,Pfam:PF03137,TIGRFAM:TIGR00805,Superfamily:SSF103473	-	ENST00000256958.3:c.152C>T	ENSP00000256958.2:p.Ser51Phe	-	-	-	-	-	-
	12:21172719:A:G	chr12:21172719	G	ENSG00000134538	ENST00000256958	Transcript	missense_variant	258	154	52	I/V	Atc/Gtc	rs762874802	MODERATE	-	1	-	SNV	SLCO1B1	HGNC	HGNC:10959	protein_coding	YES	NM_006446.5	-	1	P1	CCDS8685.1	ENSP00000256958	Q9Y6L6.181	A0A024RAU7.41	UPI0000043BED	-	-	1	deleterious(0.02)	benign(0.302)	2023-03-15	-	Transmembrane_helices:TMhelix,PROSITE_profiles:PS50850,PANTHER:PTHR11388,PANTHER:PTHR11388:SF82,Pfam:PF03137,TIGRFAM:TIGR00805,Superfamily:SSF103473	-	ENST00000256958.3:c.154A>G	ENSP00000256958.2:p.Ile52Val	-	-	-	-	-	-
	12:21172719:A:T	chr12:21172719	T	ENSG00000134538	ENST00000256958	Transcript	missense_variant	258	154	52	I/F	Atc/Ttc	rs762874802	MODERATE	-	1	-	SNV	SLCO1B1	HGNC	HGNC:10959	protein_coding	YES	NM_006446.5	-	1	P1	CCDS8685.1	ENSP00000256958	Q9Y6L6.181	A0A024RAU7.41	UPI0000043BED	-	-	1	deleterious(0)	possibly_damaging(0.466)	2023-03-15	-	Transmembrane_helices:TMhelix,PROSITE_profiles:PS50850,PANTHER:PTHR11388,PANTHER:PTHR11388:SF82,Pfam:PF03137,TIGRFAM:TIGR00805,Superfamily:SSF103473	-	ENST00000256958.3:c.154A>T	ENSP00000256958.2:p.Ile52Phe	-	-	-	-	-	-
	12:21172720:T:C	chr12:21172720	C	ENSG00000134538	ENST00000256958	Transcript	missense_variant	259	155	52	I/T	aTc/aCc	rs937855856	MODERATE	-	1	-	SNV	SLCO1B1	HGNC	HGNC:10959	protein_coding	YES	NM_006446.5	-	1	P1	CCDS8685.1	ENSP00000256958	Q9Y6L6.181	A0A024RAU7.41	UPI0000043BED	-	-	1	deleterious(0.02)	benign(0.364)	2023-03-15	-	Transmembrane_helices:TMhelix,PROSITE_profiles:PS50850,PANTHER:PTHR11388,PANTHER:PTHR11388:SF82,Pfam:PF03137,TIGRFAM:TIGR00805,Superfamily:SSF103473	-	ENST00000256958.3:c.155T>C	ENSP00000256958.2:p.Ile52Thr	-	-	-	-	-	-
	12:21172722:A:G	chr12:21172722	G	ENSG00000134538	ENST00000256958	Transcript	missense_variant	261	157	53	I/V	Att/Gtt	-	MODERATE	-	1	-	SNV	SLCO1B1	HGNC	HGNC:10959	protein_coding	YES	NM_006446.5	-	1	P1	CCDS8685.1	ENSP00000256958	Q9Y6L6.181	A0A024RAU7.41	UPI0000043BED	-	-	1	deleterious(0.01)	benign(0.02)	2023-03-15	-	PROSITE_profiles:PS50850,PANTHER:PTHR11388,PANTHER:PTHR11388:SF82,Pfam:PF03137,TIGRFAM:TIGR00805,Superfamily:SSF103473	-	ENST00000256958.3:c.157A>G	ENSP00000256958.2:p.Ile53Val	-	-	-	-	-	-
	12:21172724:TCATATAGAACG:T	chr12:21172725-21172735	-	ENSG00000134538	ENST00000256958	Transcript	frameshift_variant	264-274	160-170	54-57	HIER/X	CATATAGAACGg/g	-	HIGH	-	1	-	deletion	SLCO1B1	HGNC	HGNC:10959	protein_coding	YES	NM_006446.5	-	1	P1	CCDS8685.1	ENSP00000256958	Q9Y6L6.181	A0A024RAU7.41	UPI0000043BED	-	-	1	-	-	2023-03-15	-	PROSITE_profiles:PS50850,PANTHER:PTHR11388,PANTHER:PTHR11388:SF82,Pfam:PF03137,TIGRFAM:TIGR00805,Superfamily:SSF103473	-	ENST00000256958.3:c.160_170del	ENSP00000256958.2:p.His54GlufsTer3	-	-	-	-	-	-
	12:21172727:T:C	chr12:21172727	C	ENSG00000134538	ENST00000256958	Transcript	synonymous_variant	266	162	54	H	caT/caC	-	LOW	-	1	-	SNV	SLCO1B1	HGNC	HGNC:10959	protein_coding	YES	NM_006446.5	-	1	P1	CCDS8685.1	ENSP00000256958	Q9Y6L6.181	A0A024RAU7.41	UPI0000043BED	-	-	1	-	-	2023-03-15	-	PROSITE_profiles:PS50850,PANTHER:PTHR11388,PANTHER:PTHR11388:SF82,Pfam:PF03137,TIGRFAM:TIGR00805,Superfamily:SSF103473	-	ENST00000256958.3:c.162T>C	ENSP00000256958.2:p.His54%3D	-	-	-	-	-	-
	12:21172728:A:G	chr12:21172728	G	ENSG00000134538	ENST00000256958	Transcript	missense_variant	267	163	55	I/V	Ata/Gta	rs915159194	MODERATE	-	1	-	SNV	SLCO1B1	HGNC	HGNC:10959	protein_coding	YES	NM_006446.5	-	1	P1	CCDS8685.1	ENSP00000256958	Q9Y6L6.181	A0A024RAU7.41	UPI0000043BED	-	-	1	deleterious(0)	probably_damaging(0.971)	2023-03-15	-	PROSITE_profiles:PS50850,PANTHER:PTHR11388,PANTHER:PTHR11388:SF82,Pfam:PF03137,TIGRFAM:TIGR00805,Superfamily:SSF103473	-	ENST00000256958.3:c.163A>G	ENSP00000256958.2:p.Ile55Val	-	-	-	-	-	-
	12:21172734:C:T	chr12:21172734	T	ENSG00000134538	ENST00000256958	Transcript	missense_variant	273	169	57	R/W	Cgg/Tgg	rs139257324,CM120188,COSV57007990	MODERATE	-	1	-	SNV	SLCO1B1	HGNC	HGNC:10959	protein_coding	YES	NM_006446.5	-	1	P1	CCDS8685.1	ENSP00000256958	Q9Y6L6.181	A0A024RAU7.41	UPI0000043BED	-	-	1	deleterious(0)	probably_damaging(1)	2023-03-15	-	PROSITE_profiles:PS50850,PANTHER:PTHR11388,PANTHER:PTHR11388:SF82,Pfam:PF03137,TIGRFAM:TIGR00805,Superfamily:SSF103473	-	ENST00000256958.3:c.169C>T	ENSP00000256958.2:p.Arg57Trp	-	-	-	-	-	-
	12:21172735:G:A	chr12:21172735	A	ENSG00000134538	ENST00000256958	Transcript	missense_variant	274	170	57	R/Q	cGg/cAg	rs61760182,COSV57015117	MODERATE	-	1	-	SNV	SLCO1B1	HGNC	HGNC:10959	protein_coding	YES	NM_006446.5	-	1	P1	CCDS8685.1	ENSP00000256958	Q9Y6L6.181	A0A024RAU7.41	UPI0000043BED	-	-	1	deleterious(0)	probably_damaging(0.999)	2023-03-15	-	PROSITE_profiles:PS50850,PANTHER:PTHR11388,PANTHER:PTHR11388:SF82,Pfam:PF03137,TIGRFAM:TIGR00805,Superfamily:SSF103473	-	ENST00000256958.3:c.170G>A	ENSP00000256958.2:p.Arg57Gln	-	0.0002	0	0	0	0
	12:21172738:G:T	chr12:21172738	T	ENSG00000134538	ENST00000256958	Transcript	missense_variant	277	173	58	R/I	aGa/aTa	rs891798349	MODERATE	-	1	-	SNV	SLCO1B1	HGNC	HGNC:10959	protein_coding	YES	NM_006446.5	-	1	P1	CCDS8685.1	ENSP00000256958	Q9Y6L6.181	A0A024RAU7.41	UPI0000043BED	-	-	1	deleterious(0)	probably_damaging(0.999)	2023-03-15	-	PROSITE_profiles:PS50850,PANTHER:PTHR11388,PANTHER:PTHR11388:SF82,Pfam:PF03137,TIGRFAM:TIGR00805,Superfamily:SSF103473	-	ENST00000256958.3:c.173G>T	ENSP00000256958.2:p.Arg58Ile	-	-	-	-	-	-
	12:21172740:T:C	chr12:21172740	C	ENSG00000134538	ENST00000256958	Transcript	missense_variant	279	175	59	F/L	Ttt/Ctt	rs756167965	MODERATE	-	1	-	SNV	SLCO1B1	HGNC	HGNC:10959	protein_coding	YES	NM_006446.5	-	1	P1	CCDS8685.1	ENSP00000256958	Q9Y6L6.181	A0A024RAU7.41	UPI0000043BED	-	-	1	deleterious(0)	probably_damaging(1)	2023-03-15	-	PROSITE_profiles:PS50850,PANTHER:PTHR11388,PANTHER:PTHR11388:SF82,Pfam:PF03137,TIGRFAM:TIGR00805,Superfamily:SSF103473	-	ENST00000256958.3:c.175T>C	ENSP00000256958.2:p.Phe59Leu	-	-	-	-	-	-
	12:21172746:A:T	chr12:21172746	T	ENSG00000134538	ENST00000256958	Transcript	missense_variant	285	181	61	I/L	Ata/Tta	-	MODERATE	-	1	-	SNV	SLCO1B1	HGNC	HGNC:10959	protein_coding	YES	NM_006446.5	-	1	P1	CCDS8685.1	ENSP00000256958	Q9Y6L6.181	A0A024RAU7.41	UPI0000043BED	-	-	1	tolerated(0.36)	benign(0.317)	2023-03-15	-	PROSITE_profiles:PS50850,PANTHER:PTHR11388,PANTHER:PTHR11388:SF82,Pfam:PF03137,TIGRFAM:TIGR00805,Superfamily:SSF103473	-	ENST00000256958.3:c.181A>T	ENSP00000256958.2:p.Ile61Leu	-	-	-	-	-	-
	12:21172747:T:C	chr12:21172747	C	ENSG00000134538	ENST00000256958	Transcript	missense_variant	286	182	61	I/T	aTa/aCa	-	MODERATE	-	1	-	SNV	SLCO1B1	HGNC	HGNC:10959	protein_coding	YES	NM_006446.5	-	1	P1	CCDS8685.1	ENSP00000256958	Q9Y6L6.181	A0A024RAU7.41	UPI0000043BED	-	-	1	tolerated(0.08)	possibly_damaging(0.859)	2023-03-15	-	PROSITE_profiles:PS50850,PANTHER:PTHR11388,PANTHER:PTHR11388:SF82,Pfam:PF03137,TIGRFAM:TIGR00805,Superfamily:SSF103473	-	ENST00000256958.3:c.182T>C	ENSP00000256958.2:p.Ile61Thr	-	-	-	-	-	-
	12:21172750:C:T	chr12:21172750	T	ENSG00000134538	ENST00000256958	Transcript	missense_variant	289	185	62	S/F	tCc/tTc	COSV57009624	MODERATE	-	1	-	SNV	SLCO1B1	HGNC	HGNC:10959	protein_coding	YES	NM_006446.5	-	1	P1	CCDS8685.1	ENSP00000256958	Q9Y6L6.181	A0A024RAU7.41	UPI0000043BED	-	-	1	deleterious(0.01)	probably_damaging(0.951)	2023-03-15	-	PROSITE_profiles:PS50850,PANTHER:PTHR11388,PANTHER:PTHR11388:SF82,Pfam:PF03137,TIGRFAM:TIGR00805,Superfamily:SSF103473	-	ENST00000256958.3:c.185C>T	ENSP00000256958.2:p.Ser62Phe	-	-	-	-	-	-
	12:21172751:C:T	chr12:21172751	T	ENSG00000134538	ENST00000256958	Transcript	synonymous_variant	290	186	62	S	tcC/tcT	-	LOW	-	1	-	SNV	SLCO1B1	HGNC	HGNC:10959	protein_coding	YES	NM_006446.5	-	1	P1	CCDS8685.1	ENSP00000256958	Q9Y6L6.181	A0A024RAU7.41	UPI0000043BED	-	-	1	-	-	2023-03-15	-	PROSITE_profiles:PS50850,PANTHER:PTHR11388,PANTHER:PTHR11388:SF82,Pfam:PF03137,TIGRFAM:TIGR00805,Superfamily:SSF103473	-	ENST00000256958.3:c.186C>T	ENSP00000256958.2:p.Ser62%3D	-	-	-	-	-	-
	12:21172753:C:T	chr12:21172753	T	ENSG00000134538	ENST00000256958	Transcript	missense_variant	292	188	63	S/F	tCt/tTt	-	MODERATE	-	1	-	SNV	SLCO1B1	HGNC	HGNC:10959	protein_coding	YES	NM_006446.5	-	1	P1	CCDS8685.1	ENSP00000256958	Q9Y6L6.181	A0A024RAU7.41	UPI0000043BED	-	-	1	deleterious(0)	probably_damaging(0.997)	2023-03-15	-	PROSITE_profiles:PS50850,PANTHER:PTHR11388,PANTHER:PTHR11388:SF82,Pfam:PF03137,TIGRFAM:TIGR00805,Superfamily:SSF103473	-	ENST00000256958.3:c.188C>T	ENSP00000256958.2:p.Ser63Phe	-	-	-	-	-	-
	12:21172758:C:G	chr12:21172758	G	ENSG00000134538	ENST00000256958	Transcript	missense_variant	297	193	65	L/V	Ctt/Gtt	rs766895771,COSV99918601,COSV99918881	MODERATE	-	1	-	SNV	SLCO1B1	HGNC	HGNC:10959	protein_coding	YES	NM_006446.5	-	1	P1	CCDS8685.1	ENSP00000256958	Q9Y6L6.181	A0A024RAU7.41	UPI0000043BED	-	-	1	tolerated(1)	benign(0.074)	2023-03-15	-	PROSITE_profiles:PS50850,PANTHER:PTHR11388,PANTHER:PTHR11388:SF82,Pfam:PF03137,TIGRFAM:TIGR00805,Superfamily:SSF103473	-	ENST00000256958.3:c.193C>G	ENSP00000256958.2:p.Leu65Val	-	-	-	-	-	-
	12:21172758:C:T	chr12:21172758	T	ENSG00000134538	ENST00000256958	Transcript	missense_variant	297	193	65	L/F	Ctt/Ttt	COSV99918601,COSV99918881	MODERATE	-	1	-	SNV	SLCO1B1	HGNC	HGNC:10959	protein_coding	YES	NM_006446.5	-	1	P1	CCDS8685.1	ENSP00000256958	Q9Y6L6.181	A0A024RAU7.41	UPI0000043BED	-	-	1	tolerated(0.28)	probably_damaging(0.913)	2023-03-15	-	PROSITE_profiles:PS50850,PANTHER:PTHR11388,PANTHER:PTHR11388:SF82,Pfam:PF03137,TIGRFAM:TIGR00805,Superfamily:SSF103473	-	ENST00000256958.3:c.193C>T	ENSP00000256958.2:p.Leu65Phe	-	-	-	-	-	-
	12:21172759:T:G	chr12:21172759	G	ENSG00000134538	ENST00000256958	Transcript	missense_variant	298	194	65	L/R	cTt/cGt	-	MODERATE	-	1	-	SNV	SLCO1B1	HGNC	HGNC:10959	protein_coding	YES	NM_006446.5	-	1	P1	CCDS8685.1	ENSP00000256958	Q9Y6L6.181	A0A024RAU7.41	UPI0000043BED	-	-	1	tolerated(0.09)	possibly_damaging(0.845)	2023-03-15	-	PROSITE_profiles:PS50850,PANTHER:PTHR11388,PANTHER:PTHR11388:SF82,Pfam:PF03137,TIGRFAM:TIGR00805,Superfamily:SSF103473	-	ENST00000256958.3:c.194T>G	ENSP00000256958.2:p.Leu65Arg	-	-	-	-	-	-
	12:21172761:G:A	chr12:21172761	A	ENSG00000134538	ENST00000256958	Transcript	missense_variant	300	196	66	V/I	Gtt/Att	-	MODERATE	-	1	-	SNV	SLCO1B1	HGNC	HGNC:10959	protein_coding	YES	NM_006446.5	-	1	P1	CCDS8685.1	ENSP00000256958	Q9Y6L6.181	A0A024RAU7.41	UPI0000043BED	-	-	1	tolerated(0.21)	benign(0.091)	2023-03-15	-	PROSITE_profiles:PS50850,PANTHER:PTHR11388,PANTHER:PTHR11388:SF82,Pfam:PF03137,TIGRFAM:TIGR00805,Superfamily:SSF103473	-	ENST00000256958.3:c.196G>A	ENSP00000256958.2:p.Val66Ile	-	-	-	-	-	-
	12:21172764:G:A	chr12:21172764	A	ENSG00000134538	ENST00000256958	Transcript	missense_variant	303	199	67	G/S	Ggt/Agt	-	MODERATE	-	1	-	SNV	SLCO1B1	HGNC	HGNC:10959	protein_coding	YES	NM_006446.5	-	1	P1	CCDS8685.1	ENSP00000256958	Q9Y6L6.181	A0A024RAU7.41	UPI0000043BED	-	-	1	deleterious(0)	probably_damaging(0.999)	2023-03-15	-	Transmembrane_helices:TMhelix,PROSITE_profiles:PS50850,PANTHER:PTHR11388,PANTHER:PTHR11388:SF82,Pfam:PF03137,TIGRFAM:TIGR00805,Superfamily:SSF103473	-	ENST00000256958.3:c.199G>A	ENSP00000256958.2:p.Gly67Ser	-	-	-	-	-	-
	12:21172765:G:A	chr12:21172765	A	ENSG00000134538	ENST00000256958	Transcript	missense_variant	304	200	67	G/D	gGt/gAt	COSV99918611	MODERATE	-	1	-	SNV	SLCO1B1	HGNC	HGNC:10959	protein_coding	YES	NM_006446.5	-	1	P1	CCDS8685.1	ENSP00000256958	Q9Y6L6.181	A0A024RAU7.41	UPI0000043BED	-	-	1	deleterious(0)	probably_damaging(1)	2023-03-15	-	Transmembrane_helices:TMhelix,PROSITE_profiles:PS50850,PANTHER:PTHR11388,PANTHER:PTHR11388:SF82,Pfam:PF03137,TIGRFAM:TIGR00805,Superfamily:SSF103473	-	ENST00000256958.3:c.200G>A	ENSP00000256958.2:p.Gly67Asp	-	-	-	-	-	-
	12:21172765:G:C	chr12:21172765	C	ENSG00000134538	ENST00000256958	Transcript	missense_variant	304	200	67	G/A	gGt/gCt	rs754273982,COSV99918611	MODERATE	-	1	-	SNV	SLCO1B1	HGNC	HGNC:10959	protein_coding	YES	NM_006446.5	-	1	P1	CCDS8685.1	ENSP00000256958	Q9Y6L6.181	A0A024RAU7.41	UPI0000043BED	-	-	1	deleterious(0)	probably_damaging(0.996)	2023-03-15	-	Transmembrane_helices:TMhelix,PROSITE_profiles:PS50850,PANTHER:PTHR11388,PANTHER:PTHR11388:SF82,Pfam:PF03137,TIGRFAM:TIGR00805,Superfamily:SSF103473	-	ENST00000256958.3:c.200G>C	ENSP00000256958.2:p.Gly67Ala	-	-	-	-	-	-
	12:21172771:T:C	chr12:21172771	C	ENSG00000134538	ENST00000256958	Transcript	missense_variant	310	206	69	I/T	aTt/aCt	rs755346572	MODERATE	-	1	-	SNV	SLCO1B1	HGNC	HGNC:10959	protein_coding	YES	NM_006446.5	-	1	P1	CCDS8685.1	ENSP00000256958	Q9Y6L6.181	A0A024RAU7.41	UPI0000043BED	-	-	1	deleterious(0)	probably_damaging(0.987)	2023-03-15	-	Transmembrane_helices:TMhelix,PROSITE_profiles:PS50850,PANTHER:PTHR11388,PANTHER:PTHR11388:SF82,Pfam:PF03137,TIGRFAM:TIGR00805,Superfamily:SSF103473	-	ENST00000256958.3:c.206T>C	ENSP00000256958.2:p.Ile69Thr	-	-	-	-	-	-
	12:21172775:C:T	chr12:21172775	T	ENSG00000134538	ENST00000256958	Transcript	synonymous_variant	314	210	70	D	gaC/gaT	rs148697674,COSV57013163	LOW	-	1	-	SNV	SLCO1B1	HGNC	HGNC:10959	protein_coding	YES	NM_006446.5	-	1	P1	CCDS8685.1	ENSP00000256958	Q9Y6L6.181	A0A024RAU7.41	UPI0000043BED	-	-	1	-	-	2023-03-15	-	Transmembrane_helices:TMhelix,PROSITE_profiles:PS50850,PANTHER:PTHR11388,PANTHER:PTHR11388:SF82,Pfam:PF03137,TIGRFAM:TIGR00805,Superfamily:SSF103473	-	ENST00000256958.3:c.210C>T	ENSP00000256958.2:p.Asp70%3D	-	-	-	-	-	-
	12:21172776:G:A	chr12:21172776	A	ENSG00000134538	ENST00000256958	Transcript	missense_variant	315	211	71	G/R	Gga/Aga	rs373327528,CM120189	MODERATE	-	1	-	SNV	SLCO1B1	HGNC	HGNC:10959	protein_coding	YES	NM_006446.5	-	1	P1	CCDS8685.1	ENSP00000256958	Q9Y6L6.181	A0A024RAU7.41	UPI0000043BED	-	-	1	deleterious(0)	probably_damaging(1)	2023-03-15	-	Transmembrane_helices:TMhelix,PROSITE_profiles:PS50850,PANTHER:PTHR11388,PANTHER:PTHR11388:SF82,Pfam:PF03137,TIGRFAM:TIGR00805,Superfamily:SSF103473	-	ENST00000256958.3:c.211G>A	ENSP00000256958.2:p.Gly71Arg	-	-	-	-	-	-
	12:21172776:G:T	chr12:21172776	T	ENSG00000134538	ENST00000256958	Transcript	stop_gained	315	211	71	G/*	Gga/Tga	CM120189	HIGH	-	1	-	SNV	SLCO1B1	HGNC	HGNC:10959	protein_coding	YES	NM_006446.5	-	1	P1	CCDS8685.1	ENSP00000256958	Q9Y6L6.181	A0A024RAU7.41	UPI0000043BED	-	-	1	-	-	2023-03-15	-	Transmembrane_helices:TMhelix,PROSITE_profiles:PS50850,PANTHER:PTHR11388,PANTHER:PTHR11388:SF82,Pfam:PF03137,TIGRFAM:TIGR00805,Superfamily:SSF103473	-	ENST00000256958.3:c.211G>T	ENSP00000256958.2:p.Gly71Ter	-	-	-	-	-	-
	12:21172777:G:A	chr12:21172777	A	ENSG00000134538	ENST00000256958	Transcript	missense_variant	316	212	71	G/E	gGa/gAa	rs540723056	MODERATE	-	1	-	SNV	SLCO1B1	HGNC	HGNC:10959	protein_coding	YES	NM_006446.5	-	1	P1	CCDS8685.1	ENSP00000256958	Q9Y6L6.181	A0A024RAU7.41	UPI0000043BED	-	-	1	deleterious(0)	probably_damaging(1)	2023-03-15	-	Transmembrane_helices:TMhelix,PROSITE_profiles:PS50850,PANTHER:PTHR11388,PANTHER:PTHR11388:SF82,Pfam:PF03137,TIGRFAM:TIGR00805,Superfamily:SSF103473	-	ENST00000256958.3:c.212G>A	ENSP00000256958.2:p.Gly71Glu	-	0.0002	0	0	0	0
	12:21172777:G:T	chr12:21172777	T	ENSG00000134538	ENST00000256958	Transcript	missense_variant	316	212	71	G/V	gGa/gTa	rs540723056	MODERATE	-	1	-	SNV	SLCO1B1	HGNC	HGNC:10959	protein_coding	YES	NM_006446.5	-	1	P1	CCDS8685.1	ENSP00000256958	Q9Y6L6.181	A0A024RAU7.41	UPI0000043BED	-	-	1	deleterious(0)	probably_damaging(1)	2023-03-15	-	Transmembrane_helices:TMhelix,PROSITE_profiles:PS50850,PANTHER:PTHR11388,PANTHER:PTHR11388:SF82,Pfam:PF03137,TIGRFAM:TIGR00805,Superfamily:SSF103473	-	ENST00000256958.3:c.212G>T	ENSP00000256958.2:p.Gly71Val	-	-	-	-	-	-
	12:21172780:G:A	chr12:21172780	A	ENSG00000134538	ENST00000256958	Transcript	missense_variant	319	215	72	S/N	aGc/aAc	rs780686282	MODERATE	-	1	-	SNV	SLCO1B1	HGNC	HGNC:10959	protein_coding	YES	NM_006446.5	-	1	P1	CCDS8685.1	ENSP00000256958	Q9Y6L6.181	A0A024RAU7.41	UPI0000043BED	-	-	1	deleterious(0.01)	probably_damaging(0.99)	2023-03-15	-	Transmembrane_helices:TMhelix,PROSITE_profiles:PS50850,PANTHER:PTHR11388,PANTHER:PTHR11388:SF82,Pfam:PF03137,TIGRFAM:TIGR00805,Superfamily:SSF103473	-	ENST00000256958.3:c.215G>A	ENSP00000256958.2:p.Ser72Asn	-	-	-	-	-	-
	12:21172788:A:G	chr12:21172788	G	ENSG00000134538	ENST00000256958	Transcript	missense_variant	327	223	75	I/V	Att/Gtt	rs752751282	MODERATE	-	1	-	SNV	SLCO1B1	HGNC	HGNC:10959	protein_coding	YES	NM_006446.5	-	1	P1	CCDS8685.1	ENSP00000256958	Q9Y6L6.181	A0A024RAU7.41	UPI0000043BED	-	-	1	deleterious(0.03)	possibly_damaging(0.612)	2023-03-15	-	Transmembrane_helices:TMhelix,PROSITE_profiles:PS50850,PANTHER:PTHR11388,PANTHER:PTHR11388:SF82,Pfam:PF03137,TIGRFAM:TIGR00805,Superfamily:SSF103473	-	ENST00000256958.3:c.223A>G	ENSP00000256958.2:p.Ile75Val	-	-	-	-	-	-
	12:21172792:G:A	chr12:21172792	A	ENSG00000134538	ENST00000256958	Transcript	splice_donor_variant	-	-	-	-	-	rs564217518	HIGH	-	1	-	SNV	SLCO1B1	HGNC	HGNC:10959	protein_coding	YES	NM_006446.5	-	1	P1	CCDS8685.1	ENSP00000256958	Q9Y6L6.181	A0A024RAU7.41	UPI0000043BED	-	-	1	-	-	-	2023-03-14	-	-	ENST00000256958.3:c.226+1G>A	-	-	0.0004	0	0	0	0
	12:21172793:T:C	chr12:21172793	C	ENSG00000134538	ENST00000256958	Transcript	splice_donor_variant	-	-	-	-	-	-	HIGH	-	1	-	SNV	SLCO1B1	HGNC	HGNC:10959	protein_coding	YES	NM_006446.5	-	1	P1	CCDS8685.1	ENSP00000256958	Q9Y6L6.181	A0A024RAU7.41	UPI0000043BED	-	-	1	-	-	-	2023-03-14	-	-	ENST00000256958.3:c.226+2T>C	-	-	-	-	-	-	-
	12:21172814:A:G	chr12:21172814	G	ENSG00000134538	ENST00000256958	Transcript	intron_variant	-	-	-	-	-	rs1418251144	MODIFIER	-	1	-	SNV	SLCO1B1	HGNC	HGNC:10959	protein_coding	YES	NM_006446.5	-	1	P1	CCDS8685.1	ENSP00000256958	Q9Y6L6.181	A0A024RAU7.41	UPI0000043BED	-	-	1	-	-	-	2023-03-14	-	-	ENST00000256958.3:c.226+23A>G	-	-	-	-	-	-	-
	12:21172815:T:A	chr12:21172815	A	ENSG00000134538	ENST00000256958	Transcript	intron_variant	-	-	-	-	-	-	MODIFIER	-	1	-	SNV	SLCO1B1	HGNC	HGNC:10959	protein_coding	YES	NM_006446.5	-	1	P1	CCDS8685.1	ENSP00000256958	Q9Y6L6.181	A0A024RAU7.41	UPI0000043BED	-	-	1	-	-	-	2023-03-14	-	-	ENST00000256958.3:c.226+24T>A	-	-	-	-	-	-	-
	12:21172816:A:G	chr12:21172816	G	ENSG00000134538	ENST00000256958	Transcript	intron_variant	-	-	-	-	-	-	MODIFIER	-	1	-	SNV	SLCO1B1	HGNC	HGNC:10959	protein_coding	YES	NM_006446.5	-	1	P1	CCDS8685.1	ENSP00000256958	Q9Y6L6.181	A0A024RAU7.41	UPI0000043BED	-	-	1	-	-	-	2023-03-14	-	-	ENST00000256958.3:c.226+25A>G	-	-	-	-	-	-	-
	12:21172825:T:C	chr12:21172825	C	ENSG00000134538	ENST00000256958	Transcript	intron_variant	-	-	-	-	-	-	MODIFIER	-	1	-	SNV	SLCO1B1	HGNC	HGNC:10959	protein_coding	YES	NM_006446.5	-	1	P1	CCDS8685.1	ENSP00000256958	Q9Y6L6.181	A0A024RAU7.41	UPI0000043BED	-	-	1	-	-	-	2023-03-14	-	-	ENST00000256958.3:c.226+34T>C	-	-	-	-	-	-	-
	12:21172826:G:C	chr12:21172826	C	ENSG00000134538	ENST00000256958	Transcript	intron_variant	-	-	-	-	-	rs200919323	MODIFIER	-	1	-	SNV	SLCO1B1	HGNC	HGNC:10959	protein_coding	YES	NM_006446.5	-	1	P1	CCDS8685.1	ENSP00000256958	Q9Y6L6.181	A0A024RAU7.41	UPI0000043BED	-	-	1	-	-	-	2023-03-14	-	-	ENST00000256958.3:c.226+35G>C	-	-	0.0072	0	0	0	0
	12:21172833:T:TA	chr12:21172833-21172834	A	ENSG00000134538	ENST00000256958	Transcript	intron_variant	-	-	-	-	-	rs71581983	MODIFIER	-	1	-	insertion	SLCO1B1	HGNC	HGNC:10959	protein_coding	YES	NM_006446.5	-	1	P1	CCDS8685.1	ENSP00000256958	Q9Y6L6.181	A0A024RAU7.41	UPI0000043BED	-	-	1	-	-	-	2023-03-14	-	-	ENST00000256958.3:c.226+48dup	-	-	-	-	-	-	-
	12:21172838:A:AT	chr12:21172838-21172839	T	ENSG00000134538	ENST00000256958	Transcript	intron_variant	-	-	-	-	-	rs1279719949	MODIFIER	-	1	-	insertion	SLCO1B1	HGNC	HGNC:10959	protein_coding	YES	NM_006446.5	-	1	P1	CCDS8685.1	ENSP00000256958	Q9Y6L6.181	A0A024RAU7.41	UPI0000043BED	-	-	1	-	-	-	2023-03-14	-	-	ENST00000256958.3:c.226+47_226+48insT	-	-	-	-	-	-	-
	12:21172840:T:C	chr12:21172840	C	ENSG00000134538	ENST00000256958	Transcript	intron_variant	-	-	-	-	-	rs774270172	MODIFIER	-	1	-	SNV	SLCO1B1	HGNC	HGNC:10959	protein_coding	YES	NM_006446.5	-	1	P1	CCDS8685.1	ENSP00000256958	Q9Y6L6.181	A0A024RAU7.41	UPI0000043BED	-	-	1	-	-	-	2023-03-14	-	-	ENST00000256958.3:c.226+49T>C	-	-	-	-	-	-	-
	12:21172841:A:G	chr12:21172841	G	ENSG00000134538	ENST00000256958	Transcript	intron_variant	-	-	-	-	-	rs761486574	MODIFIER	-	1	-	SNV	SLCO1B1	HGNC	HGNC:10959	protein_coding	YES	NM_006446.5	-	1	P1	CCDS8685.1	ENSP00000256958	Q9Y6L6.181	A0A024RAU7.41	UPI0000043BED	-	-	1	-	-	-	2023-03-14	-	-	ENST00000256958.3:c.226+50A>G	-	-	-	-	-	-	-
	12:21172843:A:C	chr12:21172843	C	ENSG00000134538	ENST00000256958	Transcript	intron_variant	-	-	-	-	-	-	MODIFIER	-	1	-	SNV	SLCO1B1	HGNC	HGNC:10959	protein_coding	YES	NM_006446.5	-	1	P1	CCDS8685.1	ENSP00000256958	Q9Y6L6.181	A0A024RAU7.41	UPI0000043BED	-	-	1	-	-	-	2023-03-14	-	-	ENST00000256958.3:c.226+52A>C	-	-	-	-	-	-	-
	12:21172843:A:G	chr12:21172843	G	ENSG00000134538	ENST00000256958	Transcript	intron_variant	-	-	-	-	-	rs773377142	MODIFIER	-	1	-	SNV	SLCO1B1	HGNC	HGNC:10959	protein_coding	YES	NM_006446.5	-	1	P1	CCDS8685.1	ENSP00000256958	Q9Y6L6.181	A0A024RAU7.41	UPI0000043BED	-	-	1	-	-	-	2023-03-14	-	-	ENST00000256958.3:c.226+52A>G	-	-	-	-	-	-	-
	12:21172845:A:G	chr12:21172845	G	ENSG00000134538	ENST00000256958	Transcript	intron_variant	-	-	-	-	-	rs1241330428	MODIFIER	-	1	-	SNV	SLCO1B1	HGNC	HGNC:10959	protein_coding	YES	NM_006446.5	-	1	P1	CCDS8685.1	ENSP00000256958	Q9Y6L6.181	A0A024RAU7.41	UPI0000043BED	-	-	1	-	-	-	2023-03-14	-	-	ENST00000256958.3:c.226+54A>G	-	-	-	-	-	-	-
	12:21172848:C:A	chr12:21172848	A	ENSG00000134538	ENST00000256958	Transcript	intron_variant	-	-	-	-	-	rs778441592	MODIFIER	-	1	-	SNV	SLCO1B1	HGNC	HGNC:10959	protein_coding	YES	NM_006446.5	-	1	P1	CCDS8685.1	ENSP00000256958	Q9Y6L6.181	A0A024RAU7.41	UPI0000043BED	-	-	1	-	-	-	2023-03-14	-	-	ENST00000256958.3:c.226+57C>A	-	-	-	-	-	-	-
	12:21172849:T:C	chr12:21172849	C	ENSG00000134538	ENST00000256958	Transcript	intron_variant	-	-	-	-	-	rs1195741657	MODIFIER	-	1	-	SNV	SLCO1B1	HGNC	HGNC:10959	protein_coding	YES	NM_006446.5	-	1	P1	CCDS8685.1	ENSP00000256958	Q9Y6L6.181	A0A024RAU7.41	UPI0000043BED	-	-	1	-	-	-	2023-03-14	-	-	ENST00000256958.3:c.226+58T>C	-	-	-	-	-	-	-
	12:21172851:T:C	chr12:21172851	C	ENSG00000134538	ENST00000256958	Transcript	intron_variant	-	-	-	-	-	-	MODIFIER	-	1	-	SNV	SLCO1B1	HGNC	HGNC:10959	protein_coding	YES	NM_006446.5	-	1	P1	CCDS8685.1	ENSP00000256958	Q9Y6L6.181	A0A024RAU7.41	UPI0000043BED	-	-	1	-	-	-	2023-03-14	-	-	ENST00000256958.3:c.226+60T>C	-	-	-	-	-	-	-
	12:21172861:G:A	chr12:21172861	A	ENSG00000134538	ENST00000256958	Transcript	intron_variant	-	-	-	-	-	rs747455315	MODIFIER	-	1	-	SNV	SLCO1B1	HGNC	HGNC:10959	protein_coding	YES	NM_006446.5	-	1	P1	CCDS8685.1	ENSP00000256958	Q9Y6L6.181	A0A024RAU7.41	UPI0000043BED	-	-	1	-	-	-	2023-03-14	-	-	ENST00000256958.3:c.226+70G>A	-	-	-	-	-	-	-
	12:21172861:G:T	chr12:21172861	T	ENSG00000134538	ENST00000256958	Transcript	intron_variant	-	-	-	-	-	-	MODIFIER	-	1	-	SNV	SLCO1B1	HGNC	HGNC:10959	protein_coding	YES	NM_006446.5	-	1	P1	CCDS8685.1	ENSP00000256958	Q9Y6L6.181	A0A024RAU7.41	UPI0000043BED	-	-	1	-	-	-	2023-03-14	-	-	ENST00000256958.3:c.226+70G>T	-	-	-	-	-	-	-
	12:21172862:T:C	chr12:21172862	C	ENSG00000134538	ENST00000256958	Transcript	intron_variant	-	-	-	-	-	-	MODIFIER	-	1	-	SNV	SLCO1B1	HGNC	HGNC:10959	protein_coding	YES	NM_006446.5	-	1	P1	CCDS8685.1	ENSP00000256958	Q9Y6L6.181	A0A024RAU7.41	UPI0000043BED	-	-	1	-	-	-	2023-03-14	-	-	ENST00000256958.3:c.226+71T>C	-	-	-	-	-	-	-
	12:21172864:A:G	chr12:21172864	G	ENSG00000134538	ENST00000256958	Transcript	intron_variant	-	-	-	-	-	rs563172528	MODIFIER	-	1	-	SNV	SLCO1B1	HGNC	HGNC:10959	protein_coding	YES	NM_006446.5	-	1	P1	CCDS8685.1	ENSP00000256958	Q9Y6L6.181	A0A024RAU7.41	UPI0000043BED	-	-	1	-	-	-	2023-03-14	-	-	ENST00000256958.3:c.226+73A>G	-	-	0.0004	0.0015	0	0	0
	12:21172869:C:G	chr12:21172869	G	ENSG00000134538	ENST00000256958	Transcript	intron_variant	-	-	-	-	-	-	MODIFIER	-	1	-	SNV	SLCO1B1	HGNC	HGNC:10959	protein_coding	YES	NM_006446.5	-	1	P1	CCDS8685.1	ENSP00000256958	Q9Y6L6.181	A0A024RAU7.41	UPI0000043BED	-	-	1	-	-	-	2023-03-14	-	-	ENST00000256958.3:c.226+78C>G	-	-	-	-	-	-	-
	12:21172871:G:A	chr12:21172871	A	ENSG00000134538	ENST00000256958	Transcript	intron_variant	-	-	-	-	-	-	MODIFIER	-	1	-	SNV	SLCO1B1	HGNC	HGNC:10959	protein_coding	YES	NM_006446.5	-	1	P1	CCDS8685.1	ENSP00000256958	Q9Y6L6.181	A0A024RAU7.41	UPI0000043BED	-	-	1	-	-	-	2023-03-14	-	-	ENST00000256958.3:c.226+80G>A	-	-	-	-	-	-	-
	12:21172873:G:A	chr12:21172873	A	ENSG00000134538	ENST00000256958	Transcript	intron_variant	-	-	-	-	-	rs1156923912	MODIFIER	-	1	-	SNV	SLCO1B1	HGNC	HGNC:10959	protein_coding	YES	NM_006446.5	-	1	P1	CCDS8685.1	ENSP00000256958	Q9Y6L6.181	A0A024RAU7.41	UPI0000043BED	-	-	1	-	-	-	2023-03-14	-	-	ENST00000256958.3:c.226+82G>A	-	-	-	-	-	-	-
	12:21172874:G:A	chr12:21172874	A	ENSG00000134538	ENST00000256958	Transcript	intron_variant	-	-	-	-	-	rs80006762	MODIFIER	-	1	-	SNV	SLCO1B1	HGNC	HGNC:10959	protein_coding	YES	NM_006446.5	-	1	P1	CCDS8685.1	ENSP00000256958	Q9Y6L6.181	A0A024RAU7.41	UPI0000043BED	-	-	1	-	-	-	2023-03-14	-	-	ENST00000256958.3:c.226+83G>A	-	-	0.0176	0.0643	0.0043	0	0
	12:21172877:A:T	chr12:21172877	T	ENSG00000134538	ENST00000256958	Transcript	intron_variant	-	-	-	-	-	-	MODIFIER	-	1	-	SNV	SLCO1B1	HGNC	HGNC:10959	protein_coding	YES	NM_006446.5	-	1	P1	CCDS8685.1	ENSP00000256958	Q9Y6L6.181	A0A024RAU7.41	UPI0000043BED	-	-	1	-	-	-	2023-03-14	-	-	ENST00000256958.3:c.226+86A>T	-	-	-	-	-	-	-
	12:21172880:T:G	chr12:21172880	G	ENSG00000134538	ENST00000256958	Transcript	intron_variant	-	-	-	-	-	rs2291073,COSV57015094	MODIFIER	-	1	-	SNV	SLCO1B1	HGNC	HGNC:10959	protein_coding	YES	NM_006446.5	-	1	P1	CCDS8685.1	ENSP00000256958	Q9Y6L6.181	A0A024RAU7.41	UPI0000043BED	-	-	1	-	-	-	2023-03-14	-	-	ENST00000256958.3:c.226+89T>G	-	-	0.2925	0.5938	0.1182	0.38	0.0905
	12:21172882:A:C	chr12:21172882	C	ENSG00000134538	ENST00000256958	Transcript	intron_variant	-	-	-	-	-	-	MODIFIER	-	1	-	SNV	SLCO1B1	HGNC	HGNC:10959	protein_coding	YES	NM_006446.5	-	1	P1	CCDS8685.1	ENSP00000256958	Q9Y6L6.181	A0A024RAU7.41	UPI0000043BED	-	-	1	-	-	-	2023-03-14	-	-	ENST00000256958.3:c.226+91A>C	-	-	-	-	-	-	-
	12:21172882:A:G	chr12:21172882	G	ENSG00000134538	ENST00000256958	Transcript	intron_variant	-	-	-	-	-	rs991797764	MODIFIER	-	1	-	SNV	SLCO1B1	HGNC	HGNC:10959	protein_coding	YES	NM_006446.5	-	1	P1	CCDS8685.1	ENSP00000256958	Q9Y6L6.181	A0A024RAU7.41	UPI0000043BED	-	-	1	-	-	-	2023-03-14	-	-	ENST00000256958.3:c.226+91A>G	-	-	-	-	-	-	-
	12:21174479:A:G	chr12:21174479	G	ENSG00000134538	ENST00000256958	Transcript	intron_variant	-	-	-	-	-	rs1266631570	MODIFIER	-	1	-	SNV	SLCO1B1	HGNC	HGNC:10959	protein_coding	YES	NM_006446.5	-	1	P1	CCDS8685.1	ENSP00000256958	Q9Y6L6.181	A0A024RAU7.41	UPI0000043BED	-	-	1	-	-	-	2023-03-14	-	-	ENST00000256958.3:c.227-98A>G	-	-	-	-	-	-	-
	12:21174482:A:G	chr12:21174482	G	ENSG00000134538	ENST00000256958	Transcript	intron_variant	-	-	-	-	-	rs1565673044	MODIFIER	-	1	-	SNV	SLCO1B1	HGNC	HGNC:10959	protein_coding	YES	NM_006446.5	-	1	P1	CCDS8685.1	ENSP00000256958	Q9Y6L6.181	A0A024RAU7.41	UPI0000043BED	-	-	1	-	-	-	2023-03-14	-	-	ENST00000256958.3:c.227-95A>G	-	-	-	-	-	-	-
	12:21174485:T:C	chr12:21174485	C	ENSG00000134538	ENST00000256958	Transcript	intron_variant	-	-	-	-	-	-	MODIFIER	-	1	-	SNV	SLCO1B1	HGNC	HGNC:10959	protein_coding	YES	NM_006446.5	-	1	P1	CCDS8685.1	ENSP00000256958	Q9Y6L6.181	A0A024RAU7.41	UPI0000043BED	-	-	1	-	-	-	2023-03-14	-	-	ENST00000256958.3:c.227-92T>C	-	-	-	-	-	-	-
	12:21174488:T:C	chr12:21174488	C	ENSG00000134538	ENST00000256958	Transcript	intron_variant	-	-	-	-	-	rs368238505	MODIFIER	-	1	-	SNV	SLCO1B1	HGNC	HGNC:10959	protein_coding	YES	NM_006446.5	-	1	P1	CCDS8685.1	ENSP00000256958	Q9Y6L6.181	A0A024RAU7.41	UPI0000043BED	-	-	1	-	-	-	2023-03-14	-	-	ENST00000256958.3:c.227-89T>C	-	-	0.0012	0.0008	0	0.004	0
	12:21174490:G:A	chr12:21174490	A	ENSG00000134538	ENST00000256958	Transcript	intron_variant	-	-	-	-	-	-	MODIFIER	-	1	-	SNV	SLCO1B1	HGNC	HGNC:10959	protein_coding	YES	NM_006446.5	-	1	P1	CCDS8685.1	ENSP00000256958	Q9Y6L6.181	A0A024RAU7.41	UPI0000043BED	-	-	1	-	-	-	2023-03-14	-	-	ENST00000256958.3:c.227-87G>A	-	-	-	-	-	-	-
	12:21174492:C:G	chr12:21174492	G	ENSG00000134538	ENST00000256958	Transcript	intron_variant	-	-	-	-	-	-	MODIFIER	-	1	-	SNV	SLCO1B1	HGNC	HGNC:10959	protein_coding	YES	NM_006446.5	-	1	P1	CCDS8685.1	ENSP00000256958	Q9Y6L6.181	A0A024RAU7.41	UPI0000043BED	-	-	1	-	-	-	2023-03-14	-	-	ENST00000256958.3:c.227-85C>G	-	-	-	-	-	-	-
	12:21174494:C:T	chr12:21174494	T	ENSG00000134538	ENST00000256958	Transcript	intron_variant	-	-	-	-	-	-	MODIFIER	-	1	-	SNV	SLCO1B1	HGNC	HGNC:10959	protein_coding	YES	NM_006446.5	-	1	P1	CCDS8685.1	ENSP00000256958	Q9Y6L6.181	A0A024RAU7.41	UPI0000043BED	-	-	1	-	-	-	2023-03-14	-	-	ENST00000256958.3:c.227-83C>T	-	-	-	-	-	-	-
	12:21174496:A:G	chr12:21174496	G	ENSG00000134538	ENST00000256958	Transcript	intron_variant	-	-	-	-	-	rs1050777906	MODIFIER	-	1	-	SNV	SLCO1B1	HGNC	HGNC:10959	protein_coding	YES	NM_006446.5	-	1	P1	CCDS8685.1	ENSP00000256958	Q9Y6L6.181	A0A024RAU7.41	UPI0000043BED	-	-	1	-	-	-	2023-03-14	-	-	ENST00000256958.3:c.227-81A>G	-	-	-	-	-	-	-
	12:21174497:T:C	chr12:21174497	C	ENSG00000134538	ENST00000256958	Transcript	intron_variant	-	-	-	-	-	-	MODIFIER	-	1	-	SNV	SLCO1B1	HGNC	HGNC:10959	protein_coding	YES	NM_006446.5	-	1	P1	CCDS8685.1	ENSP00000256958	Q9Y6L6.181	A0A024RAU7.41	UPI0000043BED	-	-	1	-	-	-	2023-03-14	-	-	ENST00000256958.3:c.227-80T>C	-	-	-	-	-	-	-
	12:21174500:G:A	chr12:21174500	A	ENSG00000134538	ENST00000256958	Transcript	intron_variant	-	-	-	-	-	-	MODIFIER	-	1	-	SNV	SLCO1B1	HGNC	HGNC:10959	protein_coding	YES	NM_006446.5	-	1	P1	CCDS8685.1	ENSP00000256958	Q9Y6L6.181	A0A024RAU7.41	UPI0000043BED	-	-	1	-	-	-	2023-03-14	-	-	ENST00000256958.3:c.227-77G>A	-	-	-	-	-	-	-
	12:21174505:C:G	chr12:21174505	G	ENSG00000134538	ENST00000256958	Transcript	intron_variant	-	-	-	-	-	rs371954730	MODIFIER	-	1	-	SNV	SLCO1B1	HGNC	HGNC:10959	protein_coding	YES	NM_006446.5	-	1	P1	CCDS8685.1	ENSP00000256958	Q9Y6L6.181	A0A024RAU7.41	UPI0000043BED	-	-	1	-	-	-	2023-03-14	-	-	ENST00000256958.3:c.227-72C>G	-	-	0.0072	0	0	0	0
	12:21174505:C:T	chr12:21174505	T	ENSG00000134538	ENST00000256958	Transcript	intron_variant	-	-	-	-	-	-	MODIFIER	-	1	-	SNV	SLCO1B1	HGNC	HGNC:10959	protein_coding	YES	NM_006446.5	-	1	P1	CCDS8685.1	ENSP00000256958	Q9Y6L6.181	A0A024RAU7.41	UPI0000043BED	-	-	1	-	-	-	2023-03-14	-	-	ENST00000256958.3:c.227-72C>T	-	-	-	-	-	-	-
	12:21174506:A:C	chr12:21174506	C	ENSG00000134538	ENST00000256958	Transcript	intron_variant	-	-	-	-	-	-	MODIFIER	-	1	-	SNV	SLCO1B1	HGNC	HGNC:10959	protein_coding	YES	NM_006446.5	-	1	P1	CCDS8685.1	ENSP00000256958	Q9Y6L6.181	A0A024RAU7.41	UPI0000043BED	-	-	1	-	-	-	2023-03-14	-	-	ENST00000256958.3:c.227-71A>C	-	-	-	-	-	-	-
	12:21174507:T:G	chr12:21174507	G	ENSG00000134538	ENST00000256958	Transcript	intron_variant	-	-	-	-	-	rs1355620025	MODIFIER	-	1	-	SNV	SLCO1B1	HGNC	HGNC:10959	protein_coding	YES	NM_006446.5	-	1	P1	CCDS8685.1	ENSP00000256958	Q9Y6L6.181	A0A024RAU7.41	UPI0000043BED	-	-	1	-	-	-	2023-03-14	-	-	ENST00000256958.3:c.227-70T>G	-	-	-	-	-	-	-
	12:21174510:T:C	chr12:21174510	C	ENSG00000134538	ENST00000256958	Transcript	intron_variant	-	-	-	-	-	-	MODIFIER	-	1	-	SNV	SLCO1B1	HGNC	HGNC:10959	protein_coding	YES	NM_006446.5	-	1	P1	CCDS8685.1	ENSP00000256958	Q9Y6L6.181	A0A024RAU7.41	UPI0000043BED	-	-	1	-	-	-	2023-03-14	-	-	ENST00000256958.3:c.227-67T>C	-	-	-	-	-	-	-
	12:21174511:G:T	chr12:21174511	T	ENSG00000134538	ENST00000256958	Transcript	intron_variant	-	-	-	-	-	-	MODIFIER	-	1	-	SNV	SLCO1B1	HGNC	HGNC:10959	protein_coding	YES	NM_006446.5	-	1	P1	CCDS8685.1	ENSP00000256958	Q9Y6L6.181	A0A024RAU7.41	UPI0000043BED	-	-	1	-	-	-	2023-03-14	-	-	ENST00000256958.3:c.227-66G>T	-	-	-	-	-	-	-
	12:21174512:G:A	chr12:21174512	A	ENSG00000134538	ENST00000256958	Transcript	intron_variant	-	-	-	-	-	rs1453222164	MODIFIER	-	1	-	SNV	SLCO1B1	HGNC	HGNC:10959	protein_coding	YES	NM_006446.5	-	1	P1	CCDS8685.1	ENSP00000256958	Q9Y6L6.181	A0A024RAU7.41	UPI0000043BED	-	-	1	-	-	-	2023-03-14	-	-	ENST00000256958.3:c.227-65G>A	-	-	-	-	-	-	-
	12:21174513:G:A	chr12:21174513	A	ENSG00000134538	ENST00000256958	Transcript	intron_variant	-	-	-	-	-	-	MODIFIER	-	1	-	SNV	SLCO1B1	HGNC	HGNC:10959	protein_coding	YES	NM_006446.5	-	1	P1	CCDS8685.1	ENSP00000256958	Q9Y6L6.181	A0A024RAU7.41	UPI0000043BED	-	-	1	-	-	-	2023-03-14	-	-	ENST00000256958.3:c.227-64G>A	-	-	-	-	-	-	-
	12:21174520:A:G	chr12:21174520	G	ENSG00000134538	ENST00000256958	Transcript	intron_variant	-	-	-	-	-	-	MODIFIER	-	1	-	SNV	SLCO1B1	HGNC	HGNC:10959	protein_coding	YES	NM_006446.5	-	1	P1	CCDS8685.1	ENSP00000256958	Q9Y6L6.181	A0A024RAU7.41	UPI0000043BED	-	-	1	-	-	-	2023-03-14	-	-	ENST00000256958.3:c.227-57A>G	-	-	-	-	-	-	-
	12:21174521:A:G	chr12:21174521	G	ENSG00000134538	ENST00000256958	Transcript	intron_variant	-	-	-	-	-	rs908431549	MODIFIER	-	1	-	SNV	SLCO1B1	HGNC	HGNC:10959	protein_coding	YES	NM_006446.5	-	1	P1	CCDS8685.1	ENSP00000256958	Q9Y6L6.181	A0A024RAU7.41	UPI0000043BED	-	-	1	-	-	-	2023-03-14	-	-	ENST00000256958.3:c.227-56A>G	-	-	-	-	-	-	-
	12:21174523:T:C	chr12:21174523	C	ENSG00000134538	ENST00000256958	Transcript	intron_variant	-	-	-	-	-	-	MODIFIER	-	1	-	SNV	SLCO1B1	HGNC	HGNC:10959	protein_coding	YES	NM_006446.5	-	1	P1	CCDS8685.1	ENSP00000256958	Q9Y6L6.181	A0A024RAU7.41	UPI0000043BED	-	-	1	-	-	-	2023-03-14	-	-	ENST00000256958.3:c.227-54T>C	-	-	-	-	-	-	-
	12:21174523:T:G	chr12:21174523	G	ENSG00000134538	ENST00000256958	Transcript	intron_variant	-	-	-	-	-	-	MODIFIER	-	1	-	SNV	SLCO1B1	HGNC	HGNC:10959	protein_coding	YES	NM_006446.5	-	1	P1	CCDS8685.1	ENSP00000256958	Q9Y6L6.181	A0A024RAU7.41	UPI0000043BED	-	-	1	-	-	-	2023-03-14	-	-	ENST00000256958.3:c.227-54T>G	-	-	-	-	-	-	-
	12:21174528:A:G	chr12:21174528	G	ENSG00000134538	ENST00000256958	Transcript	intron_variant	-	-	-	-	-	-	MODIFIER	-	1	-	SNV	SLCO1B1	HGNC	HGNC:10959	protein_coding	YES	NM_006446.5	-	1	P1	CCDS8685.1	ENSP00000256958	Q9Y6L6.181	A0A024RAU7.41	UPI0000043BED	-	-	1	-	-	-	2023-03-14	-	-	ENST00000256958.3:c.227-49A>G	-	-	-	-	-	-	-
	12:21174529:C:T	chr12:21174529	T	ENSG00000134538	ENST00000256958	Transcript	intron_variant	-	-	-	-	-	rs760778288,COSV57013768	MODIFIER	-	1	-	SNV	SLCO1B1	HGNC	HGNC:10959	protein_coding	YES	NM_006446.5	-	1	P1	CCDS8685.1	ENSP00000256958	Q9Y6L6.181	A0A024RAU7.41	UPI0000043BED	-	-	1	-	-	-	2023-03-14	-	-	ENST00000256958.3:c.227-48C>T	-	-	-	-	-	-	-
	12:21174530:G:A	chr12:21174530	A	ENSG00000134538	ENST00000256958	Transcript	intron_variant	-	-	-	-	-	rs1271842611	MODIFIER	-	1	-	SNV	SLCO1B1	HGNC	HGNC:10959	protein_coding	YES	NM_006446.5	-	1	P1	CCDS8685.1	ENSP00000256958	Q9Y6L6.181	A0A024RAU7.41	UPI0000043BED	-	-	1	-	-	-	2023-03-14	-	-	ENST00000256958.3:c.227-47G>A	-	-	-	-	-	-	-
	12:21174538:G:C	chr12:21174538	C	ENSG00000134538	ENST00000256958	Transcript	intron_variant	-	-	-	-	-	-	MODIFIER	-	1	-	SNV	SLCO1B1	HGNC	HGNC:10959	protein_coding	YES	NM_006446.5	-	1	P1	CCDS8685.1	ENSP00000256958	Q9Y6L6.181	A0A024RAU7.41	UPI0000043BED	-	-	1	-	-	-	2023-03-14	-	-	ENST00000256958.3:c.227-39G>C	-	-	-	-	-	-	-
	12:21174542:T:A	chr12:21174542	A	ENSG00000134538	ENST00000256958	Transcript	intron_variant	-	-	-	-	-	-	MODIFIER	-	1	-	SNV	SLCO1B1	HGNC	HGNC:10959	protein_coding	YES	NM_006446.5	-	1	P1	CCDS8685.1	ENSP00000256958	Q9Y6L6.181	A0A024RAU7.41	UPI0000043BED	-	-	1	-	-	-	2023-03-14	-	-	ENST00000256958.3:c.227-35T>A	-	-	-	-	-	-	-
	12:21174545:G:T	chr12:21174545	T	ENSG00000134538	ENST00000256958	Transcript	intron_variant	-	-	-	-	-	-	MODIFIER	-	1	-	SNV	SLCO1B1	HGNC	HGNC:10959	protein_coding	YES	NM_006446.5	-	1	P1	CCDS8685.1	ENSP00000256958	Q9Y6L6.181	A0A024RAU7.41	UPI0000043BED	-	-	1	-	-	-	2023-03-14	-	-	ENST00000256958.3:c.227-32G>T	-	-	-	-	-	-	-
	12:21174546:C:T	chr12:21174546	T	ENSG00000134538	ENST00000256958	Transcript	intron_variant	-	-	-	-	-	rs1046339911	MODIFIER	-	1	-	SNV	SLCO1B1	HGNC	HGNC:10959	protein_coding	YES	NM_006446.5	-	1	P1	CCDS8685.1	ENSP00000256958	Q9Y6L6.181	A0A024RAU7.41	UPI0000043BED	-	-	1	-	-	-	2023-03-14	-	-	ENST00000256958.3:c.227-31C>T	-	-	-	-	-	-	-
	12:21174548:G:A	chr12:21174548	A	ENSG00000134538	ENST00000256958	Transcript	intron_variant	-	-	-	-	-	rs746990539	MODIFIER	-	1	-	SNV	SLCO1B1	HGNC	HGNC:10959	protein_coding	YES	NM_006446.5	-	1	P1	CCDS8685.1	ENSP00000256958	Q9Y6L6.181	A0A024RAU7.41	UPI0000043BED	-	-	1	-	-	-	2023-03-14	-	-	ENST00000256958.3:c.227-29G>A	-	-	-	-	-	-	-
	12:21174548:G:T	chr12:21174548	T	ENSG00000134538	ENST00000256958	Transcript	intron_variant	-	-	-	-	-	rs746990539	MODIFIER	-	1	-	SNV	SLCO1B1	HGNC	HGNC:10959	protein_coding	YES	NM_006446.5	-	1	P1	CCDS8685.1	ENSP00000256958	Q9Y6L6.181	A0A024RAU7.41	UPI0000043BED	-	-	1	-	-	-	2023-03-14	-	-	ENST00000256958.3:c.227-29G>T	-	-	-	-	-	-	-
	12:21174549:T:G	chr12:21174549	G	ENSG00000134538	ENST00000256958	Transcript	intron_variant	-	-	-	-	-	-	MODIFIER	-	1	-	SNV	SLCO1B1	HGNC	HGNC:10959	protein_coding	YES	NM_006446.5	-	1	P1	CCDS8685.1	ENSP00000256958	Q9Y6L6.181	A0A024RAU7.41	UPI0000043BED	-	-	1	-	-	-	2023-03-14	-	-	ENST00000256958.3:c.227-28T>G	-	-	-	-	-	-	-
	12:21174553:A:T	chr12:21174553	T	ENSG00000134538	ENST00000256958	Transcript	intron_variant	-	-	-	-	-	-	MODIFIER	-	1	-	SNV	SLCO1B1	HGNC	HGNC:10959	protein_coding	YES	NM_006446.5	-	1	P1	CCDS8685.1	ENSP00000256958	Q9Y6L6.181	A0A024RAU7.41	UPI0000043BED	-	-	1	-	-	-	2023-03-14	-	-	ENST00000256958.3:c.227-24A>T	-	-	-	-	-	-	-
	12:21174555:C:G	chr12:21174555	G	ENSG00000134538	ENST00000256958	Transcript	intron_variant	-	-	-	-	-	-	MODIFIER	-	1	-	SNV	SLCO1B1	HGNC	HGNC:10959	protein_coding	YES	NM_006446.5	-	1	P1	CCDS8685.1	ENSP00000256958	Q9Y6L6.181	A0A024RAU7.41	UPI0000043BED	-	-	1	-	-	-	2023-03-14	-	-	ENST00000256958.3:c.227-22C>G	-	-	-	-	-	-	-
	12:21174567:C:A	chr12:21174567	A	ENSG00000134538	ENST00000256958	Transcript	intron_variant	-	-	-	-	-	rs765630376	MODIFIER	-	1	-	SNV	SLCO1B1	HGNC	HGNC:10959	protein_coding	YES	NM_006446.5	-	1	P1	CCDS8685.1	ENSP00000256958	Q9Y6L6.181	A0A024RAU7.41	UPI0000043BED	-	-	1	-	-	-	2023-03-14	-	-	ENST00000256958.3:c.227-10C>A	-	-	-	-	-	-	-
	12:21174572:T:G	chr12:21174572	G	ENSG00000134538	ENST00000256958	Transcript	splice_region_variant,intron_variant	-	-	-	-	-	-	LOW	-	1	-	SNV	SLCO1B1	HGNC	HGNC:10959	protein_coding	YES	NM_006446.5	-	1	P1	CCDS8685.1	ENSP00000256958	Q9Y6L6.181	A0A024RAU7.41	UPI0000043BED	-	-	1	-	-	-	2023-03-14	-	-	ENST00000256958.3:c.227-5T>G	-	-	-	-	-	-	-
	12:21174577:G:C	chr12:21174577	C	ENSG00000134538	ENST00000256958	Transcript	missense_variant,splice_region_variant	331	227	76	G/A	gGa/gCa	COSV57017720	MODERATE	-	1	-	SNV	SLCO1B1	HGNC	HGNC:10959	protein_coding	YES	NM_006446.5	-	1	P1	CCDS8685.1	ENSP00000256958	Q9Y6L6.181	A0A024RAU7.41	UPI0000043BED	-	-	1	deleterious(0)	probably_damaging(1)	2023-04-15	-	Transmembrane_helices:TMhelix,PROSITE_profiles:PS50850,PANTHER:PTHR11388,PANTHER:PTHR11388:SF82,Pfam:PF03137,TIGRFAM:TIGR00805,Superfamily:SSF103473	-	ENST00000256958.3:c.227G>C	ENSP00000256958.2:p.Gly76Ala	-	-	-	-	-	-
	12:21174585:C:T	chr12:21174585	T	ENSG00000134538	ENST00000256958	Transcript	missense_variant	339	235	79	L/F	Ctt/Ttt	rs370130036	MODERATE	-	1	-	SNV	SLCO1B1	HGNC	HGNC:10959	protein_coding	YES	NM_006446.5	-	1	P1	CCDS8685.1	ENSP00000256958	Q9Y6L6.181	A0A024RAU7.41	UPI0000043BED	-	-	1	tolerated(0.32)	benign(0.4)	2023-04-15	-	Transmembrane_helices:TMhelix,PROSITE_profiles:PS50850,PANTHER:PTHR11388,PANTHER:PTHR11388:SF82,Pfam:PF03137,TIGRFAM:TIGR00805,Superfamily:SSF103473	-	ENST00000256958.3:c.235C>T	ENSP00000256958.2:p.Leu79Phe	-	0.0002	0	0.0014	0	0
	12:21174586:T:C	chr12:21174586	C	ENSG00000134538	ENST00000256958	Transcript	missense_variant	340	236	79	L/P	cTt/cCt	-	MODERATE	-	1	-	SNV	SLCO1B1	HGNC	HGNC:10959	protein_coding	YES	NM_006446.5	-	1	P1	CCDS8685.1	ENSP00000256958	Q9Y6L6.181	A0A024RAU7.41	UPI0000043BED	-	-	1	deleterious(0)	probably_damaging(0.994)	2023-04-15	-	Transmembrane_helices:TMhelix,PROSITE_profiles:PS50850,PANTHER:PTHR11388,PANTHER:PTHR11388:SF82,Pfam:PF03137,TIGRFAM:TIGR00805,Superfamily:SSF103473	-	ENST00000256958.3:c.236T>C	ENSP00000256958.2:p.Leu79Pro	-	-	-	-	-	-
	12:21174588:G:T	chr12:21174588	T	ENSG00000134538	ENST00000256958	Transcript	missense_variant	342	238	80	V/L	Gtg/Ttg	rs781021072	MODERATE	-	1	-	SNV	SLCO1B1	HGNC	HGNC:10959	protein_coding	YES	NM_006446.5	-	1	P1	CCDS8685.1	ENSP00000256958	Q9Y6L6.181	A0A024RAU7.41	UPI0000043BED	-	-	1	tolerated(0.09)	possibly_damaging(0.524)	2023-04-15	-	Transmembrane_helices:TMhelix,PROSITE_profiles:PS50850,PANTHER:PTHR11388,PANTHER:PTHR11388:SF82,Pfam:PF03137,TIGRFAM:TIGR00805,Superfamily:SSF103473	-	ENST00000256958.3:c.238G>T	ENSP00000256958.2:p.Val80Leu	-	-	-	-	-	-
	12:21174592:T:C	chr12:21174592	C	ENSG00000134538	ENST00000256958	Transcript	missense_variant	346	242	81	I/T	aTt/aCt	rs1353535924	MODERATE	-	1	-	SNV	SLCO1B1	HGNC	HGNC:10959	protein_coding	YES	NM_006446.5	-	1	P1	CCDS8685.1	ENSP00000256958	Q9Y6L6.181	A0A024RAU7.41	UPI0000043BED	-	-	1	deleterious(0)	probably_damaging(0.996)	2023-04-15	-	Transmembrane_helices:TMhelix,PROSITE_profiles:PS50850,PANTHER:PTHR11388,PANTHER:PTHR11388:SF82,Pfam:PF03137,TIGRFAM:TIGR00805,Superfamily:SSF103473	-	ENST00000256958.3:c.242T>C	ENSP00000256958.2:p.Ile81Thr	-	-	-	-	-	-
	12:21174596:A:G	chr12:21174596	G	ENSG00000134538	ENST00000256958	Transcript	synonymous_variant	350	246	82	V	gtA/gtG	-	LOW	-	1	-	SNV	SLCO1B1	HGNC	HGNC:10959	protein_coding	YES	NM_006446.5	-	1	P1	CCDS8685.1	ENSP00000256958	Q9Y6L6.181	A0A024RAU7.41	UPI0000043BED	-	-	1	-	-	2023-04-15	-	Transmembrane_helices:TMhelix,PROSITE_profiles:PS50850,PANTHER:PTHR11388,PANTHER:PTHR11388:SF82,Pfam:PF03137,TIGRFAM:TIGR00805,Superfamily:SSF103473	-	ENST00000256958.3:c.246A>G	ENSP00000256958.2:p.Val82%3D	-	-	-	-	-	-
	12:21174599:T:C	chr12:21174599	C	ENSG00000134538	ENST00000256958	Transcript	synonymous_variant	353	249	83	F	ttT/ttC	-	LOW	-	1	-	SNV	SLCO1B1	HGNC	HGNC:10959	protein_coding	YES	NM_006446.5	-	1	P1	CCDS8685.1	ENSP00000256958	Q9Y6L6.181	A0A024RAU7.41	UPI0000043BED	-	-	1	-	-	2023-04-15	-	Transmembrane_helices:TMhelix,PROSITE_profiles:PS50850,PANTHER:PTHR11388,PANTHER:PTHR11388:SF82,Pfam:PF03137,TIGRFAM:TIGR00805,Superfamily:SSF103473	-	ENST00000256958.3:c.249T>C	ENSP00000256958.2:p.Phe83%3D	-	-	-	-	-	-
	12:21174600:G:T	chr12:21174600	T	ENSG00000134538	ENST00000256958	Transcript	missense_variant	354	250	84	V/L	Gtg/Ttg	rs750031541	MODERATE	-	1	-	SNV	SLCO1B1	HGNC	HGNC:10959	protein_coding	YES	NM_006446.5	-	1	P1	CCDS8685.1	ENSP00000256958	Q9Y6L6.181	A0A024RAU7.41	UPI0000043BED	-	-	1	deleterious(0)	probably_damaging(0.996)	2023-04-15	-	Transmembrane_helices:TMhelix,PROSITE_profiles:PS50850,PANTHER:PTHR11388,PANTHER:PTHR11388:SF82,Pfam:PF03137,TIGRFAM:TIGR00805,Superfamily:SSF103473	-	ENST00000256958.3:c.250G>T	ENSP00000256958.2:p.Val84Leu	-	-	-	-	-	-
	12:21174605:T:C	chr12:21174605	C	ENSG00000134538	ENST00000256958	Transcript	synonymous_variant	359	255	85	S	agT/agC	rs71581978	LOW	-	1	-	SNV	SLCO1B1	HGNC	HGNC:10959	protein_coding	YES	NM_006446.5	-	1	P1	CCDS8685.1	ENSP00000256958	Q9Y6L6.181	A0A024RAU7.41	UPI0000043BED	-	-	1	-	-	2023-04-15	-	Transmembrane_helices:TMhelix,PROSITE_profiles:PS50850,PANTHER:PTHR11388,PANTHER:PTHR11388:SF82,Pfam:PF03137,TIGRFAM:TIGR00805,Superfamily:SSF103473	-	ENST00000256958.3:c.255T>C	ENSP00000256958.2:p.Ser85%3D	-	-	-	-	-	-
	12:21174614:A:T	chr12:21174614	T	ENSG00000134538	ENST00000256958	Transcript	synonymous_variant	368	264	88	G	ggA/ggT	rs779769619	LOW	-	1	-	SNV	SLCO1B1	HGNC	HGNC:10959	protein_coding	YES	NM_006446.5	-	1	P1	CCDS8685.1	ENSP00000256958	Q9Y6L6.181	A0A024RAU7.41	UPI0000043BED	-	-	1	-	-	2023-04-15	-	Transmembrane_helices:TMhelix,PROSITE_profiles:PS50850,PANTHER:PTHR11388,PANTHER:PTHR11388:SF82,Pfam:PF03137,TIGRFAM:TIGR00805,Superfamily:SSF103473	-	ENST00000256958.3:c.264A>T	ENSP00000256958.2:p.Gly88%3D	-	-	-	-	-	-
	12:21174619:A:G	chr12:21174619	G	ENSG00000134538	ENST00000256958	Transcript	missense_variant	373	269	90	K/R	aAa/aGa	COSV57009466	MODERATE	-	1	-	SNV	SLCO1B1	HGNC	HGNC:10959	protein_coding	YES	NM_006446.5	-	1	P1	CCDS8685.1	ENSP00000256958	Q9Y6L6.181	A0A024RAU7.41	UPI0000043BED	-	-	1	deleterious(0.05)	probably_damaging(0.951)	2023-04-15	-	PROSITE_profiles:PS50850,PANTHER:PTHR11388,PANTHER:PTHR11388:SF82,Pfam:PF03137,TIGRFAM:TIGR00805,Superfamily:SSF103473	-	ENST00000256958.3:c.269A>G	ENSP00000256958.2:p.Lys90Arg	-	-	-	-	-	-
	12:21174621:C:G	chr12:21174621	G	ENSG00000134538	ENST00000256958	Transcript	missense_variant	375	271	91	L/V	Cta/Gta	-	MODERATE	-	1	-	SNV	SLCO1B1	HGNC	HGNC:10959	protein_coding	YES	NM_006446.5	-	1	P1	CCDS8685.1	ENSP00000256958	Q9Y6L6.181	A0A024RAU7.41	UPI0000043BED	-	-	1	deleterious(0.02)	possibly_damaging(0.836)	2023-04-15	-	PROSITE_profiles:PS50850,PANTHER:PTHR11388,PANTHER:PTHR11388:SF82,Pfam:PF03137,TIGRFAM:TIGR00805,Superfamily:SSF103473	-	ENST00000256958.3:c.271C>G	ENSP00000256958.2:p.Leu91Val	-	-	-	-	-	-
	12:21174623:A:G	chr12:21174623	G	ENSG00000134538	ENST00000256958	Transcript	synonymous_variant	377	273	91	L	ctA/ctG	rs748803104	LOW	-	1	-	SNV	SLCO1B1	HGNC	HGNC:10959	protein_coding	YES	NM_006446.5	-	1	P1	CCDS8685.1	ENSP00000256958	Q9Y6L6.181	A0A024RAU7.41	UPI0000043BED	-	-	1	-	-	2023-04-15	-	PROSITE_profiles:PS50850,PANTHER:PTHR11388,PANTHER:PTHR11388:SF82,Pfam:PF03137,TIGRFAM:TIGR00805,Superfamily:SSF103473	-	ENST00000256958.3:c.273A>G	ENSP00000256958.2:p.Leu91%3D	-	-	-	-	-	-
	12:21174626:T:C	chr12:21174626	C	ENSG00000134538	ENST00000256958	Transcript	synonymous_variant	380	276	92	H	caT/caC	-	LOW	-	1	-	SNV	SLCO1B1	HGNC	HGNC:10959	protein_coding	YES	NM_006446.5	-	1	P1	CCDS8685.1	ENSP00000256958	Q9Y6L6.181	A0A024RAU7.41	UPI0000043BED	-	-	1	-	-	2023-04-15	-	PROSITE_profiles:PS50850,PANTHER:PTHR11388,PANTHER:PTHR11388:SF82,Pfam:PF03137,TIGRFAM:TIGR00805,Superfamily:SSF103473	-	ENST00000256958.3:c.276T>C	ENSP00000256958.2:p.His92%3D	-	-	-	-	-	-
	12:21174629:A:G	chr12:21174629	G	ENSG00000134538	ENST00000256958	Transcript	synonymous_variant	383	279	93	R	agA/agG	rs768683458	LOW	-	1	-	SNV	SLCO1B1	HGNC	HGNC:10959	protein_coding	YES	NM_006446.5	-	1	P1	CCDS8685.1	ENSP00000256958	Q9Y6L6.181	A0A024RAU7.41	UPI0000043BED	-	-	1	-	-	2023-04-15	-	PROSITE_profiles:PS50850,PANTHER:PTHR11388,PANTHER:PTHR11388:SF82,Pfam:PF03137,TIGRFAM:TIGR00805,Superfamily:SSF103473	-	ENST00000256958.3:c.279A>G	ENSP00000256958.2:p.Arg93%3D	-	-	-	-	-	-
	12:21174635:G:A	chr12:21174635	A	ENSG00000134538	ENST00000256958	Transcript	synonymous_variant	389	285	95	K	aaG/aaA	-	LOW	-	1	-	SNV	SLCO1B1	HGNC	HGNC:10959	protein_coding	YES	NM_006446.5	-	1	P1	CCDS8685.1	ENSP00000256958	Q9Y6L6.181	A0A024RAU7.41	UPI0000043BED	-	-	1	-	-	2023-04-15	-	PROSITE_profiles:PS50850,PANTHER:PTHR11388,PANTHER:PTHR11388:SF82,Pfam:PF03137,TIGRFAM:TIGR00805,Superfamily:SSF103473	-	ENST00000256958.3:c.285G>A	ENSP00000256958.2:p.Lys95%3D	-	-	-	-	-	-
	12:21174635:G:T	chr12:21174635	T	ENSG00000134538	ENST00000256958	Transcript	missense_variant	389	285	95	K/N	aaG/aaT	-	MODERATE	-	1	-	SNV	SLCO1B1	HGNC	HGNC:10959	protein_coding	YES	NM_006446.5	-	1	P1	CCDS8685.1	ENSP00000256958	Q9Y6L6.181	A0A024RAU7.41	UPI0000043BED	-	-	1	deleterious(0)	probably_damaging(0.992)	2023-04-15	-	PROSITE_profiles:PS50850,PANTHER:PTHR11388,PANTHER:PTHR11388:SF82,Pfam:PF03137,TIGRFAM:TIGR00805,Superfamily:SSF103473	-	ENST00000256958.3:c.285G>T	ENSP00000256958.2:p.Lys95Asn	-	-	-	-	-	-
	12:21174636:T:A	chr12:21174636	A	ENSG00000134538	ENST00000256958	Transcript	missense_variant	390	286	96	L/I	Tta/Ata	rs1342141030	MODERATE	-	1	-	SNV	SLCO1B1	HGNC	HGNC:10959	protein_coding	YES	NM_006446.5	-	1	P1	CCDS8685.1	ENSP00000256958	Q9Y6L6.181	A0A024RAU7.41	UPI0000043BED	-	-	1	tolerated(0.83)	benign(0.035)	2023-04-15	-	Transmembrane_helices:TMhelix,PROSITE_profiles:PS50850,PANTHER:PTHR11388,PANTHER:PTHR11388:SF82,Pfam:PF03137,TIGRFAM:TIGR00805,Superfamily:SSF103473	-	ENST00000256958.3:c.286T>A	ENSP00000256958.2:p.Leu96Ile	-	-	-	-	-	-
	12:21174637:T:C	chr12:21174637	C	ENSG00000134538	ENST00000256958	Transcript	missense_variant	391	287	96	L/S	tTa/tCa	-	MODERATE	-	1	-	SNV	SLCO1B1	HGNC	HGNC:10959	protein_coding	YES	NM_006446.5	-	1	P1	CCDS8685.1	ENSP00000256958	Q9Y6L6.181	A0A024RAU7.41	UPI0000043BED	-	-	1	deleterious(0)	possibly_damaging(0.836)	2023-04-15	-	Transmembrane_helices:TMhelix,PROSITE_profiles:PS50850,PANTHER:PTHR11388,PANTHER:PTHR11388:SF82,Pfam:PF03137,TIGRFAM:TIGR00805,Superfamily:SSF103473	-	ENST00000256958.3:c.287T>C	ENSP00000256958.2:p.Leu96Ser	-	-	-	-	-	-
	12:21174640:T:C	chr12:21174640	C	ENSG00000134538	ENST00000256958	Transcript	missense_variant	394	290	97	I/T	aTt/aCt	rs865965255,COSV57012489	MODERATE	-	1	-	SNV	SLCO1B1	HGNC	HGNC:10959	protein_coding	YES	NM_006446.5	-	1	P1	CCDS8685.1	ENSP00000256958	Q9Y6L6.181	A0A024RAU7.41	UPI0000043BED	-	-	1	deleterious(0)	probably_damaging(0.996)	2023-04-15	-	Low_complexity_(Seg):seg,Transmembrane_helices:TMhelix,PROSITE_profiles:PS50850,PANTHER:PTHR11388,PANTHER:PTHR11388:SF82,Pfam:PF03137,TIGRFAM:TIGR00805,Superfamily:SSF103473	-	ENST00000256958.3:c.290T>C	ENSP00000256958.2:p.Ile97Thr	-	-	-	-	-	-
	12:21174645:A:T	chr12:21174645	T	ENSG00000134538	ENST00000256958	Transcript	missense_variant	399	295	99	I/F	Atc/Ttc	-	MODERATE	-	1	-	SNV	SLCO1B1	HGNC	HGNC:10959	protein_coding	YES	NM_006446.5	-	1	P1	CCDS8685.1	ENSP00000256958	Q9Y6L6.181	A0A024RAU7.41	UPI0000043BED	-	-	1	deleterious(0.01)	probably_damaging(0.924)	2023-04-15	-	Low_complexity_(Seg):seg,Transmembrane_helices:TMhelix,PROSITE_profiles:PS50850,PANTHER:PTHR11388,PANTHER:PTHR11388:SF82,Pfam:PF03137,TIGRFAM:TIGR00805,Superfamily:SSF103473	-	ENST00000256958.3:c.295A>T	ENSP00000256958.2:p.Ile99Phe	-	-	-	-	-	-
	12:21174647:C:T	chr12:21174647	T	ENSG00000134538	ENST00000256958	Transcript	synonymous_variant	401	297	99	I	atC/atT	rs748000403,COSV57013761	LOW	-	1	-	SNV	SLCO1B1	HGNC	HGNC:10959	protein_coding	YES	NM_006446.5	-	1	P1	CCDS8685.1	ENSP00000256958	Q9Y6L6.181	A0A024RAU7.41	UPI0000043BED	-	-	1	-	-	2023-04-15	-	Low_complexity_(Seg):seg,Transmembrane_helices:TMhelix,PROSITE_profiles:PS50850,PANTHER:PTHR11388,PANTHER:PTHR11388:SF82,Pfam:PF03137,TIGRFAM:TIGR00805,Superfamily:SSF103473	-	ENST00000256958.3:c.297C>T	ENSP00000256958.2:p.Ile99%3D	-	-	-	-	-	-
	12:21174648:G:A	chr12:21174648	A	ENSG00000134538	ENST00000256958	Transcript	missense_variant	402	298	100	G/S	Ggt/Agt	rs144508550,COSV104376771	MODERATE	-	1	-	SNV	SLCO1B1	HGNC	HGNC:10959	protein_coding	YES	NM_006446.5	-	1	P1	CCDS8685.1	ENSP00000256958	Q9Y6L6.181	A0A024RAU7.41	UPI0000043BED	-	-	1	deleterious(0)	probably_damaging(1)	2023-04-15	-	Low_complexity_(Seg):seg,Transmembrane_helices:TMhelix,PROSITE_profiles:PS50850,PANTHER:PTHR11388,PANTHER:PTHR11388:SF82,Pfam:PF03137,TIGRFAM:TIGR00805,Superfamily:SSF103473	-	ENST00000256958.3:c.298G>A	ENSP00000256958.2:p.Gly100Ser	-	-	-	-	-	-
	12:21174648:G:T	chr12:21174648	T	ENSG00000134538	ENST00000256958	Transcript	missense_variant	402	298	100	G/C	Ggt/Tgt	rs144508550,COSV104376771	MODERATE	-	1	-	SNV	SLCO1B1	HGNC	HGNC:10959	protein_coding	YES	NM_006446.5	-	1	P1	CCDS8685.1	ENSP00000256958	Q9Y6L6.181	A0A024RAU7.41	UPI0000043BED	-	-	1	deleterious(0)	probably_damaging(1)	2023-04-15	-	Low_complexity_(Seg):seg,Transmembrane_helices:TMhelix,PROSITE_profiles:PS50850,PANTHER:PTHR11388,PANTHER:PTHR11388:SF82,Pfam:PF03137,TIGRFAM:TIGR00805,Superfamily:SSF103473	-	ENST00000256958.3:c.298G>T	ENSP00000256958.2:p.Gly100Cys	-	-	-	-	-	-
	12:21174657:A:G	chr12:21174657	G	ENSG00000134538	ENST00000256958	Transcript	missense_variant	411	307	103	I/V	Att/Gtt	-	MODERATE	-	1	-	SNV	SLCO1B1	HGNC	HGNC:10959	protein_coding	YES	NM_006446.5	-	1	P1	CCDS8685.1	ENSP00000256958	Q9Y6L6.181	A0A024RAU7.41	UPI0000043BED	-	-	1	tolerated(0.25)	benign(0.07)	2023-04-15	-	Low_complexity_(Seg):seg,Transmembrane_helices:TMhelix,PROSITE_profiles:PS50850,PANTHER:PTHR11388,PANTHER:PTHR11388:SF82,Pfam:PF03137,TIGRFAM:TIGR00805,Superfamily:SSF103473	-	ENST00000256958.3:c.307A>G	ENSP00000256958.2:p.Ile103Val	-	-	-	-	-	-
	12:21174658:T:C	chr12:21174658	C	ENSG00000134538	ENST00000256958	Transcript	missense_variant	412	308	103	I/T	aTt/aCt	rs1020651949	MODERATE	-	1	-	SNV	SLCO1B1	HGNC	HGNC:10959	protein_coding	YES	NM_006446.5	-	1	P1	CCDS8685.1	ENSP00000256958	Q9Y6L6.181	A0A024RAU7.41	UPI0000043BED	-	-	1	tolerated(0.3)	benign(0.259)	2023-04-15	-	Low_complexity_(Seg):seg,Transmembrane_helices:TMhelix,PROSITE_profiles:PS50850,PANTHER:PTHR11388,PANTHER:PTHR11388:SF82,Pfam:PF03137,TIGRFAM:TIGR00805,Superfamily:SSF103473	-	ENST00000256958.3:c.308T>C	ENSP00000256958.2:p.Ile103Thr	-	-	-	-	-	-
	12:21174664:G:T	chr12:21174664	T	ENSG00000134538	ENST00000256958	Transcript	missense_variant	418	314	105	G/V	gGa/gTa	rs773434165	MODERATE	-	1	-	SNV	SLCO1B1	HGNC	HGNC:10959	protein_coding	YES	NM_006446.5	-	1	P1	CCDS8685.1	ENSP00000256958	Q9Y6L6.181	A0A024RAU7.41	UPI0000043BED	-	-	1	deleterious(0)	probably_damaging(0.993)	2023-04-15	-	Low_complexity_(Seg):seg,Transmembrane_helices:TMhelix,PROSITE_profiles:PS50850,PANTHER:PTHR11388,PANTHER:PTHR11388:SF82,Pfam:PF03137,TIGRFAM:TIGR00805,Superfamily:SSF103473	-	ENST00000256958.3:c.314G>T	ENSP00000256958.2:p.Gly105Val	-	-	-	-	-	-
	12:21174666:A:G	chr12:21174666	G	ENSG00000134538	ENST00000256958	Transcript	missense_variant	420	316	106	I/V	Att/Gtt	-	MODERATE	-	1	-	SNV	SLCO1B1	HGNC	HGNC:10959	protein_coding	YES	NM_006446.5	-	1	P1	CCDS8685.1	ENSP00000256958	Q9Y6L6.181	A0A024RAU7.41	UPI0000043BED	-	-	1	tolerated(0.87)	benign(0.01)	2023-04-15	-	Low_complexity_(Seg):seg,Transmembrane_helices:TMhelix,PROSITE_profiles:PS50850,PANTHER:PTHR11388,PANTHER:PTHR11388:SF82,Pfam:PF03137,TIGRFAM:TIGR00805,Superfamily:SSF103473	-	ENST00000256958.3:c.316A>G	ENSP00000256958.2:p.Ile106Val	-	-	-	-	-	-
	12:21174667:T:A	chr12:21174667	A	ENSG00000134538	ENST00000256958	Transcript	missense_variant	421	317	106	I/N	aTt/aAt	COSV57011820	MODERATE	-	1	-	SNV	SLCO1B1	HGNC	HGNC:10959	protein_coding	YES	NM_006446.5	-	1	P1	CCDS8685.1	ENSP00000256958	Q9Y6L6.181	A0A024RAU7.41	UPI0000043BED	-	-	1	deleterious(0.02)	possibly_damaging(0.694)	2023-04-15	-	Low_complexity_(Seg):seg,Transmembrane_helices:TMhelix,PROSITE_profiles:PS50850,PANTHER:PTHR11388,PANTHER:PTHR11388:SF82,Pfam:PF03137,TIGRFAM:TIGR00805,Superfamily:SSF103473	-	ENST00000256958.3:c.317T>A	ENSP00000256958.2:p.Ile106Asn	-	-	-	-	-	-
	12:21174667:T:C	chr12:21174667	C	ENSG00000134538	ENST00000256958	Transcript	missense_variant	421	317	106	I/T	aTt/aCt	rs200227560,COSV57011820	MODERATE	-	1	-	SNV	SLCO1B1	HGNC	HGNC:10959	protein_coding	YES	NM_006446.5	-	1	P1	CCDS8685.1	ENSP00000256958	Q9Y6L6.181	A0A024RAU7.41	UPI0000043BED	-	-	1	tolerated(0.7)	benign(0.023)	2023-04-15	-	Low_complexity_(Seg):seg,Transmembrane_helices:TMhelix,PROSITE_profiles:PS50850,PANTHER:PTHR11388,PANTHER:PTHR11388:SF82,Pfam:PF03137,TIGRFAM:TIGR00805,Superfamily:SSF103473	-	ENST00000256958.3:c.317T>C	ENSP00000256958.2:p.Ile106Thr	-	0.0006	0	0.0014	0	0.001
	12:21174668:T:G	chr12:21174668	G	ENSG00000134538	ENST00000256958	Transcript	missense_variant	422	318	106	I/M	atT/atG	rs1476378208	MODERATE	-	1	-	SNV	SLCO1B1	HGNC	HGNC:10959	protein_coding	YES	NM_006446.5	-	1	P1	CCDS8685.1	ENSP00000256958	Q9Y6L6.181	A0A024RAU7.41	UPI0000043BED	-	-	1	tolerated(0.11)	benign(0.232)	2023-04-15	-	Low_complexity_(Seg):seg,Transmembrane_helices:TMhelix,PROSITE_profiles:PS50850,PANTHER:PTHR11388,PANTHER:PTHR11388:SF82,Pfam:PF03137,TIGRFAM:TIGR00805,Superfamily:SSF103473	-	ENST00000256958.3:c.318T>G	ENSP00000256958.2:p.Ile106Met	-	-	-	-	-	-
	12:21174669:G:A	chr12:21174669	A	ENSG00000134538	ENST00000256958	Transcript	missense_variant	423	319	107	G/R	Gga/Aga	-	MODERATE	-	1	-	SNV	SLCO1B1	HGNC	HGNC:10959	protein_coding	YES	NM_006446.5	-	1	P1	CCDS8685.1	ENSP00000256958	Q9Y6L6.181	A0A024RAU7.41	UPI0000043BED	-	-	1	deleterious(0)	probably_damaging(1)	2023-04-15	-	Low_complexity_(Seg):seg,Transmembrane_helices:TMhelix,PROSITE_profiles:PS50850,PANTHER:PTHR11388,PANTHER:PTHR11388:SF82,Pfam:PF03137,TIGRFAM:TIGR00805,Superfamily:SSF103473	-	ENST00000256958.3:c.319G>A	ENSP00000256958.2:p.Gly107Arg	-	-	-	-	-	-
	12:21174670:G:A	chr12:21174670	A	ENSG00000134538	ENST00000256958	Transcript	missense_variant	424	320	107	G/E	gGa/gAa	COSV104563553	MODERATE	-	1	-	SNV	SLCO1B1	HGNC	HGNC:10959	protein_coding	YES	NM_006446.5	-	1	P1	CCDS8685.1	ENSP00000256958	Q9Y6L6.181	A0A024RAU7.41	UPI0000043BED	-	-	1	deleterious(0)	probably_damaging(1)	2023-04-15	-	Low_complexity_(Seg):seg,Transmembrane_helices:TMhelix,PROSITE_profiles:PS50850,PANTHER:PTHR11388,PANTHER:PTHR11388:SF82,Pfam:PF03137,TIGRFAM:TIGR00805,Superfamily:SSF103473	-	ENST00000256958.3:c.320G>A	ENSP00000256958.2:p.Gly107Glu	-	-	-	-	-	-
	12:21174684:G:A	chr12:21174684	A	ENSG00000134538	ENST00000256958	Transcript	missense_variant	438	334	112	A/T	Gct/Act	rs536660672,COSV57007411	MODERATE	-	1	-	SNV	SLCO1B1	HGNC	HGNC:10959	protein_coding	YES	NM_006446.5	-	1	P1	CCDS8685.1	ENSP00000256958	Q9Y6L6.181	A0A024RAU7.41	UPI0000043BED	-	-	1	deleterious(0)	probably_damaging(0.911)	2023-04-15	-	Transmembrane_helices:TMhelix,PROSITE_profiles:PS50850,PANTHER:PTHR11388,PANTHER:PTHR11388:SF82,Pfam:PF03137,TIGRFAM:TIGR00805,Superfamily:SSF103473	-	ENST00000256958.3:c.334G>A	ENSP00000256958.2:p.Ala112Thr	-	0.0002	0	0.0014	0	0
	12:21174686:T:C	chr12:21174686	C	ENSG00000134538	ENST00000256958	Transcript	synonymous_variant	440	336	112	A	gcT/gcC	COSV99918304	LOW	-	1	-	SNV	SLCO1B1	HGNC	HGNC:10959	protein_coding	YES	NM_006446.5	-	1	P1	CCDS8685.1	ENSP00000256958	Q9Y6L6.181	A0A024RAU7.41	UPI0000043BED	-	-	1	-	-	2023-04-15	-	Transmembrane_helices:TMhelix,PROSITE_profiles:PS50850,PANTHER:PTHR11388,PANTHER:PTHR11388:SF82,Pfam:PF03137,TIGRFAM:TIGR00805,Superfamily:SSF103473	-	ENST00000256958.3:c.336T>C	ENSP00000256958.2:p.Ala112%3D	-	-	-	-	-	-
	12:21174696:T:A	chr12:21174696	A	ENSG00000134538	ENST00000256958	Transcript	missense_variant	450	346	116	F/I	Ttc/Atc	-	MODERATE	-	1	-	SNV	SLCO1B1	HGNC	HGNC:10959	protein_coding	YES	NM_006446.5	-	1	P1	CCDS8685.1	ENSP00000256958	Q9Y6L6.181	A0A024RAU7.41	UPI0000043BED	-	-	1	deleterious(0)	probably_damaging(0.998)	2023-04-15	-	Transmembrane_helices:TMhelix,PROSITE_profiles:PS50850,PANTHER:PTHR11388,PANTHER:PTHR11388:SF82,Pfam:PF03137,TIGRFAM:TIGR00805,Superfamily:SSF103473	-	ENST00000256958.3:c.346T>A	ENSP00000256958.2:p.Phe116Ile	-	-	-	-	-	-
	12:21174700:T:C	chr12:21174700	C	ENSG00000134538	ENST00000256958	Transcript	missense_variant	454	350	117	F/S	tTc/tCc	-	MODERATE	-	1	-	SNV	SLCO1B1	HGNC	HGNC:10959	protein_coding	YES	NM_006446.5	-	1	P1	CCDS8685.1	ENSP00000256958	Q9Y6L6.181	A0A024RAU7.41	UPI0000043BED	-	-	1	deleterious(0)	probably_damaging(0.995)	2023-04-15	-	Transmembrane_helices:TMhelix,PROSITE_profiles:PS50850,PANTHER:PTHR11388,PANTHER:PTHR11388:SF82,Pfam:PF03137,TIGRFAM:TIGR00805,Superfamily:SSF103473	-	ENST00000256958.3:c.350T>C	ENSP00000256958.2:p.Phe117Ser	-	-	-	-	-	-
	12:21174701:C:T	chr12:21174701	T	ENSG00000134538	ENST00000256958	Transcript	synonymous_variant	455	351	117	F	ttC/ttT	rs1414521726,COSV57007918,COSV99918183	LOW	-	1	-	SNV	SLCO1B1	HGNC	HGNC:10959	protein_coding	YES	NM_006446.5	-	1	P1	CCDS8685.1	ENSP00000256958	Q9Y6L6.181	A0A024RAU7.41	UPI0000043BED	-	-	1	-	-	2023-04-15	-	Transmembrane_helices:TMhelix,PROSITE_profiles:PS50850,PANTHER:PTHR11388,PANTHER:PTHR11388:SF82,Pfam:PF03137,TIGRFAM:TIGR00805,Superfamily:SSF103473	-	ENST00000256958.3:c.351C>T	ENSP00000256958.2:p.Phe117%3D	-	-	-	-	-	-
	12:21174703:T:C	chr12:21174703	C	ENSG00000134538	ENST00000256958	Transcript	missense_variant	457	353	118	M/T	aTg/aCg	COSV57009512	MODERATE	-	1	-	SNV	SLCO1B1	HGNC	HGNC:10959	protein_coding	YES	NM_006446.5	-	1	P1	CCDS8685.1	ENSP00000256958	Q9Y6L6.181	A0A024RAU7.41	UPI0000043BED	-	-	1	deleterious(0)	probably_damaging(0.927)	2023-04-15	-	Transmembrane_helices:TMhelix,PROSITE_profiles:PS50850,PANTHER:PTHR11388,PANTHER:PTHR11388:SF82,Pfam:PF03137,TIGRFAM:TIGR00805,Superfamily:SSF103473	-	ENST00000256958.3:c.353T>C	ENSP00000256958.2:p.Met118Thr	-	-	-	-	-	-
	12:21174705:G:A	chr12:21174705	A	ENSG00000134538	ENST00000256958	Transcript	missense_variant	459	355	119	G/R	Gga/Aga	COSV57007971	MODERATE	-	1	-	SNV	SLCO1B1	HGNC	HGNC:10959	protein_coding	YES	NM_006446.5	-	1	P1	CCDS8685.1	ENSP00000256958	Q9Y6L6.181	A0A024RAU7.41	UPI0000043BED	-	-	1	deleterious(0)	probably_damaging(0.997)	2023-04-15	-	PROSITE_profiles:PS50850,PANTHER:PTHR11388,PANTHER:PTHR11388:SF82,Pfam:PF03137,TIGRFAM:TIGR00805,Superfamily:SSF103473	-	ENST00000256958.3:c.355G>A	ENSP00000256958.2:p.Gly119Arg	-	-	-	-	-	-
	12:21174708:T:C	chr12:21174708	C	ENSG00000134538	ENST00000256958	Transcript	missense_variant,splice_region_variant	462	358	120	Y/H	Tat/Cat	-	MODERATE	-	1	-	SNV	SLCO1B1	HGNC	HGNC:10959	protein_coding	YES	NM_006446.5	-	1	P1	CCDS8685.1	ENSP00000256958	Q9Y6L6.181	A0A024RAU7.41	UPI0000043BED	-	-	1	tolerated(0.07)	benign(0.081)	2023-04-15	-	PROSITE_profiles:PS50850,PANTHER:PTHR11388,PANTHER:PTHR11388:SF82,Pfam:PF03137,TIGRFAM:TIGR00805,Superfamily:SSF103473	-	ENST00000256958.3:c.358T>C	ENSP00000256958.2:p.Tyr120His	-	-	-	-	-	-
	12:21174708:TAGTA:T	chr12:21174709-21174712	-	ENSG00000134538	ENST00000256958	Transcript	splice_donor_variant,coding_sequence_variant,intron_variant	463-?	359-?	120-?	-	-	-	HIGH	-	1	-	deletion	SLCO1B1	HGNC	HGNC:10959	protein_coding	YES	NM_006446.5	-	1	P1	CCDS8685.1	ENSP00000256958	Q9Y6L6.181	A0A024RAU7.41	UPI0000043BED	-	-	1	-	-	2023-04-15	2023-04-14	-	-	ENST00000256958.3:c.359+3_359+6del	-	-	-	-	-	-	-
	12:21174710:G:T	chr12:21174710	T	ENSG00000134538	ENST00000256958	Transcript	splice_donor_variant	-	-	-	-	-	COSV57009209	HIGH	-	1	-	SNV	SLCO1B1	HGNC	HGNC:10959	protein_coding	YES	NM_006446.5	-	1	P1	CCDS8685.1	ENSP00000256958	Q9Y6L6.181	A0A024RAU7.41	UPI0000043BED	-	-	1	-	-	-	2023-04-14	-	-	ENST00000256958.3:c.359+1G>T	-	-	-	-	-	-	-
	12:21174715:T:G	chr12:21174715	G	ENSG00000134538	ENST00000256958	Transcript	splice_region_variant,intron_variant	-	-	-	-	-	-	LOW	-	1	-	SNV	SLCO1B1	HGNC	HGNC:10959	protein_coding	YES	NM_006446.5	-	1	P1	CCDS8685.1	ENSP00000256958	Q9Y6L6.181	A0A024RAU7.41	UPI0000043BED	-	-	1	-	-	-	2023-04-14	-	-	ENST00000256958.3:c.359+6T>G	-	-	-	-	-	-	-
	12:21174716:G:A	chr12:21174716	A	ENSG00000134538	ENST00000256958	Transcript	splice_region_variant,intron_variant	-	-	-	-	-	rs1328697726	LOW	-	1	-	SNV	SLCO1B1	HGNC	HGNC:10959	protein_coding	YES	NM_006446.5	-	1	P1	CCDS8685.1	ENSP00000256958	Q9Y6L6.181	A0A024RAU7.41	UPI0000043BED	-	-	1	-	-	-	2023-04-14	-	-	ENST00000256958.3:c.359+7G>A	-	-	-	-	-	-	-
	12:21174718:T:TA	chr12:21174718-21174719	A	ENSG00000134538	ENST00000256958	Transcript	intron_variant	-	-	-	-	-	rs4149095,COSV57007540	MODIFIER	-	1	-	insertion	SLCO1B1	HGNC	HGNC:10959	protein_coding	YES	NM_006446.5	-	1	P1	CCDS8685.1	ENSP00000256958	Q9Y6L6.181	A0A024RAU7.41	UPI0000043BED	-	-	1	-	-	-	2023-04-14	-	-	ENST00000256958.3:c.359+23dup	-	-	-	0.2519	0.389	0.4018	0.3837
	12:21174718:T:TAA	chr12:21174718-21174719	AA	ENSG00000134538	ENST00000256958	Transcript	intron_variant	-	-	-	-	-	rs4149095,COSV57007540	MODIFIER	-	1	-	insertion	SLCO1B1	HGNC	HGNC:10959	protein_coding	YES	NM_006446.5	-	1	P1	CCDS8685.1	ENSP00000256958	Q9Y6L6.181	A0A024RAU7.41	UPI0000043BED	-	-	1	-	-	-	2023-04-14	-	-	ENST00000256958.3:c.359+22_359+23dup	-	-	-	0.0234	0.0965	0.0288	0.0567
	12:21174718:T:TAAA	chr12:21174718-21174719	AAA	ENSG00000134538	ENST00000256958	Transcript	intron_variant	-	-	-	-	-	rs4149095,COSV57007540	MODIFIER	-	1	-	insertion	SLCO1B1	HGNC	HGNC:10959	protein_coding	YES	NM_006446.5	-	1	P1	CCDS8685.1	ENSP00000256958	Q9Y6L6.181	A0A024RAU7.41	UPI0000043BED	-	-	1	-	-	-	2023-04-14	-	-	ENST00000256958.3:c.359+21_359+23dup	-	-	-	0.0182	0.0029	0.001	0.001
	12:21174718:TA:T	chr12:21174719	-	ENSG00000134538	ENST00000256958	Transcript	intron_variant	-	-	-	-	-	rs4149095	MODIFIER	-	1	-	deletion	SLCO1B1	HGNC	HGNC:10959	protein_coding	YES	NM_006446.5	-	1	P1	CCDS8685.1	ENSP00000256958	Q9Y6L6.181	A0A024RAU7.41	UPI0000043BED	-	-	1	-	-	-	2023-04-14	-	-	ENST00000256958.3:c.359+23del	-	-	-	0.1097	0.0403	0.0417	0.0368
	12:21174724:A:AT	chr12:21174724-21174725	T	ENSG00000134538	ENST00000256958	Transcript	intron_variant	-	-	-	-	-	-	MODIFIER	-	1	-	insertion	SLCO1B1	HGNC	HGNC:10959	protein_coding	YES	NM_006446.5	-	1	P1	CCDS8685.1	ENSP00000256958	Q9Y6L6.181	A0A024RAU7.41	UPI0000043BED	-	-	1	-	-	-	2023-04-14	-	-	ENST00000256958.3:c.359+15_359+16insT	-	-	-	-	-	-	-
	12:21174728:A:G	chr12:21174728	G	ENSG00000134538	ENST00000256958	Transcript	intron_variant	-	-	-	-	-	rs751961472	MODIFIER	-	1	-	SNV	SLCO1B1	HGNC	HGNC:10959	protein_coding	YES	NM_006446.5	-	1	P1	CCDS8685.1	ENSP00000256958	Q9Y6L6.181	A0A024RAU7.41	UPI0000043BED	-	-	1	-	-	-	2023-04-14	-	-	ENST00000256958.3:c.359+19A>G	-	-	-	-	-	-	-
	12:21174729:A:AC	chr12:21174729-21174730	C	ENSG00000134538	ENST00000256958	Transcript	intron_variant	-	-	-	-	-	rs767074562	MODIFIER	-	1	-	insertion	SLCO1B1	HGNC	HGNC:10959	protein_coding	YES	NM_006446.5	-	1	P1	CCDS8685.1	ENSP00000256958	Q9Y6L6.181	A0A024RAU7.41	UPI0000043BED	-	-	1	-	-	-	2023-04-14	-	-	ENST00000256958.3:c.359+20_359+21insC	-	-	-	-	-	-	-
	12:21174729:A:C	chr12:21174729	C	ENSG00000134538	ENST00000256958	Transcript	intron_variant	-	-	-	-	-	rs755897728	MODIFIER	-	1	-	SNV	SLCO1B1	HGNC	HGNC:10959	protein_coding	YES	NM_006446.5	-	1	P1	CCDS8685.1	ENSP00000256958	Q9Y6L6.181	A0A024RAU7.41	UPI0000043BED	-	-	1	-	-	-	2023-04-14	-	-	ENST00000256958.3:c.359+20A>C	-	-	-	-	-	-	-
	12:21174731:A:AC	chr12:21174731-21174732	C	ENSG00000134538	ENST00000256958	Transcript	intron_variant	-	-	-	-	-	-	MODIFIER	-	1	-	insertion	SLCO1B1	HGNC	HGNC:10959	protein_coding	YES	NM_006446.5	-	1	P1	CCDS8685.1	ENSP00000256958	Q9Y6L6.181	A0A024RAU7.41	UPI0000043BED	-	-	1	-	-	-	2023-04-14	-	-	ENST00000256958.3:c.359+22_359+23insC	-	-	-	-	-	-	-
	12:21174731:A:C	chr12:21174731	C	ENSG00000134538	ENST00000256958	Transcript	intron_variant	-	-	-	-	-	rs779822784	MODIFIER	-	1	-	SNV	SLCO1B1	HGNC	HGNC:10959	protein_coding	YES	NM_006446.5	-	1	P1	CCDS8685.1	ENSP00000256958	Q9Y6L6.181	A0A024RAU7.41	UPI0000043BED	-	-	1	-	-	-	2023-04-14	-	-	ENST00000256958.3:c.359+22A>C	-	-	-	-	-	-	-
	12:21174736:C:T	chr12:21174736	T	ENSG00000134538	ENST00000256958	Transcript	intron_variant	-	-	-	-	-	rs754401503	MODIFIER	-	1	-	SNV	SLCO1B1	HGNC	HGNC:10959	protein_coding	YES	NM_006446.5	-	1	P1	CCDS8685.1	ENSP00000256958	Q9Y6L6.181	A0A024RAU7.41	UPI0000043BED	-	-	1	-	-	-	2023-04-14	-	-	ENST00000256958.3:c.359+27C>T	-	-	-	-	-	-	-
	12:21174740:GCCACTATCAGTA:G	chr12:21174741-21174752	-	ENSG00000134538	ENST00000256958	Transcript	intron_variant	-	-	-	-	-	-	MODIFIER	-	1	-	deletion	SLCO1B1	HGNC	HGNC:10959	protein_coding	YES	NM_006446.5	-	1	P1	CCDS8685.1	ENSP00000256958	Q9Y6L6.181	A0A024RAU7.41	UPI0000043BED	-	-	1	-	-	-	2023-04-14	-	-	ENST00000256958.3:c.359+34_359+45del	-	-	-	-	-	-	-
	12:21174746:A:C	chr12:21174746	C	ENSG00000134538	ENST00000256958	Transcript	intron_variant	-	-	-	-	-	-	MODIFIER	-	1	-	SNV	SLCO1B1	HGNC	HGNC:10959	protein_coding	YES	NM_006446.5	-	1	P1	CCDS8685.1	ENSP00000256958	Q9Y6L6.181	A0A024RAU7.41	UPI0000043BED	-	-	1	-	-	-	2023-04-14	-	-	ENST00000256958.3:c.359+37A>C	-	-	-	-	-	-	-
	12:21174750:G:A	chr12:21174750	A	ENSG00000134538	ENST00000256958	Transcript	intron_variant	-	-	-	-	-	rs778943765	MODIFIER	-	1	-	SNV	SLCO1B1	HGNC	HGNC:10959	protein_coding	YES	NM_006446.5	-	1	P1	CCDS8685.1	ENSP00000256958	Q9Y6L6.181	A0A024RAU7.41	UPI0000043BED	-	-	1	-	-	-	2023-04-14	-	-	ENST00000256958.3:c.359+41G>A	-	-	-	-	-	-	-
	12:21174754:C:T	chr12:21174754	T	ENSG00000134538	ENST00000256958	Transcript	intron_variant	-	-	-	-	-	-	MODIFIER	-	1	-	SNV	SLCO1B1	HGNC	HGNC:10959	protein_coding	YES	NM_006446.5	-	1	P1	CCDS8685.1	ENSP00000256958	Q9Y6L6.181	A0A024RAU7.41	UPI0000043BED	-	-	1	-	-	-	2023-04-14	-	-	ENST00000256958.3:c.359+45C>T	-	-	-	-	-	-	-
	12:21174755:T:C	chr12:21174755	C	ENSG00000134538	ENST00000256958	Transcript	intron_variant	-	-	-	-	-	-	MODIFIER	-	1	-	SNV	SLCO1B1	HGNC	HGNC:10959	protein_coding	YES	NM_006446.5	-	1	P1	CCDS8685.1	ENSP00000256958	Q9Y6L6.181	A0A024RAU7.41	UPI0000043BED	-	-	1	-	-	-	2023-04-14	-	-	ENST00000256958.3:c.359+46T>C	-	-	-	-	-	-	-
	12:21174764:A:G	chr12:21174764	G	ENSG00000134538	ENST00000256958	Transcript	intron_variant	-	-	-	-	-	-	MODIFIER	-	1	-	SNV	SLCO1B1	HGNC	HGNC:10959	protein_coding	YES	NM_006446.5	-	1	P1	CCDS8685.1	ENSP00000256958	Q9Y6L6.181	A0A024RAU7.41	UPI0000043BED	-	-	1	-	-	-	2023-04-14	-	-	ENST00000256958.3:c.359+55A>G	-	-	-	-	-	-	-
	12:21174765:G:A	chr12:21174765	A	ENSG00000134538	ENST00000256958	Transcript	intron_variant	-	-	-	-	-	-	MODIFIER	-	1	-	SNV	SLCO1B1	HGNC	HGNC:10959	protein_coding	YES	NM_006446.5	-	1	P1	CCDS8685.1	ENSP00000256958	Q9Y6L6.181	A0A024RAU7.41	UPI0000043BED	-	-	1	-	-	-	2023-04-14	-	-	ENST00000256958.3:c.359+56G>A	-	-	-	-	-	-	-
	12:21174767:A:G	chr12:21174767	G	ENSG00000134538	ENST00000256958	Transcript	intron_variant	-	-	-	-	-	rs376596782	MODIFIER	-	1	-	SNV	SLCO1B1	HGNC	HGNC:10959	protein_coding	YES	NM_006446.5	-	1	P1	CCDS8685.1	ENSP00000256958	Q9Y6L6.181	A0A024RAU7.41	UPI0000043BED	-	-	1	-	-	-	2023-04-14	-	-	ENST00000256958.3:c.359+58A>G	-	-	0.001	0	0	0	0
	12:21174771:G:T	chr12:21174771	T	ENSG00000134538	ENST00000256958	Transcript	intron_variant	-	-	-	-	-	-	MODIFIER	-	1	-	SNV	SLCO1B1	HGNC	HGNC:10959	protein_coding	YES	NM_006446.5	-	1	P1	CCDS8685.1	ENSP00000256958	Q9Y6L6.181	A0A024RAU7.41	UPI0000043BED	-	-	1	-	-	-	2023-04-14	-	-	ENST00000256958.3:c.359+62G>T	-	-	-	-	-	-	-
	12:21174773:A:G	chr12:21174773	G	ENSG00000134538	ENST00000256958	Transcript	intron_variant	-	-	-	-	-	-	MODIFIER	-	1	-	SNV	SLCO1B1	HGNC	HGNC:10959	protein_coding	YES	NM_006446.5	-	1	P1	CCDS8685.1	ENSP00000256958	Q9Y6L6.181	A0A024RAU7.41	UPI0000043BED	-	-	1	-	-	-	2023-04-14	-	-	ENST00000256958.3:c.359+64A>G	-	-	-	-	-	-	-
	12:21174774:T:C	chr12:21174774	C	ENSG00000134538	ENST00000256958	Transcript	intron_variant	-	-	-	-	-	rs878946267	MODIFIER	-	1	-	SNV	SLCO1B1	HGNC	HGNC:10959	protein_coding	YES	NM_006446.5	-	1	P1	CCDS8685.1	ENSP00000256958	Q9Y6L6.181	A0A024RAU7.41	UPI0000043BED	-	-	1	-	-	-	2023-04-14	-	-	ENST00000256958.3:c.359+65T>C	-	-	-	-	-	-	-
	12:21174775:T:G	chr12:21174775	G	ENSG00000134538	ENST00000256958	Transcript	intron_variant	-	-	-	-	-	-	MODIFIER	-	1	-	SNV	SLCO1B1	HGNC	HGNC:10959	protein_coding	YES	NM_006446.5	-	1	P1	CCDS8685.1	ENSP00000256958	Q9Y6L6.181	A0A024RAU7.41	UPI0000043BED	-	-	1	-	-	-	2023-04-14	-	-	ENST00000256958.3:c.359+66T>G	-	-	-	-	-	-	-
	12:21174788:C:A	chr12:21174788	A	ENSG00000134538	ENST00000256958	Transcript	intron_variant	-	-	-	-	-	rs879068872	MODIFIER	-	1	-	SNV	SLCO1B1	HGNC	HGNC:10959	protein_coding	YES	NM_006446.5	-	1	P1	CCDS8685.1	ENSP00000256958	Q9Y6L6.181	A0A024RAU7.41	UPI0000043BED	-	-	1	-	-	-	2023-04-14	-	-	ENST00000256958.3:c.359+79C>A	-	-	-	-	-	-	-
	12:21174803:T:C	chr12:21174803	C	ENSG00000134538	ENST00000256958	Transcript	intron_variant	-	-	-	-	-	-	MODIFIER	-	1	-	SNV	SLCO1B1	HGNC	HGNC:10959	protein_coding	YES	NM_006446.5	-	1	P1	CCDS8685.1	ENSP00000256958	Q9Y6L6.181	A0A024RAU7.41	UPI0000043BED	-	-	1	-	-	-	2023-04-14	-	-	ENST00000256958.3:c.359+94T>C	-	-	-	-	-	-	-
	12:21174804:A:G	chr12:21174804	G	ENSG00000134538	ENST00000256958	Transcript	intron_variant	-	-	-	-	-	-	MODIFIER	-	1	-	SNV	SLCO1B1	HGNC	HGNC:10959	protein_coding	YES	NM_006446.5	-	1	P1	CCDS8685.1	ENSP00000256958	Q9Y6L6.181	A0A024RAU7.41	UPI0000043BED	-	-	1	-	-	-	2023-04-14	-	-	ENST00000256958.3:c.359+95A>G	-	-	-	-	-	-	-
	12:21174806:C:A	chr12:21174806	A	ENSG00000134538	ENST00000256958	Transcript	intron_variant	-	-	-	-	-	rs4149036	MODIFIER	-	1	-	SNV	SLCO1B1	HGNC	HGNC:10959	protein_coding	YES	NM_006446.5	-	1	P1	CCDS8685.1	ENSP00000256958	Q9Y6L6.181	A0A024RAU7.41	UPI0000043BED	-	-	1	-	-	-	2023-04-14	-	-	ENST00000256958.3:c.359+97C>A	-	-	0.3542	0.556	0.219	0.499	0.2237
	12:21176676:A:G	chr12:21176676	G	ENSG00000134538	ENST00000256958	Transcript	intron_variant	-	-	-	-	-	-	MODIFIER	-	1	-	SNV	SLCO1B1	HGNC	HGNC:10959	protein_coding	YES	NM_006446.5	-	1	P1	CCDS8685.1	ENSP00000256958	Q9Y6L6.181	A0A024RAU7.41	UPI0000043BED	-	-	1	-	-	-	2023-04-14	-	-	ENST00000256958.3:c.360-100A>G	-	-	-	-	-	-	-
	12:21176679:A:G	chr12:21176679	G	ENSG00000134538	ENST00000256958	Transcript	intron_variant	-	-	-	-	-	rs1228189983	MODIFIER	-	1	-	SNV	SLCO1B1	HGNC	HGNC:10959	protein_coding	YES	NM_006446.5	-	1	P1	CCDS8685.1	ENSP00000256958	Q9Y6L6.181	A0A024RAU7.41	UPI0000043BED	-	-	1	-	-	-	2023-04-14	-	-	ENST00000256958.3:c.360-97A>G	-	-	-	-	-	-	-
	12:21176682:G:T	chr12:21176682	T	ENSG00000134538	ENST00000256958	Transcript	intron_variant	-	-	-	-	-	rs1234790984	MODIFIER	-	1	-	SNV	SLCO1B1	HGNC	HGNC:10959	protein_coding	YES	NM_006446.5	-	1	P1	CCDS8685.1	ENSP00000256958	Q9Y6L6.181	A0A024RAU7.41	UPI0000043BED	-	-	1	-	-	-	2023-04-14	-	-	ENST00000256958.3:c.360-94G>T	-	-	-	-	-	-	-
	12:21176691:A:C	chr12:21176691	C	ENSG00000134538	ENST00000256958	Transcript	intron_variant	-	-	-	-	-	rs1436477373	MODIFIER	-	1	-	SNV	SLCO1B1	HGNC	HGNC:10959	protein_coding	YES	NM_006446.5	-	1	P1	CCDS8685.1	ENSP00000256958	Q9Y6L6.181	A0A024RAU7.41	UPI0000043BED	-	-	1	-	-	-	2023-04-14	-	-	ENST00000256958.3:c.360-85A>C	-	-	-	-	-	-	-
	12:21176695:G:A	chr12:21176695	A	ENSG00000134538	ENST00000256958	Transcript	intron_variant	-	-	-	-	-	rs190580693	MODIFIER	-	1	-	SNV	SLCO1B1	HGNC	HGNC:10959	protein_coding	YES	NM_006446.5	-	1	P1	CCDS8685.1	ENSP00000256958	Q9Y6L6.181	A0A024RAU7.41	UPI0000043BED	-	-	1	-	-	-	2023-04-14	-	-	ENST00000256958.3:c.360-81G>A	-	-	0.0026	0	0.0029	0	0
	12:21176696:G:A	chr12:21176696	A	ENSG00000134538	ENST00000256958	Transcript	intron_variant	-	-	-	-	-	-	MODIFIER	-	1	-	SNV	SLCO1B1	HGNC	HGNC:10959	protein_coding	YES	NM_006446.5	-	1	P1	CCDS8685.1	ENSP00000256958	Q9Y6L6.181	A0A024RAU7.41	UPI0000043BED	-	-	1	-	-	-	2023-04-14	-	-	ENST00000256958.3:c.360-80G>A	-	-	-	-	-	-	-
	12:21176697:A:G	chr12:21176697	G	ENSG00000134538	ENST00000256958	Transcript	intron_variant	-	-	-	-	-	-	MODIFIER	-	1	-	SNV	SLCO1B1	HGNC	HGNC:10959	protein_coding	YES	NM_006446.5	-	1	P1	CCDS8685.1	ENSP00000256958	Q9Y6L6.181	A0A024RAU7.41	UPI0000043BED	-	-	1	-	-	-	2023-04-14	-	-	ENST00000256958.3:c.360-79A>G	-	-	-	-	-	-	-
	12:21176697:A:T	chr12:21176697	T	ENSG00000134538	ENST00000256958	Transcript	intron_variant	-	-	-	-	-	rs754179570	MODIFIER	-	1	-	SNV	SLCO1B1	HGNC	HGNC:10959	protein_coding	YES	NM_006446.5	-	1	P1	CCDS8685.1	ENSP00000256958	Q9Y6L6.181	A0A024RAU7.41	UPI0000043BED	-	-	1	-	-	-	2023-04-14	-	-	ENST00000256958.3:c.360-79A>T	-	-	-	-	-	-	-
	12:21176698:A:C	chr12:21176698	C	ENSG00000134538	ENST00000256958	Transcript	intron_variant	-	-	-	-	-	-	MODIFIER	-	1	-	SNV	SLCO1B1	HGNC	HGNC:10959	protein_coding	YES	NM_006446.5	-	1	P1	CCDS8685.1	ENSP00000256958	Q9Y6L6.181	A0A024RAU7.41	UPI0000043BED	-	-	1	-	-	-	2023-04-14	-	-	ENST00000256958.3:c.360-78A>C	-	-	-	-	-	-	-
	12:21176704:C:T	chr12:21176704	T	ENSG00000134538	ENST00000256958	Transcript	intron_variant	-	-	-	-	-	-	MODIFIER	-	1	-	SNV	SLCO1B1	HGNC	HGNC:10959	protein_coding	YES	NM_006446.5	-	1	P1	CCDS8685.1	ENSP00000256958	Q9Y6L6.181	A0A024RAU7.41	UPI0000043BED	-	-	1	-	-	-	2023-04-14	-	-	ENST00000256958.3:c.360-72C>T	-	-	-	-	-	-	-
	12:21176706:CTG:C	chr12:21176707-21176708	-	ENSG00000134538	ENST00000256958	Transcript	intron_variant	-	-	-	-	-	-	MODIFIER	-	1	-	deletion	SLCO1B1	HGNC	HGNC:10959	protein_coding	YES	NM_006446.5	-	1	P1	CCDS8685.1	ENSP00000256958	Q9Y6L6.181	A0A024RAU7.41	UPI0000043BED	-	-	1	-	-	-	2023-04-14	-	-	ENST00000256958.3:c.360-68_360-67del	-	-	-	-	-	-	-
	12:21176709:T:C	chr12:21176709	C	ENSG00000134538	ENST00000256958	Transcript	intron_variant	-	-	-	-	-	rs751150442	MODIFIER	-	1	-	SNV	SLCO1B1	HGNC	HGNC:10959	protein_coding	YES	NM_006446.5	-	1	P1	CCDS8685.1	ENSP00000256958	Q9Y6L6.181	A0A024RAU7.41	UPI0000043BED	-	-	1	-	-	-	2023-04-14	-	-	ENST00000256958.3:c.360-67T>C	-	-	-	-	-	-	-
	12:21176710:A:G	chr12:21176710	G	ENSG00000134538	ENST00000256958	Transcript	intron_variant	-	-	-	-	-	rs182769903	MODIFIER	-	1	-	SNV	SLCO1B1	HGNC	HGNC:10959	protein_coding	YES	NM_006446.5	-	1	P1	CCDS8685.1	ENSP00000256958	Q9Y6L6.181	A0A024RAU7.41	UPI0000043BED	-	-	1	-	-	-	2023-04-14	-	-	ENST00000256958.3:c.360-66A>G	-	-	0.0014	0.0053	0	0	0
	12:21176747:A:G	chr12:21176747	G	ENSG00000134538	ENST00000256958	Transcript	intron_variant	-	-	-	-	-	-	MODIFIER	-	1	-	SNV	SLCO1B1	HGNC	HGNC:10959	protein_coding	YES	NM_006446.5	-	1	P1	CCDS8685.1	ENSP00000256958	Q9Y6L6.181	A0A024RAU7.41	UPI0000043BED	-	-	1	-	-	-	2023-04-14	-	-	ENST00000256958.3:c.360-29A>G	-	-	-	-	-	-	-
	12:21176751:G:C	chr12:21176751	C	ENSG00000134538	ENST00000256958	Transcript	intron_variant	-	-	-	-	-	-	MODIFIER	-	1	-	SNV	SLCO1B1	HGNC	HGNC:10959	protein_coding	YES	NM_006446.5	-	1	P1	CCDS8685.1	ENSP00000256958	Q9Y6L6.181	A0A024RAU7.41	UPI0000043BED	-	-	1	-	-	-	2023-04-14	-	-	ENST00000256958.3:c.360-25G>C	-	-	-	-	-	-	-
	12:21176762:T:A	chr12:21176762	A	ENSG00000134538	ENST00000256958	Transcript	intron_variant	-	-	-	-	-	-	MODIFIER	-	1	-	SNV	SLCO1B1	HGNC	HGNC:10959	protein_coding	YES	NM_006446.5	-	1	P1	CCDS8685.1	ENSP00000256958	Q9Y6L6.181	A0A024RAU7.41	UPI0000043BED	-	-	1	-	-	-	2023-04-14	-	-	ENST00000256958.3:c.360-14T>A	-	-	-	-	-	-	-
	12:21176764:A:T	chr12:21176764	T	ENSG00000134538	ENST00000256958	Transcript	intron_variant	-	-	-	-	-	-	MODIFIER	-	1	-	SNV	SLCO1B1	HGNC	HGNC:10959	protein_coding	YES	NM_006446.5	-	1	P1	CCDS8685.1	ENSP00000256958	Q9Y6L6.181	A0A024RAU7.41	UPI0000043BED	-	-	1	-	-	-	2023-04-14	-	-	ENST00000256958.3:c.360-12A>T	-	-	-	-	-	-	-
	12:21176765:T:A	chr12:21176765	A	ENSG00000134538	ENST00000256958	Transcript	intron_variant	-	-	-	-	-	rs777607309	MODIFIER	-	1	-	SNV	SLCO1B1	HGNC	HGNC:10959	protein_coding	YES	NM_006446.5	-	1	P1	CCDS8685.1	ENSP00000256958	Q9Y6L6.181	A0A024RAU7.41	UPI0000043BED	-	-	1	-	-	-	2023-04-14	-	-	ENST00000256958.3:c.360-11T>A	-	-	-	-	-	-	-
	12:21176766:G:A	chr12:21176766	A	ENSG00000134538	ENST00000256958	Transcript	intron_variant	-	-	-	-	-	-	MODIFIER	-	1	-	SNV	SLCO1B1	HGNC	HGNC:10959	protein_coding	YES	NM_006446.5	-	1	P1	CCDS8685.1	ENSP00000256958	Q9Y6L6.181	A0A024RAU7.41	UPI0000043BED	-	-	1	-	-	-	2023-04-14	-	-	ENST00000256958.3:c.360-10G>A	-	-	-	-	-	-	-
	12:21176772:A:G	chr12:21176772	G	ENSG00000134538	ENST00000256958	Transcript	splice_region_variant,intron_variant	-	-	-	-	-	-	LOW	-	1	-	SNV	SLCO1B1	HGNC	HGNC:10959	protein_coding	YES	NM_006446.5	-	1	P1	CCDS8685.1	ENSP00000256958	Q9Y6L6.181	A0A024RAU7.41	UPI0000043BED	-	-	1	-	-	-	2023-04-14	-	-	ENST00000256958.3:c.360-4A>G	-	-	-	-	-	-	-
	12:21176782:G:A	chr12:21176782	A	ENSG00000134538	ENST00000256958	Transcript	synonymous_variant	470	366	122	R	agG/agA	rs756788386	LOW	-	1	-	SNV	SLCO1B1	HGNC	HGNC:10959	protein_coding	YES	NM_006446.5	-	1	P1	CCDS8685.1	ENSP00000256958	Q9Y6L6.181	A0A024RAU7.41	UPI0000043BED	-	-	1	-	-	2023-05-15	-	PROSITE_profiles:PS50850,PANTHER:PTHR11388,PANTHER:PTHR11388:SF82,Pfam:PF03137,TIGRFAM:TIGR00805,Superfamily:SSF103473	-	ENST00000256958.3:c.366G>A	ENSP00000256958.2:p.Arg122%3D	-	-	-	-	-	-
	12:21176790:A:G	chr12:21176790	G	ENSG00000134538	ENST00000256958	Transcript	missense_variant	478	374	125	K/R	aAa/aGa	-	MODERATE	-	1	-	SNV	SLCO1B1	HGNC	HGNC:10959	protein_coding	YES	NM_006446.5	-	1	P1	CCDS8685.1	ENSP00000256958	Q9Y6L6.181	A0A024RAU7.41	UPI0000043BED	-	-	1	tolerated(0.26)	benign(0.098)	2023-05-15	-	Low_complexity_(Seg):seg,PROSITE_profiles:PS50850,PANTHER:PTHR11388,PANTHER:PTHR11388:SF82,Pfam:PF03137,TIGRFAM:TIGR00805,Superfamily:SSF103473	-	ENST00000256958.3:c.374A>G	ENSP00000256958.2:p.Lys125Arg	-	-	-	-	-	-
	12:21176795:A:C	chr12:21176795	C	ENSG00000134538	ENST00000256958	Transcript	missense_variant	483	379	127	T/P	Act/Cct	COSV57014874	MODERATE	-	1	-	SNV	SLCO1B1	HGNC	HGNC:10959	protein_coding	YES	NM_006446.5	-	1	P1	CCDS8685.1	ENSP00000256958	Q9Y6L6.181	A0A024RAU7.41	UPI0000043BED	-	-	1	tolerated(0.05)	benign(0.389)	2023-05-15	-	Low_complexity_(Seg):seg,PROSITE_profiles:PS50850,PANTHER:PTHR11388,PANTHER:PTHR11388:SF82,Pfam:PF03137,TIGRFAM:TIGR00805,Superfamily:SSF103473	-	ENST00000256958.3:c.379A>C	ENSP00000256958.2:p.Thr127Pro	-	-	-	-	-	-
	12:21176796:C:G	chr12:21176796	G	ENSG00000134538	ENST00000256958	Transcript	missense_variant	484	380	127	T/S	aCt/aGt	rs569028384	MODERATE	-	1	-	SNV	SLCO1B1	HGNC	HGNC:10959	protein_coding	YES	NM_006446.5	-	1	P1	CCDS8685.1	ENSP00000256958	Q9Y6L6.181	A0A024RAU7.41	UPI0000043BED	-	-	1	tolerated(0.59)	benign(0.01)	2023-05-15	-	Low_complexity_(Seg):seg,PROSITE_profiles:PS50850,PANTHER:PTHR11388,PANTHER:PTHR11388:SF82,Pfam:PF03137,TIGRFAM:TIGR00805,Superfamily:SSF103473	-	ENST00000256958.3:c.380C>G	ENSP00000256958.2:p.Thr127Ser	-	0.0002	0	0	0	0
	12:21176803:C:T	chr12:21176803	T	ENSG00000134538	ENST00000256958	Transcript	synonymous_variant	491	387	129	I	atC/atT	COSV57008544	LOW	-	1	-	SNV	SLCO1B1	HGNC	HGNC:10959	protein_coding	YES	NM_006446.5	-	1	P1	CCDS8685.1	ENSP00000256958	Q9Y6L6.181	A0A024RAU7.41	UPI0000043BED	-	-	1	-	-	2023-05-15	-	Low_complexity_(Seg):seg,PROSITE_profiles:PS50850,PANTHER:PTHR11388,PANTHER:PTHR11388:SF82,Pfam:PF03137,TIGRFAM:TIGR00805,Superfamily:SSF103473	-	ENST00000256958.3:c.387C>T	ENSP00000256958.2:p.Ile129%3D	-	-	-	-	-	-
	12:21176803:CAA:C	chr12:21176804-21176805	-	ENSG00000134538	ENST00000256958	Transcript	frameshift_variant	492-493	388-389	130	N/X	AAt/t	-	HIGH	-	1	-	deletion	SLCO1B1	HGNC	HGNC:10959	protein_coding	YES	NM_006446.5	-	1	P1	CCDS8685.1	ENSP00000256958	Q9Y6L6.181	A0A024RAU7.41	UPI0000043BED	-	-	1	-	-	2023-05-15	-	Low_complexity_(Seg):seg,PROSITE_profiles:PS50850,PANTHER:PTHR11388,PANTHER:PTHR11388:SF82,Pfam:PF03137,TIGRFAM:TIGR00805,Superfamily:SSF103473	-	ENST00000256958.3:c.388_389del	ENSP00000256958.2:p.Asn130PhefsTer15	-	-	-	-	-	-
	12:21176804:A:G	chr12:21176804	G	ENSG00000134538	ENST00000256958	Transcript	missense_variant	492	388	130	N/D	Aat/Gat	rs2306283,CM043776,COSV57012766	MODERATE	-	1	-	SNV	SLCO1B1	HGNC	HGNC:10959	protein_coding	YES	NM_006446.5	-	1	P1	CCDS8685.1	ENSP00000256958	Q9Y6L6.181	A0A024RAU7.41	UPI0000043BED	-	-	1	tolerated(0.33)	benign(0.003)	2023-05-15	-	Low_complexity_(Seg):seg,PROSITE_profiles:PS50850,PANTHER:PTHR11388,PANTHER:PTHR11388:SF82,Pfam:PF03137,TIGRFAM:TIGR00805,Superfamily:SSF103473	-	ENST00000256958.3:c.388A>G	ENSP00000256958.2:p.Asn130Asp	-	-	0.8177	0.4726	0.7619	0.4026
	12:21176805:A:G	chr12:21176805	G	ENSG00000134538	ENST00000256958	Transcript	missense_variant	493	389	130	N/S	aAt/aGt	-	MODERATE	-	1	-	SNV	SLCO1B1	HGNC	HGNC:10959	protein_coding	YES	NM_006446.5	-	1	P1	CCDS8685.1	ENSP00000256958	Q9Y6L6.181	A0A024RAU7.41	UPI0000043BED	-	-	1	tolerated(0.27)	benign(0.001)	2023-05-15	-	Low_complexity_(Seg):seg,PROSITE_profiles:PS50850,PANTHER:PTHR11388,PANTHER:PTHR11388:SF82,Pfam:PF03137,TIGRFAM:TIGR00805,Superfamily:SSF103473	-	ENST00000256958.3:c.389A>G	ENSP00000256958.2:p.Asn130Ser	-	-	-	-	-	-
	12:21176806:T:C	chr12:21176806	C	ENSG00000134538	ENST00000256958	Transcript	synonymous_variant	494	390	130	N	aaT/aaC	COSV57017097	LOW	-	1	-	SNV	SLCO1B1	HGNC	HGNC:10959	protein_coding	YES	NM_006446.5	-	1	P1	CCDS8685.1	ENSP00000256958	Q9Y6L6.181	A0A024RAU7.41	UPI0000043BED	-	-	1	-	-	2023-05-15	-	Low_complexity_(Seg):seg,PROSITE_profiles:PS50850,PANTHER:PTHR11388,PANTHER:PTHR11388:SF82,Pfam:PF03137,TIGRFAM:TIGR00805,Superfamily:SSF103473	-	ENST00000256958.3:c.390T>C	ENSP00000256958.2:p.Asn130%3D	-	-	-	-	-	-
	12:21176807:T:C	chr12:21176807	C	ENSG00000134538	ENST00000256958	Transcript	missense_variant	495	391	131	S/P	Tca/Cca	-	MODERATE	-	1	-	SNV	SLCO1B1	HGNC	HGNC:10959	protein_coding	YES	NM_006446.5	-	1	P1	CCDS8685.1	ENSP00000256958	Q9Y6L6.181	A0A024RAU7.41	UPI0000043BED	-	-	1	tolerated(0.64)	benign(0.003)	2023-05-15	-	Low_complexity_(Seg):seg,PROSITE_profiles:PS50850,PANTHER:PTHR11388,PANTHER:PTHR11388:SF82,Pfam:PF03137,TIGRFAM:TIGR00805,Superfamily:SSF103473	-	ENST00000256958.3:c.391T>C	ENSP00000256958.2:p.Ser131Pro	-	-	-	-	-	-
	12:21176808:C:A	chr12:21176808	A	ENSG00000134538	ENST00000256958	Transcript	stop_gained	496	392	131	S/*	tCa/tAa	COSV57008183,COSV57016269	HIGH	-	1	-	SNV	SLCO1B1	HGNC	HGNC:10959	protein_coding	YES	NM_006446.5	-	1	P1	CCDS8685.1	ENSP00000256958	Q9Y6L6.181	A0A024RAU7.41	UPI0000043BED	-	-	1	-	-	2023-05-15	-	Low_complexity_(Seg):seg,PROSITE_profiles:PS50850,PANTHER:PTHR11388,PANTHER:PTHR11388:SF82,Pfam:PF03137,TIGRFAM:TIGR00805,Superfamily:SSF103473	-	ENST00000256958.3:c.392C>A	ENSP00000256958.2:p.Ser131Ter	-	-	-	-	-	-
	12:21176809:A:G	chr12:21176809	G	ENSG00000134538	ENST00000256958	Transcript	synonymous_variant	497	393	131	S	tcA/tcG	rs776079352	LOW	-	1	-	SNV	SLCO1B1	HGNC	HGNC:10959	protein_coding	YES	NM_006446.5	-	1	P1	CCDS8685.1	ENSP00000256958	Q9Y6L6.181	A0A024RAU7.41	UPI0000043BED	-	-	1	-	-	2023-05-15	-	Low_complexity_(Seg):seg,PROSITE_profiles:PS50850,PANTHER:PTHR11388,PANTHER:PTHR11388:SF82,Pfam:PF03137,TIGRFAM:TIGR00805,Superfamily:SSF103473	-	ENST00000256958.3:c.393A>G	ENSP00000256958.2:p.Ser131%3D	-	-	-	-	-	-
	12:21176813:G:GA	chr12:21176813-21176814	A	ENSG00000134538	ENST00000256958	Transcript	frameshift_variant	501-502	397-398	133	E/EX	gaa/gAaa	rs1250465473	HIGH	-	1	-	insertion	SLCO1B1	HGNC	HGNC:10959	protein_coding	YES	NM_006446.5	-	1	P1	CCDS8685.1	ENSP00000256958	Q9Y6L6.181	A0A024RAU7.41	UPI0000043BED	-	-	1	-	-	2023-05-15	-	Low_complexity_(Seg):seg,PROSITE_profiles:PS50850,PANTHER:PTHR11388,PANTHER:PTHR11388:SF82,Pfam:PF03137,TIGRFAM:TIGR00805,Superfamily:SSF103473	-	ENST00000256958.3:c.401dup	ENSP00000256958.2:p.Asn134LysfsTer12	4	-	-	-	-	-
	12:21176814:A:G	chr12:21176814	G	ENSG00000134538	ENST00000256958	Transcript	missense_variant	502	398	133	E/G	gAa/gGa	-	MODERATE	-	1	-	SNV	SLCO1B1	HGNC	HGNC:10959	protein_coding	YES	NM_006446.5	-	1	P1	CCDS8685.1	ENSP00000256958	Q9Y6L6.181	A0A024RAU7.41	UPI0000043BED	-	-	1	tolerated(0.21)	benign(0.02)	2023-05-15	-	Low_complexity_(Seg):seg,PROSITE_profiles:PS50850,PANTHER:PTHR11388,PANTHER:PTHR11388:SF82,Pfam:PF03137,TIGRFAM:TIGR00805,Superfamily:SSF103473	-	ENST00000256958.3:c.398A>G	ENSP00000256958.2:p.Glu133Gly	-	-	-	-	-	-
	12:21176822:A:G	chr12:21176822	G	ENSG00000134538	ENST00000256958	Transcript	missense_variant	510	406	136	T/A	Aca/Gca	-	MODERATE	-	1	-	SNV	SLCO1B1	HGNC	HGNC:10959	protein_coding	YES	NM_006446.5	-	1	P1	CCDS8685.1	ENSP00000256958	Q9Y6L6.181	A0A024RAU7.41	UPI0000043BED	-	-	1	deleterious(0.01)	possibly_damaging(0.734)	2023-05-15	-	Low_complexity_(Seg):seg,PROSITE_profiles:PS50850,PANTHER:PTHR11388,PANTHER:PTHR11388:SF82,Pfam:PF03137,TIGRFAM:TIGR00805,Superfamily:SSF103473	-	ENST00000256958.3:c.406A>G	ENSP00000256958.2:p.Thr136Ala	-	-	-	-	-	-
	12:21176824:A:G	chr12:21176824	G	ENSG00000134538	ENST00000256958	Transcript	synonymous_variant	512	408	136	T	acA/acG	rs752011897	LOW	-	1	-	SNV	SLCO1B1	HGNC	HGNC:10959	protein_coding	YES	NM_006446.5	-	1	P1	CCDS8685.1	ENSP00000256958	Q9Y6L6.181	A0A024RAU7.41	UPI0000043BED	-	-	1	-	-	2023-05-15	-	Low_complexity_(Seg):seg,PROSITE_profiles:PS50850,PANTHER:PTHR11388,PANTHER:PTHR11388:SF82,Pfam:PF03137,TIGRFAM:TIGR00805,Superfamily:SSF103473	-	ENST00000256958.3:c.408A>G	ENSP00000256958.2:p.Thr136%3D	-	-	-	-	-	-
	12:21176825:T:C	chr12:21176825	C	ENSG00000134538	ENST00000256958	Transcript	missense_variant	513	409	137	S/P	Tcg/Ccg	rs1202577583	MODERATE	-	1	-	SNV	SLCO1B1	HGNC	HGNC:10959	protein_coding	YES	NM_006446.5	-	1	P1	CCDS8685.1	ENSP00000256958	Q9Y6L6.181	A0A024RAU7.41	UPI0000043BED	-	-	1	tolerated(0.11)	benign(0.179)	2023-05-15	-	Low_complexity_(Seg):seg,PROSITE_profiles:PS50850,PANTHER:PTHR11388,PANTHER:PTHR11388:SF82,Pfam:PF03137,TIGRFAM:TIGR00805,Superfamily:SSF103473	-	ENST00000256958.3:c.409T>C	ENSP00000256958.2:p.Ser137Pro	-	-	-	-	-	-
	12:21176826:C:T	chr12:21176826	T	ENSG00000134538	ENST00000256958	Transcript	missense_variant	514	410	137	S/L	tCg/tTg	rs151204465,COSV57009742	MODERATE	-	1	-	SNV	SLCO1B1	HGNC	HGNC:10959	protein_coding	YES	NM_006446.5	-	1	P1	CCDS8685.1	ENSP00000256958	Q9Y6L6.181	A0A024RAU7.41	UPI0000043BED	-	-	1	tolerated(0.36)	benign(0.142)	2023-05-15	-	Low_complexity_(Seg):seg,PROSITE_profiles:PS50850,PANTHER:PTHR11388,PANTHER:PTHR11388:SF82,Pfam:PF03137,TIGRFAM:TIGR00805,Superfamily:SSF103473	-	ENST00000256958.3:c.410C>T	ENSP00000256958.2:p.Ser137Leu	-	0	0	0	0	0
	12:21176827:G:A	chr12:21176827	A	ENSG00000134538	ENST00000256958	Transcript	synonymous_variant	515	411	137	S	tcG/tcA	rs11045818	LOW	-	1	-	SNV	SLCO1B1	HGNC	HGNC:10959	protein_coding	YES	NM_006446.5	-	1	P1	CCDS8685.1	ENSP00000256958	Q9Y6L6.181	A0A024RAU7.41	UPI0000043BED	-	-	1	-	-	2023-05-15	-	Low_complexity_(Seg):seg,PROSITE_profiles:PS50850,PANTHER:PTHR11388,PANTHER:PTHR11388:SF82,Pfam:PF03137,TIGRFAM:TIGR00805,Superfamily:SSF103473	-	ENST00000256958.3:c.411G>A	ENSP00000256958.2:p.Ser137%3D	-	0.0517	0.0136	0.0893	0.003	0.1441
	12:21176828:A:G	chr12:21176828	G	ENSG00000134538	ENST00000256958	Transcript	missense_variant	516	412	138	T/A	Acc/Gcc	-	MODERATE	-	1	-	SNV	SLCO1B1	HGNC	HGNC:10959	protein_coding	YES	NM_006446.5	-	1	P1	CCDS8685.1	ENSP00000256958	Q9Y6L6.181	A0A024RAU7.41	UPI0000043BED	-	-	1	tolerated(0.07)	benign(0.026)	2023-05-15	-	Low_complexity_(Seg):seg,PROSITE_profiles:PS50850,PANTHER:PTHR11388,PANTHER:PTHR11388:SF82,Pfam:PF03137,TIGRFAM:TIGR00805,Superfamily:SSF103473	-	ENST00000256958.3:c.412A>G	ENSP00000256958.2:p.Thr138Ala	-	-	-	-	-	-
	12:21176830:C:T	chr12:21176830	T	ENSG00000134538	ENST00000256958	Transcript	synonymous_variant	518	414	138	T	acC/acT	rs924027783	LOW	-	1	-	SNV	SLCO1B1	HGNC	HGNC:10959	protein_coding	YES	NM_006446.5	-	1	P1	CCDS8685.1	ENSP00000256958	Q9Y6L6.181	A0A024RAU7.41	UPI0000043BED	-	-	1	-	-	2023-05-15	-	Low_complexity_(Seg):seg,PROSITE_profiles:PS50850,PANTHER:PTHR11388,PANTHER:PTHR11388:SF82,Pfam:PF03137,TIGRFAM:TIGR00805,Superfamily:SSF103473	-	ENST00000256958.3:c.414C>T	ENSP00000256958.2:p.Thr138%3D	-	-	-	-	-	-
	12:21176832:T:C	chr12:21176832	C	ENSG00000134538	ENST00000256958	Transcript	missense_variant	520	416	139	L/S	tTa/tCa	-	MODERATE	-	1	-	SNV	SLCO1B1	HGNC	HGNC:10959	protein_coding	YES	NM_006446.5	-	1	P1	CCDS8685.1	ENSP00000256958	Q9Y6L6.181	A0A024RAU7.41	UPI0000043BED	-	-	1	deleterious(0)	benign(0.098)	2023-05-15	-	Low_complexity_(Seg):seg,PROSITE_profiles:PS50850,PANTHER:PTHR11388,PANTHER:PTHR11388:SF82,Pfam:PF03137,TIGRFAM:TIGR00805,Superfamily:SSF103473	-	ENST00000256958.3:c.416T>C	ENSP00000256958.2:p.Leu139Ser	-	-	-	-	-	-
	12:21176835:C:T	chr12:21176835	T	ENSG00000134538	ENST00000256958	Transcript	missense_variant	523	419	140	S/F	tCc/tTc	rs147450830,COSV57006832	MODERATE	-	1	-	SNV	SLCO1B1	HGNC	HGNC:10959	protein_coding	YES	NM_006446.5	-	1	P1	CCDS8685.1	ENSP00000256958	Q9Y6L6.181	A0A024RAU7.41	UPI0000043BED	-	-	1	deleterious(0.01)	benign(0.088)	2023-05-15	-	Low_complexity_(Seg):seg,PROSITE_profiles:PS50850,PANTHER:PTHR11388,PANTHER:PTHR11388:SF82,Pfam:PF03137,TIGRFAM:TIGR00805,Superfamily:SSF103473	-	ENST00000256958.3:c.419C>T	ENSP00000256958.2:p.Ser140Phe	-	-	-	-	-	-
	12:21176836:C:T	chr12:21176836	T	ENSG00000134538	ENST00000256958	Transcript	synonymous_variant	524	420	140	S	tcC/tcT	COSV57011428	LOW	-	1	-	SNV	SLCO1B1	HGNC	HGNC:10959	protein_coding	YES	NM_006446.5	-	1	P1	CCDS8685.1	ENSP00000256958	Q9Y6L6.181	A0A024RAU7.41	UPI0000043BED	-	-	1	-	-	2023-05-15	-	Low_complexity_(Seg):seg,PROSITE_profiles:PS50850,PANTHER:PTHR11388,PANTHER:PTHR11388:SF82,Pfam:PF03137,TIGRFAM:TIGR00805,Superfamily:SSF103473	-	ENST00000256958.3:c.420C>T	ENSP00000256958.2:p.Ser140%3D	-	-	-	-	-	-
	12:21176840:T:G	chr12:21176840	G	ENSG00000134538	ENST00000256958	Transcript	missense_variant	528	424	142	C/G	Tgt/Ggt	-	MODERATE	-	1	-	SNV	SLCO1B1	HGNC	HGNC:10959	protein_coding	YES	NM_006446.5	-	1	P1	CCDS8685.1	ENSP00000256958	Q9Y6L6.181	A0A024RAU7.41	UPI0000043BED	-	-	1	deleterious(0)	probably_damaging(1)	2023-05-15	-	PROSITE_profiles:PS50850,PANTHER:PTHR11388,PANTHER:PTHR11388:SF82,Pfam:PF03137,TIGRFAM:TIGR00805,Superfamily:SSF103473	-	ENST00000256958.3:c.424T>G	ENSP00000256958.2:p.Cys142Gly	-	-	-	-	-	-
	12:21176842:TTTAA:T	chr12:21176843-21176846	-	ENSG00000134538	ENST00000256958	Transcript	frameshift_variant	531-534	427-430	143-144	LI/X	TTAAtt/tt	-	HIGH	-	1	-	deletion	SLCO1B1	HGNC	HGNC:10959	protein_coding	YES	NM_006446.5	-	1	P1	CCDS8685.1	ENSP00000256958	Q9Y6L6.181	A0A024RAU7.41	UPI0000043BED	-	-	1	-	-	2023-05-15	-	PROSITE_profiles:PS50850,PANTHER:PTHR11388,PANTHER:PTHR11388:SF82,Pfam:PF03137,TIGRFAM:TIGR00805,Superfamily:SSF103473	-	ENST00000256958.3:c.432_435del	ENSP00000256958.2:p.Asn145LysfsTer12	5	-	-	-	-	-
	12:21176843:T:C	chr12:21176843	C	ENSG00000134538	ENST00000256958	Transcript	synonymous_variant	531	427	143	L	Tta/Cta	-	LOW	-	1	-	SNV	SLCO1B1	HGNC	HGNC:10959	protein_coding	YES	NM_006446.5	-	1	P1	CCDS8685.1	ENSP00000256958	Q9Y6L6.181	A0A024RAU7.41	UPI0000043BED	-	-	1	-	-	2023-05-15	-	PROSITE_profiles:PS50850,PANTHER:PTHR11388,PANTHER:PTHR11388:SF82,Pfam:PF03137,TIGRFAM:TIGR00805,Superfamily:SSF103473	-	ENST00000256958.3:c.427T>C	ENSP00000256958.2:p.Leu143%3D	-	-	-	-	-	-
	12:21176845:A:T	chr12:21176845	T	ENSG00000134538	ENST00000256958	Transcript	missense_variant	533	429	143	L/F	ttA/ttT	-	MODERATE	-	1	-	SNV	SLCO1B1	HGNC	HGNC:10959	protein_coding	YES	NM_006446.5	-	1	P1	CCDS8685.1	ENSP00000256958	Q9Y6L6.181	A0A024RAU7.41	UPI0000043BED	-	-	1	tolerated(0.21)	benign(0.111)	2023-05-15	-	PROSITE_profiles:PS50850,PANTHER:PTHR11388,PANTHER:PTHR11388:SF82,Pfam:PF03137,TIGRFAM:TIGR00805,Superfamily:SSF103473	-	ENST00000256958.3:c.429A>T	ENSP00000256958.2:p.Leu143Phe	-	-	-	-	-	-
	12:21176848:T:G	chr12:21176848	G	ENSG00000134538	ENST00000256958	Transcript	missense_variant	536	432	144	I/M	atT/atG	rs1299781634	MODERATE	-	1	-	SNV	SLCO1B1	HGNC	HGNC:10959	protein_coding	YES	NM_006446.5	-	1	P1	CCDS8685.1	ENSP00000256958	Q9Y6L6.181	A0A024RAU7.41	UPI0000043BED	-	-	1	tolerated(0.26)	benign(0.062)	2023-05-15	-	PROSITE_profiles:PS50850,PANTHER:PTHR11388,PANTHER:PTHR11388:SF82,Pfam:PF03137,TIGRFAM:TIGR00805,Superfamily:SSF103473	-	ENST00000256958.3:c.432T>G	ENSP00000256958.2:p.Ile144Met	-	-	-	-	-	-
	12:21176849:A:G	chr12:21176849	G	ENSG00000134538	ENST00000256958	Transcript	missense_variant	537	433	145	N/D	Aat/Gat	-	MODERATE	-	1	-	SNV	SLCO1B1	HGNC	HGNC:10959	protein_coding	YES	NM_006446.5	-	1	P1	CCDS8685.1	ENSP00000256958	Q9Y6L6.181	A0A024RAU7.41	UPI0000043BED	-	-	1	tolerated(0.61)	benign(0.029)	2023-05-15	-	PROSITE_profiles:PS50850,PANTHER:PTHR11388,PANTHER:PTHR11388:SF82,Pfam:PF03137,TIGRFAM:TIGR00805,Superfamily:SSF103473	-	ENST00000256958.3:c.433A>G	ENSP00000256958.2:p.Asn145Asp	-	-	-	-	-	-
	12:21176851:T:C	chr12:21176851	C	ENSG00000134538	ENST00000256958	Transcript	synonymous_variant	539	435	145	N	aaT/aaC	-	LOW	-	1	-	SNV	SLCO1B1	HGNC	HGNC:10959	protein_coding	YES	NM_006446.5	-	1	P1	CCDS8685.1	ENSP00000256958	Q9Y6L6.181	A0A024RAU7.41	UPI0000043BED	-	-	1	-	-	2023-05-15	-	PROSITE_profiles:PS50850,PANTHER:PTHR11388,PANTHER:PTHR11388:SF82,Pfam:PF03137,TIGRFAM:TIGR00805,Superfamily:SSF103473	-	ENST00000256958.3:c.435T>C	ENSP00000256958.2:p.Asn145%3D	-	-	-	-	-	-
	12:21176854:A:G	chr12:21176854	G	ENSG00000134538	ENST00000256958	Transcript	synonymous_variant	542	438	146	Q	caA/caG	-	LOW	-	1	-	SNV	SLCO1B1	HGNC	HGNC:10959	protein_coding	YES	NM_006446.5	-	1	P1	CCDS8685.1	ENSP00000256958	Q9Y6L6.181	A0A024RAU7.41	UPI0000043BED	-	-	1	-	-	2023-05-15	-	PROSITE_profiles:PS50850,PANTHER:PTHR11388,PANTHER:PTHR11388:SF82,Pfam:PF03137,TIGRFAM:TIGR00805,Superfamily:SSF103473	-	ENST00000256958.3:c.438A>G	ENSP00000256958.2:p.Gln146%3D	-	-	-	-	-	-
	12:21176856:T:C	chr12:21176856	C	ENSG00000134538	ENST00000256958	Transcript	missense_variant	544	440	147	I/T	aTt/aCt	rs764708597	MODERATE	-	1	-	SNV	SLCO1B1	HGNC	HGNC:10959	protein_coding	YES	NM_006446.5	-	1	P1	CCDS8685.1	ENSP00000256958	Q9Y6L6.181	A0A024RAU7.41	UPI0000043BED	-	-	1	tolerated(1)	benign(0)	2023-05-15	-	PROSITE_profiles:PS50850,PANTHER:PTHR11388,PANTHER:PTHR11388:SF82,Pfam:PF03137,TIGRFAM:TIGR00805,Superfamily:SSF103473	-	ENST00000256958.3:c.440T>C	ENSP00000256958.2:p.Ile147Thr	-	-	-	-	-	-
	12:21176859:T:C	chr12:21176859	C	ENSG00000134538	ENST00000256958	Transcript	missense_variant	547	443	148	L/S	tTa/tCa	rs553054459	MODERATE	-	1	-	SNV	SLCO1B1	HGNC	HGNC:10959	protein_coding	YES	NM_006446.5	-	1	P1	CCDS8685.1	ENSP00000256958	Q9Y6L6.181	A0A024RAU7.41	UPI0000043BED	-	-	1	tolerated(0.49)	benign(0.015)	2023-05-15	-	PROSITE_profiles:PS50850,PANTHER:PTHR11388,PANTHER:PTHR11388:SF82,Pfam:PF03137,TIGRFAM:TIGR00805,Superfamily:SSF103473	-	ENST00000256958.3:c.443T>C	ENSP00000256958.2:p.Leu148Ser	-	-	-	-	-	-
	12:21176863:A:G	chr12:21176863	G	ENSG00000134538	ENST00000256958	Transcript	synonymous_variant	551	447	149	S	tcA/tcG	-	LOW	-	1	-	SNV	SLCO1B1	HGNC	HGNC:10959	protein_coding	YES	NM_006446.5	-	1	P1	CCDS8685.1	ENSP00000256958	Q9Y6L6.181	A0A024RAU7.41	UPI0000043BED	-	-	1	-	-	2023-05-15	-	PROSITE_profiles:PS50850,PANTHER:PTHR11388,PANTHER:PTHR11388:SF82,Pfam:PF03137,TIGRFAM:TIGR00805,Superfamily:SSF103473	-	ENST00000256958.3:c.447A>G	ENSP00000256958.2:p.Ser149%3D	-	-	-	-	-	-
	12:21176866:C:T	chr12:21176866	T	ENSG00000134538	ENST00000256958	Transcript	synonymous_variant	554	450	150	L	ctC/ctT	COSV57006458	LOW	-	1	-	SNV	SLCO1B1	HGNC	HGNC:10959	protein_coding	YES	NM_006446.5	-	1	P1	CCDS8685.1	ENSP00000256958	Q9Y6L6.181	A0A024RAU7.41	UPI0000043BED	-	-	1	-	-	2023-05-15	-	PROSITE_profiles:PS50850,PANTHER:PTHR11388,PANTHER:PTHR11388:SF82,Pfam:PF03137,TIGRFAM:TIGR00805,Superfamily:SSF103473	-	ENST00000256958.3:c.450C>T	ENSP00000256958.2:p.Leu150%3D	-	-	-	-	-	-
	12:21176868:A:G	chr12:21176868	G	ENSG00000134538	ENST00000256958	Transcript	missense_variant	556	452	151	N/S	aAt/aGt	rs2306282,COSV57008672	MODERATE	-	1	-	SNV	SLCO1B1	HGNC	HGNC:10959	protein_coding	YES	NM_006446.5	-	1	P1	CCDS8685.1	ENSP00000256958	Q9Y6L6.181	A0A024RAU7.41	UPI0000043BED	-	-	1	tolerated(0.11)	benign(0.062)	2023-05-15	-	PROSITE_profiles:PS50850,PANTHER:PTHR11388,PANTHER:PTHR11388:SF82,Pfam:PF03137,TIGRFAM:TIGR00805,Superfamily:SSF103473	-	ENST00000256958.3:c.452A>G	ENSP00000256958.2:p.Asn151Ser	-	0.0008	0	0	0.004	0
	12:21176871:G:C	chr12:21176871	C	ENSG00000134538	ENST00000256958	Transcript	missense_variant	559	455	152	R/T	aGa/aCa	rs145144129,CM087801	MODERATE	-	1	-	SNV	SLCO1B1	HGNC	HGNC:10959	protein_coding	YES	NM_006446.5	-	1	P1	CCDS8685.1	ENSP00000256958	Q9Y6L6.181	A0A024RAU7.41	UPI0000043BED	-	-	1	tolerated(0.51)	benign(0.014)	2023-05-15	-	PROSITE_profiles:PS50850,PANTHER:PTHR11388,PANTHER:PTHR11388:SF82,Pfam:PF03137,TIGRFAM:TIGR00805,Superfamily:SSF103473	-	ENST00000256958.3:c.455G>C	ENSP00000256958.2:p.Arg152Thr	-	0.0004	0.0015	0	0	0
	12:21176872:A:C	chr12:21176872	C	ENSG00000134538	ENST00000256958	Transcript	missense_variant	560	456	152	R/S	agA/agC	-	MODERATE	-	1	-	SNV	SLCO1B1	HGNC	HGNC:10959	protein_coding	YES	NM_006446.5	-	1	P1	CCDS8685.1	ENSP00000256958	Q9Y6L6.181	A0A024RAU7.41	UPI0000043BED	-	-	1	tolerated(0.57)	benign(0.012)	2023-05-15	-	PROSITE_profiles:PS50850,PANTHER:PTHR11388,PANTHER:PTHR11388:SF82,Pfam:PF03137,TIGRFAM:TIGR00805,Superfamily:SSF103473	-	ENST00000256958.3:c.456A>C	ENSP00000256958.2:p.Arg152Ser	-	-	-	-	-	-
	12:21176872:A:G	chr12:21176872	G	ENSG00000134538	ENST00000256958	Transcript	synonymous_variant	560	456	152	R	agA/agG	rs757005671	LOW	-	1	-	SNV	SLCO1B1	HGNC	HGNC:10959	protein_coding	YES	NM_006446.5	-	1	P1	CCDS8685.1	ENSP00000256958	Q9Y6L6.181	A0A024RAU7.41	UPI0000043BED	-	-	1	-	-	2023-05-15	-	PROSITE_profiles:PS50850,PANTHER:PTHR11388,PANTHER:PTHR11388:SF82,Pfam:PF03137,TIGRFAM:TIGR00805,Superfamily:SSF103473	-	ENST00000256958.3:c.456A>G	ENSP00000256958.2:p.Arg152%3D	-	-	-	-	-	-
	12:21176873:G:A	chr12:21176873	A	ENSG00000134538	ENST00000256958	Transcript	missense_variant	561	457	153	A/T	Gca/Aca	COSV104376739,COSV57008262	MODERATE	-	1	-	SNV	SLCO1B1	HGNC	HGNC:10959	protein_coding	YES	NM_006446.5	-	1	P1	CCDS8685.1	ENSP00000256958	Q9Y6L6.181	A0A024RAU7.41	UPI0000043BED	-	-	1	tolerated(1)	benign(0)	2023-05-15	-	PROSITE_profiles:PS50850,PANTHER:PTHR11388,PANTHER:PTHR11388:SF82,Pfam:PF03137,TIGRFAM:TIGR00805,Superfamily:SSF103473	-	ENST00000256958.3:c.457G>A	ENSP00000256958.2:p.Ala153Thr	-	-	-	-	-	-
	12:21176879:C:A	chr12:21176879	A	ENSG00000134538	ENST00000256958	Transcript	missense_variant	567	463	155	P/T	Cct/Act	rs11045819,CM086596	MODERATE	-	1	-	SNV	SLCO1B1	HGNC	HGNC:10959	protein_coding	YES	NM_006446.5	-	1	P1	CCDS8685.1	ENSP00000256958	Q9Y6L6.181	A0A024RAU7.41	UPI0000043BED	-	-	1	tolerated(0.59)	benign(0.01)	2023-05-15	-	PROSITE_profiles:PS50850,PANTHER:PTHR11388,PANTHER:PTHR11388:SF82,Pfam:PF03137,TIGRFAM:TIGR00805,Superfamily:SSF103473	-	ENST00000256958.3:c.463C>A	ENSP00000256958.2:p.Pro155Thr	-	0.0649	0.0598	0.0994	0.003	0.1441
	12:21176879:C:G	chr12:21176879	G	ENSG00000134538	ENST00000256958	Transcript	missense_variant	567	463	155	P/A	Cct/Gct	CM086596	MODERATE	-	1	-	SNV	SLCO1B1	HGNC	HGNC:10959	protein_coding	YES	NM_006446.5	-	1	P1	CCDS8685.1	ENSP00000256958	Q9Y6L6.181	A0A024RAU7.41	UPI0000043BED	-	-	1	tolerated(0.27)	benign(0.01)	2023-05-15	-	PROSITE_profiles:PS50850,PANTHER:PTHR11388,PANTHER:PTHR11388:SF82,Pfam:PF03137,TIGRFAM:TIGR00805,Superfamily:SSF103473	-	ENST00000256958.3:c.463C>G	ENSP00000256958.2:p.Pro155Ala	-	-	-	-	-	-
	12:21176880:C:T	chr12:21176880	T	ENSG00000134538	ENST00000256958	Transcript	missense_variant	568	464	155	P/L	cCt/cTt	rs1393757524,COSV99918256	MODERATE	-	1	-	SNV	SLCO1B1	HGNC	HGNC:10959	protein_coding	YES	NM_006446.5	-	1	P1	CCDS8685.1	ENSP00000256958	Q9Y6L6.181	A0A024RAU7.41	UPI0000043BED	-	-	1	tolerated(0.55)	benign(0.012)	2023-05-15	-	PROSITE_profiles:PS50850,PANTHER:PTHR11388,PANTHER:PTHR11388:SF82,Pfam:PF03137,TIGRFAM:TIGR00805,Superfamily:SSF103473	-	ENST00000256958.3:c.464C>T	ENSP00000256958.2:p.Pro155Leu	-	-	-	-	-	-
	12:21176883:A:C	chr12:21176883	C	ENSG00000134538	ENST00000256958	Transcript	missense_variant	571	467	156	E/A	gAg/gCg	CM087802,COSV57011647	MODERATE	-	1	-	SNV	SLCO1B1	HGNC	HGNC:10959	protein_coding	YES	NM_006446.5	-	1	P1	CCDS8685.1	ENSP00000256958	Q9Y6L6.181	A0A024RAU7.41	UPI0000043BED	-	-	1	tolerated(0.1)	benign(0.036)	2023-05-15	-	PROSITE_profiles:PS50850,PANTHER:PTHR11388,PANTHER:PTHR11388:SF82,Pfam:PF03137,TIGRFAM:TIGR00805,Superfamily:SSF103473	-	ENST00000256958.3:c.467A>C	ENSP00000256958.2:p.Glu156Ala	-	-	-	-	-	-
	12:21176890:G:A	chr12:21176890	A	ENSG00000134538	ENST00000256958	Transcript	synonymous_variant	578	474	158	V	gtG/gtA	rs140730264	LOW	-	1	-	SNV	SLCO1B1	HGNC	HGNC:10959	protein_coding	YES	NM_006446.5	-	1	P1	CCDS8685.1	ENSP00000256958	Q9Y6L6.181	A0A024RAU7.41	UPI0000043BED	-	-	1	-	-	2023-05-15	-	PROSITE_profiles:PS50850,PANTHER:PTHR11388,PANTHER:PTHR11388:SF82,Pfam:PF03137,TIGRFAM:TIGR00805,Superfamily:SSF103473	-	ENST00000256958.3:c.474G>A	ENSP00000256958.2:p.Val158%3D	-	0.0006	0.0023	0	0	0
	12:21176891:G:C	chr12:21176891	C	ENSG00000134538	ENST00000256958	Transcript	missense_variant	579	475	159	G/R	Gga/Cga	-	MODERATE	-	1	-	SNV	SLCO1B1	HGNC	HGNC:10959	protein_coding	YES	NM_006446.5	-	1	P1	CCDS8685.1	ENSP00000256958	Q9Y6L6.181	A0A024RAU7.41	UPI0000043BED	-	-	1	tolerated(0.38)	benign(0.035)	2023-05-15	-	PROSITE_profiles:PS50850,PANTHER:PTHR11388,PANTHER:PTHR11388:SF82,Pfam:PF03137,TIGRFAM:TIGR00805,Superfamily:SSF103473	-	ENST00000256958.3:c.475G>C	ENSP00000256958.2:p.Gly159Arg	-	-	-	-	-	-
	12:21176892:G:A	chr12:21176892	A	ENSG00000134538	ENST00000256958	Transcript	missense_variant	580	476	159	G/E	gGa/gAa	COSV57007455	MODERATE	-	1	-	SNV	SLCO1B1	HGNC	HGNC:10959	protein_coding	YES	NM_006446.5	-	1	P1	CCDS8685.1	ENSP00000256958	Q9Y6L6.181	A0A024RAU7.41	UPI0000043BED	-	-	1	tolerated(1)	benign(0.003)	2023-05-15	-	PROSITE_profiles:PS50850,PANTHER:PTHR11388,PANTHER:PTHR11388:SF82,Pfam:PF03137,TIGRFAM:TIGR00805,Superfamily:SSF103473	-	ENST00000256958.3:c.476G>A	ENSP00000256958.2:p.Gly159Glu	-	-	-	-	-	-
	12:21176898:G:A	chr12:21176898	A	ENSG00000134538	ENST00000256958	Transcript	splice_donor_variant	-	-	-	-	-	CS120776	HIGH	-	1	-	SNV	SLCO1B1	HGNC	HGNC:10959	protein_coding	YES	NM_006446.5	-	1	P1	CCDS8685.1	ENSP00000256958	Q9Y6L6.181	A0A024RAU7.41	UPI0000043BED	-	-	1	-	-	-	2023-05-14	-	-	ENST00000256958.3:c.481+1G>A	-	-	-	-	-	-	-
	12:21176898:G:T	chr12:21176898	T	ENSG00000134538	ENST00000256958	Transcript	splice_donor_variant	-	-	-	-	-	rs77271279,CS120776	HIGH	-	1	-	SNV	SLCO1B1	HGNC	HGNC:10959	protein_coding	YES	NM_006446.5	-	1	P1	CCDS8685.1	ENSP00000256958	Q9Y6L6.181	A0A024RAU7.41	UPI0000043BED	-	-	1	-	-	-	2023-05-14	-	-	ENST00000256958.3:c.481+1G>T	-	-	0.0092	0.034	0.0014	0	0
	12:21176904:A:G	chr12:21176904	G	ENSG00000134538	ENST00000256958	Transcript	splice_region_variant,intron_variant	-	-	-	-	-	rs774953537	LOW	-	1	-	SNV	SLCO1B1	HGNC	HGNC:10959	protein_coding	YES	NM_006446.5	-	1	P1	CCDS8685.1	ENSP00000256958	Q9Y6L6.181	A0A024RAU7.41	UPI0000043BED	-	-	1	-	-	-	2023-05-14	-	-	ENST00000256958.3:c.481+7A>G	-	-	-	-	-	-	-
	12:21176907:A:T	chr12:21176907	T	ENSG00000134538	ENST00000256958	Transcript	intron_variant	-	-	-	-	-	-	MODIFIER	-	1	-	SNV	SLCO1B1	HGNC	HGNC:10959	protein_coding	YES	NM_006446.5	-	1	P1	CCDS8685.1	ENSP00000256958	Q9Y6L6.181	A0A024RAU7.41	UPI0000043BED	-	-	1	-	-	-	2023-05-14	-	-	ENST00000256958.3:c.481+10A>T	-	-	-	-	-	-	-
	12:21176909:T:C	chr12:21176909	C	ENSG00000134538	ENST00000256958	Transcript	intron_variant	-	-	-	-	-	-	MODIFIER	-	1	-	SNV	SLCO1B1	HGNC	HGNC:10959	protein_coding	YES	NM_006446.5	-	1	P1	CCDS8685.1	ENSP00000256958	Q9Y6L6.181	A0A024RAU7.41	UPI0000043BED	-	-	1	-	-	-	2023-05-14	-	-	ENST00000256958.3:c.481+12T>C	-	-	-	-	-	-	-
	12:21176910:A:G	chr12:21176910	G	ENSG00000134538	ENST00000256958	Transcript	intron_variant	-	-	-	-	-	rs762304546	MODIFIER	-	1	-	SNV	SLCO1B1	HGNC	HGNC:10959	protein_coding	YES	NM_006446.5	-	1	P1	CCDS8685.1	ENSP00000256958	Q9Y6L6.181	A0A024RAU7.41	UPI0000043BED	-	-	1	-	-	-	2023-05-14	-	-	ENST00000256958.3:c.481+13A>G	-	-	-	-	-	-	-
	12:21176910:A:T	chr12:21176910	T	ENSG00000134538	ENST00000256958	Transcript	intron_variant	-	-	-	-	-	-	MODIFIER	-	1	-	SNV	SLCO1B1	HGNC	HGNC:10959	protein_coding	YES	NM_006446.5	-	1	P1	CCDS8685.1	ENSP00000256958	Q9Y6L6.181	A0A024RAU7.41	UPI0000043BED	-	-	1	-	-	-	2023-05-14	-	-	ENST00000256958.3:c.481+13A>T	-	-	-	-	-	-	-
	12:21176911:T:C	chr12:21176911	C	ENSG00000134538	ENST00000256958	Transcript	intron_variant	-	-	-	-	-	rs1207579755	MODIFIER	-	1	-	SNV	SLCO1B1	HGNC	HGNC:10959	protein_coding	YES	NM_006446.5	-	1	P1	CCDS8685.1	ENSP00000256958	Q9Y6L6.181	A0A024RAU7.41	UPI0000043BED	-	-	1	-	-	-	2023-05-14	-	-	ENST00000256958.3:c.481+14T>C	-	-	-	-	-	-	-
	12:21176915:C:T	chr12:21176915	T	ENSG00000134538	ENST00000256958	Transcript	intron_variant	-	-	-	-	-	-	MODIFIER	-	1	-	SNV	SLCO1B1	HGNC	HGNC:10959	protein_coding	YES	NM_006446.5	-	1	P1	CCDS8685.1	ENSP00000256958	Q9Y6L6.181	A0A024RAU7.41	UPI0000043BED	-	-	1	-	-	-	2023-05-14	-	-	ENST00000256958.3:c.481+18C>T	-	-	-	-	-	-	-
	12:21176918:T:C	chr12:21176918	C	ENSG00000134538	ENST00000256958	Transcript	intron_variant	-	-	-	-	-	-	MODIFIER	-	1	-	SNV	SLCO1B1	HGNC	HGNC:10959	protein_coding	YES	NM_006446.5	-	1	P1	CCDS8685.1	ENSP00000256958	Q9Y6L6.181	A0A024RAU7.41	UPI0000043BED	-	-	1	-	-	-	2023-05-14	-	-	ENST00000256958.3:c.481+21T>C	-	-	-	-	-	-	-
	12:21176918:TA:T	chr12:21176919	-	ENSG00000134538	ENST00000256958	Transcript	intron_variant	-	-	-	-	-	-	MODIFIER	-	1	-	deletion	SLCO1B1	HGNC	HGNC:10959	protein_coding	YES	NM_006446.5	-	1	P1	CCDS8685.1	ENSP00000256958	Q9Y6L6.181	A0A024RAU7.41	UPI0000043BED	-	-	1	-	-	-	2023-05-14	-	-	ENST00000256958.3:c.481+26del	-	-	-	-	-	-	-
	12:21176923:A:G	chr12:21176923	G	ENSG00000134538	ENST00000256958	Transcript	intron_variant	-	-	-	-	-	-	MODIFIER	-	1	-	SNV	SLCO1B1	HGNC	HGNC:10959	protein_coding	YES	NM_006446.5	-	1	P1	CCDS8685.1	ENSP00000256958	Q9Y6L6.181	A0A024RAU7.41	UPI0000043BED	-	-	1	-	-	-	2023-05-14	-	-	ENST00000256958.3:c.481+26A>G	-	-	-	-	-	-	-
	12:21176927:T:C	chr12:21176927	C	ENSG00000134538	ENST00000256958	Transcript	intron_variant	-	-	-	-	-	rs776362851	MODIFIER	-	1	-	SNV	SLCO1B1	HGNC	HGNC:10959	protein_coding	YES	NM_006446.5	-	1	P1	CCDS8685.1	ENSP00000256958	Q9Y6L6.181	A0A024RAU7.41	UPI0000043BED	-	-	1	-	-	-	2023-05-14	-	-	ENST00000256958.3:c.481+30T>C	-	-	-	-	-	-	-
	12:21176930:T:C	chr12:21176930	C	ENSG00000134538	ENST00000256958	Transcript	intron_variant	-	-	-	-	-	rs759174951	MODIFIER	-	1	-	SNV	SLCO1B1	HGNC	HGNC:10959	protein_coding	YES	NM_006446.5	-	1	P1	CCDS8685.1	ENSP00000256958	Q9Y6L6.181	A0A024RAU7.41	UPI0000043BED	-	-	1	-	-	-	2023-05-14	-	-	ENST00000256958.3:c.481+33T>C	-	-	-	-	-	-	-
	12:21176931:A:G	chr12:21176931	G	ENSG00000134538	ENST00000256958	Transcript	intron_variant	-	-	-	-	-	rs764909458	MODIFIER	-	1	-	SNV	SLCO1B1	HGNC	HGNC:10959	protein_coding	YES	NM_006446.5	-	1	P1	CCDS8685.1	ENSP00000256958	Q9Y6L6.181	A0A024RAU7.41	UPI0000043BED	-	-	1	-	-	-	2023-05-14	-	-	ENST00000256958.3:c.481+34A>G	-	-	-	-	-	-	-
	12:21176934:A:G	chr12:21176934	G	ENSG00000134538	ENST00000256958	Transcript	intron_variant	-	-	-	-	-	-	MODIFIER	-	1	-	SNV	SLCO1B1	HGNC	HGNC:10959	protein_coding	YES	NM_006446.5	-	1	P1	CCDS8685.1	ENSP00000256958	Q9Y6L6.181	A0A024RAU7.41	UPI0000043BED	-	-	1	-	-	-	2023-05-14	-	-	ENST00000256958.3:c.481+37A>G	-	-	-	-	-	-	-
	12:21176936:G:A	chr12:21176936	A	ENSG00000134538	ENST00000256958	Transcript	intron_variant	-	-	-	-	-	rs752194880	MODIFIER	-	1	-	SNV	SLCO1B1	HGNC	HGNC:10959	protein_coding	YES	NM_006446.5	-	1	P1	CCDS8685.1	ENSP00000256958	Q9Y6L6.181	A0A024RAU7.41	UPI0000043BED	-	-	1	-	-	-	2023-05-14	-	-	ENST00000256958.3:c.481+39G>A	-	-	-	-	-	-	-
	12:21176938:A:G	chr12:21176938	G	ENSG00000134538	ENST00000256958	Transcript	intron_variant	-	-	-	-	-	rs1456429613	MODIFIER	-	1	-	SNV	SLCO1B1	HGNC	HGNC:10959	protein_coding	YES	NM_006446.5	-	1	P1	CCDS8685.1	ENSP00000256958	Q9Y6L6.181	A0A024RAU7.41	UPI0000043BED	-	-	1	-	-	-	2023-05-14	-	-	ENST00000256958.3:c.481+41A>G	-	-	-	-	-	-	-
	12:21176952:A:G	chr12:21176952	G	ENSG00000134538	ENST00000256958	Transcript	intron_variant	-	-	-	-	-	rs1325975041	MODIFIER	-	1	-	SNV	SLCO1B1	HGNC	HGNC:10959	protein_coding	YES	NM_006446.5	-	1	P1	CCDS8685.1	ENSP00000256958	Q9Y6L6.181	A0A024RAU7.41	UPI0000043BED	-	-	1	-	-	-	2023-05-14	-	-	ENST00000256958.3:c.481+55A>G	-	-	-	-	-	-	-
	12:21176954:CT:C	chr12:21176955	-	ENSG00000134538	ENST00000256958	Transcript	intron_variant	-	-	-	-	-	-	MODIFIER	-	1	-	deletion	SLCO1B1	HGNC	HGNC:10959	protein_coding	YES	NM_006446.5	-	1	P1	CCDS8685.1	ENSP00000256958	Q9Y6L6.181	A0A024RAU7.41	UPI0000043BED	-	-	1	-	-	-	2023-05-14	-	-	ENST00000256958.3:c.481+58del	-	-	-	-	-	-	-
	12:21176956:C:G	chr12:21176956	G	ENSG00000134538	ENST00000256958	Transcript	intron_variant	-	-	-	-	-	-	MODIFIER	-	1	-	SNV	SLCO1B1	HGNC	HGNC:10959	protein_coding	YES	NM_006446.5	-	1	P1	CCDS8685.1	ENSP00000256958	Q9Y6L6.181	A0A024RAU7.41	UPI0000043BED	-	-	1	-	-	-	2023-05-14	-	-	ENST00000256958.3:c.481+59C>G	-	-	-	-	-	-	-
	12:21176956:C:T	chr12:21176956	T	ENSG00000134538	ENST00000256958	Transcript	intron_variant	-	-	-	-	-	-	MODIFIER	-	1	-	SNV	SLCO1B1	HGNC	HGNC:10959	protein_coding	YES	NM_006446.5	-	1	P1	CCDS8685.1	ENSP00000256958	Q9Y6L6.181	A0A024RAU7.41	UPI0000043BED	-	-	1	-	-	-	2023-05-14	-	-	ENST00000256958.3:c.481+59C>T	-	-	-	-	-	-	-
	12:21176958:A:C	chr12:21176958	C	ENSG00000134538	ENST00000256958	Transcript	intron_variant	-	-	-	-	-	-	MODIFIER	-	1	-	SNV	SLCO1B1	HGNC	HGNC:10959	protein_coding	YES	NM_006446.5	-	1	P1	CCDS8685.1	ENSP00000256958	Q9Y6L6.181	A0A024RAU7.41	UPI0000043BED	-	-	1	-	-	-	2023-05-14	-	-	ENST00000256958.3:c.481+61A>C	-	-	-	-	-	-	-
	12:21176962:A:G	chr12:21176962	G	ENSG00000134538	ENST00000256958	Transcript	intron_variant	-	-	-	-	-	-	MODIFIER	-	1	-	SNV	SLCO1B1	HGNC	HGNC:10959	protein_coding	YES	NM_006446.5	-	1	P1	CCDS8685.1	ENSP00000256958	Q9Y6L6.181	A0A024RAU7.41	UPI0000043BED	-	-	1	-	-	-	2023-05-14	-	-	ENST00000256958.3:c.481+65A>G	-	-	-	-	-	-	-
	12:21176962:ATTG:A	chr12:21176963-21176965	-	ENSG00000134538	ENST00000256958	Transcript	intron_variant	-	-	-	-	-	rs1375566490	MODIFIER	-	1	-	deletion	SLCO1B1	HGNC	HGNC:10959	protein_coding	YES	NM_006446.5	-	1	P1	CCDS8685.1	ENSP00000256958	Q9Y6L6.181	A0A024RAU7.41	UPI0000043BED	-	-	1	-	-	-	2023-05-14	-	-	ENST00000256958.3:c.481+70_481+72del	-	-	-	-	-	-	-
	12:21176963:T:C	chr12:21176963	C	ENSG00000134538	ENST00000256958	Transcript	intron_variant	-	-	-	-	-	-	MODIFIER	-	1	-	SNV	SLCO1B1	HGNC	HGNC:10959	protein_coding	YES	NM_006446.5	-	1	P1	CCDS8685.1	ENSP00000256958	Q9Y6L6.181	A0A024RAU7.41	UPI0000043BED	-	-	1	-	-	-	2023-05-14	-	-	ENST00000256958.3:c.481+66T>C	-	-	-	-	-	-	-
	12:21176968:G:A	chr12:21176968	A	ENSG00000134538	ENST00000256958	Transcript	intron_variant	-	-	-	-	-	-	MODIFIER	-	1	-	SNV	SLCO1B1	HGNC	HGNC:10959	protein_coding	YES	NM_006446.5	-	1	P1	CCDS8685.1	ENSP00000256958	Q9Y6L6.181	A0A024RAU7.41	UPI0000043BED	-	-	1	-	-	-	2023-05-14	-	-	ENST00000256958.3:c.481+71G>A	-	-	-	-	-	-	-
	12:21176970:G:A	chr12:21176970	A	ENSG00000134538	ENST00000256958	Transcript	intron_variant	-	-	-	-	-	-	MODIFIER	-	1	-	SNV	SLCO1B1	HGNC	HGNC:10959	protein_coding	YES	NM_006446.5	-	1	P1	CCDS8685.1	ENSP00000256958	Q9Y6L6.181	A0A024RAU7.41	UPI0000043BED	-	-	1	-	-	-	2023-05-14	-	-	ENST00000256958.3:c.481+73G>A	-	-	-	-	-	-	-
	12:21176976:C:A	chr12:21176976	A	ENSG00000134538	ENST00000256958	Transcript	intron_variant	-	-	-	-	-	-	MODIFIER	-	1	-	SNV	SLCO1B1	HGNC	HGNC:10959	protein_coding	YES	NM_006446.5	-	1	P1	CCDS8685.1	ENSP00000256958	Q9Y6L6.181	A0A024RAU7.41	UPI0000043BED	-	-	1	-	-	-	2023-05-14	-	-	ENST00000256958.3:c.481+79C>A	-	-	-	-	-	-	-
	12:21176979:T:C	chr12:21176979	C	ENSG00000134538	ENST00000256958	Transcript	intron_variant	-	-	-	-	-	-	MODIFIER	-	1	-	SNV	SLCO1B1	HGNC	HGNC:10959	protein_coding	YES	NM_006446.5	-	1	P1	CCDS8685.1	ENSP00000256958	Q9Y6L6.181	A0A024RAU7.41	UPI0000043BED	-	-	1	-	-	-	2023-05-14	-	-	ENST00000256958.3:c.481+82T>C	-	-	-	-	-	-	-
	12:21176979:T:G	chr12:21176979	G	ENSG00000134538	ENST00000256958	Transcript	intron_variant	-	-	-	-	-	rs185513638	MODIFIER	-	1	-	SNV	SLCO1B1	HGNC	HGNC:10959	protein_coding	YES	NM_006446.5	-	1	P1	CCDS8685.1	ENSP00000256958	Q9Y6L6.181	A0A024RAU7.41	UPI0000043BED	-	-	1	-	-	-	2023-05-14	-	-	ENST00000256958.3:c.481+82T>G	-	-	0.0008	0.003	0	0	0
	12:21176981:G:A	chr12:21176981	A	ENSG00000134538	ENST00000256958	Transcript	intron_variant	-	-	-	-	-	-	MODIFIER	-	1	-	SNV	SLCO1B1	HGNC	HGNC:10959	protein_coding	YES	NM_006446.5	-	1	P1	CCDS8685.1	ENSP00000256958	Q9Y6L6.181	A0A024RAU7.41	UPI0000043BED	-	-	1	-	-	-	2023-05-14	-	-	ENST00000256958.3:c.481+84G>A	-	-	-	-	-	-	-
	12:21176981:G:C	chr12:21176981	C	ENSG00000134538	ENST00000256958	Transcript	intron_variant	-	-	-	-	-	rs398088125	MODIFIER	-	1	-	SNV	SLCO1B1	HGNC	HGNC:10959	protein_coding	YES	NM_006446.5	-	1	P1	CCDS8685.1	ENSP00000256958	Q9Y6L6.181	A0A024RAU7.41	UPI0000043BED	-	-	1	-	-	-	2023-05-14	-	-	ENST00000256958.3:c.481+84G>C	-	-	0.0002	0	0	0	0
	12:21176987:TTTAA:T	chr12:21176988-21176991	-	ENSG00000134538	ENST00000256958	Transcript	intron_variant	-	-	-	-	-	-	MODIFIER	-	1	-	deletion	SLCO1B1	HGNC	HGNC:10959	protein_coding	YES	NM_006446.5	-	1	P1	CCDS8685.1	ENSP00000256958	Q9Y6L6.181	A0A024RAU7.41	UPI0000043BED	-	-	1	-	-	-	2023-05-14	-	-	ENST00000256958.3:c.481+95_481+98del	-	-	-	-	-	-	-
	12:21176991:A:T	chr12:21176991	T	ENSG00000134538	ENST00000256958	Transcript	intron_variant	-	-	-	-	-	-	MODIFIER	-	1	-	SNV	SLCO1B1	HGNC	HGNC:10959	protein_coding	YES	NM_006446.5	-	1	P1	CCDS8685.1	ENSP00000256958	Q9Y6L6.181	A0A024RAU7.41	UPI0000043BED	-	-	1	-	-	-	2023-05-14	-	-	ENST00000256958.3:c.481+94A>T	-	-	-	-	-	-	-
	12:21176993:T:A	chr12:21176993	A	ENSG00000134538	ENST00000256958	Transcript	intron_variant	-	-	-	-	-	-	MODIFIER	-	1	-	SNV	SLCO1B1	HGNC	HGNC:10959	protein_coding	YES	NM_006446.5	-	1	P1	CCDS8685.1	ENSP00000256958	Q9Y6L6.181	A0A024RAU7.41	UPI0000043BED	-	-	1	-	-	-	2023-05-14	-	-	ENST00000256958.3:c.481+96T>A	-	-	-	-	-	-	-
	12:21178479:A:C	chr12:21178479	C	ENSG00000134538	ENST00000256958	Transcript	intron_variant	-	-	-	-	-	-	MODIFIER	-	1	-	SNV	SLCO1B1	HGNC	HGNC:10959	protein_coding	YES	NM_006446.5	-	1	P1	CCDS8685.1	ENSP00000256958	Q9Y6L6.181	A0A024RAU7.41	UPI0000043BED	-	-	1	-	-	-	2023-05-14	-	-	ENST00000256958.3:c.482-97A>C	-	-	-	-	-	-	-
	12:21178482:AT:A	chr12:21178483	-	ENSG00000134538	ENST00000256958	Transcript	intron_variant	-	-	-	-	-	rs1440440689	MODIFIER	-	1	-	deletion	SLCO1B1	HGNC	HGNC:10959	protein_coding	YES	NM_006446.5	-	1	P1	CCDS8685.1	ENSP00000256958	Q9Y6L6.181	A0A024RAU7.41	UPI0000043BED	-	-	1	-	-	-	2023-05-14	-	-	ENST00000256958.3:c.482-93del	-	-	-	-	-	-	-
	12:21178483:T:A	chr12:21178483	A	ENSG00000134538	ENST00000256958	Transcript	intron_variant	-	-	-	-	-	rs1296842084	MODIFIER	-	1	-	SNV	SLCO1B1	HGNC	HGNC:10959	protein_coding	YES	NM_006446.5	-	1	P1	CCDS8685.1	ENSP00000256958	Q9Y6L6.181	A0A024RAU7.41	UPI0000043BED	-	-	1	-	-	-	2023-05-14	-	-	ENST00000256958.3:c.482-93T>A	-	-	-	-	-	-	-
	12:21178483:T:G	chr12:21178483	G	ENSG00000134538	ENST00000256958	Transcript	intron_variant	-	-	-	-	-	-	MODIFIER	-	1	-	SNV	SLCO1B1	HGNC	HGNC:10959	protein_coding	YES	NM_006446.5	-	1	P1	CCDS8685.1	ENSP00000256958	Q9Y6L6.181	A0A024RAU7.41	UPI0000043BED	-	-	1	-	-	-	2023-05-14	-	-	ENST00000256958.3:c.482-93T>G	-	-	-	-	-	-	-
	12:21178486:G:A	chr12:21178486	A	ENSG00000134538	ENST00000256958	Transcript	intron_variant	-	-	-	-	-	rs933629154	MODIFIER	-	1	-	SNV	SLCO1B1	HGNC	HGNC:10959	protein_coding	YES	NM_006446.5	-	1	P1	CCDS8685.1	ENSP00000256958	Q9Y6L6.181	A0A024RAU7.41	UPI0000043BED	-	-	1	-	-	-	2023-05-14	-	-	ENST00000256958.3:c.482-90G>A	-	-	-	-	-	-	-
	12:21178486:G:C	chr12:21178486	C	ENSG00000134538	ENST00000256958	Transcript	intron_variant	-	-	-	-	-	-	MODIFIER	-	1	-	SNV	SLCO1B1	HGNC	HGNC:10959	protein_coding	YES	NM_006446.5	-	1	P1	CCDS8685.1	ENSP00000256958	Q9Y6L6.181	A0A024RAU7.41	UPI0000043BED	-	-	1	-	-	-	2023-05-14	-	-	ENST00000256958.3:c.482-90G>C	-	-	-	-	-	-	-
	12:21178491:ATAAT:A	chr12:21178492-21178495	-	ENSG00000134538	ENST00000256958	Transcript	intron_variant	-	-	-	-	-	-	MODIFIER	-	1	-	deletion	SLCO1B1	HGNC	HGNC:10959	protein_coding	YES	NM_006446.5	-	1	P1	CCDS8685.1	ENSP00000256958	Q9Y6L6.181	A0A024RAU7.41	UPI0000043BED	-	-	1	-	-	-	2023-05-14	-	-	ENST00000256958.3:c.482-81_482-78del	-	-	-	-	-	-	-
	12:21178497:A:T	chr12:21178497	T	ENSG00000134538	ENST00000256958	Transcript	intron_variant	-	-	-	-	-	-	MODIFIER	-	1	-	SNV	SLCO1B1	HGNC	HGNC:10959	protein_coding	YES	NM_006446.5	-	1	P1	CCDS8685.1	ENSP00000256958	Q9Y6L6.181	A0A024RAU7.41	UPI0000043BED	-	-	1	-	-	-	2023-05-14	-	-	ENST00000256958.3:c.482-79A>T	-	-	-	-	-	-	-
	12:21178503:T:C	chr12:21178503	C	ENSG00000134538	ENST00000256958	Transcript	intron_variant	-	-	-	-	-	rs527424621	MODIFIER	-	1	-	SNV	SLCO1B1	HGNC	HGNC:10959	protein_coding	YES	NM_006446.5	-	1	P1	CCDS8685.1	ENSP00000256958	Q9Y6L6.181	A0A024RAU7.41	UPI0000043BED	-	-	1	-	-	-	2023-05-14	-	-	ENST00000256958.3:c.482-73T>C	-	-	0.0002	0.0008	0	0	0
	12:21178507:A:G	chr12:21178507	G	ENSG00000134538	ENST00000256958	Transcript	intron_variant	-	-	-	-	-	rs541218539	MODIFIER	-	1	-	SNV	SLCO1B1	HGNC	HGNC:10959	protein_coding	YES	NM_006446.5	-	1	P1	CCDS8685.1	ENSP00000256958	Q9Y6L6.181	A0A024RAU7.41	UPI0000043BED	-	-	1	-	-	-	2023-05-14	-	-	ENST00000256958.3:c.482-69A>G	-	-	0.0002	0.0008	0	0	0
	12:21178508:A:G	chr12:21178508	G	ENSG00000134538	ENST00000256958	Transcript	intron_variant	-	-	-	-	-	rs1468362991	MODIFIER	-	1	-	SNV	SLCO1B1	HGNC	HGNC:10959	protein_coding	YES	NM_006446.5	-	1	P1	CCDS8685.1	ENSP00000256958	Q9Y6L6.181	A0A024RAU7.41	UPI0000043BED	-	-	1	-	-	-	2023-05-14	-	-	ENST00000256958.3:c.482-68A>G	-	-	-	-	-	-	-
	12:21178509:G:A	chr12:21178509	A	ENSG00000134538	ENST00000256958	Transcript	intron_variant	-	-	-	-	-	-	MODIFIER	-	1	-	SNV	SLCO1B1	HGNC	HGNC:10959	protein_coding	YES	NM_006446.5	-	1	P1	CCDS8685.1	ENSP00000256958	Q9Y6L6.181	A0A024RAU7.41	UPI0000043BED	-	-	1	-	-	-	2023-05-14	-	-	ENST00000256958.3:c.482-67G>A	-	-	-	-	-	-	-
	12:21178511:A:T	chr12:21178511	T	ENSG00000134538	ENST00000256958	Transcript	intron_variant	-	-	-	-	-	-	MODIFIER	-	1	-	SNV	SLCO1B1	HGNC	HGNC:10959	protein_coding	YES	NM_006446.5	-	1	P1	CCDS8685.1	ENSP00000256958	Q9Y6L6.181	A0A024RAU7.41	UPI0000043BED	-	-	1	-	-	-	2023-05-14	-	-	ENST00000256958.3:c.482-65A>T	-	-	-	-	-	-	-
	12:21178516:A:ACCT	chr12:21178516-21178517	CCT	ENSG00000134538	ENST00000256958	Transcript	intron_variant	-	-	-	-	-	-	MODIFIER	-	1	-	insertion	SLCO1B1	HGNC	HGNC:10959	protein_coding	YES	NM_006446.5	-	1	P1	CCDS8685.1	ENSP00000256958	Q9Y6L6.181	A0A024RAU7.41	UPI0000043BED	-	-	1	-	-	-	2023-05-14	-	-	ENST00000256958.3:c.482-60_482-59insCCT	-	-	-	-	-	-	-
	12:21178517:A:G	chr12:21178517	G	ENSG00000134538	ENST00000256958	Transcript	intron_variant	-	-	-	-	-	-	MODIFIER	-	1	-	SNV	SLCO1B1	HGNC	HGNC:10959	protein_coding	YES	NM_006446.5	-	1	P1	CCDS8685.1	ENSP00000256958	Q9Y6L6.181	A0A024RAU7.41	UPI0000043BED	-	-	1	-	-	-	2023-05-14	-	-	ENST00000256958.3:c.482-59A>G	-	-	-	-	-	-	-
	12:21178517:A:T	chr12:21178517	T	ENSG00000134538	ENST00000256958	Transcript	intron_variant	-	-	-	-	-	rs1001673372	MODIFIER	-	1	-	SNV	SLCO1B1	HGNC	HGNC:10959	protein_coding	YES	NM_006446.5	-	1	P1	CCDS8685.1	ENSP00000256958	Q9Y6L6.181	A0A024RAU7.41	UPI0000043BED	-	-	1	-	-	-	2023-05-14	-	-	ENST00000256958.3:c.482-59A>T	-	-	-	-	-	-	-
	12:21178520:T:C	chr12:21178520	C	ENSG00000134538	ENST00000256958	Transcript	intron_variant	-	-	-	-	-	-	MODIFIER	-	1	-	SNV	SLCO1B1	HGNC	HGNC:10959	protein_coding	YES	NM_006446.5	-	1	P1	CCDS8685.1	ENSP00000256958	Q9Y6L6.181	A0A024RAU7.41	UPI0000043BED	-	-	1	-	-	-	2023-05-14	-	-	ENST00000256958.3:c.482-56T>C	-	-	-	-	-	-	-
	12:21178521:G:T	chr12:21178521	T	ENSG00000134538	ENST00000256958	Transcript	intron_variant	-	-	-	-	-	-	MODIFIER	-	1	-	SNV	SLCO1B1	HGNC	HGNC:10959	protein_coding	YES	NM_006446.5	-	1	P1	CCDS8685.1	ENSP00000256958	Q9Y6L6.181	A0A024RAU7.41	UPI0000043BED	-	-	1	-	-	-	2023-05-14	-	-	ENST00000256958.3:c.482-55G>T	-	-	-	-	-	-	-
	12:21178527:G:C	chr12:21178527	C	ENSG00000134538	ENST00000256958	Transcript	intron_variant	-	-	-	-	-	rs957588336	MODIFIER	-	1	-	SNV	SLCO1B1	HGNC	HGNC:10959	protein_coding	YES	NM_006446.5	-	1	P1	CCDS8685.1	ENSP00000256958	Q9Y6L6.181	A0A024RAU7.41	UPI0000043BED	-	-	1	-	-	-	2023-05-14	-	-	ENST00000256958.3:c.482-49G>C	-	-	-	-	-	-	-
	12:21178534:T:C	chr12:21178534	C	ENSG00000134538	ENST00000256958	Transcript	intron_variant	-	-	-	-	-	-	MODIFIER	-	1	-	SNV	SLCO1B1	HGNC	HGNC:10959	protein_coding	YES	NM_006446.5	-	1	P1	CCDS8685.1	ENSP00000256958	Q9Y6L6.181	A0A024RAU7.41	UPI0000043BED	-	-	1	-	-	-	2023-05-14	-	-	ENST00000256958.3:c.482-42T>C	-	-	-	-	-	-	-
	12:21178539:T:C	chr12:21178539	C	ENSG00000134538	ENST00000256958	Transcript	intron_variant	-	-	-	-	-	rs780909054	MODIFIER	-	1	-	SNV	SLCO1B1	HGNC	HGNC:10959	protein_coding	YES	NM_006446.5	-	1	P1	CCDS8685.1	ENSP00000256958	Q9Y6L6.181	A0A024RAU7.41	UPI0000043BED	-	-	1	-	-	-	2023-05-14	-	-	ENST00000256958.3:c.482-37T>C	-	-	-	-	-	-	-
	12:21178542:A:G	chr12:21178542	G	ENSG00000134538	ENST00000256958	Transcript	intron_variant	-	-	-	-	-	rs745674032	MODIFIER	-	1	-	SNV	SLCO1B1	HGNC	HGNC:10959	protein_coding	YES	NM_006446.5	-	1	P1	CCDS8685.1	ENSP00000256958	Q9Y6L6.181	A0A024RAU7.41	UPI0000043BED	-	-	1	-	-	-	2023-05-14	-	-	ENST00000256958.3:c.482-34A>G	-	-	-	-	-	-	-
	12:21178543:T:C	chr12:21178543	C	ENSG00000134538	ENST00000256958	Transcript	intron_variant	-	-	-	-	-	-	MODIFIER	-	1	-	SNV	SLCO1B1	HGNC	HGNC:10959	protein_coding	YES	NM_006446.5	-	1	P1	CCDS8685.1	ENSP00000256958	Q9Y6L6.181	A0A024RAU7.41	UPI0000043BED	-	-	1	-	-	-	2023-05-14	-	-	ENST00000256958.3:c.482-33T>C	-	-	-	-	-	-	-
	12:21178544:G:A	chr12:21178544	A	ENSG00000134538	ENST00000256958	Transcript	intron_variant	-	-	-	-	-	-	MODIFIER	-	1	-	SNV	SLCO1B1	HGNC	HGNC:10959	protein_coding	YES	NM_006446.5	-	1	P1	CCDS8685.1	ENSP00000256958	Q9Y6L6.181	A0A024RAU7.41	UPI0000043BED	-	-	1	-	-	-	2023-05-14	-	-	ENST00000256958.3:c.482-32G>A	-	-	-	-	-	-	-
	12:21178548:A:G	chr12:21178548	G	ENSG00000134538	ENST00000256958	Transcript	intron_variant	-	-	-	-	-	rs369060636	MODIFIER	-	1	-	SNV	SLCO1B1	HGNC	HGNC:10959	protein_coding	YES	NM_006446.5	-	1	P1	CCDS8685.1	ENSP00000256958	Q9Y6L6.181	A0A024RAU7.41	UPI0000043BED	-	-	1	-	-	-	2023-05-14	-	-	ENST00000256958.3:c.482-28A>G	-	-	-	-	-	-	-
	12:21178551:A:G	chr12:21178551	G	ENSG00000134538	ENST00000256958	Transcript	intron_variant	-	-	-	-	-	rs943611305	MODIFIER	-	1	-	SNV	SLCO1B1	HGNC	HGNC:10959	protein_coding	YES	NM_006446.5	-	1	P1	CCDS8685.1	ENSP00000256958	Q9Y6L6.181	A0A024RAU7.41	UPI0000043BED	-	-	1	-	-	-	2023-05-14	-	-	ENST00000256958.3:c.482-25A>G	-	-	-	-	-	-	-
	12:21178559:C:G	chr12:21178559	G	ENSG00000134538	ENST00000256958	Transcript	intron_variant	-	-	-	-	-	-	MODIFIER	-	1	-	SNV	SLCO1B1	HGNC	HGNC:10959	protein_coding	YES	NM_006446.5	-	1	P1	CCDS8685.1	ENSP00000256958	Q9Y6L6.181	A0A024RAU7.41	UPI0000043BED	-	-	1	-	-	-	2023-05-14	-	-	ENST00000256958.3:c.482-17C>G	-	-	-	-	-	-	-
	12:21178560:T:C	chr12:21178560	C	ENSG00000134538	ENST00000256958	Transcript	intron_variant	-	-	-	-	-	-	MODIFIER	-	1	-	SNV	SLCO1B1	HGNC	HGNC:10959	protein_coding	YES	NM_006446.5	-	1	P1	CCDS8685.1	ENSP00000256958	Q9Y6L6.181	A0A024RAU7.41	UPI0000043BED	-	-	1	-	-	-	2023-05-14	-	-	ENST00000256958.3:c.482-16T>C	-	-	-	-	-	-	-
	12:21178561:C:G	chr12:21178561	G	ENSG00000134538	ENST00000256958	Transcript	intron_variant	-	-	-	-	-	-	MODIFIER	-	1	-	SNV	SLCO1B1	HGNC	HGNC:10959	protein_coding	YES	NM_006446.5	-	1	P1	CCDS8685.1	ENSP00000256958	Q9Y6L6.181	A0A024RAU7.41	UPI0000043BED	-	-	1	-	-	-	2023-05-14	-	-	ENST00000256958.3:c.482-15C>G	-	-	-	-	-	-	-
	12:21178561:CTCTTA:C	chr12:21178562-21178566	-	ENSG00000134538	ENST00000256958	Transcript	intron_variant	-	-	-	-	-	rs752212835	MODIFIER	-	1	-	deletion	SLCO1B1	HGNC	HGNC:10959	protein_coding	YES	NM_006446.5	-	1	P1	CCDS8685.1	ENSP00000256958	Q9Y6L6.181	A0A024RAU7.41	UPI0000043BED	-	-	1	-	-	-	2023-05-14	-	-	ENST00000256958.3:c.482-11_482-7del	-	-	-	-	-	-	-
	12:21178565:T:C	chr12:21178565	C	ENSG00000134538	ENST00000256958	Transcript	intron_variant	-	-	-	-	-	rs74541382	MODIFIER	-	1	-	SNV	SLCO1B1	HGNC	HGNC:10959	protein_coding	YES	NM_006446.5	-	1	P1	CCDS8685.1	ENSP00000256958	Q9Y6L6.181	A0A024RAU7.41	UPI0000043BED	-	-	1	-	-	-	2023-05-14	-	-	ENST00000256958.3:c.482-11T>C	-	-	0.0046	0.0174	0	0	0
	12:21178572:A:G	chr12:21178572	G	ENSG00000134538	ENST00000256958	Transcript	splice_region_variant,intron_variant	-	-	-	-	-	rs748610986	LOW	-	1	-	SNV	SLCO1B1	HGNC	HGNC:10959	protein_coding	YES	NM_006446.5	-	1	P1	CCDS8685.1	ENSP00000256958	Q9Y6L6.181	A0A024RAU7.41	UPI0000043BED	-	-	1	-	-	-	2023-05-14	-	-	ENST00000256958.3:c.482-4A>G	-	-	-	-	-	-	-
	12:21178572:A:T	chr12:21178572	T	ENSG00000134538	ENST00000256958	Transcript	splice_region_variant,intron_variant	-	-	-	-	-	rs748610986	LOW	-	1	-	SNV	SLCO1B1	HGNC	HGNC:10959	protein_coding	YES	NM_006446.5	-	1	P1	CCDS8685.1	ENSP00000256958	Q9Y6L6.181	A0A024RAU7.41	UPI0000043BED	-	-	1	-	-	-	2023-05-14	-	-	ENST00000256958.3:c.482-4A>T	-	-	-	-	-	-	-
	12:21178573:T:C	chr12:21178573	C	ENSG00000134538	ENST00000256958	Transcript	splice_region_variant,intron_variant	-	-	-	-	-	-	LOW	-	1	-	SNV	SLCO1B1	HGNC	HGNC:10959	protein_coding	YES	NM_006446.5	-	1	P1	CCDS8685.1	ENSP00000256958	Q9Y6L6.181	A0A024RAU7.41	UPI0000043BED	-	-	1	-	-	-	2023-05-14	-	-	ENST00000256958.3:c.482-3T>C	-	-	-	-	-	-	-
	12:21178574:A:C	chr12:21178574	C	ENSG00000134538	ENST00000256958	Transcript	splice_acceptor_variant	-	-	-	-	-	-	HIGH	-	1	-	SNV	SLCO1B1	HGNC	HGNC:10959	protein_coding	YES	NM_006446.5	-	1	P1	CCDS8685.1	ENSP00000256958	Q9Y6L6.181	A0A024RAU7.41	UPI0000043BED	-	-	1	-	-	-	2023-05-14	-	-	ENST00000256958.3:c.482-2A>C	-	-	-	-	-	-	-
	12:21178576:G:A	chr12:21178576	A	ENSG00000134538	ENST00000256958	Transcript	missense_variant,splice_region_variant	586	482	161	G/D	gGt/gAt	rs1416355942,COSV57011893	MODERATE	-	1	-	SNV	SLCO1B1	HGNC	HGNC:10959	protein_coding	YES	NM_006446.5	-	1	P1	CCDS8685.1	ENSP00000256958	Q9Y6L6.181	A0A024RAU7.41	UPI0000043BED	-	-	1	tolerated(0.23)	benign(0.358)	2023-06-15	-	PROSITE_profiles:PS50850,PANTHER:PTHR11388,PANTHER:PTHR11388:SF82,Pfam:PF03137,TIGRFAM:TIGR00805,Superfamily:SSF103473	-	ENST00000256958.3:c.482G>A	ENSP00000256958.2:p.Gly161Asp	-	-	-	-	-	-
	12:21178579:G:A	chr12:21178579	A	ENSG00000134538	ENST00000256958	Transcript	missense_variant	589	485	162	C/Y	tGt/tAt	rs138374684	MODERATE	-	1	-	SNV	SLCO1B1	HGNC	HGNC:10959	protein_coding	YES	NM_006446.5	-	1	P1	CCDS8685.1	ENSP00000256958	Q9Y6L6.181	A0A024RAU7.41	UPI0000043BED	-	-	1	deleterious(0.01)	probably_damaging(0.986)	2023-06-15	-	PROSITE_profiles:PS50850,PANTHER:PTHR11388,PANTHER:PTHR11388:SF82,Pfam:PF03137,TIGRFAM:TIGR00805,Superfamily:SSF103473	-	ENST00000256958.3:c.485G>A	ENSP00000256958.2:p.Cys162Tyr	-	-	-	-	-	-
	12:21178601:C:T	chr12:21178601	T	ENSG00000134538	ENST00000256958	Transcript	synonymous_variant	611	507	169	Y	taC/taT	-	LOW	-	1	-	SNV	SLCO1B1	HGNC	HGNC:10959	protein_coding	YES	NM_006446.5	-	1	P1	CCDS8685.1	ENSP00000256958	Q9Y6L6.181	A0A024RAU7.41	UPI0000043BED	-	-	1	-	-	2023-06-15	-	PROSITE_profiles:PS50850,PANTHER:PTHR11388,PANTHER:PTHR11388:SF82,Pfam:PF03137,TIGRFAM:TIGR00805,Superfamily:SSF103473	-	ENST00000256958.3:c.507C>T	ENSP00000256958.2:p.Tyr169%3D	-	-	-	-	-	-
	12:21178602:A:T	chr12:21178602	T	ENSG00000134538	ENST00000256958	Transcript	missense_variant	612	508	170	M/L	Atg/Ttg	rs764816711	MODERATE	-	1	-	SNV	SLCO1B1	HGNC	HGNC:10959	protein_coding	YES	NM_006446.5	-	1	P1	CCDS8685.1	ENSP00000256958	Q9Y6L6.181	A0A024RAU7.41	UPI0000043BED	-	-	1	deleterious(0.03)	benign(0.122)	2023-06-15	-	PROSITE_profiles:PS50850,PANTHER:PTHR11388,PANTHER:PTHR11388:SF82,Pfam:PF03137,TIGRFAM:TIGR00805,Superfamily:SSF103473	-	ENST00000256958.3:c.508A>T	ENSP00000256958.2:p.Met170Leu	-	-	-	-	-	-
	12:21178603:T:C	chr12:21178603	C	ENSG00000134538	ENST00000256958	Transcript	missense_variant	613	509	170	M/T	aTg/aCg	rs923006074,COSV57019425	MODERATE	-	1	-	SNV	SLCO1B1	HGNC	HGNC:10959	protein_coding	YES	NM_006446.5	-	1	P1	CCDS8685.1	ENSP00000256958	Q9Y6L6.181	A0A024RAU7.41	UPI0000043BED	-	-	1	tolerated(0.07)	benign(0.364)	2023-06-15	-	PROSITE_profiles:PS50850,PANTHER:PTHR11388,PANTHER:PTHR11388:SF82,Pfam:PF03137,TIGRFAM:TIGR00805,Superfamily:SSF103473	-	ENST00000256958.3:c.509T>C	ENSP00000256958.2:p.Met170Thr	-	-	-	-	-	-
	12:21178604:G:A	chr12:21178604	A	ENSG00000134538	ENST00000256958	Transcript	missense_variant	614	510	170	M/I	atG/atA	rs953244605	MODERATE	-	1	-	SNV	SLCO1B1	HGNC	HGNC:10959	protein_coding	YES	NM_006446.5	-	1	P1	CCDS8685.1	ENSP00000256958	Q9Y6L6.181	A0A024RAU7.41	UPI0000043BED	-	-	1	deleterious(0.03)	benign(0.364)	2023-06-15	-	PROSITE_profiles:PS50850,PANTHER:PTHR11388,PANTHER:PTHR11388:SF82,Pfam:PF03137,TIGRFAM:TIGR00805,Superfamily:SSF103473	-	ENST00000256958.3:c.510G>A	ENSP00000256958.2:p.Met170Ile	-	-	-	-	-	-
	12:21178605:T:G	chr12:21178605	G	ENSG00000134538	ENST00000256958	Transcript	missense_variant	615	511	171	W/G	Tgg/Ggg	-	MODERATE	-	1	-	SNV	SLCO1B1	HGNC	HGNC:10959	protein_coding	YES	NM_006446.5	-	1	P1	CCDS8685.1	ENSP00000256958	Q9Y6L6.181	A0A024RAU7.41	UPI0000043BED	-	-	1	deleterious(0)	probably_damaging(1)	2023-06-15	-	PROSITE_profiles:PS50850,PANTHER:PTHR11388,PANTHER:PTHR11388:SF82,Pfam:PF03137,TIGRFAM:TIGR00805,Superfamily:SSF103473	-	ENST00000256958.3:c.511T>G	ENSP00000256958.2:p.Trp171Gly	-	-	-	-	-	-
	12:21178606:G:A	chr12:21178606	A	ENSG00000134538	ENST00000256958	Transcript	stop_gained	616	512	171	W/*	tGg/tAg	rs985933022	HIGH	-	1	-	SNV	SLCO1B1	HGNC	HGNC:10959	protein_coding	YES	NM_006446.5	-	1	P1	CCDS8685.1	ENSP00000256958	Q9Y6L6.181	A0A024RAU7.41	UPI0000043BED	-	-	1	-	-	2023-06-15	-	PROSITE_profiles:PS50850,PANTHER:PTHR11388,PANTHER:PTHR11388:SF82,Pfam:PF03137,TIGRFAM:TIGR00805,Superfamily:SSF103473	-	ENST00000256958.3:c.512G>A	ENSP00000256958.2:p.Trp171Ter	-	-	-	-	-	-
	12:21178612:A:G	chr12:21178612	G	ENSG00000134538	ENST00000256958	Transcript	missense_variant	622	518	173	Y/C	tAt/tGt	rs141467543	MODERATE	-	1	-	SNV	SLCO1B1	HGNC	HGNC:10959	protein_coding	YES	NM_006446.5	-	1	P1	CCDS8685.1	ENSP00000256958	Q9Y6L6.181	A0A024RAU7.41	UPI0000043BED	-	-	1	deleterious(0)	possibly_damaging(0.906)	2023-06-15	-	PROSITE_profiles:PS50850,PANTHER:PTHR11388,PANTHER:PTHR11388:SF82,Pfam:PF03137,TIGRFAM:TIGR00805,Superfamily:SSF103473	-	ENST00000256958.3:c.518A>G	ENSP00000256958.2:p.Tyr173Cys	-	0	0	0	0	0
	12:21178613:T:C	chr12:21178613	C	ENSG00000134538	ENST00000256958	Transcript	synonymous_variant	623	519	173	Y	taT/taC	-	LOW	-	1	-	SNV	SLCO1B1	HGNC	HGNC:10959	protein_coding	YES	NM_006446.5	-	1	P1	CCDS8685.1	ENSP00000256958	Q9Y6L6.181	A0A024RAU7.41	UPI0000043BED	-	-	1	-	-	2023-06-15	-	PROSITE_profiles:PS50850,PANTHER:PTHR11388,PANTHER:PTHR11388:SF82,Pfam:PF03137,TIGRFAM:TIGR00805,Superfamily:SSF103473	-	ENST00000256958.3:c.519T>C	ENSP00000256958.2:p.Tyr173%3D	-	-	-	-	-	-
	12:21178615:T:C	chr12:21178615	C	ENSG00000134538	ENST00000256958	Transcript	missense_variant	625	521	174	V/A	gTg/gCg	rs4149056,CM043777,COSV57010105	MODERATE	-	1	-	SNV	SLCO1B1	HGNC	HGNC:10959	protein_coding	YES	NM_006446.5	-	1	P1	CCDS8685.1	ENSP00000256958	Q9Y6L6.181	A0A024RAU7.41	UPI0000043BED	-	-	1	deleterious(0)	probably_damaging(0.996)	2023-06-15	-	PROSITE_profiles:PS50850,PANTHER:PTHR11388,PANTHER:PTHR11388:SF82,Pfam:PF03137,TIGRFAM:TIGR00805,Superfamily:SSF103473	-	ENST00000256958.3:c.521T>C	ENSP00000256958.2:p.Val174Ala	-	0.0877	0.0136	0.134	0.123	0.161
	12:21178616:G:A	chr12:21178616	A	ENSG00000134538	ENST00000256958	Transcript	synonymous_variant	626	522	174	V	gtG/gtA	rs761806682	LOW	-	1	-	SNV	SLCO1B1	HGNC	HGNC:10959	protein_coding	YES	NM_006446.5	-	1	P1	CCDS8685.1	ENSP00000256958	Q9Y6L6.181	A0A024RAU7.41	UPI0000043BED	-	-	1	-	-	2023-06-15	-	PROSITE_profiles:PS50850,PANTHER:PTHR11388,PANTHER:PTHR11388:SF82,Pfam:PF03137,TIGRFAM:TIGR00805,Superfamily:SSF103473	-	ENST00000256958.3:c.522G>A	ENSP00000256958.2:p.Val174%3D	-	-	-	-	-	-
	12:21178620:A:G	chr12:21178620	G	ENSG00000134538	ENST00000256958	Transcript	missense_variant	630	526	176	M/V	Atg/Gtg	-	MODERATE	-	1	-	SNV	SLCO1B1	HGNC	HGNC:10959	protein_coding	YES	NM_006446.5	-	1	P1	CCDS8685.1	ENSP00000256958	Q9Y6L6.181	A0A024RAU7.41	UPI0000043BED	-	-	1	tolerated(0.08)	benign(0.028)	2023-06-15	-	PROSITE_profiles:PS50850,PANTHER:PTHR11388,PANTHER:PTHR11388:SF82,Pfam:PF03137,TIGRFAM:TIGR00805,Superfamily:SSF103473	-	ENST00000256958.3:c.526A>G	ENSP00000256958.2:p.Met176Val	-	-	-	-	-	-
	12:21178620:A:T	chr12:21178620	T	ENSG00000134538	ENST00000256958	Transcript	missense_variant	630	526	176	M/L	Atg/Ttg	-	MODERATE	-	1	-	SNV	SLCO1B1	HGNC	HGNC:10959	protein_coding	YES	NM_006446.5	-	1	P1	CCDS8685.1	ENSP00000256958	Q9Y6L6.181	A0A024RAU7.41	UPI0000043BED	-	-	1	tolerated(0.68)	benign(0.009)	2023-06-15	-	PROSITE_profiles:PS50850,PANTHER:PTHR11388,PANTHER:PTHR11388:SF82,Pfam:PF03137,TIGRFAM:TIGR00805,Superfamily:SSF103473	-	ENST00000256958.3:c.526A>T	ENSP00000256958.2:p.Met176Leu	-	-	-	-	-	-
	12:21178621:T:A	chr12:21178621	A	ENSG00000134538	ENST00000256958	Transcript	missense_variant	631	527	176	M/K	aTg/aAg	-	MODERATE	-	1	-	SNV	SLCO1B1	HGNC	HGNC:10959	protein_coding	YES	NM_006446.5	-	1	P1	CCDS8685.1	ENSP00000256958	Q9Y6L6.181	A0A024RAU7.41	UPI0000043BED	-	-	1	deleterious(0)	possibly_damaging(0.808)	2023-06-15	-	PROSITE_profiles:PS50850,PANTHER:PTHR11388,PANTHER:PTHR11388:SF82,Pfam:PF03137,TIGRFAM:TIGR00805,Superfamily:SSF103473	-	ENST00000256958.3:c.527T>A	ENSP00000256958.2:p.Met176Lys	-	-	-	-	-	-
	12:21178621:T:C	chr12:21178621	C	ENSG00000134538	ENST00000256958	Transcript	missense_variant	631	527	176	M/T	aTg/aCg	rs548326440	MODERATE	-	1	-	SNV	SLCO1B1	HGNC	HGNC:10959	protein_coding	YES	NM_006446.5	-	1	P1	CCDS8685.1	ENSP00000256958	Q9Y6L6.181	A0A024RAU7.41	UPI0000043BED	-	-	1	deleterious(0.01)	possibly_damaging(0.568)	2023-06-15	-	PROSITE_profiles:PS50850,PANTHER:PTHR11388,PANTHER:PTHR11388:SF82,Pfam:PF03137,TIGRFAM:TIGR00805,Superfamily:SSF103473	-	ENST00000256958.3:c.527T>C	ENSP00000256958.2:p.Met176Thr	-	-	-	-	-	-
	12:21178621:TG:T	chr12:21178622	-	ENSG00000134538	ENST00000256958	Transcript	frameshift_variant	632	528	176	M/X	atG/at	rs755871104	HIGH	-	1	-	deletion	SLCO1B1	HGNC	HGNC:10959	protein_coding	YES	NM_006446.5	-	1	P1	CCDS8685.1	ENSP00000256958	Q9Y6L6.181	A0A024RAU7.41	UPI0000043BED	-	-	1	-	-	2023-06-15	-	PROSITE_profiles:PS50850,PANTHER:PTHR11388,PANTHER:PTHR11388:SF82,Pfam:PF03137,TIGRFAM:TIGR00805,Superfamily:SSF103473	-	ENST00000256958.3:c.530del	ENSP00000256958.2:p.Gly177ValfsTer7	2	-	-	-	-	-
	12:21178622:G:A	chr12:21178622	A	ENSG00000134538	ENST00000256958	Transcript	missense_variant	632	528	176	M/I	atG/atA	rs1448896191	MODERATE	-	1	-	SNV	SLCO1B1	HGNC	HGNC:10959	protein_coding	YES	NM_006446.5	-	1	P1	CCDS8685.1	ENSP00000256958	Q9Y6L6.181	A0A024RAU7.41	UPI0000043BED	-	-	1	deleterious(0.04)	benign(0.06)	2023-06-15	-	PROSITE_profiles:PS50850,PANTHER:PTHR11388,PANTHER:PTHR11388:SF82,Pfam:PF03137,TIGRFAM:TIGR00805,Superfamily:SSF103473	-	ENST00000256958.3:c.528G>A	ENSP00000256958.2:p.Met176Ile	-	-	-	-	-	-
	12:21178630:T:C	chr12:21178630	C	ENSG00000134538	ENST00000256958	Transcript	missense_variant	640	536	179	M/T	aTg/aCg	-	MODERATE	-	1	-	SNV	SLCO1B1	HGNC	HGNC:10959	protein_coding	YES	NM_006446.5	-	1	P1	CCDS8685.1	ENSP00000256958	Q9Y6L6.181	A0A024RAU7.41	UPI0000043BED	-	-	1	deleterious(0.03)	benign(0.06)	2023-06-15	-	PROSITE_profiles:PS50850,PANTHER:PTHR11388,PANTHER:PTHR11388:SF82,Pfam:PF03137,TIGRFAM:TIGR00805,Superfamily:SSF103473	-	ENST00000256958.3:c.536T>C	ENSP00000256958.2:p.Met179Thr	-	-	-	-	-	-
	12:21178635:C:T	chr12:21178635	T	ENSG00000134538	ENST00000256958	Transcript	missense_variant	645	541	181	R/C	Cgt/Tgt	rs138965366,COSV57012066	MODERATE	-	1	-	SNV	SLCO1B1	HGNC	HGNC:10959	protein_coding	YES	NM_006446.5	-	1	P1	CCDS8685.1	ENSP00000256958	Q9Y6L6.181	A0A024RAU7.41	UPI0000043BED	-	-	1	deleterious(0)	probably_damaging(0.991)	2023-06-15	-	PROSITE_profiles:PS50850,PANTHER:PTHR11388,PANTHER:PTHR11388:SF82,Pfam:PF03137,TIGRFAM:TIGR00805,Superfamily:SSF103473	-	ENST00000256958.3:c.541C>T	ENSP00000256958.2:p.Arg181Cys	-	-	-	-	-	-
	12:21178636:G:A	chr12:21178636	A	ENSG00000134538	ENST00000256958	Transcript	missense_variant	646	542	181	R/H	cGt/cAt	rs142101690	MODERATE	-	1	-	SNV	SLCO1B1	HGNC	HGNC:10959	protein_coding	YES	NM_006446.5	-	1	P1	CCDS8685.1	ENSP00000256958	Q9Y6L6.181	A0A024RAU7.41	UPI0000043BED	-	-	1	deleterious(0)	probably_damaging(0.999)	2023-06-15	-	PROSITE_profiles:PS50850,PANTHER:PTHR11388,PANTHER:PTHR11388:SF82,Pfam:PF03137,TIGRFAM:TIGR00805,Superfamily:SSF103473	-	ENST00000256958.3:c.542G>A	ENSP00000256958.2:p.Arg181His	-	-	-	-	-	-
	12:21178636:G:T	chr12:21178636	T	ENSG00000134538	ENST00000256958	Transcript	missense_variant	646	542	181	R/L	cGt/cTt	-	MODERATE	-	1	-	SNV	SLCO1B1	HGNC	HGNC:10959	protein_coding	YES	NM_006446.5	-	1	P1	CCDS8685.1	ENSP00000256958	Q9Y6L6.181	A0A024RAU7.41	UPI0000043BED	-	-	1	deleterious(0)	probably_damaging(0.987)	2023-06-15	-	PROSITE_profiles:PS50850,PANTHER:PTHR11388,PANTHER:PTHR11388:SF82,Pfam:PF03137,TIGRFAM:TIGR00805,Superfamily:SSF103473	-	ENST00000256958.3:c.542G>T	ENSP00000256958.2:p.Arg181Leu	-	-	-	-	-	-
	12:21178639:G:A	chr12:21178639	A	ENSG00000134538	ENST00000256958	Transcript	missense_variant	649	545	182	G/E	gGa/gAa	rs929929393	MODERATE	-	1	-	SNV	SLCO1B1	HGNC	HGNC:10959	protein_coding	YES	NM_006446.5	-	1	P1	CCDS8685.1	ENSP00000256958	Q9Y6L6.181	A0A024RAU7.41	UPI0000043BED	-	-	1	deleterious(0)	probably_damaging(1)	2023-06-15	-	PROSITE_profiles:PS50850,PANTHER:PTHR11388,PANTHER:PTHR11388:SF82,Pfam:PF03137,TIGRFAM:TIGR00805,Superfamily:SSF103473	-	ENST00000256958.3:c.545G>A	ENSP00000256958.2:p.Gly182Glu	-	-	-	-	-	-
	12:21178647:G:C	chr12:21178647	C	ENSG00000134538	ENST00000256958	Transcript	missense_variant	657	553	185	E/Q	Gag/Cag	rs1385633842,COSV57011436	MODERATE	-	1	-	SNV	SLCO1B1	HGNC	HGNC:10959	protein_coding	YES	NM_006446.5	-	1	P1	CCDS8685.1	ENSP00000256958	Q9Y6L6.181	A0A024RAU7.41	UPI0000043BED	-	-	1	deleterious(0)	probably_damaging(1)	2023-06-15	-	PROSITE_profiles:PS50850,PANTHER:PTHR11388,PANTHER:PTHR11388:SF82,Pfam:PF03137,TIGRFAM:TIGR00805,Superfamily:SSF103473	-	ENST00000256958.3:c.553G>C	ENSP00000256958.2:p.Glu185Gln	-	-	-	-	-	-
	12:21178647:G:T	chr12:21178647	T	ENSG00000134538	ENST00000256958	Transcript	stop_gained	657	553	185	E/*	Gag/Tag	COSV57011436	HIGH	-	1	-	SNV	SLCO1B1	HGNC	HGNC:10959	protein_coding	YES	NM_006446.5	-	1	P1	CCDS8685.1	ENSP00000256958	Q9Y6L6.181	A0A024RAU7.41	UPI0000043BED	-	-	1	-	-	2023-06-15	-	PROSITE_profiles:PS50850,PANTHER:PTHR11388,PANTHER:PTHR11388:SF82,Pfam:PF03137,TIGRFAM:TIGR00805,Superfamily:SSF103473	-	ENST00000256958.3:c.553G>T	ENSP00000256958.2:p.Glu185Ter	-	-	-	-	-	-
	12:21178649:G:A	chr12:21178649	A	ENSG00000134538	ENST00000256958	Transcript	synonymous_variant	659	555	185	E	gaG/gaA	rs1433684393,COSV57019459	LOW	-	1	-	SNV	SLCO1B1	HGNC	HGNC:10959	protein_coding	YES	NM_006446.5	-	1	P1	CCDS8685.1	ENSP00000256958	Q9Y6L6.181	A0A024RAU7.41	UPI0000043BED	-	-	1	-	-	2023-06-15	-	PROSITE_profiles:PS50850,PANTHER:PTHR11388,PANTHER:PTHR11388:SF82,Pfam:PF03137,TIGRFAM:TIGR00805,Superfamily:SSF103473	-	ENST00000256958.3:c.555G>A	ENSP00000256958.2:p.Glu185%3D	-	-	-	-	-	-
	12:21178653:C:T	chr12:21178653	T	ENSG00000134538	ENST00000256958	Transcript	missense_variant	663	559	187	P/S	Ccc/Tcc	COSV57014580	MODERATE	-	1	-	SNV	SLCO1B1	HGNC	HGNC:10959	protein_coding	YES	NM_006446.5	-	1	P1	CCDS8685.1	ENSP00000256958	Q9Y6L6.181	A0A024RAU7.41	UPI0000043BED	-	-	1	deleterious(0)	probably_damaging(0.992)	2023-06-15	-	PROSITE_profiles:PS50850,PANTHER:PTHR11388,PANTHER:PTHR11388:SF82,Pfam:PF03137,TIGRFAM:TIGR00805,Superfamily:SSF103473	-	ENST00000256958.3:c.559C>T	ENSP00000256958.2:p.Pro187Ser	-	-	-	-	-	-
	12:21178654:C:G	chr12:21178654	G	ENSG00000134538	ENST00000256958	Transcript	missense_variant	664	560	187	P/R	cCc/cGc	-	MODERATE	-	1	-	SNV	SLCO1B1	HGNC	HGNC:10959	protein_coding	YES	NM_006446.5	-	1	P1	CCDS8685.1	ENSP00000256958	Q9Y6L6.181	A0A024RAU7.41	UPI0000043BED	-	-	1	deleterious(0)	probably_damaging(1)	2023-06-15	-	PROSITE_profiles:PS50850,PANTHER:PTHR11388,PANTHER:PTHR11388:SF82,Pfam:PF03137,TIGRFAM:TIGR00805,Superfamily:SSF103473	-	ENST00000256958.3:c.560C>G	ENSP00000256958.2:p.Pro187Arg	-	-	-	-	-	-
	12:21178655:C:T	chr12:21178655	T	ENSG00000134538	ENST00000256958	Transcript	synonymous_variant	665	561	187	P	ccC/ccT	-	LOW	-	1	-	SNV	SLCO1B1	HGNC	HGNC:10959	protein_coding	YES	NM_006446.5	-	1	P1	CCDS8685.1	ENSP00000256958	Q9Y6L6.181	A0A024RAU7.41	UPI0000043BED	-	-	1	-	-	2023-06-15	-	PROSITE_profiles:PS50850,PANTHER:PTHR11388,PANTHER:PTHR11388:SF82,Pfam:PF03137,TIGRFAM:TIGR00805,Superfamily:SSF103473	-	ENST00000256958.3:c.561C>T	ENSP00000256958.2:p.Pro187%3D	-	-	-	-	-	-
	12:21178656:A:G	chr12:21178656	G	ENSG00000134538	ENST00000256958	Transcript	missense_variant	666	562	188	I/V	Ata/Gta	-	MODERATE	-	1	-	SNV	SLCO1B1	HGNC	HGNC:10959	protein_coding	YES	NM_006446.5	-	1	P1	CCDS8685.1	ENSP00000256958	Q9Y6L6.181	A0A024RAU7.41	UPI0000043BED	-	-	1	tolerated(0.17)	benign(0.116)	2023-06-15	-	PROSITE_profiles:PS50850,PANTHER:PTHR11388,PANTHER:PTHR11388:SF82,Pfam:PF03137,TIGRFAM:TIGR00805,Superfamily:SSF103473	-	ENST00000256958.3:c.562A>G	ENSP00000256958.2:p.Ile188Val	-	-	-	-	-	-
	12:21178657:T:C	chr12:21178657	C	ENSG00000134538	ENST00000256958	Transcript	missense_variant	667	563	188	I/T	aTa/aCa	-	MODERATE	-	1	-	SNV	SLCO1B1	HGNC	HGNC:10959	protein_coding	YES	NM_006446.5	-	1	P1	CCDS8685.1	ENSP00000256958	Q9Y6L6.181	A0A024RAU7.41	UPI0000043BED	-	-	1	deleterious(0)	possibly_damaging(0.633)	2023-06-15	-	PROSITE_profiles:PS50850,PANTHER:PTHR11388,PANTHER:PTHR11388:SF82,Pfam:PF03137,TIGRFAM:TIGR00805,Superfamily:SSF103473	-	ENST00000256958.3:c.563T>C	ENSP00000256958.2:p.Ile188Thr	-	-	-	-	-	-
	12:21178658:A:G	chr12:21178658	G	ENSG00000134538	ENST00000256958	Transcript	missense_variant	668	564	188	I/M	atA/atG	-	MODERATE	-	1	-	SNV	SLCO1B1	HGNC	HGNC:10959	protein_coding	YES	NM_006446.5	-	1	P1	CCDS8685.1	ENSP00000256958	Q9Y6L6.181	A0A024RAU7.41	UPI0000043BED	-	-	1	deleterious(0)	probably_damaging(0.976)	2023-06-15	-	PROSITE_profiles:PS50850,PANTHER:PTHR11388,PANTHER:PTHR11388:SF82,Pfam:PF03137,TIGRFAM:TIGR00805,Superfamily:SSF103473	-	ENST00000256958.3:c.564A>G	ENSP00000256958.2:p.Ile188Met	-	-	-	-	-	-
	12:21178662:C:T	chr12:21178662	T	ENSG00000134538	ENST00000256958	Transcript	missense_variant	672	568	190	P/S	Cca/Tca	COSV57012465	MODERATE	-	1	-	SNV	SLCO1B1	HGNC	HGNC:10959	protein_coding	YES	NM_006446.5	-	1	P1	CCDS8685.1	ENSP00000256958	Q9Y6L6.181	A0A024RAU7.41	UPI0000043BED	-	-	1	deleterious(0)	probably_damaging(0.998)	2023-06-15	-	PROSITE_profiles:PS50850,PANTHER:PTHR11388,PANTHER:PTHR11388:SF82,Pfam:PF03137,TIGRFAM:TIGR00805,Superfamily:SSF103473	-	ENST00000256958.3:c.568C>T	ENSP00000256958.2:p.Pro190Ser	-	-	-	-	-	-
	12:21178663:C:A	chr12:21178663	A	ENSG00000134538	ENST00000256958	Transcript	missense_variant	673	569	190	P/Q	cCa/cAa	rs1300186922	MODERATE	-	1	-	SNV	SLCO1B1	HGNC	HGNC:10959	protein_coding	YES	NM_006446.5	-	1	P1	CCDS8685.1	ENSP00000256958	Q9Y6L6.181	A0A024RAU7.41	UPI0000043BED	-	-	1	deleterious(0)	probably_damaging(1)	2023-06-15	-	PROSITE_profiles:PS50850,PANTHER:PTHR11388,PANTHER:PTHR11388:SF82,Pfam:PF03137,TIGRFAM:TIGR00805,Superfamily:SSF103473	-	ENST00000256958.3:c.569C>A	ENSP00000256958.2:p.Pro190Gln	-	-	-	-	-	-
	12:21178663:C:T	chr12:21178663	T	ENSG00000134538	ENST00000256958	Transcript	missense_variant	673	569	190	P/L	cCa/cTa	rs1300186922	MODERATE	-	1	-	SNV	SLCO1B1	HGNC	HGNC:10959	protein_coding	YES	NM_006446.5	-	1	P1	CCDS8685.1	ENSP00000256958	Q9Y6L6.181	A0A024RAU7.41	UPI0000043BED	-	-	1	deleterious(0)	probably_damaging(0.999)	2023-06-15	-	PROSITE_profiles:PS50850,PANTHER:PTHR11388,PANTHER:PTHR11388:SF82,Pfam:PF03137,TIGRFAM:TIGR00805,Superfamily:SSF103473	-	ENST00000256958.3:c.569C>T	ENSP00000256958.2:p.Pro190Leu	-	-	-	-	-	-
	12:21178664:A:G	chr12:21178664	G	ENSG00000134538	ENST00000256958	Transcript	synonymous_variant	674	570	190	P	ccA/ccG	-	LOW	-	1	-	SNV	SLCO1B1	HGNC	HGNC:10959	protein_coding	YES	NM_006446.5	-	1	P1	CCDS8685.1	ENSP00000256958	Q9Y6L6.181	A0A024RAU7.41	UPI0000043BED	-	-	1	-	-	2023-06-15	-	PROSITE_profiles:PS50850,PANTHER:PTHR11388,PANTHER:PTHR11388:SF82,Pfam:PF03137,TIGRFAM:TIGR00805,Superfamily:SSF103473	-	ENST00000256958.3:c.570A>G	ENSP00000256958.2:p.Pro190%3D	-	-	-	-	-	-
	12:21178664:ATTGGGG:A	chr12:21178665-21178670	-	ENSG00000134538	ENST00000256958	Transcript	inframe_deletion	675-680	571-576	191-192	LG/-	TTGGGG/-	-	MODERATE	-	1	-	deletion	SLCO1B1	HGNC	HGNC:10959	protein_coding	YES	NM_006446.5	-	1	P1	CCDS8685.1	ENSP00000256958	Q9Y6L6.181	A0A024RAU7.41	UPI0000043BED	-	-	1	-	-	2023-06-15	-	PROSITE_profiles:PS50850,PANTHER:PTHR11388,PANTHER:PTHR11388:SF82,Pfam:PF03137,TIGRFAM:TIGR00805,Superfamily:SSF103473	-	ENST00000256958.3:c.571_576del	ENSP00000256958.2:p.Gly192_Leu193del	-	-	-	-	-	-
	12:21178665:T:C	chr12:21178665	C	ENSG00000134538	ENST00000256958	Transcript	synonymous_variant	675	571	191	L	Ttg/Ctg	rs4149057,COSV57008088	LOW	-	1	-	SNV	SLCO1B1	HGNC	HGNC:10959	protein_coding	YES	NM_006446.5	-	1	P1	CCDS8685.1	ENSP00000256958	Q9Y6L6.181	A0A024RAU7.41	UPI0000043BED	-	-	1	-	-	2023-06-15	-	PROSITE_profiles:PS50850,PANTHER:PTHR11388,PANTHER:PTHR11388:SF82,Pfam:PF03137,TIGRFAM:TIGR00805,Superfamily:SSF103473	-	ENST00000256958.3:c.571T>C	ENSP00000256958.2:p.Leu191%3D	-	0.3674	0.1445	0.5043	0.2431	0.6074
	12:21178666:T:C	chr12:21178666	C	ENSG00000134538	ENST00000256958	Transcript	missense_variant	676	572	191	L/S	tTg/tCg	rs772501469	MODERATE	-	1	-	SNV	SLCO1B1	HGNC	HGNC:10959	protein_coding	YES	NM_006446.5	-	1	P1	CCDS8685.1	ENSP00000256958	Q9Y6L6.181	A0A024RAU7.41	UPI0000043BED	-	-	1	deleterious(0)	probably_damaging(1)	2023-06-15	-	PROSITE_profiles:PS50850,PANTHER:PTHR11388,PANTHER:PTHR11388:SF82,Pfam:PF03137,TIGRFAM:TIGR00805,Superfamily:SSF103473	-	ENST00000256958.3:c.572T>C	ENSP00000256958.2:p.Leu191Ser	-	-	-	-	-	-
	12:21178668:G:C	chr12:21178668	C	ENSG00000134538	ENST00000256958	Transcript	missense_variant	678	574	192	G/R	Ggg/Cgg	-	MODERATE	-	1	-	SNV	SLCO1B1	HGNC	HGNC:10959	protein_coding	YES	NM_006446.5	-	1	P1	CCDS8685.1	ENSP00000256958	Q9Y6L6.181	A0A024RAU7.41	UPI0000043BED	-	-	1	deleterious(0)	probably_damaging(1)	2023-06-15	-	PROSITE_profiles:PS50850,PANTHER:PTHR11388,PANTHER:PTHR11388:SF82,Pfam:PF03137,TIGRFAM:TIGR00805,Superfamily:SSF103473	-	ENST00000256958.3:c.574G>C	ENSP00000256958.2:p.Gly192Arg	-	-	-	-	-	-
	12:21178671:C:T	chr12:21178671	T	ENSG00000134538	ENST00000256958	Transcript	missense_variant	681	577	193	L/F	Ctt/Ttt	rs376996580,COSV57010058	MODERATE	-	1	-	SNV	SLCO1B1	HGNC	HGNC:10959	protein_coding	YES	NM_006446.5	-	1	P1	CCDS8685.1	ENSP00000256958	Q9Y6L6.181	A0A024RAU7.41	UPI0000043BED	-	-	1	deleterious(0)	benign(0.099)	2023-06-15	-	PROSITE_profiles:PS50850,PANTHER:PTHR11388,PANTHER:PTHR11388:SF82,Pfam:PF03137,TIGRFAM:TIGR00805,Superfamily:SSF103473	-	ENST00000256958.3:c.577C>T	ENSP00000256958.2:p.Leu193Phe	-	0.0006	0	0	0.002	0
	12:21178671:CTTTCTTACAT:C	chr12:21178672-21178681	-	ENSG00000134538	ENST00000256958	Transcript	frameshift_variant	682-691	578-587	193-196	LSYI/X	cTTTCTTACATt/ct	-	HIGH	-	1	-	deletion	SLCO1B1	HGNC	HGNC:10959	protein_coding	YES	NM_006446.5	-	1	P1	CCDS8685.1	ENSP00000256958	Q9Y6L6.181	A0A024RAU7.41	UPI0000043BED	-	-	1	-	-	2023-06-15	-	PROSITE_profiles:PS50850,PANTHER:PTHR11388,PANTHER:PTHR11388:SF82,Pfam:PF03137,TIGRFAM:TIGR00805,Superfamily:SSF103473	-	ENST00000256958.3:c.579_588del	ENSP00000256958.2:p.Ser194MetfsTer13	1	-	-	-	-	-
	12:21178672:T:G	chr12:21178672	G	ENSG00000134538	ENST00000256958	Transcript	missense_variant	682	578	193	L/R	cTt/cGt	rs72559746,CM087804	MODERATE	-	1	-	SNV	SLCO1B1	HGNC	HGNC:10959	protein_coding	YES	NM_006446.5	-	1	P1	CCDS8685.1	ENSP00000256958	Q9Y6L6.181	A0A024RAU7.41	UPI0000043BED	-	-	1	deleterious(0)	possibly_damaging(0.863)	2023-06-15	-	PROSITE_profiles:PS50850,PANTHER:PTHR11388,PANTHER:PTHR11388:SF82,Pfam:PF03137,TIGRFAM:TIGR00805,Superfamily:SSF103473	-	ENST00000256958.3:c.578T>G	ENSP00000256958.2:p.Leu193Arg	-	-	-	-	-	-
	12:21178677:T:A	chr12:21178677	A	ENSG00000134538	ENST00000256958	Transcript	missense_variant	687	583	195	Y/N	Tac/Aac	-	MODERATE	-	1	-	SNV	SLCO1B1	HGNC	HGNC:10959	protein_coding	YES	NM_006446.5	-	1	P1	CCDS8685.1	ENSP00000256958	Q9Y6L6.181	A0A024RAU7.41	UPI0000043BED	-	-	1	deleterious(0)	probably_damaging(1)	2023-06-15	-	PROSITE_profiles:PS50850,PANTHER:PTHR11388,PANTHER:PTHR11388:SF82,Pfam:PF03137,TIGRFAM:TIGR00805,Superfamily:SSF103473	-	ENST00000256958.3:c.583T>A	ENSP00000256958.2:p.Tyr195Asn	-	-	-	-	-	-
	12:21178679:C:T	chr12:21178679	T	ENSG00000134538	ENST00000256958	Transcript	synonymous_variant	689	585	195	Y	taC/taT	-	LOW	-	1	-	SNV	SLCO1B1	HGNC	HGNC:10959	protein_coding	YES	NM_006446.5	-	1	P1	CCDS8685.1	ENSP00000256958	Q9Y6L6.181	A0A024RAU7.41	UPI0000043BED	-	-	1	-	-	2023-06-15	-	PROSITE_profiles:PS50850,PANTHER:PTHR11388,PANTHER:PTHR11388:SF82,Pfam:PF03137,TIGRFAM:TIGR00805,Superfamily:SSF103473	-	ENST00000256958.3:c.585C>T	ENSP00000256958.2:p.Tyr195%3D	-	-	-	-	-	-
	12:21178680:A:G	chr12:21178680	G	ENSG00000134538	ENST00000256958	Transcript	missense_variant	690	586	196	I/V	Att/Gtt	-	MODERATE	-	1	-	SNV	SLCO1B1	HGNC	HGNC:10959	protein_coding	YES	NM_006446.5	-	1	P1	CCDS8685.1	ENSP00000256958	Q9Y6L6.181	A0A024RAU7.41	UPI0000043BED	-	-	1	deleterious(0.01)	benign(0.204)	2023-06-15	-	PROSITE_profiles:PS50850,PANTHER:PTHR11388,PANTHER:PTHR11388:SF82,Pfam:PF03137,TIGRFAM:TIGR00805,Superfamily:SSF103473	-	ENST00000256958.3:c.586A>G	ENSP00000256958.2:p.Ile196Val	-	-	-	-	-	-
	12:21178681:T:C	chr12:21178681	C	ENSG00000134538	ENST00000256958	Transcript	missense_variant	691	587	196	I/T	aTt/aCt	rs771260030	MODERATE	-	1	-	SNV	SLCO1B1	HGNC	HGNC:10959	protein_coding	YES	NM_006446.5	-	1	P1	CCDS8685.1	ENSP00000256958	Q9Y6L6.181	A0A024RAU7.41	UPI0000043BED	-	-	1	deleterious(0)	possibly_damaging(0.888)	2023-06-15	-	PROSITE_profiles:PS50850,PANTHER:PTHR11388,PANTHER:PTHR11388:SF82,Pfam:PF03137,TIGRFAM:TIGR00805,Superfamily:SSF103473	-	ENST00000256958.3:c.587T>C	ENSP00000256958.2:p.Ile196Thr	-	-	-	-	-	-
	12:21178682:T:C	chr12:21178682	C	ENSG00000134538	ENST00000256958	Transcript	synonymous_variant	692	588	196	I	atT/atC	-	LOW	-	1	-	SNV	SLCO1B1	HGNC	HGNC:10959	protein_coding	YES	NM_006446.5	-	1	P1	CCDS8685.1	ENSP00000256958	Q9Y6L6.181	A0A024RAU7.41	UPI0000043BED	-	-	1	-	-	2023-06-15	-	PROSITE_profiles:PS50850,PANTHER:PTHR11388,PANTHER:PTHR11388:SF82,Pfam:PF03137,TIGRFAM:TIGR00805,Superfamily:SSF103473	-	ENST00000256958.3:c.588T>C	ENSP00000256958.2:p.Ile196%3D	-	-	-	-	-	-
	12:21178683:G:A	chr12:21178683	A	ENSG00000134538	ENST00000256958	Transcript	missense_variant	693	589	197	D/N	Gat/Aat	COSV99918896	MODERATE	-	1	-	SNV	SLCO1B1	HGNC	HGNC:10959	protein_coding	YES	NM_006446.5	-	1	P1	CCDS8685.1	ENSP00000256958	Q9Y6L6.181	A0A024RAU7.41	UPI0000043BED	-	-	1	deleterious(0)	probably_damaging(0.999)	2023-06-15	-	PROSITE_profiles:PS50850,PANTHER:PTHR11388,PANTHER:PTHR11388:SF82,Pfam:PF03137,TIGRFAM:TIGR00805,Superfamily:SSF103473	-	ENST00000256958.3:c.589G>A	ENSP00000256958.2:p.Asp197Asn	-	-	-	-	-	-
	12:21178685:T:C	chr12:21178685	C	ENSG00000134538	ENST00000256958	Transcript	synonymous_variant	695	591	197	D	gaT/gaC	rs148105486	LOW	-	1	-	SNV	SLCO1B1	HGNC	HGNC:10959	protein_coding	YES	NM_006446.5	-	1	P1	CCDS8685.1	ENSP00000256958	Q9Y6L6.181	A0A024RAU7.41	UPI0000043BED	-	-	1	-	-	2023-06-15	-	PROSITE_profiles:PS50850,PANTHER:PTHR11388,PANTHER:PTHR11388:SF82,Pfam:PF03137,TIGRFAM:TIGR00805,Superfamily:SSF103473	-	ENST00000256958.3:c.591T>C	ENSP00000256958.2:p.Asp197%3D	-	-	-	-	-	-
	12:21178687:A:G	chr12:21178687	G	ENSG00000134538	ENST00000256958	Transcript	missense_variant	697	593	198	D/G	gAt/gGt	rs376755211	MODERATE	-	1	-	SNV	SLCO1B1	HGNC	HGNC:10959	protein_coding	YES	NM_006446.5	-	1	P1	CCDS8685.1	ENSP00000256958	Q9Y6L6.181	A0A024RAU7.41	UPI0000043BED	-	-	1	deleterious(0)	probably_damaging(0.998)	2023-06-15	-	PROSITE_profiles:PS50850,PANTHER:PTHR11388,PANTHER:PTHR11388:SF82,Pfam:PF03137,TIGRFAM:TIGR00805,Superfamily:SSF103473	-	ENST00000256958.3:c.593A>G	ENSP00000256958.2:p.Asp198Gly	-	-	-	-	-	-
	12:21178687:A:T	chr12:21178687	T	ENSG00000134538	ENST00000256958	Transcript	missense_variant	697	593	198	D/V	gAt/gTt	-	MODERATE	-	1	-	SNV	SLCO1B1	HGNC	HGNC:10959	protein_coding	YES	NM_006446.5	-	1	P1	CCDS8685.1	ENSP00000256958	Q9Y6L6.181	A0A024RAU7.41	UPI0000043BED	-	-	1	deleterious(0)	probably_damaging(1)	2023-06-15	-	PROSITE_profiles:PS50850,PANTHER:PTHR11388,PANTHER:PTHR11388:SF82,Pfam:PF03137,TIGRFAM:TIGR00805,Superfamily:SSF103473	-	ENST00000256958.3:c.593A>T	ENSP00000256958.2:p.Asp198Val	-	-	-	-	-	-
	12:21178691:C:T	chr12:21178691	T	ENSG00000134538	ENST00000256958	Transcript	synonymous_variant	701	597	199	F	ttC/ttT	rs2291075,COSV57010363	LOW	-	1	-	SNV	SLCO1B1	HGNC	HGNC:10959	protein_coding	YES	NM_006446.5	-	1	P1	CCDS8685.1	ENSP00000256958	Q9Y6L6.181	A0A024RAU7.41	UPI0000043BED	-	-	1	-	-	2023-06-15	-	PROSITE_profiles:PS50850,PANTHER:PTHR11388,PANTHER:PTHR11388:SF82,Pfam:PF03137,TIGRFAM:TIGR00805,Superfamily:SSF103473	-	ENST00000256958.3:c.597C>T	ENSP00000256958.2:p.Phe199%3D	-	0.4155	0.5598	0.3314	0.5109	0.3966
	12:21178692:G:A	chr12:21178692	A	ENSG00000134538	ENST00000256958	Transcript	missense_variant	702	598	200	A/T	Gct/Act	rs540112224	MODERATE	-	1	-	SNV	SLCO1B1	HGNC	HGNC:10959	protein_coding	YES	NM_006446.5	-	1	P1	CCDS8685.1	ENSP00000256958	Q9Y6L6.181	A0A024RAU7.41	UPI0000043BED	-	-	1	deleterious(0)	probably_damaging(0.944)	2023-06-15	-	PROSITE_profiles:PS50850,PANTHER:PTHR11388,PANTHER:PTHR11388:SF82,Pfam:PF03137,TIGRFAM:TIGR00805,Superfamily:SSF103473	-	ENST00000256958.3:c.598G>A	ENSP00000256958.2:p.Ala200Thr	-	0.0002	0	0	0	0
	12:21178693:C:T	chr12:21178693	T	ENSG00000134538	ENST00000256958	Transcript	missense_variant	703	599	200	A/V	gCt/gTt	rs150623527	MODERATE	-	1	-	SNV	SLCO1B1	HGNC	HGNC:10959	protein_coding	YES	NM_006446.5	-	1	P1	CCDS8685.1	ENSP00000256958	Q9Y6L6.181	A0A024RAU7.41	UPI0000043BED	-	-	1	deleterious(0.01)	possibly_damaging(0.85)	2023-06-15	-	PROSITE_profiles:PS50850,PANTHER:PTHR11388,PANTHER:PTHR11388:SF82,Pfam:PF03137,TIGRFAM:TIGR00805,Superfamily:SSF103473	-	ENST00000256958.3:c.599C>T	ENSP00000256958.2:p.Ala200Val	-	-	-	-	-	-
	12:21178695:A:G	chr12:21178695	G	ENSG00000134538	ENST00000256958	Transcript	missense_variant	705	601	201	K/E	Aaa/Gaa	rs556914358	MODERATE	-	1	-	SNV	SLCO1B1	HGNC	HGNC:10959	protein_coding	YES	NM_006446.5	-	1	P1	CCDS8685.1	ENSP00000256958	Q9Y6L6.181	A0A024RAU7.41	UPI0000043BED	-	-	1	tolerated(0.17)	benign(0.071)	2023-06-15	-	PROSITE_profiles:PS50850,PANTHER:PTHR11388,PANTHER:PTHR11388:SF82,Pfam:PF03137,TIGRFAM:TIGR00805,Superfamily:SSF103473	-	ENST00000256958.3:c.601A>G	ENSP00000256958.2:p.Lys201Glu	-	0.0004	0	0	0.001	0
	12:21178695:AAAG:A	chr12:21178696-21178698	-	ENSG00000134538	ENST00000256958	Transcript	inframe_deletion	706-708	602-604	201-202	KE/K	aAAGaa/aaa	rs757066067	MODERATE	-	1	-	deletion	SLCO1B1	HGNC	HGNC:10959	protein_coding	YES	NM_006446.5	-	1	P1	CCDS8685.1	ENSP00000256958	Q9Y6L6.181	A0A024RAU7.41	UPI0000043BED	-	-	1	-	-	2023-06-15	-	PROSITE_profiles:PS50850,PANTHER:PTHR11388,PANTHER:PTHR11388:SF82,Pfam:PF03137,TIGRFAM:TIGR00805,Superfamily:SSF103473	-	ENST00000256958.3:c.605_607del	ENSP00000256958.2:p.Glu202del	3	-	-	-	-	-
	12:21178700:A:G	chr12:21178700	G	ENSG00000134538	ENST00000256958	Transcript	synonymous_variant	710	606	202	E	gaA/gaG	rs369764409,COSV57011291	LOW	-	1	-	SNV	SLCO1B1	HGNC	HGNC:10959	protein_coding	YES	NM_006446.5	-	1	P1	CCDS8685.1	ENSP00000256958	Q9Y6L6.181	A0A024RAU7.41	UPI0000043BED	-	-	1	-	-	2023-06-15	-	PROSITE_profiles:PS50850,PANTHER:PTHR11388,PANTHER:PTHR11388:SF82,Pfam:PF03137,TIGRFAM:TIGR00805,Superfamily:SSF103473	-	ENST00000256958.3:c.606A>G	ENSP00000256958.2:p.Glu202%3D	-	-	-	-	-	-
	12:21178704:C:T	chr12:21178704	T	ENSG00000134538	ENST00000256958	Transcript	missense_variant	714	610	204	H/Y	Cat/Tat	rs767379248	MODERATE	-	1	-	SNV	SLCO1B1	HGNC	HGNC:10959	protein_coding	YES	NM_006446.5	-	1	P1	CCDS8685.1	ENSP00000256958	Q9Y6L6.181	A0A024RAU7.41	UPI0000043BED	-	-	1	deleterious(0.05)	benign(0.03)	2023-06-15	-	PROSITE_profiles:PS50850,PANTHER:PTHR11388,PANTHER:PTHR11388:SF82,Pfam:PF03137,TIGRFAM:TIGR00805,Superfamily:SSF103473	-	ENST00000256958.3:c.610C>T	ENSP00000256958.2:p.His204Tyr	-	-	-	-	-	-
	12:21178707:T:G	chr12:21178707	G	ENSG00000134538	ENST00000256958	Transcript	missense_variant	717	613	205	S/A	Tct/Gct	COSV99917792	MODERATE	-	1	-	SNV	SLCO1B1	HGNC	HGNC:10959	protein_coding	YES	NM_006446.5	-	1	P1	CCDS8685.1	ENSP00000256958	Q9Y6L6.181	A0A024RAU7.41	UPI0000043BED	-	-	1	tolerated(0.23)	benign(0.383)	2023-06-15	-	PROSITE_profiles:PS50850,PANTHER:PTHR11388,PANTHER:PTHR11388:SF82,Pfam:PF03137,TIGRFAM:TIGR00805,Superfamily:SSF103473	-	ENST00000256958.3:c.613T>G	ENSP00000256958.2:p.Ser205Ala	-	-	-	-	-	-
	12:21178708:C:A	chr12:21178708	A	ENSG00000134538	ENST00000256958	Transcript	missense_variant	718	614	205	S/Y	tCt/tAt	rs1441037443	MODERATE	-	1	-	SNV	SLCO1B1	HGNC	HGNC:10959	protein_coding	YES	NM_006446.5	-	1	P1	CCDS8685.1	ENSP00000256958	Q9Y6L6.181	A0A024RAU7.41	UPI0000043BED	-	-	1	deleterious(0)	probably_damaging(0.968)	2023-06-15	-	PROSITE_profiles:PS50850,PANTHER:PTHR11388,PANTHER:PTHR11388:SF82,Pfam:PF03137,TIGRFAM:TIGR00805,Superfamily:SSF103473	-	ENST00000256958.3:c.614C>A	ENSP00000256958.2:p.Ser205Tyr	-	-	-	-	-	-
	12:21178709:T:C	chr12:21178709	C	ENSG00000134538	ENST00000256958	Transcript	synonymous_variant	719	615	205	S	tcT/tcC	rs1292537368,COSV57014377	LOW	-	1	-	SNV	SLCO1B1	HGNC	HGNC:10959	protein_coding	YES	NM_006446.5	-	1	P1	CCDS8685.1	ENSP00000256958	Q9Y6L6.181	A0A024RAU7.41	UPI0000043BED	-	-	1	-	-	2023-06-15	-	PROSITE_profiles:PS50850,PANTHER:PTHR11388,PANTHER:PTHR11388:SF82,Pfam:PF03137,TIGRFAM:TIGR00805,Superfamily:SSF103473	-	ENST00000256958.3:c.615T>C	ENSP00000256958.2:p.Ser205%3D	-	-	-	-	-	-
	12:21178713:T:C	chr12:21178713	C	ENSG00000134538	ENST00000256958	Transcript	synonymous_variant	723	619	207	L	Ttg/Ctg	-	LOW	-	1	-	SNV	SLCO1B1	HGNC	HGNC:10959	protein_coding	YES	NM_006446.5	-	1	P1	CCDS8685.1	ENSP00000256958	Q9Y6L6.181	A0A024RAU7.41	UPI0000043BED	-	-	1	-	-	2023-06-15	-	PROSITE_profiles:PS50850,PANTHER:PTHR11388,PANTHER:PTHR11388:SF82,Pfam:PF03137,TIGRFAM:TIGR00805,Superfamily:SSF103473	-	ENST00000256958.3:c.619T>C	ENSP00000256958.2:p.Leu207%3D	-	-	-	-	-	-
	12:21178716:T:C	chr12:21178716	C	ENSG00000134538	ENST00000256958	Transcript	missense_variant	726	622	208	Y/H	Tat/Cat	-	MODERATE	-	1	-	SNV	SLCO1B1	HGNC	HGNC:10959	protein_coding	YES	NM_006446.5	-	1	P1	CCDS8685.1	ENSP00000256958	Q9Y6L6.181	A0A024RAU7.41	UPI0000043BED	-	-	1	deleterious(0.04)	possibly_damaging(0.874)	2023-06-15	-	Transmembrane_helices:TMhelix,PROSITE_profiles:PS50850,PANTHER:PTHR11388,PANTHER:PTHR11388:SF82,Pfam:PF03137,TIGRFAM:TIGR00805,Superfamily:SSF103473	-	ENST00000256958.3:c.622T>C	ENSP00000256958.2:p.Tyr208His	-	-	-	-	-	-
	12:21178718:T:C	chr12:21178718	C	ENSG00000134538	ENST00000256958	Transcript	synonymous_variant	728	624	208	Y	taT/taC	rs760395666	LOW	-	1	-	SNV	SLCO1B1	HGNC	HGNC:10959	protein_coding	YES	NM_006446.5	-	1	P1	CCDS8685.1	ENSP00000256958	Q9Y6L6.181	A0A024RAU7.41	UPI0000043BED	-	-	1	-	-	2023-06-15	-	Transmembrane_helices:TMhelix,PROSITE_profiles:PS50850,PANTHER:PTHR11388,PANTHER:PTHR11388:SF82,Pfam:PF03137,TIGRFAM:TIGR00805,Superfamily:SSF103473	-	ENST00000256958.3:c.624T>C	ENSP00000256958.2:p.Tyr208%3D	-	-	-	-	-	-
	12:21178720:T:C	chr12:21178720	C	ENSG00000134538	ENST00000256958	Transcript	missense_variant,splice_region_variant	730	626	209	L/S	tTa/tCa	-	MODERATE	-	1	-	SNV	SLCO1B1	HGNC	HGNC:10959	protein_coding	YES	NM_006446.5	-	1	P1	CCDS8685.1	ENSP00000256958	Q9Y6L6.181	A0A024RAU7.41	UPI0000043BED	-	-	1	deleterious(0)	possibly_damaging(0.756)	2023-06-15	-	Transmembrane_helices:TMhelix,PROSITE_profiles:PS50850,PANTHER:PTHR11388,PANTHER:PTHR11388:SF82,Pfam:PF03137,TIGRFAM:TIGR00805,Superfamily:SSF103473	-	ENST00000256958.3:c.626T>C	ENSP00000256958.2:p.Leu209Ser	-	-	-	-	-	-
	12:21178722:G:A	chr12:21178722	A	ENSG00000134538	ENST00000256958	Transcript	missense_variant,splice_region_variant	732	628	210	G/S	Ggt/Agt	-	MODERATE	-	1	-	SNV	SLCO1B1	HGNC	HGNC:10959	protein_coding	YES	NM_006446.5	-	1	P1	CCDS8685.1	ENSP00000256958	Q9Y6L6.181	A0A024RAU7.41	UPI0000043BED	-	-	1	deleterious(0.01)	probably_damaging(0.994)	2023-06-15	-	Transmembrane_helices:TMhelix,PROSITE_profiles:PS50850,PANTHER:PTHR11388,PANTHER:PTHR11388:SF82,Pfam:PF03137,TIGRFAM:TIGR00805,Superfamily:SSF103473	-	ENST00000256958.3:c.628G>A	ENSP00000256958.2:p.Gly210Ser	-	-	-	-	-	-
	12:21178729:T:C	chr12:21178729	C	ENSG00000134538	ENST00000256958	Transcript	splice_region_variant,intron_variant	-	-	-	-	-	rs200268889	LOW	-	1	-	SNV	SLCO1B1	HGNC	HGNC:10959	protein_coding	YES	NM_006446.5	-	1	P1	CCDS8685.1	ENSP00000256958	Q9Y6L6.181	A0A024RAU7.41	UPI0000043BED	-	-	1	-	-	-	2023-06-14	-	-	ENST00000256958.3:c.628+7T>C	-	-	-	-	-	-	-
	12:21178738:T:C	chr12:21178738	C	ENSG00000134538	ENST00000256958	Transcript	intron_variant	-	-	-	-	-	rs1266295746	MODIFIER	-	1	-	SNV	SLCO1B1	HGNC	HGNC:10959	protein_coding	YES	NM_006446.5	-	1	P1	CCDS8685.1	ENSP00000256958	Q9Y6L6.181	A0A024RAU7.41	UPI0000043BED	-	-	1	-	-	-	2023-06-14	-	-	ENST00000256958.3:c.628+16T>C	-	-	-	-	-	-	-
	12:21178739:A:G	chr12:21178739	G	ENSG00000134538	ENST00000256958	Transcript	intron_variant	-	-	-	-	-	rs1227022140	MODIFIER	-	1	-	SNV	SLCO1B1	HGNC	HGNC:10959	protein_coding	YES	NM_006446.5	-	1	P1	CCDS8685.1	ENSP00000256958	Q9Y6L6.181	A0A024RAU7.41	UPI0000043BED	-	-	1	-	-	-	2023-06-14	-	-	ENST00000256958.3:c.628+17A>G	-	-	-	-	-	-	-
	12:21178740:T:C	chr12:21178740	C	ENSG00000134538	ENST00000256958	Transcript	intron_variant	-	-	-	-	-	rs779251010	MODIFIER	-	1	-	SNV	SLCO1B1	HGNC	HGNC:10959	protein_coding	YES	NM_006446.5	-	1	P1	CCDS8685.1	ENSP00000256958	Q9Y6L6.181	A0A024RAU7.41	UPI0000043BED	-	-	1	-	-	-	2023-06-14	-	-	ENST00000256958.3:c.628+18T>C	-	-	-	-	-	-	-
	12:21178740:T:G	chr12:21178740	G	ENSG00000134538	ENST00000256958	Transcript	intron_variant	-	-	-	-	-	-	MODIFIER	-	1	-	SNV	SLCO1B1	HGNC	HGNC:10959	protein_coding	YES	NM_006446.5	-	1	P1	CCDS8685.1	ENSP00000256958	Q9Y6L6.181	A0A024RAU7.41	UPI0000043BED	-	-	1	-	-	-	2023-06-14	-	-	ENST00000256958.3:c.628+18T>G	-	-	-	-	-	-	-
	12:21178743:A:C	chr12:21178743	C	ENSG00000134538	ENST00000256958	Transcript	intron_variant	-	-	-	-	-	-	MODIFIER	-	1	-	SNV	SLCO1B1	HGNC	HGNC:10959	protein_coding	YES	NM_006446.5	-	1	P1	CCDS8685.1	ENSP00000256958	Q9Y6L6.181	A0A024RAU7.41	UPI0000043BED	-	-	1	-	-	-	2023-06-14	-	-	ENST00000256958.3:c.628+21A>C	-	-	-	-	-	-	-
	12:21178749:A:G	chr12:21178749	G	ENSG00000134538	ENST00000256958	Transcript	intron_variant	-	-	-	-	-	-	MODIFIER	-	1	-	SNV	SLCO1B1	HGNC	HGNC:10959	protein_coding	YES	NM_006446.5	-	1	P1	CCDS8685.1	ENSP00000256958	Q9Y6L6.181	A0A024RAU7.41	UPI0000043BED	-	-	1	-	-	-	2023-06-14	-	-	ENST00000256958.3:c.628+27A>G	-	-	-	-	-	-	-
	12:21178750:T:G	chr12:21178750	G	ENSG00000134538	ENST00000256958	Transcript	intron_variant	-	-	-	-	-	rs752844491	MODIFIER	-	1	-	SNV	SLCO1B1	HGNC	HGNC:10959	protein_coding	YES	NM_006446.5	-	1	P1	CCDS8685.1	ENSP00000256958	Q9Y6L6.181	A0A024RAU7.41	UPI0000043BED	-	-	1	-	-	-	2023-06-14	-	-	ENST00000256958.3:c.628+28T>G	-	-	-	-	-	-	-
	12:21178755:ACTTTCC:A	chr12:21178756-21178761	-	ENSG00000134538	ENST00000256958	Transcript	intron_variant	-	-	-	-	-	-	MODIFIER	-	1	-	deletion	SLCO1B1	HGNC	HGNC:10959	protein_coding	YES	NM_006446.5	-	1	P1	CCDS8685.1	ENSP00000256958	Q9Y6L6.181	A0A024RAU7.41	UPI0000043BED	-	-	1	-	-	-	2023-06-14	-	-	ENST00000256958.3:c.628+38_628+43del	-	-	-	-	-	-	-
	12:21178756:C:T	chr12:21178756	T	ENSG00000134538	ENST00000256958	Transcript	intron_variant	-	-	-	-	-	rs373885261	MODIFIER	-	1	-	SNV	SLCO1B1	HGNC	HGNC:10959	protein_coding	YES	NM_006446.5	-	1	P1	CCDS8685.1	ENSP00000256958	Q9Y6L6.181	A0A024RAU7.41	UPI0000043BED	-	-	1	-	-	-	2023-06-14	-	-	ENST00000256958.3:c.628+34C>T	-	-	-	-	-	-	-
	12:21178756:CT:C	chr12:21178757	-	ENSG00000134538	ENST00000256958	Transcript	intron_variant	-	-	-	-	-	rs778503729	MODIFIER	-	1	-	deletion	SLCO1B1	HGNC	HGNC:10959	protein_coding	YES	NM_006446.5	-	1	P1	CCDS8685.1	ENSP00000256958	Q9Y6L6.181	A0A024RAU7.41	UPI0000043BED	-	-	1	-	-	-	2023-06-14	-	-	ENST00000256958.3:c.628+37del	-	-	-	-	-	-	-
	12:21178757:T:C	chr12:21178757	C	ENSG00000134538	ENST00000256958	Transcript	intron_variant	-	-	-	-	-	-	MODIFIER	-	1	-	SNV	SLCO1B1	HGNC	HGNC:10959	protein_coding	YES	NM_006446.5	-	1	P1	CCDS8685.1	ENSP00000256958	Q9Y6L6.181	A0A024RAU7.41	UPI0000043BED	-	-	1	-	-	-	2023-06-14	-	-	ENST00000256958.3:c.628+35T>C	-	-	-	-	-	-	-
	12:21178762:C:G	chr12:21178762	G	ENSG00000134538	ENST00000256958	Transcript	intron_variant	-	-	-	-	-	-	MODIFIER	-	1	-	SNV	SLCO1B1	HGNC	HGNC:10959	protein_coding	YES	NM_006446.5	-	1	P1	CCDS8685.1	ENSP00000256958	Q9Y6L6.181	A0A024RAU7.41	UPI0000043BED	-	-	1	-	-	-	2023-06-14	-	-	ENST00000256958.3:c.628+40C>G	-	-	-	-	-	-	-
	12:21178762:CTT:C	chr12:21178763-21178764	-	ENSG00000134538	ENST00000256958	Transcript	intron_variant	-	-	-	-	-	rs955892095	MODIFIER	-	1	-	deletion	SLCO1B1	HGNC	HGNC:10959	protein_coding	YES	NM_006446.5	-	1	P1	CCDS8685.1	ENSP00000256958	Q9Y6L6.181	A0A024RAU7.41	UPI0000043BED	-	-	1	-	-	-	2023-06-14	-	-	ENST00000256958.3:c.628+42_628+43del	-	-	-	-	-	-	-
	12:21178770:A:C	chr12:21178770	C	ENSG00000134538	ENST00000256958	Transcript	intron_variant	-	-	-	-	-	-	MODIFIER	-	1	-	SNV	SLCO1B1	HGNC	HGNC:10959	protein_coding	YES	NM_006446.5	-	1	P1	CCDS8685.1	ENSP00000256958	Q9Y6L6.181	A0A024RAU7.41	UPI0000043BED	-	-	1	-	-	-	2023-06-14	-	-	ENST00000256958.3:c.628+48A>C	-	-	-	-	-	-	-
	12:21178770:A:G	chr12:21178770	G	ENSG00000134538	ENST00000256958	Transcript	intron_variant	-	-	-	-	-	rs781602745	MODIFIER	-	1	-	SNV	SLCO1B1	HGNC	HGNC:10959	protein_coding	YES	NM_006446.5	-	1	P1	CCDS8685.1	ENSP00000256958	Q9Y6L6.181	A0A024RAU7.41	UPI0000043BED	-	-	1	-	-	-	2023-06-14	-	-	ENST00000256958.3:c.628+48A>G	-	-	-	-	-	-	-
	12:21178772:T:TA	chr12:21178772-21178773	A	ENSG00000134538	ENST00000256958	Transcript	intron_variant	-	-	-	-	-	-	MODIFIER	-	1	-	insertion	SLCO1B1	HGNC	HGNC:10959	protein_coding	YES	NM_006446.5	-	1	P1	CCDS8685.1	ENSP00000256958	Q9Y6L6.181	A0A024RAU7.41	UPI0000043BED	-	-	1	-	-	-	2023-06-14	-	-	ENST00000256958.3:c.628+50_628+51insA	-	-	-	-	-	-	-
	12:21178776:G:C	chr12:21178776	C	ENSG00000134538	ENST00000256958	Transcript	intron_variant	-	-	-	-	-	-	MODIFIER	-	1	-	SNV	SLCO1B1	HGNC	HGNC:10959	protein_coding	YES	NM_006446.5	-	1	P1	CCDS8685.1	ENSP00000256958	Q9Y6L6.181	A0A024RAU7.41	UPI0000043BED	-	-	1	-	-	-	2023-06-14	-	-	ENST00000256958.3:c.628+54G>C	-	-	-	-	-	-	-
	12:21178779:A:G	chr12:21178779	G	ENSG00000134538	ENST00000256958	Transcript	intron_variant	-	-	-	-	-	-	MODIFIER	-	1	-	SNV	SLCO1B1	HGNC	HGNC:10959	protein_coding	YES	NM_006446.5	-	1	P1	CCDS8685.1	ENSP00000256958	Q9Y6L6.181	A0A024RAU7.41	UPI0000043BED	-	-	1	-	-	-	2023-06-14	-	-	ENST00000256958.3:c.628+57A>G	-	-	-	-	-	-	-
	12:21178779:ATAG:A	chr12:21178780-21178782	-	ENSG00000134538	ENST00000256958	Transcript	intron_variant	-	-	-	-	-	-	MODIFIER	-	1	-	deletion	SLCO1B1	HGNC	HGNC:10959	protein_coding	YES	NM_006446.5	-	1	P1	CCDS8685.1	ENSP00000256958	Q9Y6L6.181	A0A024RAU7.41	UPI0000043BED	-	-	1	-	-	-	2023-06-14	-	-	ENST00000256958.3:c.628+61_628+63del	-	-	-	-	-	-	-
	12:21178782:G:C	chr12:21178782	C	ENSG00000134538	ENST00000256958	Transcript	intron_variant	-	-	-	-	-	rs576844894	MODIFIER	-	1	-	SNV	SLCO1B1	HGNC	HGNC:10959	protein_coding	YES	NM_006446.5	-	1	P1	CCDS8685.1	ENSP00000256958	Q9Y6L6.181	A0A024RAU7.41	UPI0000043BED	-	-	1	-	-	-	2023-06-14	-	-	ENST00000256958.3:c.628+60G>C	-	-	0.0046	0	0	0.001	0
	12:21178784:A:G	chr12:21178784	G	ENSG00000134538	ENST00000256958	Transcript	intron_variant	-	-	-	-	-	-	MODIFIER	-	1	-	SNV	SLCO1B1	HGNC	HGNC:10959	protein_coding	YES	NM_006446.5	-	1	P1	CCDS8685.1	ENSP00000256958	Q9Y6L6.181	A0A024RAU7.41	UPI0000043BED	-	-	1	-	-	-	2023-06-14	-	-	ENST00000256958.3:c.628+62A>G	-	-	-	-	-	-	-
	12:21178784:A:T	chr12:21178784	T	ENSG00000134538	ENST00000256958	Transcript	intron_variant	-	-	-	-	-	-	MODIFIER	-	1	-	SNV	SLCO1B1	HGNC	HGNC:10959	protein_coding	YES	NM_006446.5	-	1	P1	CCDS8685.1	ENSP00000256958	Q9Y6L6.181	A0A024RAU7.41	UPI0000043BED	-	-	1	-	-	-	2023-06-14	-	-	ENST00000256958.3:c.628+62A>T	-	-	-	-	-	-	-
	12:21178786:A:G	chr12:21178786	G	ENSG00000134538	ENST00000256958	Transcript	intron_variant	-	-	-	-	-	-	MODIFIER	-	1	-	SNV	SLCO1B1	HGNC	HGNC:10959	protein_coding	YES	NM_006446.5	-	1	P1	CCDS8685.1	ENSP00000256958	Q9Y6L6.181	A0A024RAU7.41	UPI0000043BED	-	-	1	-	-	-	2023-06-14	-	-	ENST00000256958.3:c.628+64A>G	-	-	-	-	-	-	-
	12:21178788:T:A	chr12:21178788	A	ENSG00000134538	ENST00000256958	Transcript	intron_variant	-	-	-	-	-	-	MODIFIER	-	1	-	SNV	SLCO1B1	HGNC	HGNC:10959	protein_coding	YES	NM_006446.5	-	1	P1	CCDS8685.1	ENSP00000256958	Q9Y6L6.181	A0A024RAU7.41	UPI0000043BED	-	-	1	-	-	-	2023-06-14	-	-	ENST00000256958.3:c.628+66T>A	-	-	-	-	-	-	-
	12:21178793:AAACTT:A	chr12:21178794-21178798	-	ENSG00000134538	ENST00000256958	Transcript	intron_variant	-	-	-	-	-	-	MODIFIER	-	1	-	deletion	SLCO1B1	HGNC	HGNC:10959	protein_coding	YES	NM_006446.5	-	1	P1	CCDS8685.1	ENSP00000256958	Q9Y6L6.181	A0A024RAU7.41	UPI0000043BED	-	-	1	-	-	-	2023-06-14	-	-	ENST00000256958.3:c.628+73_628+77del	-	-	-	-	-	-	-
	12:21178796:CTTATTATT:C	chr12:21178797-21178804	-	ENSG00000134538	ENST00000256958	Transcript	intron_variant	-	-	-	-	-	-	MODIFIER	-	1	-	deletion	SLCO1B1	HGNC	HGNC:10959	protein_coding	YES	NM_006446.5	-	1	P1	CCDS8685.1	ENSP00000256958	Q9Y6L6.181	A0A024RAU7.41	UPI0000043BED	-	-	1	-	-	-	2023-06-14	-	-	ENST00000256958.3:c.628+78_628+85del	-	-	-	-	-	-	-
	12:21178807:ACCTATTAGAACATATATTTGGG:A	chr12:21178808-21178829	-	ENSG00000134538	ENST00000256958	Transcript	intron_variant	-	-	-	-	-	-	MODIFIER	-	1	-	deletion	SLCO1B1	HGNC	HGNC:10959	protein_coding	YES	NM_006446.5	-	1	P1	CCDS8685.1	ENSP00000256958	Q9Y6L6.181	A0A024RAU7.41	UPI0000043BED	-	-	1	-	-	-	2023-06-14	-	-	ENST00000256958.3:c.628+86_629-93del	-	-	-	-	-	-	-
	12:21178809:C:G	chr12:21178809	G	ENSG00000134538	ENST00000256958	Transcript	intron_variant	-	-	-	-	-	rs1432077217	MODIFIER	-	1	-	SNV	SLCO1B1	HGNC	HGNC:10959	protein_coding	YES	NM_006446.5	-	1	P1	CCDS8685.1	ENSP00000256958	Q9Y6L6.181	A0A024RAU7.41	UPI0000043BED	-	-	1	-	-	-	2023-06-14	-	-	ENST00000256958.3:c.628+87C>G	-	-	-	-	-	-	-
	12:21178811:A:G	chr12:21178811	G	ENSG00000134538	ENST00000256958	Transcript	intron_variant	-	-	-	-	-	rs1029396511	MODIFIER	-	1	-	SNV	SLCO1B1	HGNC	HGNC:10959	protein_coding	YES	NM_006446.5	-	1	P1	CCDS8685.1	ENSP00000256958	Q9Y6L6.181	A0A024RAU7.41	UPI0000043BED	-	-	1	-	-	-	2023-06-14	-	-	ENST00000256958.3:c.628+89A>G	-	-	-	-	-	-	-
	12:21178813:T:G	chr12:21178813	G	ENSG00000134538	ENST00000256958	Transcript	intron_variant	-	-	-	-	-	-	MODIFIER	-	1	-	SNV	SLCO1B1	HGNC	HGNC:10959	protein_coding	YES	NM_006446.5	-	1	P1	CCDS8685.1	ENSP00000256958	Q9Y6L6.181	A0A024RAU7.41	UPI0000043BED	-	-	1	-	-	-	2023-06-14	-	-	ENST00000256958.3:c.628+91T>G	-	-	-	-	-	-	-
	12:21178817:A:C	chr12:21178817	C	ENSG00000134538	ENST00000256958	Transcript	intron_variant	-	-	-	-	-	-	MODIFIER	-	1	-	SNV	SLCO1B1	HGNC	HGNC:10959	protein_coding	YES	NM_006446.5	-	1	P1	CCDS8685.1	ENSP00000256958	Q9Y6L6.181	A0A024RAU7.41	UPI0000043BED	-	-	1	-	-	-	2023-06-14	-	-	ENST00000256958.3:c.628+95A>C	-	-	-	-	-	-	-
	12:21178818:C:G	chr12:21178818	G	ENSG00000134538	ENST00000256958	Transcript	intron_variant	-	-	-	-	-	-	MODIFIER	-	1	-	SNV	SLCO1B1	HGNC	HGNC:10959	protein_coding	YES	NM_006446.5	-	1	P1	CCDS8685.1	ENSP00000256958	Q9Y6L6.181	A0A024RAU7.41	UPI0000043BED	-	-	1	-	-	-	2023-06-14	-	-	ENST00000256958.3:c.628+96C>G	-	-	-	-	-	-	-
	12:21178819:A:G	chr12:21178819	G	ENSG00000134538	ENST00000256958	Transcript	intron_variant	-	-	-	-	-	-	MODIFIER	-	1	-	SNV	SLCO1B1	HGNC	HGNC:10959	protein_coding	YES	NM_006446.5	-	1	P1	CCDS8685.1	ENSP00000256958	Q9Y6L6.181	A0A024RAU7.41	UPI0000043BED	-	-	1	-	-	-	2023-06-14	-	-	ENST00000256958.3:c.628+97A>G	-	-	-	-	-	-	-
	12:21178821:A:T	chr12:21178821	T	ENSG00000134538	ENST00000256958	Transcript	intron_variant	-	-	-	-	-	-	MODIFIER	-	1	-	SNV	SLCO1B1	HGNC	HGNC:10959	protein_coding	YES	NM_006446.5	-	1	P1	CCDS8685.1	ENSP00000256958	Q9Y6L6.181	A0A024RAU7.41	UPI0000043BED	-	-	1	-	-	-	2023-06-14	-	-	ENST00000256958.3:c.628+99A>T	-	-	-	-	-	-	-
	12:21178824:T:C	chr12:21178824	C	ENSG00000134538	ENST00000256958	Transcript	intron_variant	-	-	-	-	-	rs192182120	MODIFIER	-	1	-	SNV	SLCO1B1	HGNC	HGNC:10959	protein_coding	YES	NM_006446.5	-	1	P1	CCDS8685.1	ENSP00000256958	Q9Y6L6.181	A0A024RAU7.41	UPI0000043BED	-	-	1	-	-	-	2023-06-14	-	-	ENST00000256958.3:c.629-98T>C	-	-	0.0006	0.0023	0	0	0
	12:21178828:G:C	chr12:21178828	C	ENSG00000134538	ENST00000256958	Transcript	intron_variant	-	-	-	-	-	-	MODIFIER	-	1	-	SNV	SLCO1B1	HGNC	HGNC:10959	protein_coding	YES	NM_006446.5	-	1	P1	CCDS8685.1	ENSP00000256958	Q9Y6L6.181	A0A024RAU7.41	UPI0000043BED	-	-	1	-	-	-	2023-06-14	-	-	ENST00000256958.3:c.629-94G>C	-	-	-	-	-	-	-
	12:21178829:G:C	chr12:21178829	C	ENSG00000134538	ENST00000256958	Transcript	intron_variant	-	-	-	-	-	-	MODIFIER	-	1	-	SNV	SLCO1B1	HGNC	HGNC:10959	protein_coding	YES	NM_006446.5	-	1	P1	CCDS8685.1	ENSP00000256958	Q9Y6L6.181	A0A024RAU7.41	UPI0000043BED	-	-	1	-	-	-	2023-06-14	-	-	ENST00000256958.3:c.629-93G>C	-	-	-	-	-	-	-
	12:21178831:A:G	chr12:21178831	G	ENSG00000134538	ENST00000256958	Transcript	intron_variant	-	-	-	-	-	rs910853009	MODIFIER	-	1	-	SNV	SLCO1B1	HGNC	HGNC:10959	protein_coding	YES	NM_006446.5	-	1	P1	CCDS8685.1	ENSP00000256958	Q9Y6L6.181	A0A024RAU7.41	UPI0000043BED	-	-	1	-	-	-	2023-06-14	-	-	ENST00000256958.3:c.629-91A>G	-	-	-	-	-	-	-
	12:21178833:A:G	chr12:21178833	G	ENSG00000134538	ENST00000256958	Transcript	intron_variant	-	-	-	-	-	-	MODIFIER	-	1	-	SNV	SLCO1B1	HGNC	HGNC:10959	protein_coding	YES	NM_006446.5	-	1	P1	CCDS8685.1	ENSP00000256958	Q9Y6L6.181	A0A024RAU7.41	UPI0000043BED	-	-	1	-	-	-	2023-06-14	-	-	ENST00000256958.3:c.629-89A>G	-	-	-	-	-	-	-
	12:21178836:T:C	chr12:21178836	C	ENSG00000134538	ENST00000256958	Transcript	intron_variant	-	-	-	-	-	-	MODIFIER	-	1	-	SNV	SLCO1B1	HGNC	HGNC:10959	protein_coding	YES	NM_006446.5	-	1	P1	CCDS8685.1	ENSP00000256958	Q9Y6L6.181	A0A024RAU7.41	UPI0000043BED	-	-	1	-	-	-	2023-06-14	-	-	ENST00000256958.3:c.629-86T>C	-	-	-	-	-	-	-
	12:21178840:G:A	chr12:21178840	A	ENSG00000134538	ENST00000256958	Transcript	intron_variant	-	-	-	-	-	rs555117257	MODIFIER	-	1	-	SNV	SLCO1B1	HGNC	HGNC:10959	protein_coding	YES	NM_006446.5	-	1	P1	CCDS8685.1	ENSP00000256958	Q9Y6L6.181	A0A024RAU7.41	UPI0000043BED	-	-	1	-	-	-	2023-06-14	-	-	ENST00000256958.3:c.629-82G>A	-	-	0.0002	0	0	0	0.001
	12:21178845:A:G	chr12:21178845	G	ENSG00000134538	ENST00000256958	Transcript	intron_variant	-	-	-	-	-	rs1253574126	MODIFIER	-	1	-	SNV	SLCO1B1	HGNC	HGNC:10959	protein_coding	YES	NM_006446.5	-	1	P1	CCDS8685.1	ENSP00000256958	Q9Y6L6.181	A0A024RAU7.41	UPI0000043BED	-	-	1	-	-	-	2023-06-14	-	-	ENST00000256958.3:c.629-77A>G	-	-	-	-	-	-	-
	12:21178852:T:C	chr12:21178852	C	ENSG00000134538	ENST00000256958	Transcript	intron_variant	-	-	-	-	-	-	MODIFIER	-	1	-	SNV	SLCO1B1	HGNC	HGNC:10959	protein_coding	YES	NM_006446.5	-	1	P1	CCDS8685.1	ENSP00000256958	Q9Y6L6.181	A0A024RAU7.41	UPI0000043BED	-	-	1	-	-	-	2023-06-14	-	-	ENST00000256958.3:c.629-70T>C	-	-	-	-	-	-	-
	12:21178861:C:T	chr12:21178861	T	ENSG00000134538	ENST00000256958	Transcript	intron_variant	-	-	-	-	-	rs1452778640	MODIFIER	-	1	-	SNV	SLCO1B1	HGNC	HGNC:10959	protein_coding	YES	NM_006446.5	-	1	P1	CCDS8685.1	ENSP00000256958	Q9Y6L6.181	A0A024RAU7.41	UPI0000043BED	-	-	1	-	-	-	2023-06-14	-	-	ENST00000256958.3:c.629-61C>T	-	-	-	-	-	-	-
	12:21178862:A:G	chr12:21178862	G	ENSG00000134538	ENST00000256958	Transcript	intron_variant	-	-	-	-	-	-	MODIFIER	-	1	-	SNV	SLCO1B1	HGNC	HGNC:10959	protein_coding	YES	NM_006446.5	-	1	P1	CCDS8685.1	ENSP00000256958	Q9Y6L6.181	A0A024RAU7.41	UPI0000043BED	-	-	1	-	-	-	2023-06-14	-	-	ENST00000256958.3:c.629-60A>G	-	-	-	-	-	-	-
	12:21178864:G:A	chr12:21178864	A	ENSG00000134538	ENST00000256958	Transcript	intron_variant	-	-	-	-	-	rs1322913904	MODIFIER	-	1	-	SNV	SLCO1B1	HGNC	HGNC:10959	protein_coding	YES	NM_006446.5	-	1	P1	CCDS8685.1	ENSP00000256958	Q9Y6L6.181	A0A024RAU7.41	UPI0000043BED	-	-	1	-	-	-	2023-06-14	-	-	ENST00000256958.3:c.629-58G>A	-	-	-	-	-	-	-
	12:21178865:G:T	chr12:21178865	T	ENSG00000134538	ENST00000256958	Transcript	intron_variant	-	-	-	-	-	-	MODIFIER	-	1	-	SNV	SLCO1B1	HGNC	HGNC:10959	protein_coding	YES	NM_006446.5	-	1	P1	CCDS8685.1	ENSP00000256958	Q9Y6L6.181	A0A024RAU7.41	UPI0000043BED	-	-	1	-	-	-	2023-06-14	-	-	ENST00000256958.3:c.629-57G>T	-	-	-	-	-	-	-
	12:21178867:G:A	chr12:21178867	A	ENSG00000134538	ENST00000256958	Transcript	intron_variant	-	-	-	-	-	rs767219429	MODIFIER	-	1	-	SNV	SLCO1B1	HGNC	HGNC:10959	protein_coding	YES	NM_006446.5	-	1	P1	CCDS8685.1	ENSP00000256958	Q9Y6L6.181	A0A024RAU7.41	UPI0000043BED	-	-	1	-	-	-	2023-06-14	-	-	ENST00000256958.3:c.629-55G>A	-	-	-	-	-	-	-
	12:21178869:A:T	chr12:21178869	T	ENSG00000134538	ENST00000256958	Transcript	intron_variant	-	-	-	-	-	-	MODIFIER	-	1	-	SNV	SLCO1B1	HGNC	HGNC:10959	protein_coding	YES	NM_006446.5	-	1	P1	CCDS8685.1	ENSP00000256958	Q9Y6L6.181	A0A024RAU7.41	UPI0000043BED	-	-	1	-	-	-	2023-06-14	-	-	ENST00000256958.3:c.629-53A>T	-	-	-	-	-	-	-
	12:21178873:G:C	chr12:21178873	C	ENSG00000134538	ENST00000256958	Transcript	intron_variant	-	-	-	-	-	rs746201862	MODIFIER	-	1	-	SNV	SLCO1B1	HGNC	HGNC:10959	protein_coding	YES	NM_006446.5	-	1	P1	CCDS8685.1	ENSP00000256958	Q9Y6L6.181	A0A024RAU7.41	UPI0000043BED	-	-	1	-	-	-	2023-06-14	-	-	ENST00000256958.3:c.629-49G>C	-	-	-	-	-	-	-
	12:21178876:C:A	chr12:21178876	A	ENSG00000134538	ENST00000256958	Transcript	intron_variant	-	-	-	-	-	rs1163515241	MODIFIER	-	1	-	SNV	SLCO1B1	HGNC	HGNC:10959	protein_coding	YES	NM_006446.5	-	1	P1	CCDS8685.1	ENSP00000256958	Q9Y6L6.181	A0A024RAU7.41	UPI0000043BED	-	-	1	-	-	-	2023-06-14	-	-	ENST00000256958.3:c.629-46C>A	-	-	-	-	-	-	-
	12:21178877:C:A	chr12:21178877	A	ENSG00000134538	ENST00000256958	Transcript	intron_variant	-	-	-	-	-	rs1347741205	MODIFIER	-	1	-	SNV	SLCO1B1	HGNC	HGNC:10959	protein_coding	YES	NM_006446.5	-	1	P1	CCDS8685.1	ENSP00000256958	Q9Y6L6.181	A0A024RAU7.41	UPI0000043BED	-	-	1	-	-	-	2023-06-14	-	-	ENST00000256958.3:c.629-45C>A	-	-	-	-	-	-	-
	12:21178878:A:G	chr12:21178878	G	ENSG00000134538	ENST00000256958	Transcript	intron_variant	-	-	-	-	-	rs369275644	MODIFIER	-	1	-	SNV	SLCO1B1	HGNC	HGNC:10959	protein_coding	YES	NM_006446.5	-	1	P1	CCDS8685.1	ENSP00000256958	Q9Y6L6.181	A0A024RAU7.41	UPI0000043BED	-	-	1	-	-	-	2023-06-14	-	-	ENST00000256958.3:c.629-44A>G	-	-	0.0002	0.0008	0	0	0
	12:21178880:G:A	chr12:21178880	A	ENSG00000134538	ENST00000256958	Transcript	intron_variant	-	-	-	-	-	rs1343245958	MODIFIER	-	1	-	SNV	SLCO1B1	HGNC	HGNC:10959	protein_coding	YES	NM_006446.5	-	1	P1	CCDS8685.1	ENSP00000256958	Q9Y6L6.181	A0A024RAU7.41	UPI0000043BED	-	-	1	-	-	-	2023-06-14	-	-	ENST00000256958.3:c.629-42G>A	-	-	-	-	-	-	-
	12:21178881:C:T	chr12:21178881	T	ENSG00000134538	ENST00000256958	Transcript	intron_variant	-	-	-	-	-	-	MODIFIER	-	1	-	SNV	SLCO1B1	HGNC	HGNC:10959	protein_coding	YES	NM_006446.5	-	1	P1	CCDS8685.1	ENSP00000256958	Q9Y6L6.181	A0A024RAU7.41	UPI0000043BED	-	-	1	-	-	-	2023-06-14	-	-	ENST00000256958.3:c.629-41C>T	-	-	-	-	-	-	-
	12:21178882:A:G	chr12:21178882	G	ENSG00000134538	ENST00000256958	Transcript	intron_variant	-	-	-	-	-	rs773945474	MODIFIER	-	1	-	SNV	SLCO1B1	HGNC	HGNC:10959	protein_coding	YES	NM_006446.5	-	1	P1	CCDS8685.1	ENSP00000256958	Q9Y6L6.181	A0A024RAU7.41	UPI0000043BED	-	-	1	-	-	-	2023-06-14	-	-	ENST00000256958.3:c.629-40A>G	-	-	-	-	-	-	-
	12:21178883:T:C	chr12:21178883	C	ENSG00000134538	ENST00000256958	Transcript	intron_variant	-	-	-	-	-	rs761261782	MODIFIER	-	1	-	SNV	SLCO1B1	HGNC	HGNC:10959	protein_coding	YES	NM_006446.5	-	1	P1	CCDS8685.1	ENSP00000256958	Q9Y6L6.181	A0A024RAU7.41	UPI0000043BED	-	-	1	-	-	-	2023-06-14	-	-	ENST00000256958.3:c.629-39T>C	-	-	-	-	-	-	-
	12:21178887:T:A	chr12:21178887	A	ENSG00000134538	ENST00000256958	Transcript	intron_variant	-	-	-	-	-	-	MODIFIER	-	1	-	SNV	SLCO1B1	HGNC	HGNC:10959	protein_coding	YES	NM_006446.5	-	1	P1	CCDS8685.1	ENSP00000256958	Q9Y6L6.181	A0A024RAU7.41	UPI0000043BED	-	-	1	-	-	-	2023-06-14	-	-	ENST00000256958.3:c.629-35T>A	-	-	-	-	-	-	-
	12:21178889:G:A	chr12:21178889	A	ENSG00000134538	ENST00000256958	Transcript	intron_variant	-	-	-	-	-	-	MODIFIER	-	1	-	SNV	SLCO1B1	HGNC	HGNC:10959	protein_coding	YES	NM_006446.5	-	1	P1	CCDS8685.1	ENSP00000256958	Q9Y6L6.181	A0A024RAU7.41	UPI0000043BED	-	-	1	-	-	-	2023-06-14	-	-	ENST00000256958.3:c.629-33G>A	-	-	-	-	-	-	-
	12:21178889:G:T	chr12:21178889	T	ENSG00000134538	ENST00000256958	Transcript	intron_variant	-	-	-	-	-	rs374733212	MODIFIER	-	1	-	SNV	SLCO1B1	HGNC	HGNC:10959	protein_coding	YES	NM_006446.5	-	1	P1	CCDS8685.1	ENSP00000256958	Q9Y6L6.181	A0A024RAU7.41	UPI0000043BED	-	-	1	-	-	-	2023-06-14	-	-	ENST00000256958.3:c.629-33G>T	-	-	-	-	-	-	-
	12:21178891:A:G	chr12:21178891	G	ENSG00000134538	ENST00000256958	Transcript	intron_variant	-	-	-	-	-	-	MODIFIER	-	1	-	SNV	SLCO1B1	HGNC	HGNC:10959	protein_coding	YES	NM_006446.5	-	1	P1	CCDS8685.1	ENSP00000256958	Q9Y6L6.181	A0A024RAU7.41	UPI0000043BED	-	-	1	-	-	-	2023-06-14	-	-	ENST00000256958.3:c.629-31A>G	-	-	-	-	-	-	-
	12:21178893:C:T	chr12:21178893	T	ENSG00000134538	ENST00000256958	Transcript	intron_variant	-	-	-	-	-	-	MODIFIER	-	1	-	SNV	SLCO1B1	HGNC	HGNC:10959	protein_coding	YES	NM_006446.5	-	1	P1	CCDS8685.1	ENSP00000256958	Q9Y6L6.181	A0A024RAU7.41	UPI0000043BED	-	-	1	-	-	-	2023-06-14	-	-	ENST00000256958.3:c.629-29C>T	-	-	-	-	-	-	-
	12:21178894:T:C	chr12:21178894	C	ENSG00000134538	ENST00000256958	Transcript	intron_variant	-	-	-	-	-	rs773040083	MODIFIER	-	1	-	SNV	SLCO1B1	HGNC	HGNC:10959	protein_coding	YES	NM_006446.5	-	1	P1	CCDS8685.1	ENSP00000256958	Q9Y6L6.181	A0A024RAU7.41	UPI0000043BED	-	-	1	-	-	-	2023-06-14	-	-	ENST00000256958.3:c.629-28T>C	-	-	-	-	-	-	-
	12:21178896:G:A	chr12:21178896	A	ENSG00000134538	ENST00000256958	Transcript	intron_variant	-	-	-	-	-	-	MODIFIER	-	1	-	SNV	SLCO1B1	HGNC	HGNC:10959	protein_coding	YES	NM_006446.5	-	1	P1	CCDS8685.1	ENSP00000256958	Q9Y6L6.181	A0A024RAU7.41	UPI0000043BED	-	-	1	-	-	-	2023-06-14	-	-	ENST00000256958.3:c.629-26G>A	-	-	-	-	-	-	-
	12:21178897:T:C	chr12:21178897	C	ENSG00000134538	ENST00000256958	Transcript	intron_variant	-	-	-	-	-	-	MODIFIER	-	1	-	SNV	SLCO1B1	HGNC	HGNC:10959	protein_coding	YES	NM_006446.5	-	1	P1	CCDS8685.1	ENSP00000256958	Q9Y6L6.181	A0A024RAU7.41	UPI0000043BED	-	-	1	-	-	-	2023-06-14	-	-	ENST00000256958.3:c.629-25T>C	-	-	-	-	-	-	-
	12:21178898:A:T	chr12:21178898	T	ENSG00000134538	ENST00000256958	Transcript	intron_variant	-	-	-	-	-	rs1469166544	MODIFIER	-	1	-	SNV	SLCO1B1	HGNC	HGNC:10959	protein_coding	YES	NM_006446.5	-	1	P1	CCDS8685.1	ENSP00000256958	Q9Y6L6.181	A0A024RAU7.41	UPI0000043BED	-	-	1	-	-	-	2023-06-14	-	-	ENST00000256958.3:c.629-24A>T	-	-	-	-	-	-	-
	12:21178902:T:C	chr12:21178902	C	ENSG00000134538	ENST00000256958	Transcript	intron_variant	-	-	-	-	-	-	MODIFIER	-	1	-	SNV	SLCO1B1	HGNC	HGNC:10959	protein_coding	YES	NM_006446.5	-	1	P1	CCDS8685.1	ENSP00000256958	Q9Y6L6.181	A0A024RAU7.41	UPI0000043BED	-	-	1	-	-	-	2023-06-14	-	-	ENST00000256958.3:c.629-20T>C	-	-	-	-	-	-	-
	12:21178904:G:A	chr12:21178904	A	ENSG00000134538	ENST00000256958	Transcript	intron_variant	-	-	-	-	-	-	MODIFIER	-	1	-	SNV	SLCO1B1	HGNC	HGNC:10959	protein_coding	YES	NM_006446.5	-	1	P1	CCDS8685.1	ENSP00000256958	Q9Y6L6.181	A0A024RAU7.41	UPI0000043BED	-	-	1	-	-	-	2023-06-14	-	-	ENST00000256958.3:c.629-18G>A	-	-	-	-	-	-	-
	12:21178905:C:T	chr12:21178905	T	ENSG00000134538	ENST00000256958	Transcript	intron_variant	-	-	-	-	-	-	MODIFIER	-	1	-	SNV	SLCO1B1	HGNC	HGNC:10959	protein_coding	YES	NM_006446.5	-	1	P1	CCDS8685.1	ENSP00000256958	Q9Y6L6.181	A0A024RAU7.41	UPI0000043BED	-	-	1	-	-	-	2023-06-14	-	-	ENST00000256958.3:c.629-17C>T	-	-	-	-	-	-	-
	12:21178906:T:C	chr12:21178906	C	ENSG00000134538	ENST00000256958	Transcript	intron_variant	-	-	-	-	-	rs760726940	MODIFIER	-	1	-	SNV	SLCO1B1	HGNC	HGNC:10959	protein_coding	YES	NM_006446.5	-	1	P1	CCDS8685.1	ENSP00000256958	Q9Y6L6.181	A0A024RAU7.41	UPI0000043BED	-	-	1	-	-	-	2023-06-14	-	-	ENST00000256958.3:c.629-16T>C	-	-	-	-	-	-	-
	12:21178909:A:G	chr12:21178909	G	ENSG00000134538	ENST00000256958	Transcript	intron_variant	-	-	-	-	-	rs1177905094	MODIFIER	-	1	-	SNV	SLCO1B1	HGNC	HGNC:10959	protein_coding	YES	NM_006446.5	-	1	P1	CCDS8685.1	ENSP00000256958	Q9Y6L6.181	A0A024RAU7.41	UPI0000043BED	-	-	1	-	-	-	2023-06-14	-	-	ENST00000256958.3:c.629-13A>G	-	-	-	-	-	-	-
	12:21178913:T:C	chr12:21178913	C	ENSG00000134538	ENST00000256958	Transcript	intron_variant	-	-	-	-	-	-	MODIFIER	-	1	-	SNV	SLCO1B1	HGNC	HGNC:10959	protein_coding	YES	NM_006446.5	-	1	P1	CCDS8685.1	ENSP00000256958	Q9Y6L6.181	A0A024RAU7.41	UPI0000043BED	-	-	1	-	-	-	2023-06-14	-	-	ENST00000256958.3:c.629-9T>C	-	-	-	-	-	-	-
	12:21178914:A:G	chr12:21178914	G	ENSG00000134538	ENST00000256958	Transcript	splice_region_variant,intron_variant	-	-	-	-	-	-	LOW	-	1	-	SNV	SLCO1B1	HGNC	HGNC:10959	protein_coding	YES	NM_006446.5	-	1	P1	CCDS8685.1	ENSP00000256958	Q9Y6L6.181	A0A024RAU7.41	UPI0000043BED	-	-	1	-	-	-	2023-06-14	-	-	ENST00000256958.3:c.629-8A>G	-	-	-	-	-	-	-
	12:21178918:T:C	chr12:21178918	C	ENSG00000134538	ENST00000256958	Transcript	splice_region_variant,intron_variant	-	-	-	-	-	rs1056252382	LOW	-	1	-	SNV	SLCO1B1	HGNC	HGNC:10959	protein_coding	YES	NM_006446.5	-	1	P1	CCDS8685.1	ENSP00000256958	Q9Y6L6.181	A0A024RAU7.41	UPI0000043BED	-	-	1	-	-	-	2023-06-14	-	-	ENST00000256958.3:c.629-4T>C	-	-	-	-	-	-	-
	12:21178921:G:A	chr12:21178921	A	ENSG00000134538	ENST00000256958	Transcript	splice_acceptor_variant	-	-	-	-	-	rs1205419424,COSV57011554	HIGH	-	1	-	SNV	SLCO1B1	HGNC	HGNC:10959	protein_coding	YES	NM_006446.5	-	1	P1	CCDS8685.1	ENSP00000256958	Q9Y6L6.181	A0A024RAU7.41	UPI0000043BED	-	-	1	-	-	-	2023-06-14	-	-	ENST00000256958.3:c.629-1G>A	-	-	-	-	-	-	-
	12:21178922:G:A	chr12:21178922	A	ENSG00000134538	ENST00000256958	Transcript	missense_variant,splice_region_variant	733	629	210	G/D	gGt/gAt	rs766417954,COSV99917875	MODERATE	-	1	-	SNV	SLCO1B1	HGNC	HGNC:10959	protein_coding	YES	NM_006446.5	-	1	P1	CCDS8685.1	ENSP00000256958	Q9Y6L6.181	A0A024RAU7.41	UPI0000043BED	-	-	1	deleterious(0)	probably_damaging(1)	2023-07-15	-	Transmembrane_helices:TMhelix,PROSITE_profiles:PS50850,PANTHER:PTHR11388,PANTHER:PTHR11388:SF82,Pfam:PF03137,TIGRFAM:TIGR00805,Superfamily:SSF103473	-	ENST00000256958.3:c.629G>A	ENSP00000256958.2:p.Gly210Asp	-	-	-	-	-	-
	12:21178922:G:T	chr12:21178922	T	ENSG00000134538	ENST00000256958	Transcript	missense_variant,splice_region_variant	733	629	210	G/V	gGt/gTt	rs766417954,COSV99917875	MODERATE	-	1	-	SNV	SLCO1B1	HGNC	HGNC:10959	protein_coding	YES	NM_006446.5	-	1	P1	CCDS8685.1	ENSP00000256958	Q9Y6L6.181	A0A024RAU7.41	UPI0000043BED	-	-	1	deleterious(0)	probably_damaging(0.999)	2023-07-15	-	Transmembrane_helices:TMhelix,PROSITE_profiles:PS50850,PANTHER:PTHR11388,PANTHER:PTHR11388:SF82,Pfam:PF03137,TIGRFAM:TIGR00805,Superfamily:SSF103473	-	ENST00000256958.3:c.629G>T	ENSP00000256958.2:p.Gly210Val	-	-	-	-	-	-
	12:21178924:A:C	chr12:21178924	C	ENSG00000134538	ENST00000256958	Transcript	missense_variant,splice_region_variant	735	631	211	I/L	Ata/Cta	rs184348772	MODERATE	-	1	-	SNV	SLCO1B1	HGNC	HGNC:10959	protein_coding	YES	NM_006446.5	-	1	P1	CCDS8685.1	ENSP00000256958	Q9Y6L6.181	A0A024RAU7.41	UPI0000043BED	-	-	1	tolerated(0.26)	benign(0.02)	2023-07-15	-	Transmembrane_helices:TMhelix,PROSITE_profiles:PS50850,PANTHER:PTHR11388,PANTHER:PTHR11388:SF82,Pfam:PF03137,TIGRFAM:TIGR00805,Superfamily:SSF103473	-	ENST00000256958.3:c.631A>C	ENSP00000256958.2:p.Ile211Leu	-	0.0002	0	0	0	0.001
	12:21178925:T:C	chr12:21178925	C	ENSG00000134538	ENST00000256958	Transcript	missense_variant	736	632	211	I/T	aTa/aCa	rs776613232	MODERATE	-	1	-	SNV	SLCO1B1	HGNC	HGNC:10959	protein_coding	YES	NM_006446.5	-	1	P1	CCDS8685.1	ENSP00000256958	Q9Y6L6.181	A0A024RAU7.41	UPI0000043BED	-	-	1	tolerated(0.72)	benign(0.034)	2023-07-15	-	Transmembrane_helices:TMhelix,PROSITE_profiles:PS50850,PANTHER:PTHR11388,PANTHER:PTHR11388:SF82,Pfam:PF03137,TIGRFAM:TIGR00805,Superfamily:SSF103473	-	ENST00000256958.3:c.632T>C	ENSP00000256958.2:p.Ile211Thr	-	-	-	-	-	-
	12:21178926:A:G	chr12:21178926	G	ENSG00000134538	ENST00000256958	Transcript	missense_variant	737	633	211	I/M	atA/atG	rs201722521	MODERATE	-	1	-	SNV	SLCO1B1	HGNC	HGNC:10959	protein_coding	YES	NM_006446.5	-	1	P1	CCDS8685.1	ENSP00000256958	Q9Y6L6.181	A0A024RAU7.41	UPI0000043BED	-	-	1	tolerated(0.07)	possibly_damaging(0.821)	2023-07-15	-	Transmembrane_helices:TMhelix,PROSITE_profiles:PS50850,PANTHER:PTHR11388,PANTHER:PTHR11388:SF82,Pfam:PF03137,TIGRFAM:TIGR00805,Superfamily:SSF103473	-	ENST00000256958.3:c.633A>G	ENSP00000256958.2:p.Ile211Met	-	0.0076	0	0	0	0
	12:21178931:A:G	chr12:21178931	G	ENSG00000134538	ENST00000256958	Transcript	missense_variant	742	638	213	N/S	aAt/aGt	rs372477451	MODERATE	-	1	-	SNV	SLCO1B1	HGNC	HGNC:10959	protein_coding	YES	NM_006446.5	-	1	P1	CCDS8685.1	ENSP00000256958	Q9Y6L6.181	A0A024RAU7.41	UPI0000043BED	-	-	1	tolerated(0.08)	benign(0.281)	2023-07-15	-	Transmembrane_helices:TMhelix,PROSITE_profiles:PS50850,PANTHER:PTHR11388,PANTHER:PTHR11388:SF82,Pfam:PF03137,TIGRFAM:TIGR00805,Superfamily:SSF103473	-	ENST00000256958.3:c.638A>G	ENSP00000256958.2:p.Asn213Ser	-	-	-	-	-	-
	12:21178935:A:C	chr12:21178935	C	ENSG00000134538	ENST00000256958	Transcript	synonymous_variant	746	642	214	A	gcA/gcC	-	LOW	-	1	-	SNV	SLCO1B1	HGNC	HGNC:10959	protein_coding	YES	NM_006446.5	-	1	P1	CCDS8685.1	ENSP00000256958	Q9Y6L6.181	A0A024RAU7.41	UPI0000043BED	-	-	1	-	-	2023-07-15	-	Transmembrane_helices:TMhelix,PROSITE_profiles:PS50850,PANTHER:PTHR11388,PANTHER:PTHR11388:SF82,Pfam:PF03137,TIGRFAM:TIGR00805,Superfamily:SSF103473	-	ENST00000256958.3:c.642A>C	ENSP00000256958.2:p.Ala214%3D	-	-	-	-	-	-
	12:21178936:A:G	chr12:21178936	G	ENSG00000134538	ENST00000256958	Transcript	missense_variant	747	643	215	I/V	Ata/Gta	-	MODERATE	-	1	-	SNV	SLCO1B1	HGNC	HGNC:10959	protein_coding	YES	NM_006446.5	-	1	P1	CCDS8685.1	ENSP00000256958	Q9Y6L6.181	A0A024RAU7.41	UPI0000043BED	-	-	1	tolerated(0.69)	benign(0.013)	2023-07-15	-	Transmembrane_helices:TMhelix,PROSITE_profiles:PS50850,PANTHER:PTHR11388,PANTHER:PTHR11388:SF82,Pfam:PF03137,TIGRFAM:TIGR00805,Superfamily:SSF103473	-	ENST00000256958.3:c.643A>G	ENSP00000256958.2:p.Ile215Val	-	-	-	-	-	-
	12:21178937:T:C	chr12:21178937	C	ENSG00000134538	ENST00000256958	Transcript	missense_variant	748	644	215	I/T	aTa/aCa	-	MODERATE	-	1	-	SNV	SLCO1B1	HGNC	HGNC:10959	protein_coding	YES	NM_006446.5	-	1	P1	CCDS8685.1	ENSP00000256958	Q9Y6L6.181	A0A024RAU7.41	UPI0000043BED	-	-	1	tolerated(0.06)	possibly_damaging(0.589)	2023-07-15	-	Transmembrane_helices:TMhelix,PROSITE_profiles:PS50850,PANTHER:PTHR11388,PANTHER:PTHR11388:SF82,Pfam:PF03137,TIGRFAM:TIGR00805,Superfamily:SSF103473	-	ENST00000256958.3:c.644T>C	ENSP00000256958.2:p.Ile215Thr	-	-	-	-	-	-
	12:21178938:A:G	chr12:21178938	G	ENSG00000134538	ENST00000256958	Transcript	missense_variant	749	645	215	I/M	atA/atG	-	MODERATE	-	1	-	SNV	SLCO1B1	HGNC	HGNC:10959	protein_coding	YES	NM_006446.5	-	1	P1	CCDS8685.1	ENSP00000256958	Q9Y6L6.181	A0A024RAU7.41	UPI0000043BED	-	-	1	tolerated(0.08)	benign(0.285)	2023-07-15	-	Transmembrane_helices:TMhelix,PROSITE_profiles:PS50850,PANTHER:PTHR11388,PANTHER:PTHR11388:SF82,Pfam:PF03137,TIGRFAM:TIGR00805,Superfamily:SSF103473	-	ENST00000256958.3:c.645A>G	ENSP00000256958.2:p.Ile215Met	-	-	-	-	-	-
	12:21178942:A:G	chr12:21178942	G	ENSG00000134538	ENST00000256958	Transcript	missense_variant	753	649	217	M/V	Atg/Gtg	-	MODERATE	-	1	-	SNV	SLCO1B1	HGNC	HGNC:10959	protein_coding	YES	NM_006446.5	-	1	P1	CCDS8685.1	ENSP00000256958	Q9Y6L6.181	A0A024RAU7.41	UPI0000043BED	-	-	1	tolerated(0.08)	benign(0.027)	2023-07-15	-	Transmembrane_helices:TMhelix,PROSITE_profiles:PS50850,PANTHER:PTHR11388,PANTHER:PTHR11388:SF82,Pfam:PF03137,TIGRFAM:TIGR00805,Superfamily:SSF103473	-	ENST00000256958.3:c.649A>G	ENSP00000256958.2:p.Met217Val	-	-	-	-	-	-
	12:21178944:G:A	chr12:21178944	A	ENSG00000134538	ENST00000256958	Transcript	missense_variant	755	651	217	M/I	atG/atA	-	MODERATE	-	1	-	SNV	SLCO1B1	HGNC	HGNC:10959	protein_coding	YES	NM_006446.5	-	1	P1	CCDS8685.1	ENSP00000256958	Q9Y6L6.181	A0A024RAU7.41	UPI0000043BED	-	-	1	tolerated(0.12)	benign(0.048)	2023-07-15	-	Transmembrane_helices:TMhelix,PROSITE_profiles:PS50850,PANTHER:PTHR11388,PANTHER:PTHR11388:SF82,Pfam:PF03137,TIGRFAM:TIGR00805,Superfamily:SSF103473	-	ENST00000256958.3:c.651G>A	ENSP00000256958.2:p.Met217Ile	-	-	-	-	-	-
	12:21178944:G:T	chr12:21178944	T	ENSG00000134538	ENST00000256958	Transcript	missense_variant	755	651	217	M/I	atG/atT	rs1048383515	MODERATE	-	1	-	SNV	SLCO1B1	HGNC	HGNC:10959	protein_coding	YES	NM_006446.5	-	1	P1	CCDS8685.1	ENSP00000256958	Q9Y6L6.181	A0A024RAU7.41	UPI0000043BED	-	-	1	tolerated(0.12)	benign(0.048)	2023-07-15	-	Transmembrane_helices:TMhelix,PROSITE_profiles:PS50850,PANTHER:PTHR11388,PANTHER:PTHR11388:SF82,Pfam:PF03137,TIGRFAM:TIGR00805,Superfamily:SSF103473	-	ENST00000256958.3:c.651G>T	ENSP00000256958.2:p.Met217Ile	-	-	-	-	-	-
	12:21178945:A:G	chr12:21178945	G	ENSG00000134538	ENST00000256958	Transcript	missense_variant	756	652	218	I/V	Att/Gtt	-	MODERATE	-	1	-	SNV	SLCO1B1	HGNC	HGNC:10959	protein_coding	YES	NM_006446.5	-	1	P1	CCDS8685.1	ENSP00000256958	Q9Y6L6.181	A0A024RAU7.41	UPI0000043BED	-	-	1	tolerated(0.13)	benign(0.074)	2023-07-15	-	Transmembrane_helices:TMhelix,PROSITE_profiles:PS50850,PANTHER:PTHR11388,PANTHER:PTHR11388:SF82,Pfam:PF03137,TIGRFAM:TIGR00805,Superfamily:SSF103473	-	ENST00000256958.3:c.652A>G	ENSP00000256958.2:p.Ile218Val	-	-	-	-	-	-
	12:21178946:T:C	chr12:21178946	C	ENSG00000134538	ENST00000256958	Transcript	missense_variant	757	653	218	I/T	aTt/aCt	-	MODERATE	-	1	-	SNV	SLCO1B1	HGNC	HGNC:10959	protein_coding	YES	NM_006446.5	-	1	P1	CCDS8685.1	ENSP00000256958	Q9Y6L6.181	A0A024RAU7.41	UPI0000043BED	-	-	1	tolerated(0.1)	benign(0.168)	2023-07-15	-	Transmembrane_helices:TMhelix,PROSITE_profiles:PS50850,PANTHER:PTHR11388,PANTHER:PTHR11388:SF82,Pfam:PF03137,TIGRFAM:TIGR00805,Superfamily:SSF103473	-	ENST00000256958.3:c.653T>C	ENSP00000256958.2:p.Ile218Thr	-	-	-	-	-	-
	12:21178949:G:T	chr12:21178949	T	ENSG00000134538	ENST00000256958	Transcript	missense_variant	760	656	219	G/V	gGt/gTt	-	MODERATE	-	1	-	SNV	SLCO1B1	HGNC	HGNC:10959	protein_coding	YES	NM_006446.5	-	1	P1	CCDS8685.1	ENSP00000256958	Q9Y6L6.181	A0A024RAU7.41	UPI0000043BED	-	-	1	deleterious(0)	probably_damaging(0.998)	2023-07-15	-	Transmembrane_helices:TMhelix,PROSITE_profiles:PS50850,PANTHER:PTHR11388,PANTHER:PTHR11388:SF82,Pfam:PF03137,TIGRFAM:TIGR00805,Superfamily:SSF103473	-	ENST00000256958.3:c.656G>T	ENSP00000256958.2:p.Gly219Val	-	-	-	-	-	-
	12:21178950:T:A	chr12:21178950	A	ENSG00000134538	ENST00000256958	Transcript	synonymous_variant	761	657	219	G	ggT/ggA	-	LOW	-	1	-	SNV	SLCO1B1	HGNC	HGNC:10959	protein_coding	YES	NM_006446.5	-	1	P1	CCDS8685.1	ENSP00000256958	Q9Y6L6.181	A0A024RAU7.41	UPI0000043BED	-	-	1	-	-	2023-07-15	-	Transmembrane_helices:TMhelix,PROSITE_profiles:PS50850,PANTHER:PTHR11388,PANTHER:PTHR11388:SF82,Pfam:PF03137,TIGRFAM:TIGR00805,Superfamily:SSF103473	-	ENST00000256958.3:c.657T>A	ENSP00000256958.2:p.Gly219%3D	-	-	-	-	-	-
	12:21178950:T:C	chr12:21178950	C	ENSG00000134538	ENST00000256958	Transcript	synonymous_variant	761	657	219	G	ggT/ggC	-	LOW	-	1	-	SNV	SLCO1B1	HGNC	HGNC:10959	protein_coding	YES	NM_006446.5	-	1	P1	CCDS8685.1	ENSP00000256958	Q9Y6L6.181	A0A024RAU7.41	UPI0000043BED	-	-	1	-	-	2023-07-15	-	Transmembrane_helices:TMhelix,PROSITE_profiles:PS50850,PANTHER:PTHR11388,PANTHER:PTHR11388:SF82,Pfam:PF03137,TIGRFAM:TIGR00805,Superfamily:SSF103473	-	ENST00000256958.3:c.657T>C	ENSP00000256958.2:p.Gly219%3D	-	-	-	-	-	-
	12:21178951:C:A	chr12:21178951	A	ENSG00000134538	ENST00000256958	Transcript	missense_variant	762	658	220	P/T	Cca/Aca	-	MODERATE	-	1	-	SNV	SLCO1B1	HGNC	HGNC:10959	protein_coding	YES	NM_006446.5	-	1	P1	CCDS8685.1	ENSP00000256958	Q9Y6L6.181	A0A024RAU7.41	UPI0000043BED	-	-	1	tolerated(0.05)	possibly_damaging(0.795)	2023-07-15	-	Transmembrane_helices:TMhelix,PROSITE_profiles:PS50850,PANTHER:PTHR11388,PANTHER:PTHR11388:SF82,Pfam:PF03137,TIGRFAM:TIGR00805,Superfamily:SSF103473	-	ENST00000256958.3:c.658C>A	ENSP00000256958.2:p.Pro220Thr	-	-	-	-	-	-
	12:21178953:A:G	chr12:21178953	G	ENSG00000134538	ENST00000256958	Transcript	synonymous_variant	764	660	220	P	ccA/ccG	rs764291734	LOW	-	1	-	SNV	SLCO1B1	HGNC	HGNC:10959	protein_coding	YES	NM_006446.5	-	1	P1	CCDS8685.1	ENSP00000256958	Q9Y6L6.181	A0A024RAU7.41	UPI0000043BED	-	-	1	-	-	2023-07-15	-	Transmembrane_helices:TMhelix,PROSITE_profiles:PS50850,PANTHER:PTHR11388,PANTHER:PTHR11388:SF82,Pfam:PF03137,TIGRFAM:TIGR00805,Superfamily:SSF103473	-	ENST00000256958.3:c.660A>G	ENSP00000256958.2:p.Pro220%3D	-	-	-	-	-	-
	12:21178953:A:T	chr12:21178953	T	ENSG00000134538	ENST00000256958	Transcript	synonymous_variant	764	660	220	P	ccA/ccT	-	LOW	-	1	-	SNV	SLCO1B1	HGNC	HGNC:10959	protein_coding	YES	NM_006446.5	-	1	P1	CCDS8685.1	ENSP00000256958	Q9Y6L6.181	A0A024RAU7.41	UPI0000043BED	-	-	1	-	-	2023-07-15	-	Transmembrane_helices:TMhelix,PROSITE_profiles:PS50850,PANTHER:PTHR11388,PANTHER:PTHR11388:SF82,Pfam:PF03137,TIGRFAM:TIGR00805,Superfamily:SSF103473	-	ENST00000256958.3:c.660A>T	ENSP00000256958.2:p.Pro220%3D	-	-	-	-	-	-
	12:21178957:A:G	chr12:21178957	G	ENSG00000134538	ENST00000256958	Transcript	missense_variant	768	664	222	I/V	Att/Gtt	rs79135870,COSV57016430	MODERATE	-	1	-	SNV	SLCO1B1	HGNC	HGNC:10959	protein_coding	YES	NM_006446.5	-	1	P1	CCDS8685.1	ENSP00000256958	Q9Y6L6.181	A0A024RAU7.41	UPI0000043BED	-	-	1	tolerated(0.17)	benign(0.034)	2023-07-15	-	Transmembrane_helices:TMhelix,PROSITE_profiles:PS50850,PANTHER:PTHR11388,PANTHER:PTHR11388:SF82,Pfam:PF03137,TIGRFAM:TIGR00805,Superfamily:SSF103473	-	ENST00000256958.3:c.664A>G	ENSP00000256958.2:p.Ile222Val	-	0.004	0.0151	0	0	0
	12:21178959:T:A	chr12:21178959	A	ENSG00000134538	ENST00000256958	Transcript	synonymous_variant	770	666	222	I	atT/atA	-	LOW	-	1	-	SNV	SLCO1B1	HGNC	HGNC:10959	protein_coding	YES	NM_006446.5	-	1	P1	CCDS8685.1	ENSP00000256958	Q9Y6L6.181	A0A024RAU7.41	UPI0000043BED	-	-	1	-	-	2023-07-15	-	Transmembrane_helices:TMhelix,PROSITE_profiles:PS50850,PANTHER:PTHR11388,PANTHER:PTHR11388:SF82,Pfam:PF03137,TIGRFAM:TIGR00805,Superfamily:SSF103473	-	ENST00000256958.3:c.666T>A	ENSP00000256958.2:p.Ile222%3D	-	-	-	-	-	-
	12:21178964:T:A	chr12:21178964	A	ENSG00000134538	ENST00000256958	Transcript	missense_variant	775	671	224	F/Y	tTt/tAt	rs756431817	MODERATE	-	1	-	SNV	SLCO1B1	HGNC	HGNC:10959	protein_coding	YES	NM_006446.5	-	1	P1	CCDS8685.1	ENSP00000256958	Q9Y6L6.181	A0A024RAU7.41	UPI0000043BED	-	-	1	tolerated(0.08)	benign(0.122)	2023-07-15	-	Transmembrane_helices:TMhelix,PROSITE_profiles:PS50850,PANTHER:PTHR11388,PANTHER:PTHR11388:SF82,Pfam:PF03137,TIGRFAM:TIGR00805,Superfamily:SSF103473	-	ENST00000256958.3:c.671T>A	ENSP00000256958.2:p.Phe224Tyr	-	-	-	-	-	-
	12:21178966:A:T	chr12:21178966	T	ENSG00000134538	ENST00000256958	Transcript	missense_variant	777	673	225	T/S	Acc/Tcc	-	MODERATE	-	1	-	SNV	SLCO1B1	HGNC	HGNC:10959	protein_coding	YES	NM_006446.5	-	1	P1	CCDS8685.1	ENSP00000256958	Q9Y6L6.181	A0A024RAU7.41	UPI0000043BED	-	-	1	deleterious(0.04)	benign(0.006)	2023-07-15	-	Transmembrane_helices:TMhelix,PROSITE_profiles:PS50850,PANTHER:PTHR11388,PANTHER:PTHR11388:SF82,Pfam:PF03137,TIGRFAM:TIGR00805,Superfamily:SSF103473	-	ENST00000256958.3:c.673A>T	ENSP00000256958.2:p.Thr225Ser	-	-	-	-	-	-
	12:21178969:C:G	chr12:21178969	G	ENSG00000134538	ENST00000256958	Transcript	missense_variant	780	676	226	L/V	Ctg/Gtg	rs747781086	MODERATE	-	1	-	SNV	SLCO1B1	HGNC	HGNC:10959	protein_coding	YES	NM_006446.5	-	1	P1	CCDS8685.1	ENSP00000256958	Q9Y6L6.181	A0A024RAU7.41	UPI0000043BED	-	-	1	deleterious(0.03)	possibly_damaging(0.654)	2023-07-15	-	Transmembrane_helices:TMhelix,PROSITE_profiles:PS50850,PANTHER:PTHR11388,PANTHER:PTHR11388:SF82,Pfam:PF03137,TIGRFAM:TIGR00805,Superfamily:SSF103473	-	ENST00000256958.3:c.676C>G	ENSP00000256958.2:p.Leu226Val	-	-	-	-	-	-
	12:21178969:C:T	chr12:21178969	T	ENSG00000134538	ENST00000256958	Transcript	synonymous_variant	780	676	226	L	Ctg/Ttg	rs747781086	LOW	-	1	-	SNV	SLCO1B1	HGNC	HGNC:10959	protein_coding	YES	NM_006446.5	-	1	P1	CCDS8685.1	ENSP00000256958	Q9Y6L6.181	A0A024RAU7.41	UPI0000043BED	-	-	1	-	-	2023-07-15	-	Transmembrane_helices:TMhelix,PROSITE_profiles:PS50850,PANTHER:PTHR11388,PANTHER:PTHR11388:SF82,Pfam:PF03137,TIGRFAM:TIGR00805,Superfamily:SSF103473	-	ENST00000256958.3:c.676C>T	ENSP00000256958.2:p.Leu226%3D	-	-	-	-	-	-
	12:21178971:G:A	chr12:21178971	A	ENSG00000134538	ENST00000256958	Transcript	synonymous_variant	782	678	226	L	ctG/ctA	-	LOW	-	1	-	SNV	SLCO1B1	HGNC	HGNC:10959	protein_coding	YES	NM_006446.5	-	1	P1	CCDS8685.1	ENSP00000256958	Q9Y6L6.181	A0A024RAU7.41	UPI0000043BED	-	-	1	-	-	2023-07-15	-	Transmembrane_helices:TMhelix,PROSITE_profiles:PS50850,PANTHER:PTHR11388,PANTHER:PTHR11388:SF82,Pfam:PF03137,TIGRFAM:TIGR00805,Superfamily:SSF103473	-	ENST00000256958.3:c.678G>A	ENSP00000256958.2:p.Leu226%3D	-	-	-	-	-	-
	12:21178974:ATC:A	chr12:21178975-21178976	-	ENSG00000134538	ENST00000256958	Transcript	frameshift_variant	786-787	682-683	228	S/X	TCt/t	rs750383873	HIGH	-	1	-	deletion	SLCO1B1	HGNC	HGNC:10959	protein_coding	YES	NM_006446.5	-	1	P1	CCDS8685.1	ENSP00000256958	Q9Y6L6.181	A0A024RAU7.41	UPI0000043BED	-	-	1	-	-	2023-07-15	-	Transmembrane_helices:TMhelix,PROSITE_profiles:PS50850,PANTHER:PTHR11388,PANTHER:PTHR11388:SF82,Pfam:PF03137,TIGRFAM:TIGR00805,Superfamily:SSF103473	-	ENST00000256958.3:c.685_686del	ENSP00000256958.2:p.Leu229ValfsTer3	3	-	-	-	-	-
	12:21178977:T:A	chr12:21178977	A	ENSG00000134538	ENST00000256958	Transcript	synonymous_variant	788	684	228	S	tcT/tcA	COSV57014440	LOW	-	1	-	SNV	SLCO1B1	HGNC	HGNC:10959	protein_coding	YES	NM_006446.5	-	1	P1	CCDS8685.1	ENSP00000256958	Q9Y6L6.181	A0A024RAU7.41	UPI0000043BED	-	-	1	-	-	2023-07-15	-	Transmembrane_helices:TMhelix,PROSITE_profiles:PS50850,PANTHER:PTHR11388,PANTHER:PTHR11388:SF82,Pfam:PF03137,TIGRFAM:TIGR00805,Superfamily:SSF103473	-	ENST00000256958.3:c.684T>A	ENSP00000256958.2:p.Ser228%3D	-	-	-	-	-	-
	12:21178980:G:A	chr12:21178980	A	ENSG00000134538	ENST00000256958	Transcript	synonymous_variant	791	687	229	L	ctG/ctA	rs997710369	LOW	-	1	-	SNV	SLCO1B1	HGNC	HGNC:10959	protein_coding	YES	NM_006446.5	-	1	P1	CCDS8685.1	ENSP00000256958	Q9Y6L6.181	A0A024RAU7.41	UPI0000043BED	-	-	1	-	-	2023-07-15	-	Transmembrane_helices:TMhelix,PROSITE_profiles:PS50850,PANTHER:PTHR11388,PANTHER:PTHR11388:SF82,Pfam:PF03137,TIGRFAM:TIGR00805,Superfamily:SSF103473	-	ENST00000256958.3:c.687G>A	ENSP00000256958.2:p.Leu229%3D	-	-	-	-	-	-
	12:21178980:G:T	chr12:21178980	T	ENSG00000134538	ENST00000256958	Transcript	synonymous_variant	791	687	229	L	ctG/ctT	rs997710369	LOW	-	1	-	SNV	SLCO1B1	HGNC	HGNC:10959	protein_coding	YES	NM_006446.5	-	1	P1	CCDS8685.1	ENSP00000256958	Q9Y6L6.181	A0A024RAU7.41	UPI0000043BED	-	-	1	-	-	2023-07-15	-	Transmembrane_helices:TMhelix,PROSITE_profiles:PS50850,PANTHER:PTHR11388,PANTHER:PTHR11388:SF82,Pfam:PF03137,TIGRFAM:TIGR00805,Superfamily:SSF103473	-	ENST00000256958.3:c.687G>T	ENSP00000256958.2:p.Leu229%3D	-	-	-	-	-	-
	12:21178984:T:C	chr12:21178984	C	ENSG00000134538	ENST00000256958	Transcript	missense_variant	795	691	231	S/P	Tct/Cct	-	MODERATE	-	1	-	SNV	SLCO1B1	HGNC	HGNC:10959	protein_coding	YES	NM_006446.5	-	1	P1	CCDS8685.1	ENSP00000256958	Q9Y6L6.181	A0A024RAU7.41	UPI0000043BED	-	-	1	deleterious(0)	benign(0.356)	2023-07-15	-	PROSITE_profiles:PS50850,PANTHER:PTHR11388,PANTHER:PTHR11388:SF82,Pfam:PF03137,TIGRFAM:TIGR00805,Superfamily:SSF103473	-	ENST00000256958.3:c.691T>C	ENSP00000256958.2:p.Ser231Pro	-	-	-	-	-	-
	12:21178987:A:G	chr12:21178987	G	ENSG00000134538	ENST00000256958	Transcript	missense_variant	798	694	232	K/E	Aaa/Gaa	COSV99918008	MODERATE	-	1	-	SNV	SLCO1B1	HGNC	HGNC:10959	protein_coding	YES	NM_006446.5	-	1	P1	CCDS8685.1	ENSP00000256958	Q9Y6L6.181	A0A024RAU7.41	UPI0000043BED	-	-	1	deleterious(0)	possibly_damaging(0.457)	2023-07-15	-	PROSITE_profiles:PS50850,PANTHER:PTHR11388,PANTHER:PTHR11388:SF82,Pfam:PF03137,TIGRFAM:TIGR00805,Superfamily:SSF103473	-	ENST00000256958.3:c.694A>G	ENSP00000256958.2:p.Lys232Glu	-	-	-	-	-	-
	12:21178988:A:C	chr12:21178988	C	ENSG00000134538	ENST00000256958	Transcript	missense_variant	799	695	232	K/T	aAa/aCa	rs374328647	MODERATE	-	1	-	SNV	SLCO1B1	HGNC	HGNC:10959	protein_coding	YES	NM_006446.5	-	1	P1	CCDS8685.1	ENSP00000256958	Q9Y6L6.181	A0A024RAU7.41	UPI0000043BED	-	-	1	deleterious(0.02)	possibly_damaging(0.457)	2023-07-15	-	PROSITE_profiles:PS50850,PANTHER:PTHR11388,PANTHER:PTHR11388:SF82,Pfam:PF03137,TIGRFAM:TIGR00805,Superfamily:SSF103473	-	ENST00000256958.3:c.695A>C	ENSP00000256958.2:p.Lys232Thr	-	-	-	-	-	-
	12:21178992:G:T	chr12:21178992	T	ENSG00000134538	ENST00000256958	Transcript	missense_variant	803	699	233	M/I	atG/atT	-	MODERATE	-	1	-	SNV	SLCO1B1	HGNC	HGNC:10959	protein_coding	YES	NM_006446.5	-	1	P1	CCDS8685.1	ENSP00000256958	Q9Y6L6.181	A0A024RAU7.41	UPI0000043BED	-	-	1	tolerated(0.23)	benign(0.001)	2023-07-15	-	PROSITE_profiles:PS50850,PANTHER:PTHR11388,PANTHER:PTHR11388:SF82,Pfam:PF03137,TIGRFAM:TIGR00805,Superfamily:SSF103473	-	ENST00000256958.3:c.699G>T	ENSP00000256958.2:p.Met233Ile	-	-	-	-	-	-
	12:21178993:T:C	chr12:21178993	C	ENSG00000134538	ENST00000256958	Transcript	missense_variant	804	700	234	Y/H	Tac/Cac	-	MODERATE	-	1	-	SNV	SLCO1B1	HGNC	HGNC:10959	protein_coding	YES	NM_006446.5	-	1	P1	CCDS8685.1	ENSP00000256958	Q9Y6L6.181	A0A024RAU7.41	UPI0000043BED	-	-	1	deleterious(0)	probably_damaging(0.996)	2023-07-15	-	PROSITE_profiles:PS50850,PANTHER:PTHR11388,PANTHER:PTHR11388:SF82,Pfam:PF03137,TIGRFAM:TIGR00805,Superfamily:SSF103473	-	ENST00000256958.3:c.700T>C	ENSP00000256958.2:p.Tyr234His	-	-	-	-	-	-
	12:21178995:C:A	chr12:21178995	A	ENSG00000134538	ENST00000256958	Transcript	stop_gained	806	702	234	Y/*	taC/taA	COSV57012942	HIGH	-	1	-	SNV	SLCO1B1	HGNC	HGNC:10959	protein_coding	YES	NM_006446.5	-	1	P1	CCDS8685.1	ENSP00000256958	Q9Y6L6.181	A0A024RAU7.41	UPI0000043BED	-	-	1	-	-	2023-07-15	-	PROSITE_profiles:PS50850,PANTHER:PTHR11388,PANTHER:PTHR11388:SF82,Pfam:PF03137,TIGRFAM:TIGR00805,Superfamily:SSF103473	-	ENST00000256958.3:c.702C>A	ENSP00000256958.2:p.Tyr234Ter	-	-	-	-	-	-
	12:21178995:C:T	chr12:21178995	T	ENSG00000134538	ENST00000256958	Transcript	synonymous_variant	806	702	234	Y	taC/taT	rs543278680,COSV57012942	LOW	-	1	-	SNV	SLCO1B1	HGNC	HGNC:10959	protein_coding	YES	NM_006446.5	-	1	P1	CCDS8685.1	ENSP00000256958	Q9Y6L6.181	A0A024RAU7.41	UPI0000043BED	-	-	1	-	-	2023-07-15	-	PROSITE_profiles:PS50850,PANTHER:PTHR11388,PANTHER:PTHR11388:SF82,Pfam:PF03137,TIGRFAM:TIGR00805,Superfamily:SSF103473	-	ENST00000256958.3:c.702C>T	ENSP00000256958.2:p.Tyr234%3D	-	0.0002	0	0	0	0
	12:21178996:G:A	chr12:21178996	A	ENSG00000134538	ENST00000256958	Transcript	missense_variant	807	703	235	V/M	Gtg/Atg	rs147421160,COSV57011261,COSV57012132	MODERATE	-	1	-	SNV	SLCO1B1	HGNC	HGNC:10959	protein_coding	YES	NM_006446.5	-	1	P1	CCDS8685.1	ENSP00000256958	Q9Y6L6.181	A0A024RAU7.41	UPI0000043BED	-	-	1	deleterious(0)	probably_damaging(0.999)	2023-07-15	-	PROSITE_profiles:PS50850,PANTHER:PTHR11388,PANTHER:PTHR11388:SF82,Pfam:PF03137,TIGRFAM:TIGR00805,Superfamily:SSF103473	-	ENST00000256958.3:c.703G>A	ENSP00000256958.2:p.Val235Met	-	-	-	-	-	-
	12:21179006:G:A	chr12:21179006	A	ENSG00000134538	ENST00000256958	Transcript	missense_variant	817	713	238	G/E	gGa/gAa	rs374113543,COSV57008918	MODERATE	-	1	-	SNV	SLCO1B1	HGNC	HGNC:10959	protein_coding	YES	NM_006446.5	-	1	P1	CCDS8685.1	ENSP00000256958	Q9Y6L6.181	A0A024RAU7.41	UPI0000043BED	-	-	1	deleterious(0)	probably_damaging(0.986)	2023-07-15	-	PROSITE_profiles:PS50850,PANTHER:PTHR11388,PANTHER:PTHR11388:SF82,Pfam:PF03137,TIGRFAM:TIGR00805,Superfamily:SSF103473	-	ENST00000256958.3:c.713G>A	ENSP00000256958.2:p.Gly238Glu	-	-	-	-	-	-
	12:21179007:A:G	chr12:21179007	G	ENSG00000134538	ENST00000256958	Transcript	synonymous_variant	818	714	238	G	ggA/ggG	rs1235683445	LOW	-	1	-	SNV	SLCO1B1	HGNC	HGNC:10959	protein_coding	YES	NM_006446.5	-	1	P1	CCDS8685.1	ENSP00000256958	Q9Y6L6.181	A0A024RAU7.41	UPI0000043BED	-	-	1	-	-	2023-07-15	-	PROSITE_profiles:PS50850,PANTHER:PTHR11388,PANTHER:PTHR11388:SF82,Pfam:PF03137,TIGRFAM:TIGR00805,Superfamily:SSF103473	-	ENST00000256958.3:c.714A>G	ENSP00000256958.2:p.Gly238%3D	-	-	-	-	-	-
	12:21179012:T:C	chr12:21179012	C	ENSG00000134538	ENST00000256958	Transcript	missense_variant	823	719	240	V/A	gTa/gCa	-	MODERATE	-	1	-	SNV	SLCO1B1	HGNC	HGNC:10959	protein_coding	YES	NM_006446.5	-	1	P1	CCDS8685.1	ENSP00000256958	Q9Y6L6.181	A0A024RAU7.41	UPI0000043BED	-	-	1	deleterious(0)	probably_damaging(0.996)	2023-07-15	-	PROSITE_profiles:PS50850,PANTHER:PTHR11388,PANTHER:PTHR11388:SF82,Pfam:PF03137,TIGRFAM:TIGR00805,Superfamily:SSF103473	-	ENST00000256958.3:c.719T>C	ENSP00000256958.2:p.Val240Ala	-	-	-	-	-	-
	12:21179014:G:C	chr12:21179014	C	ENSG00000134538	ENST00000256958	Transcript	missense_variant	825	721	241	D/H	Gat/Cat	CM087803,COSV57006574,COSV99919096	MODERATE	-	1	-	SNV	SLCO1B1	HGNC	HGNC:10959	protein_coding	YES	NM_006446.5	-	1	P1	CCDS8685.1	ENSP00000256958	Q9Y6L6.181	A0A024RAU7.41	UPI0000043BED	-	-	1	deleterious(0)	probably_damaging(0.996)	2023-07-15	-	PROSITE_profiles:PS50850,PANTHER:PTHR11388,PANTHER:PTHR11388:SF82,Pfam:PF03137,TIGRFAM:TIGR00805,Superfamily:SSF103473	-	ENST00000256958.3:c.721G>C	ENSP00000256958.2:p.Asp241His	-	-	-	-	-	-
	12:21179014:G:T	chr12:21179014	T	ENSG00000134538	ENST00000256958	Transcript	missense_variant	825	721	241	D/Y	Gat/Tat	rs751709893,CM087803,COSV57006574,COSV99919096	MODERATE	-	1	-	SNV	SLCO1B1	HGNC	HGNC:10959	protein_coding	YES	NM_006446.5	-	1	P1	CCDS8685.1	ENSP00000256958	Q9Y6L6.181	A0A024RAU7.41	UPI0000043BED	-	-	1	deleterious(0)	probably_damaging(0.948)	2023-07-15	-	PROSITE_profiles:PS50850,PANTHER:PTHR11388,PANTHER:PTHR11388:SF82,Pfam:PF03137,TIGRFAM:TIGR00805,Superfamily:SSF103473	-	ENST00000256958.3:c.721G>T	ENSP00000256958.2:p.Asp241Tyr	-	-	-	-	-	-
	12:21179015:A:T	chr12:21179015	T	ENSG00000134538	ENST00000256958	Transcript	missense_variant	826	722	241	D/V	gAt/gTt	rs1054367551	MODERATE	-	1	-	SNV	SLCO1B1	HGNC	HGNC:10959	protein_coding	YES	NM_006446.5	-	1	P1	CCDS8685.1	ENSP00000256958	Q9Y6L6.181	A0A024RAU7.41	UPI0000043BED	-	-	1	deleterious(0)	possibly_damaging(0.838)	2023-07-15	-	PROSITE_profiles:PS50850,PANTHER:PTHR11388,PANTHER:PTHR11388:SF82,Pfam:PF03137,TIGRFAM:TIGR00805,Superfamily:SSF103473	-	ENST00000256958.3:c.722A>T	ENSP00000256958.2:p.Asp241Val	-	-	-	-	-	-
	12:21179016:T:A	chr12:21179016	A	ENSG00000134538	ENST00000256958	Transcript	missense_variant	827	723	241	D/E	gaT/gaA	-	MODERATE	-	1	-	SNV	SLCO1B1	HGNC	HGNC:10959	protein_coding	YES	NM_006446.5	-	1	P1	CCDS8685.1	ENSP00000256958	Q9Y6L6.181	A0A024RAU7.41	UPI0000043BED	-	-	1	deleterious(0)	probably_damaging(0.983)	2023-07-15	-	PROSITE_profiles:PS50850,PANTHER:PTHR11388,PANTHER:PTHR11388:SF82,Pfam:PF03137,TIGRFAM:TIGR00805,Superfamily:SSF103473	-	ENST00000256958.3:c.723T>A	ENSP00000256958.2:p.Asp241Glu	-	-	-	-	-	-
	12:21179028:C:A	chr12:21179028	A	ENSG00000134538	ENST00000256958	Transcript	splice_region_variant,intron_variant	-	-	-	-	-	rs1565674530	LOW	-	1	-	SNV	SLCO1B1	HGNC	HGNC:10959	protein_coding	YES	NM_006446.5	-	1	P1	CCDS8685.1	ENSP00000256958	Q9Y6L6.181	A0A024RAU7.41	UPI0000043BED	-	-	1	-	-	-	2023-07-14	-	-	ENST00000256958.3:c.727+8C>A	-	-	-	-	-	-	-
	12:21179029:A:G	chr12:21179029	G	ENSG00000134538	ENST00000256958	Transcript	intron_variant	-	-	-	-	-	rs111279867	MODIFIER	-	1	-	SNV	SLCO1B1	HGNC	HGNC:10959	protein_coding	YES	NM_006446.5	-	1	P1	CCDS8685.1	ENSP00000256958	Q9Y6L6.181	A0A024RAU7.41	UPI0000043BED	-	-	1	-	-	-	2023-07-14	-	-	ENST00000256958.3:c.727+9A>G	-	-	-	-	-	-	-
	12:21179031:C:A	chr12:21179031	A	ENSG00000134538	ENST00000256958	Transcript	intron_variant	-	-	-	-	-	-	MODIFIER	-	1	-	SNV	SLCO1B1	HGNC	HGNC:10959	protein_coding	YES	NM_006446.5	-	1	P1	CCDS8685.1	ENSP00000256958	Q9Y6L6.181	A0A024RAU7.41	UPI0000043BED	-	-	1	-	-	-	2023-07-14	-	-	ENST00000256958.3:c.727+11C>A	-	-	-	-	-	-	-
	12:21179036:A:G	chr12:21179036	G	ENSG00000134538	ENST00000256958	Transcript	intron_variant	-	-	-	-	-	rs750863994	MODIFIER	-	1	-	SNV	SLCO1B1	HGNC	HGNC:10959	protein_coding	YES	NM_006446.5	-	1	P1	CCDS8685.1	ENSP00000256958	Q9Y6L6.181	A0A024RAU7.41	UPI0000043BED	-	-	1	-	-	-	2023-07-14	-	-	ENST00000256958.3:c.727+16A>G	-	-	-	-	-	-	-
	12:21179042:T:C	chr12:21179042	C	ENSG00000134538	ENST00000256958	Transcript	intron_variant	-	-	-	-	-	rs1363278635	MODIFIER	-	1	-	SNV	SLCO1B1	HGNC	HGNC:10959	protein_coding	YES	NM_006446.5	-	1	P1	CCDS8685.1	ENSP00000256958	Q9Y6L6.181	A0A024RAU7.41	UPI0000043BED	-	-	1	-	-	-	2023-07-14	-	-	ENST00000256958.3:c.727+22T>C	-	-	-	-	-	-	-
	12:21179044:C:A	chr12:21179044	A	ENSG00000134538	ENST00000256958	Transcript	intron_variant	-	-	-	-	-	rs1428015314	MODIFIER	-	1	-	SNV	SLCO1B1	HGNC	HGNC:10959	protein_coding	YES	NM_006446.5	-	1	P1	CCDS8685.1	ENSP00000256958	Q9Y6L6.181	A0A024RAU7.41	UPI0000043BED	-	-	1	-	-	-	2023-07-14	-	-	ENST00000256958.3:c.727+24C>A	-	-	-	-	-	-	-
	12:21179045:C:T	chr12:21179045	T	ENSG00000134538	ENST00000256958	Transcript	intron_variant	-	-	-	-	-	rs192894171	MODIFIER	-	1	-	SNV	SLCO1B1	HGNC	HGNC:10959	protein_coding	YES	NM_006446.5	-	1	P1	CCDS8685.1	ENSP00000256958	Q9Y6L6.181	A0A024RAU7.41	UPI0000043BED	-	-	1	-	-	-	2023-07-14	-	-	ENST00000256958.3:c.727+25C>T	-	-	-	-	-	-	-
	12:21179047:T:A	chr12:21179047	A	ENSG00000134538	ENST00000256958	Transcript	intron_variant	-	-	-	-	-	-	MODIFIER	-	1	-	SNV	SLCO1B1	HGNC	HGNC:10959	protein_coding	YES	NM_006446.5	-	1	P1	CCDS8685.1	ENSP00000256958	Q9Y6L6.181	A0A024RAU7.41	UPI0000043BED	-	-	1	-	-	-	2023-07-14	-	-	ENST00000256958.3:c.727+27T>A	-	-	-	-	-	-	-
	12:21179047:T:C	chr12:21179047	C	ENSG00000134538	ENST00000256958	Transcript	intron_variant	-	-	-	-	-	rs1236684194	MODIFIER	-	1	-	SNV	SLCO1B1	HGNC	HGNC:10959	protein_coding	YES	NM_006446.5	-	1	P1	CCDS8685.1	ENSP00000256958	Q9Y6L6.181	A0A024RAU7.41	UPI0000043BED	-	-	1	-	-	-	2023-07-14	-	-	ENST00000256958.3:c.727+27T>C	-	-	-	-	-	-	-
	12:21179047:T:G	chr12:21179047	G	ENSG00000134538	ENST00000256958	Transcript	intron_variant	-	-	-	-	-	rs1236684194	MODIFIER	-	1	-	SNV	SLCO1B1	HGNC	HGNC:10959	protein_coding	YES	NM_006446.5	-	1	P1	CCDS8685.1	ENSP00000256958	Q9Y6L6.181	A0A024RAU7.41	UPI0000043BED	-	-	1	-	-	-	2023-07-14	-	-	ENST00000256958.3:c.727+27T>G	-	-	-	-	-	-	-
	12:21179048:G:A	chr12:21179048	A	ENSG00000134538	ENST00000256958	Transcript	intron_variant	-	-	-	-	-	rs1470162494	MODIFIER	-	1	-	SNV	SLCO1B1	HGNC	HGNC:10959	protein_coding	YES	NM_006446.5	-	1	P1	CCDS8685.1	ENSP00000256958	Q9Y6L6.181	A0A024RAU7.41	UPI0000043BED	-	-	1	-	-	-	2023-07-14	-	-	ENST00000256958.3:c.727+28G>A	-	-	-	-	-	-	-
	12:21179049:A:C	chr12:21179049	C	ENSG00000134538	ENST00000256958	Transcript	intron_variant	-	-	-	-	-	-	MODIFIER	-	1	-	SNV	SLCO1B1	HGNC	HGNC:10959	protein_coding	YES	NM_006446.5	-	1	P1	CCDS8685.1	ENSP00000256958	Q9Y6L6.181	A0A024RAU7.41	UPI0000043BED	-	-	1	-	-	-	2023-07-14	-	-	ENST00000256958.3:c.727+29A>C	-	-	-	-	-	-	-
	12:21179053:C:A	chr12:21179053	A	ENSG00000134538	ENST00000256958	Transcript	intron_variant	-	-	-	-	-	rs2291076,COSV57008697	MODIFIER	-	1	-	SNV	SLCO1B1	HGNC	HGNC:10959	protein_coding	YES	NM_006446.5	-	1	P1	CCDS8685.1	ENSP00000256958	Q9Y6L6.181	A0A024RAU7.41	UPI0000043BED	-	-	1	-	-	-	2023-07-14	-	-	ENST00000256958.3:c.727+33C>A	-	-	-	-	-	-	-
	12:21179053:C:T	chr12:21179053	T	ENSG00000134538	ENST00000256958	Transcript	intron_variant	-	-	-	-	-	rs2291076,COSV57008697	MODIFIER	-	1	-	SNV	SLCO1B1	HGNC	HGNC:10959	protein_coding	YES	NM_006446.5	-	1	P1	CCDS8685.1	ENSP00000256958	Q9Y6L6.181	A0A024RAU7.41	UPI0000043BED	-	-	1	-	-	-	2023-07-14	-	-	ENST00000256958.3:c.727+33C>T	-	-	0.2935	0.0477	0.4035	0.245	0.4642
	12:21179054:G:A	chr12:21179054	A	ENSG00000134538	ENST00000256958	Transcript	intron_variant	-	-	-	-	-	rs758113138	MODIFIER	-	1	-	SNV	SLCO1B1	HGNC	HGNC:10959	protein_coding	YES	NM_006446.5	-	1	P1	CCDS8685.1	ENSP00000256958	Q9Y6L6.181	A0A024RAU7.41	UPI0000043BED	-	-	1	-	-	-	2023-07-14	-	-	ENST00000256958.3:c.727+34G>A	-	-	-	-	-	-	-
	12:21179058:T:G	chr12:21179058	G	ENSG00000134538	ENST00000256958	Transcript	intron_variant	-	-	-	-	-	rs552235261	MODIFIER	-	1	-	SNV	SLCO1B1	HGNC	HGNC:10959	protein_coding	YES	NM_006446.5	-	1	P1	CCDS8685.1	ENSP00000256958	Q9Y6L6.181	A0A024RAU7.41	UPI0000043BED	-	-	1	-	-	-	2023-07-14	-	-	ENST00000256958.3:c.727+38T>G	-	-	-	-	-	-	-
	12:21179060:C:T	chr12:21179060	T	ENSG00000134538	ENST00000256958	Transcript	intron_variant	-	-	-	-	-	-	MODIFIER	-	1	-	SNV	SLCO1B1	HGNC	HGNC:10959	protein_coding	YES	NM_006446.5	-	1	P1	CCDS8685.1	ENSP00000256958	Q9Y6L6.181	A0A024RAU7.41	UPI0000043BED	-	-	1	-	-	-	2023-07-14	-	-	ENST00000256958.3:c.727+40C>T	-	-	-	-	-	-	-
	12:21179065:C:T	chr12:21179065	T	ENSG00000134538	ENST00000256958	Transcript	intron_variant	-	-	-	-	-	-	MODIFIER	-	1	-	SNV	SLCO1B1	HGNC	HGNC:10959	protein_coding	YES	NM_006446.5	-	1	P1	CCDS8685.1	ENSP00000256958	Q9Y6L6.181	A0A024RAU7.41	UPI0000043BED	-	-	1	-	-	-	2023-07-14	-	-	ENST00000256958.3:c.727+45C>T	-	-	-	-	-	-	-
	12:21179067:C:T	chr12:21179067	T	ENSG00000134538	ENST00000256958	Transcript	intron_variant	-	-	-	-	-	-	MODIFIER	-	1	-	SNV	SLCO1B1	HGNC	HGNC:10959	protein_coding	YES	NM_006446.5	-	1	P1	CCDS8685.1	ENSP00000256958	Q9Y6L6.181	A0A024RAU7.41	UPI0000043BED	-	-	1	-	-	-	2023-07-14	-	-	ENST00000256958.3:c.727+47C>T	-	-	-	-	-	-	-
	12:21179070:A:G	chr12:21179070	G	ENSG00000134538	ENST00000256958	Transcript	intron_variant	-	-	-	-	-	-	MODIFIER	-	1	-	SNV	SLCO1B1	HGNC	HGNC:10959	protein_coding	YES	NM_006446.5	-	1	P1	CCDS8685.1	ENSP00000256958	Q9Y6L6.181	A0A024RAU7.41	UPI0000043BED	-	-	1	-	-	-	2023-07-14	-	-	ENST00000256958.3:c.727+50A>G	-	-	-	-	-	-	-
	12:21179073:C:T	chr12:21179073	T	ENSG00000134538	ENST00000256958	Transcript	intron_variant	-	-	-	-	-	rs1029422043,COSV99917994	MODIFIER	-	1	-	SNV	SLCO1B1	HGNC	HGNC:10959	protein_coding	YES	NM_006446.5	-	1	P1	CCDS8685.1	ENSP00000256958	Q9Y6L6.181	A0A024RAU7.41	UPI0000043BED	-	-	1	-	-	-	2023-07-14	-	-	ENST00000256958.3:c.727+53C>T	-	-	-	-	-	-	-
	12:21179074:G:A	chr12:21179074	A	ENSG00000134538	ENST00000256958	Transcript	intron_variant	-	-	-	-	-	rs1317061934	MODIFIER	-	1	-	SNV	SLCO1B1	HGNC	HGNC:10959	protein_coding	YES	NM_006446.5	-	1	P1	CCDS8685.1	ENSP00000256958	Q9Y6L6.181	A0A024RAU7.41	UPI0000043BED	-	-	1	-	-	-	2023-07-14	-	-	ENST00000256958.3:c.727+54G>A	-	-	-	-	-	-	-
	12:21179076:A:T	chr12:21179076	T	ENSG00000134538	ENST00000256958	Transcript	intron_variant	-	-	-	-	-	rs561978841	MODIFIER	-	1	-	SNV	SLCO1B1	HGNC	HGNC:10959	protein_coding	YES	NM_006446.5	-	1	P1	CCDS8685.1	ENSP00000256958	Q9Y6L6.181	A0A024RAU7.41	UPI0000043BED	-	-	1	-	-	-	2023-07-14	-	-	ENST00000256958.3:c.727+56A>T	-	-	0.0002	0	0	0	0.001
	12:21179079:A:G	chr12:21179079	G	ENSG00000134538	ENST00000256958	Transcript	intron_variant	-	-	-	-	-	-	MODIFIER	-	1	-	SNV	SLCO1B1	HGNC	HGNC:10959	protein_coding	YES	NM_006446.5	-	1	P1	CCDS8685.1	ENSP00000256958	Q9Y6L6.181	A0A024RAU7.41	UPI0000043BED	-	-	1	-	-	-	2023-07-14	-	-	ENST00000256958.3:c.727+59A>G	-	-	-	-	-	-	-
	12:21179080:C:T	chr12:21179080	T	ENSG00000134538	ENST00000256958	Transcript	intron_variant	-	-	-	-	-	rs1365953252	MODIFIER	-	1	-	SNV	SLCO1B1	HGNC	HGNC:10959	protein_coding	YES	NM_006446.5	-	1	P1	CCDS8685.1	ENSP00000256958	Q9Y6L6.181	A0A024RAU7.41	UPI0000043BED	-	-	1	-	-	-	2023-07-14	-	-	ENST00000256958.3:c.727+60C>T	-	-	-	-	-	-	-
	12:21179081:A:AT	chr12:21179081-21179082	T	ENSG00000134538	ENST00000256958	Transcript	intron_variant	-	-	-	-	-	-	MODIFIER	-	1	-	insertion	SLCO1B1	HGNC	HGNC:10959	protein_coding	YES	NM_006446.5	-	1	P1	CCDS8685.1	ENSP00000256958	Q9Y6L6.181	A0A024RAU7.41	UPI0000043BED	-	-	1	-	-	-	2023-07-14	-	-	ENST00000256958.3:c.727+67dup	-	-	-	-	-	-	-
	12:21179082:T:C	chr12:21179082	C	ENSG00000134538	ENST00000256958	Transcript	intron_variant	-	-	-	-	-	-	MODIFIER	-	1	-	SNV	SLCO1B1	HGNC	HGNC:10959	protein_coding	YES	NM_006446.5	-	1	P1	CCDS8685.1	ENSP00000256958	Q9Y6L6.181	A0A024RAU7.41	UPI0000043BED	-	-	1	-	-	-	2023-07-14	-	-	ENST00000256958.3:c.727+62T>C	-	-	-	-	-	-	-
	12:21179088:C:G	chr12:21179088	G	ENSG00000134538	ENST00000256958	Transcript	intron_variant	-	-	-	-	-	-	MODIFIER	-	1	-	SNV	SLCO1B1	HGNC	HGNC:10959	protein_coding	YES	NM_006446.5	-	1	P1	CCDS8685.1	ENSP00000256958	Q9Y6L6.181	A0A024RAU7.41	UPI0000043BED	-	-	1	-	-	-	2023-07-14	-	-	ENST00000256958.3:c.727+68C>G	-	-	-	-	-	-	-
	12:21179102:C:A	chr12:21179102	A	ENSG00000134538	ENST00000256958	Transcript	intron_variant	-	-	-	-	-	-	MODIFIER	-	1	-	SNV	SLCO1B1	HGNC	HGNC:10959	protein_coding	YES	NM_006446.5	-	1	P1	CCDS8685.1	ENSP00000256958	Q9Y6L6.181	A0A024RAU7.41	UPI0000043BED	-	-	1	-	-	-	2023-07-14	-	-	ENST00000256958.3:c.727+82C>A	-	-	-	-	-	-	-
	12:21179102:C:T	chr12:21179102	T	ENSG00000134538	ENST00000256958	Transcript	intron_variant	-	-	-	-	-	-	MODIFIER	-	1	-	SNV	SLCO1B1	HGNC	HGNC:10959	protein_coding	YES	NM_006446.5	-	1	P1	CCDS8685.1	ENSP00000256958	Q9Y6L6.181	A0A024RAU7.41	UPI0000043BED	-	-	1	-	-	-	2023-07-14	-	-	ENST00000256958.3:c.727+82C>T	-	-	-	-	-	-	-
	12:21179104:C:T	chr12:21179104	T	ENSG00000134538	ENST00000256958	Transcript	intron_variant	-	-	-	-	-	-	MODIFIER	-	1	-	SNV	SLCO1B1	HGNC	HGNC:10959	protein_coding	YES	NM_006446.5	-	1	P1	CCDS8685.1	ENSP00000256958	Q9Y6L6.181	A0A024RAU7.41	UPI0000043BED	-	-	1	-	-	-	2023-07-14	-	-	ENST00000256958.3:c.727+84C>T	-	-	-	-	-	-	-
	12:21179105:T:C	chr12:21179105	C	ENSG00000134538	ENST00000256958	Transcript	intron_variant	-	-	-	-	-	rs982411193	MODIFIER	-	1	-	SNV	SLCO1B1	HGNC	HGNC:10959	protein_coding	YES	NM_006446.5	-	1	P1	CCDS8685.1	ENSP00000256958	Q9Y6L6.181	A0A024RAU7.41	UPI0000043BED	-	-	1	-	-	-	2023-07-14	-	-	ENST00000256958.3:c.727+85T>C	-	-	-	-	-	-	-
	12:21179105:TCTTTCAATAGTC:T	chr12:21179106-21179117	-	ENSG00000134538	ENST00000256958	Transcript	intron_variant	-	-	-	-	-	rs77407715	MODIFIER	-	1	-	deletion	SLCO1B1	HGNC	HGNC:10959	protein_coding	YES	NM_006446.5	-	1	P1	CCDS8685.1	ENSP00000256958	Q9Y6L6.181	A0A024RAU7.41	UPI0000043BED	-	-	1	-	-	-	2023-07-14	-	-	ENST00000256958.3:c.727+90_727+101del	-	-	-	0.0136	0.0014	0	0
	12:21179108:T:C	chr12:21179108	C	ENSG00000134538	ENST00000256958	Transcript	intron_variant	-	-	-	-	-	-	MODIFIER	-	1	-	SNV	SLCO1B1	HGNC	HGNC:10959	protein_coding	YES	NM_006446.5	-	1	P1	CCDS8685.1	ENSP00000256958	Q9Y6L6.181	A0A024RAU7.41	UPI0000043BED	-	-	1	-	-	-	2023-07-14	-	-	ENST00000256958.3:c.727+88T>C	-	-	-	-	-	-	-
	12:21179112:A:T	chr12:21179112	T	ENSG00000134538	ENST00000256958	Transcript	intron_variant	-	-	-	-	-	rs1006555448	MODIFIER	-	1	-	SNV	SLCO1B1	HGNC	HGNC:10959	protein_coding	YES	NM_006446.5	-	1	P1	CCDS8685.1	ENSP00000256958	Q9Y6L6.181	A0A024RAU7.41	UPI0000043BED	-	-	1	-	-	-	2023-07-14	-	-	ENST00000256958.3:c.727+92A>T	-	-	-	-	-	-	-
	12:21179114:A:T	chr12:21179114	T	ENSG00000134538	ENST00000256958	Transcript	intron_variant	-	-	-	-	-	-	MODIFIER	-	1	-	SNV	SLCO1B1	HGNC	HGNC:10959	protein_coding	YES	NM_006446.5	-	1	P1	CCDS8685.1	ENSP00000256958	Q9Y6L6.181	A0A024RAU7.41	UPI0000043BED	-	-	1	-	-	-	2023-07-14	-	-	ENST00000256958.3:c.727+94A>T	-	-	-	-	-	-	-
	12:21179118:C:T	chr12:21179118	T	ENSG00000134538	ENST00000256958	Transcript	intron_variant	-	-	-	-	-	-	MODIFIER	-	1	-	SNV	SLCO1B1	HGNC	HGNC:10959	protein_coding	YES	NM_006446.5	-	1	P1	CCDS8685.1	ENSP00000256958	Q9Y6L6.181	A0A024RAU7.41	UPI0000043BED	-	-	1	-	-	-	2023-07-14	-	-	ENST00000256958.3:c.727+98C>T	-	-	-	-	-	-	-
	12:21196849:TG:T	chr12:21196850	-	ENSG00000134538	ENST00000256958	Transcript	intron_variant	-	-	-	-	-	-	MODIFIER	-	1	-	deletion	SLCO1B1	HGNC	HGNC:10959	protein_coding	YES	NM_006446.5	-	1	P1	CCDS8685.1	ENSP00000256958	Q9Y6L6.181	A0A024RAU7.41	UPI0000043BED	-	-	1	-	-	-	2023-07-14	-	-	ENST00000256958.3:c.728-96del	-	-	-	-	-	-	-
	12:21196850:G:A	chr12:21196850	A	ENSG00000134538	ENST00000256958	Transcript	intron_variant	-	-	-	-	-	-	MODIFIER	-	1	-	SNV	SLCO1B1	HGNC	HGNC:10959	protein_coding	YES	NM_006446.5	-	1	P1	CCDS8685.1	ENSP00000256958	Q9Y6L6.181	A0A024RAU7.41	UPI0000043BED	-	-	1	-	-	-	2023-07-14	-	-	ENST00000256958.3:c.728-96G>A	-	-	-	-	-	-	-
	12:21196851:A:G	chr12:21196851	G	ENSG00000134538	ENST00000256958	Transcript	intron_variant	-	-	-	-	-	-	MODIFIER	-	1	-	SNV	SLCO1B1	HGNC	HGNC:10959	protein_coding	YES	NM_006446.5	-	1	P1	CCDS8685.1	ENSP00000256958	Q9Y6L6.181	A0A024RAU7.41	UPI0000043BED	-	-	1	-	-	-	2023-07-14	-	-	ENST00000256958.3:c.728-95A>G	-	-	-	-	-	-	-
	12:21196852:G:A	chr12:21196852	A	ENSG00000134538	ENST00000256958	Transcript	intron_variant	-	-	-	-	-	rs572488979	MODIFIER	-	1	-	SNV	SLCO1B1	HGNC	HGNC:10959	protein_coding	YES	NM_006446.5	-	1	P1	CCDS8685.1	ENSP00000256958	Q9Y6L6.181	A0A024RAU7.41	UPI0000043BED	-	-	1	-	-	-	2023-07-14	-	-	ENST00000256958.3:c.728-94G>A	-	-	0.0002	0	0	0	0
	12:21196857:T:G	chr12:21196857	G	ENSG00000134538	ENST00000256958	Transcript	intron_variant	-	-	-	-	-	-	MODIFIER	-	1	-	SNV	SLCO1B1	HGNC	HGNC:10959	protein_coding	YES	NM_006446.5	-	1	P1	CCDS8685.1	ENSP00000256958	Q9Y6L6.181	A0A024RAU7.41	UPI0000043BED	-	-	1	-	-	-	2023-07-14	-	-	ENST00000256958.3:c.728-89T>G	-	-	-	-	-	-	-
	12:21196858:G:A	chr12:21196858	A	ENSG00000134538	ENST00000256958	Transcript	intron_variant	-	-	-	-	-	-	MODIFIER	-	1	-	SNV	SLCO1B1	HGNC	HGNC:10959	protein_coding	YES	NM_006446.5	-	1	P1	CCDS8685.1	ENSP00000256958	Q9Y6L6.181	A0A024RAU7.41	UPI0000043BED	-	-	1	-	-	-	2023-07-14	-	-	ENST00000256958.3:c.728-88G>A	-	-	-	-	-	-	-
	12:21196859:T:C	chr12:21196859	C	ENSG00000134538	ENST00000256958	Transcript	intron_variant	-	-	-	-	-	-	MODIFIER	-	1	-	SNV	SLCO1B1	HGNC	HGNC:10959	protein_coding	YES	NM_006446.5	-	1	P1	CCDS8685.1	ENSP00000256958	Q9Y6L6.181	A0A024RAU7.41	UPI0000043BED	-	-	1	-	-	-	2023-07-14	-	-	ENST00000256958.3:c.728-87T>C	-	-	-	-	-	-	-
	12:21196860:A:G	chr12:21196860	G	ENSG00000134538	ENST00000256958	Transcript	intron_variant	-	-	-	-	-	-	MODIFIER	-	1	-	SNV	SLCO1B1	HGNC	HGNC:10959	protein_coding	YES	NM_006446.5	-	1	P1	CCDS8685.1	ENSP00000256958	Q9Y6L6.181	A0A024RAU7.41	UPI0000043BED	-	-	1	-	-	-	2023-07-14	-	-	ENST00000256958.3:c.728-86A>G	-	-	-	-	-	-	-
	12:21196865:A:G	chr12:21196865	G	ENSG00000134538	ENST00000256958	Transcript	intron_variant	-	-	-	-	-	rs370922939	MODIFIER	-	1	-	SNV	SLCO1B1	HGNC	HGNC:10959	protein_coding	YES	NM_006446.5	-	1	P1	CCDS8685.1	ENSP00000256958	Q9Y6L6.181	A0A024RAU7.41	UPI0000043BED	-	-	1	-	-	-	2023-07-14	-	-	ENST00000256958.3:c.728-81A>G	-	-	0.0086	0	0	0	0
	12:21196867:T:C	chr12:21196867	C	ENSG00000134538	ENST00000256958	Transcript	intron_variant	-	-	-	-	-	-	MODIFIER	-	1	-	SNV	SLCO1B1	HGNC	HGNC:10959	protein_coding	YES	NM_006446.5	-	1	P1	CCDS8685.1	ENSP00000256958	Q9Y6L6.181	A0A024RAU7.41	UPI0000043BED	-	-	1	-	-	-	2023-07-14	-	-	ENST00000256958.3:c.728-79T>C	-	-	-	-	-	-	-
	12:21196876:AC:A	chr12:21196877	-	ENSG00000134538	ENST00000256958	Transcript	intron_variant	-	-	-	-	-	-	MODIFIER	-	1	-	deletion	SLCO1B1	HGNC	HGNC:10959	protein_coding	YES	NM_006446.5	-	1	P1	CCDS8685.1	ENSP00000256958	Q9Y6L6.181	A0A024RAU7.41	UPI0000043BED	-	-	1	-	-	-	2023-07-14	-	-	ENST00000256958.3:c.728-68del	-	-	-	-	-	-	-
	12:21196879:A:G	chr12:21196879	G	ENSG00000134538	ENST00000256958	Transcript	intron_variant	-	-	-	-	-	-	MODIFIER	-	1	-	SNV	SLCO1B1	HGNC	HGNC:10959	protein_coding	YES	NM_006446.5	-	1	P1	CCDS8685.1	ENSP00000256958	Q9Y6L6.181	A0A024RAU7.41	UPI0000043BED	-	-	1	-	-	-	2023-07-14	-	-	ENST00000256958.3:c.728-67A>G	-	-	-	-	-	-	-
	12:21196879:A:T	chr12:21196879	T	ENSG00000134538	ENST00000256958	Transcript	intron_variant	-	-	-	-	-	-	MODIFIER	-	1	-	SNV	SLCO1B1	HGNC	HGNC:10959	protein_coding	YES	NM_006446.5	-	1	P1	CCDS8685.1	ENSP00000256958	Q9Y6L6.181	A0A024RAU7.41	UPI0000043BED	-	-	1	-	-	-	2023-07-14	-	-	ENST00000256958.3:c.728-67A>T	-	-	-	-	-	-	-
	12:21196880:T:A	chr12:21196880	A	ENSG00000134538	ENST00000256958	Transcript	intron_variant	-	-	-	-	-	-	MODIFIER	-	1	-	SNV	SLCO1B1	HGNC	HGNC:10959	protein_coding	YES	NM_006446.5	-	1	P1	CCDS8685.1	ENSP00000256958	Q9Y6L6.181	A0A024RAU7.41	UPI0000043BED	-	-	1	-	-	-	2023-07-14	-	-	ENST00000256958.3:c.728-66T>A	-	-	-	-	-	-	-
	12:21196887:C:G	chr12:21196887	G	ENSG00000134538	ENST00000256958	Transcript	intron_variant	-	-	-	-	-	rs199773642	MODIFIER	-	1	-	SNV	SLCO1B1	HGNC	HGNC:10959	protein_coding	YES	NM_006446.5	-	1	P1	CCDS8685.1	ENSP00000256958	Q9Y6L6.181	A0A024RAU7.41	UPI0000043BED	-	-	1	-	-	-	2023-07-14	-	-	ENST00000256958.3:c.728-59C>G	-	-	-	-	-	-	-
	12:21196887:C:T	chr12:21196887	T	ENSG00000134538	ENST00000256958	Transcript	intron_variant	-	-	-	-	-	rs199773642	MODIFIER	-	1	-	SNV	SLCO1B1	HGNC	HGNC:10959	protein_coding	YES	NM_006446.5	-	1	P1	CCDS8685.1	ENSP00000256958	Q9Y6L6.181	A0A024RAU7.41	UPI0000043BED	-	-	1	-	-	-	2023-07-14	-	-	ENST00000256958.3:c.728-59C>T	-	-	-	-	-	-	-
	12:21196890:G:C	chr12:21196890	C	ENSG00000134538	ENST00000256958	Transcript	intron_variant	-	-	-	-	-	rs374681181	MODIFIER	-	1	-	SNV	SLCO1B1	HGNC	HGNC:10959	protein_coding	YES	NM_006446.5	-	1	P1	CCDS8685.1	ENSP00000256958	Q9Y6L6.181	A0A024RAU7.41	UPI0000043BED	-	-	1	-	-	-	2023-07-14	-	-	ENST00000256958.3:c.728-56G>C	-	-	-	-	-	-	-
	12:21196891:A:T	chr12:21196891	T	ENSG00000134538	ENST00000256958	Transcript	intron_variant	-	-	-	-	-	-	MODIFIER	-	1	-	SNV	SLCO1B1	HGNC	HGNC:10959	protein_coding	YES	NM_006446.5	-	1	P1	CCDS8685.1	ENSP00000256958	Q9Y6L6.181	A0A024RAU7.41	UPI0000043BED	-	-	1	-	-	-	2023-07-14	-	-	ENST00000256958.3:c.728-55A>T	-	-	-	-	-	-	-
	12:21196893:C:T	chr12:21196893	T	ENSG00000134538	ENST00000256958	Transcript	intron_variant	-	-	-	-	-	rs1591816866	MODIFIER	-	1	-	SNV	SLCO1B1	HGNC	HGNC:10959	protein_coding	YES	NM_006446.5	-	1	P1	CCDS8685.1	ENSP00000256958	Q9Y6L6.181	A0A024RAU7.41	UPI0000043BED	-	-	1	-	-	-	2023-07-14	-	-	ENST00000256958.3:c.728-53C>T	-	-	-	-	-	-	-
	12:21196894:C:G	chr12:21196894	G	ENSG00000134538	ENST00000256958	Transcript	intron_variant	-	-	-	-	-	rs1217914891	MODIFIER	-	1	-	SNV	SLCO1B1	HGNC	HGNC:10959	protein_coding	YES	NM_006446.5	-	1	P1	CCDS8685.1	ENSP00000256958	Q9Y6L6.181	A0A024RAU7.41	UPI0000043BED	-	-	1	-	-	-	2023-07-14	-	-	ENST00000256958.3:c.728-52C>G	-	-	-	-	-	-	-
	12:21196895:T:C	chr12:21196895	C	ENSG00000134538	ENST00000256958	Transcript	intron_variant	-	-	-	-	-	rs1276378952	MODIFIER	-	1	-	SNV	SLCO1B1	HGNC	HGNC:10959	protein_coding	YES	NM_006446.5	-	1	P1	CCDS8685.1	ENSP00000256958	Q9Y6L6.181	A0A024RAU7.41	UPI0000043BED	-	-	1	-	-	-	2023-07-14	-	-	ENST00000256958.3:c.728-51T>C	-	-	-	-	-	-	-
	12:21196897:T:C	chr12:21196897	C	ENSG00000134538	ENST00000256958	Transcript	intron_variant	-	-	-	-	-	rs371810558	MODIFIER	-	1	-	SNV	SLCO1B1	HGNC	HGNC:10959	protein_coding	YES	NM_006446.5	-	1	P1	CCDS8685.1	ENSP00000256958	Q9Y6L6.181	A0A024RAU7.41	UPI0000043BED	-	-	1	-	-	-	2023-07-14	-	-	ENST00000256958.3:c.728-49T>C	-	-	-	-	-	-	-
	12:21196901:A:G	chr12:21196901	G	ENSG00000134538	ENST00000256958	Transcript	intron_variant	-	-	-	-	-	-	MODIFIER	-	1	-	SNV	SLCO1B1	HGNC	HGNC:10959	protein_coding	YES	NM_006446.5	-	1	P1	CCDS8685.1	ENSP00000256958	Q9Y6L6.181	A0A024RAU7.41	UPI0000043BED	-	-	1	-	-	-	2023-07-14	-	-	ENST00000256958.3:c.728-45A>G	-	-	-	-	-	-	-
	12:21196906:A:C	chr12:21196906	C	ENSG00000134538	ENST00000256958	Transcript	intron_variant	-	-	-	-	-	-	MODIFIER	-	1	-	SNV	SLCO1B1	HGNC	HGNC:10959	protein_coding	YES	NM_006446.5	-	1	P1	CCDS8685.1	ENSP00000256958	Q9Y6L6.181	A0A024RAU7.41	UPI0000043BED	-	-	1	-	-	-	2023-07-14	-	-	ENST00000256958.3:c.728-40A>C	-	-	-	-	-	-	-
	12:21196906:A:G	chr12:21196906	G	ENSG00000134538	ENST00000256958	Transcript	intron_variant	-	-	-	-	-	rs1279855981	MODIFIER	-	1	-	SNV	SLCO1B1	HGNC	HGNC:10959	protein_coding	YES	NM_006446.5	-	1	P1	CCDS8685.1	ENSP00000256958	Q9Y6L6.181	A0A024RAU7.41	UPI0000043BED	-	-	1	-	-	-	2023-07-14	-	-	ENST00000256958.3:c.728-40A>G	-	-	-	-	-	-	-
	12:21196910:T:C	chr12:21196910	C	ENSG00000134538	ENST00000256958	Transcript	intron_variant	-	-	-	-	-	-	MODIFIER	-	1	-	SNV	SLCO1B1	HGNC	HGNC:10959	protein_coding	YES	NM_006446.5	-	1	P1	CCDS8685.1	ENSP00000256958	Q9Y6L6.181	A0A024RAU7.41	UPI0000043BED	-	-	1	-	-	-	2023-07-14	-	-	ENST00000256958.3:c.728-36T>C	-	-	-	-	-	-	-
	12:21196912:A:G	chr12:21196912	G	ENSG00000134538	ENST00000256958	Transcript	intron_variant	-	-	-	-	-	rs1164043758	MODIFIER	-	1	-	SNV	SLCO1B1	HGNC	HGNC:10959	protein_coding	YES	NM_006446.5	-	1	P1	CCDS8685.1	ENSP00000256958	Q9Y6L6.181	A0A024RAU7.41	UPI0000043BED	-	-	1	-	-	-	2023-07-14	-	-	ENST00000256958.3:c.728-34A>G	-	-	-	-	-	-	-
	12:21196928:TATAA:T	chr12:21196929-21196932	-	ENSG00000134538	ENST00000256958	Transcript	intron_variant	-	-	-	-	-	rs150936610	MODIFIER	-	1	-	deletion	SLCO1B1	HGNC	HGNC:10959	protein_coding	YES	NM_006446.5	-	1	P1	CCDS8685.1	ENSP00000256958	Q9Y6L6.181	A0A024RAU7.41	UPI0000043BED	-	-	1	-	-	-	2023-07-14	-	-	ENST00000256958.3:c.728-17_728-14del	-	-	0.0162	0.0272	0.0014	0	0
	12:21196929:A:G	chr12:21196929	G	ENSG00000134538	ENST00000256958	Transcript	intron_variant	-	-	-	-	-	rs776720872	MODIFIER	-	1	-	SNV	SLCO1B1	HGNC	HGNC:10959	protein_coding	YES	NM_006446.5	-	1	P1	CCDS8685.1	ENSP00000256958	Q9Y6L6.181	A0A024RAU7.41	UPI0000043BED	-	-	1	-	-	-	2023-07-14	-	-	ENST00000256958.3:c.728-17A>G	-	-	-	-	-	-	-
	12:21196932:ATTAT:A	chr12:21196933-21196936	-	ENSG00000134538	ENST00000256958	Transcript	intron_variant	-	-	-	-	-	rs768924486	MODIFIER	-	1	-	deletion	SLCO1B1	HGNC	HGNC:10959	protein_coding	YES	NM_006446.5	-	1	P1	CCDS8685.1	ENSP00000256958	Q9Y6L6.181	A0A024RAU7.41	UPI0000043BED	-	-	1	-	-	-	2023-07-14	-	-	ENST00000256958.3:c.728-8_728-5del	-	-	-	-	-	-	-
	12:21196934:T:A	chr12:21196934	A	ENSG00000134538	ENST00000256958	Transcript	intron_variant	-	-	-	-	-	-	MODIFIER	-	1	-	SNV	SLCO1B1	HGNC	HGNC:10959	protein_coding	YES	NM_006446.5	-	1	P1	CCDS8685.1	ENSP00000256958	Q9Y6L6.181	A0A024RAU7.41	UPI0000043BED	-	-	1	-	-	-	2023-07-14	-	-	ENST00000256958.3:c.728-12T>A	-	-	-	-	-	-	-
	12:21196939:A:G	chr12:21196939	G	ENSG00000134538	ENST00000256958	Transcript	splice_region_variant,intron_variant	-	-	-	-	-	-	LOW	-	1	-	SNV	SLCO1B1	HGNC	HGNC:10959	protein_coding	YES	NM_006446.5	-	1	P1	CCDS8685.1	ENSP00000256958	Q9Y6L6.181	A0A024RAU7.41	UPI0000043BED	-	-	1	-	-	-	2023-07-14	-	-	ENST00000256958.3:c.728-7A>G	-	-	-	-	-	-	-
	12:21196943:T:C	chr12:21196943	C	ENSG00000134538	ENST00000256958	Transcript	splice_region_variant,intron_variant	-	-	-	-	-	-	LOW	-	1	-	SNV	SLCO1B1	HGNC	HGNC:10959	protein_coding	YES	NM_006446.5	-	1	P1	CCDS8685.1	ENSP00000256958	Q9Y6L6.181	A0A024RAU7.41	UPI0000043BED	-	-	1	-	-	-	2023-07-14	-	-	ENST00000256958.3:c.728-3T>C	-	-	-	-	-	-	-
	12:21196945:G:C	chr12:21196945	C	ENSG00000134538	ENST00000256958	Transcript	splice_acceptor_variant	-	-	-	-	-	-	HIGH	-	1	-	SNV	SLCO1B1	HGNC	HGNC:10959	protein_coding	YES	NM_006446.5	-	1	P1	CCDS8685.1	ENSP00000256958	Q9Y6L6.181	A0A024RAU7.41	UPI0000043BED	-	-	1	-	-	-	2023-07-14	-	-	ENST00000256958.3:c.728-1G>C	-	-	-	-	-	-	-
	12:21196946:G:A	chr12:21196946	A	ENSG00000134538	ENST00000256958	Transcript	missense_variant,splice_region_variant	832	728	243	S/N	aGc/aAc	rs558073276	MODERATE	-	1	-	SNV	SLCO1B1	HGNC	HGNC:10959	protein_coding	YES	NM_006446.5	-	1	P1	CCDS8685.1	ENSP00000256958	Q9Y6L6.181	A0A024RAU7.41	UPI0000043BED	-	-	1	tolerated(0.23)	benign(0.033)	2023-08-15	-	PROSITE_profiles:PS50850,PANTHER:PTHR11388,PANTHER:PTHR11388:SF82,Pfam:PF03137,TIGRFAM:TIGR00805,Superfamily:SSF103473	-	ENST00000256958.3:c.728G>A	ENSP00000256958.2:p.Ser243Asn	-	0.0004	0.0008	0.0014	0	0
	12:21196946:G:T	chr12:21196946	T	ENSG00000134538	ENST00000256958	Transcript	missense_variant,splice_region_variant	832	728	243	S/I	aGc/aTc	-	MODERATE	-	1	-	SNV	SLCO1B1	HGNC	HGNC:10959	protein_coding	YES	NM_006446.5	-	1	P1	CCDS8685.1	ENSP00000256958	Q9Y6L6.181	A0A024RAU7.41	UPI0000043BED	-	-	1	deleterious(0)	possibly_damaging(0.808)	2023-08-15	-	PROSITE_profiles:PS50850,PANTHER:PTHR11388,PANTHER:PTHR11388:SF82,Pfam:PF03137,TIGRFAM:TIGR00805,Superfamily:SSF103473	-	ENST00000256958.3:c.728G>T	ENSP00000256958.2:p.Ser243Ile	-	-	-	-	-	-
	12:21196947:C:T	chr12:21196947	T	ENSG00000134538	ENST00000256958	Transcript	splice_region_variant,synonymous_variant	833	729	243	S	agC/agT	rs1330152204	LOW	-	1	-	SNV	SLCO1B1	HGNC	HGNC:10959	protein_coding	YES	NM_006446.5	-	1	P1	CCDS8685.1	ENSP00000256958	Q9Y6L6.181	A0A024RAU7.41	UPI0000043BED	-	-	1	-	-	2023-08-15	-	PROSITE_profiles:PS50850,PANTHER:PTHR11388,PANTHER:PTHR11388:SF82,Pfam:PF03137,TIGRFAM:TIGR00805,Superfamily:SSF103473	-	ENST00000256958.3:c.729C>T	ENSP00000256958.2:p.Ser243%3D	-	-	-	-	-	-
	12:21196951:A:G	chr12:21196951	G	ENSG00000134538	ENST00000256958	Transcript	missense_variant	837	733	245	I/V	Atc/Gtc	rs11045852	MODERATE	-	1	-	SNV	SLCO1B1	HGNC	HGNC:10959	protein_coding	YES	NM_006446.5	-	1	P1	CCDS8685.1	ENSP00000256958	Q9Y6L6.181	A0A024RAU7.41	UPI0000043BED	-	-	1	tolerated(0.1)	benign(0.029)	2023-08-15	-	PROSITE_profiles:PS50850,PANTHER:PTHR11388,PANTHER:PTHR11388:SF82,Pfam:PF03137,TIGRFAM:TIGR00805,Superfamily:SSF103473	-	ENST00000256958.3:c.733A>G	ENSP00000256958.2:p.Ile245Val	-	0.016	0.0272	0.0014	0	0
	12:21196952:T:G	chr12:21196952	G	ENSG00000134538	ENST00000256958	Transcript	missense_variant	838	734	245	I/S	aTc/aGc	rs879810743	MODERATE	-	1	-	SNV	SLCO1B1	HGNC	HGNC:10959	protein_coding	YES	NM_006446.5	-	1	P1	CCDS8685.1	ENSP00000256958	Q9Y6L6.181	A0A024RAU7.41	UPI0000043BED	-	-	1	deleterious(0)	possibly_damaging(0.87)	2023-08-15	-	PROSITE_profiles:PS50850,PANTHER:PTHR11388,PANTHER:PTHR11388:SF82,Pfam:PF03137,TIGRFAM:TIGR00805,Superfamily:SSF103473	-	ENST00000256958.3:c.734T>G	ENSP00000256958.2:p.Ile245Ser	-	-	-	-	-	-
	12:21196953:C:T	chr12:21196953	T	ENSG00000134538	ENST00000256958	Transcript	synonymous_variant	839	735	245	I	atC/atT	-	LOW	-	1	-	SNV	SLCO1B1	HGNC	HGNC:10959	protein_coding	YES	NM_006446.5	-	1	P1	CCDS8685.1	ENSP00000256958	Q9Y6L6.181	A0A024RAU7.41	UPI0000043BED	-	-	1	-	-	2023-08-15	-	PROSITE_profiles:PS50850,PANTHER:PTHR11388,PANTHER:PTHR11388:SF82,Pfam:PF03137,TIGRFAM:TIGR00805,Superfamily:SSF103473	-	ENST00000256958.3:c.735C>T	ENSP00000256958.2:p.Ile245%3D	-	-	-	-	-	-
	12:21196954:A:G	chr12:21196954	G	ENSG00000134538	ENST00000256958	Transcript	missense_variant	840	736	246	R/G	Agg/Ggg	-	MODERATE	-	1	-	SNV	SLCO1B1	HGNC	HGNC:10959	protein_coding	YES	NM_006446.5	-	1	P1	CCDS8685.1	ENSP00000256958	Q9Y6L6.181	A0A024RAU7.41	UPI0000043BED	-	-	1	deleterious(0.04)	benign(0.102)	2023-08-15	-	PROSITE_profiles:PS50850,PANTHER:PTHR11388,PANTHER:PTHR11388:SF82,Pfam:PF03137,TIGRFAM:TIGR00805,Superfamily:SSF103473	-	ENST00000256958.3:c.736A>G	ENSP00000256958.2:p.Arg246Gly	-	-	-	-	-	-
	12:21196954:AG:A	chr12:21196955	-	ENSG00000134538	ENST00000256958	Transcript	frameshift_variant	841	737	246	R/X	aGg/ag	-	HIGH	-	1	-	deletion	SLCO1B1	HGNC	HGNC:10959	protein_coding	YES	NM_006446.5	-	1	P1	CCDS8685.1	ENSP00000256958	Q9Y6L6.181	A0A024RAU7.41	UPI0000043BED	-	-	1	-	-	2023-08-15	-	PROSITE_profiles:PS50850,PANTHER:PTHR11388,PANTHER:PTHR11388:SF82,Pfam:PF03137,TIGRFAM:TIGR00805,Superfamily:SSF103473	-	ENST00000256958.3:c.738del	ENSP00000256958.2:p.Ile247Ter	1	-	-	-	-	-
	12:21196956:G:C	chr12:21196956	C	ENSG00000134538	ENST00000256958	Transcript	missense_variant	842	738	246	R/S	agG/agC	COSV57011956	MODERATE	-	1	-	SNV	SLCO1B1	HGNC	HGNC:10959	protein_coding	YES	NM_006446.5	-	1	P1	CCDS8685.1	ENSP00000256958	Q9Y6L6.181	A0A024RAU7.41	UPI0000043BED	-	-	1	tolerated(0.11)	benign(0.017)	2023-08-15	-	PROSITE_profiles:PS50850,PANTHER:PTHR11388,PANTHER:PTHR11388:SF82,Pfam:PF03137,TIGRFAM:TIGR00805,Superfamily:SSF103473	-	ENST00000256958.3:c.738G>C	ENSP00000256958.2:p.Arg246Ser	-	-	-	-	-	-
	12:21196956:GA:G	chr12:21196957	-	ENSG00000134538	ENST00000256958	Transcript	frameshift_variant	843	739	247	I/X	Ata/ta	COSV57007178	HIGH	-	1	-	deletion	SLCO1B1	HGNC	HGNC:10959	protein_coding	YES	NM_006446.5	-	1	P1	CCDS8685.1	ENSP00000256958	Q9Y6L6.181	A0A024RAU7.41	UPI0000043BED	-	-	1	-	-	2023-08-15	-	PROSITE_profiles:PS50850,PANTHER:PTHR11388,PANTHER:PTHR11388:SF82,Pfam:PF03137,TIGRFAM:TIGR00805,Superfamily:SSF103473	-	ENST00000256958.3:c.739del	ENSP00000256958.2:p.Ile247Ter	-	-	-	-	-	-
	12:21196958:T:C	chr12:21196958	C	ENSG00000134538	ENST00000256958	Transcript	missense_variant	844	740	247	I/T	aTa/aCa	rs762634768	MODERATE	-	1	-	SNV	SLCO1B1	HGNC	HGNC:10959	protein_coding	YES	NM_006446.5	-	1	P1	CCDS8685.1	ENSP00000256958	Q9Y6L6.181	A0A024RAU7.41	UPI0000043BED	-	-	1	deleterious(0)	probably_damaging(0.986)	2023-08-15	-	PROSITE_profiles:PS50850,PANTHER:PTHR11388,PANTHER:PTHR11388:SF82,Pfam:PF03137,TIGRFAM:TIGR00805,Superfamily:SSF103473	-	ENST00000256958.3:c.740T>C	ENSP00000256958.2:p.Ile247Thr	-	-	-	-	-	-
	12:21196960:A:G	chr12:21196960	G	ENSG00000134538	ENST00000256958	Transcript	missense_variant	846	742	248	T/A	Act/Gct	COSV99918410	MODERATE	-	1	-	SNV	SLCO1B1	HGNC	HGNC:10959	protein_coding	YES	NM_006446.5	-	1	P1	CCDS8685.1	ENSP00000256958	Q9Y6L6.181	A0A024RAU7.41	UPI0000043BED	-	-	1	deleterious(0)	possibly_damaging(0.893)	2023-08-15	-	PROSITE_profiles:PS50850,PANTHER:PTHR11388,PANTHER:PTHR11388:SF82,Pfam:PF03137,TIGRFAM:TIGR00805,Superfamily:SSF103473	-	ENST00000256958.3:c.742A>G	ENSP00000256958.2:p.Thr248Ala	-	-	-	-	-	-
	12:21196961:C:T	chr12:21196961	T	ENSG00000134538	ENST00000256958	Transcript	missense_variant	847	743	248	T/I	aCt/aTt	rs774398133	MODERATE	-	1	-	SNV	SLCO1B1	HGNC	HGNC:10959	protein_coding	YES	NM_006446.5	-	1	P1	CCDS8685.1	ENSP00000256958	Q9Y6L6.181	A0A024RAU7.41	UPI0000043BED	-	-	1	deleterious(0.02)	probably_damaging(0.996)	2023-08-15	-	PROSITE_profiles:PS50850,PANTHER:PTHR11388,PANTHER:PTHR11388:SF82,Pfam:PF03137,TIGRFAM:TIGR00805,Superfamily:SSF103473	-	ENST00000256958.3:c.743C>T	ENSP00000256958.2:p.Thr248Ile	-	-	-	-	-	-
	12:21196963:C:T	chr12:21196963	T	ENSG00000134538	ENST00000256958	Transcript	missense_variant	849	745	249	P/S	Cct/Tct	-	MODERATE	-	1	-	SNV	SLCO1B1	HGNC	HGNC:10959	protein_coding	YES	NM_006446.5	-	1	P1	CCDS8685.1	ENSP00000256958	Q9Y6L6.181	A0A024RAU7.41	UPI0000043BED	-	-	1	deleterious(0.02)	possibly_damaging(0.817)	2023-08-15	-	PROSITE_profiles:PS50850,PANTHER:PTHR11388,PANTHER:PTHR11388:SF82,Pfam:PF03137,TIGRFAM:TIGR00805,Superfamily:SSF103473	-	ENST00000256958.3:c.745C>T	ENSP00000256958.2:p.Pro249Ser	-	-	-	-	-	-
	12:21196965:T:C	chr12:21196965	C	ENSG00000134538	ENST00000256958	Transcript	synonymous_variant	851	747	249	P	ccT/ccC	-	LOW	-	1	-	SNV	SLCO1B1	HGNC	HGNC:10959	protein_coding	YES	NM_006446.5	-	1	P1	CCDS8685.1	ENSP00000256958	Q9Y6L6.181	A0A024RAU7.41	UPI0000043BED	-	-	1	-	-	2023-08-15	-	PROSITE_profiles:PS50850,PANTHER:PTHR11388,PANTHER:PTHR11388:SF82,Pfam:PF03137,TIGRFAM:TIGR00805,Superfamily:SSF103473	-	ENST00000256958.3:c.747T>C	ENSP00000256958.2:p.Pro249%3D	-	-	-	-	-	-
	12:21196973:C:A	chr12:21196973	A	ENSG00000134538	ENST00000256958	Transcript	missense_variant	859	755	252	S/Y	tCt/tAt	rs1247336816,COSV99919044	MODERATE	-	1	-	SNV	SLCO1B1	HGNC	HGNC:10959	protein_coding	YES	NM_006446.5	-	1	P1	CCDS8685.1	ENSP00000256958	Q9Y6L6.181	A0A024RAU7.41	UPI0000043BED	-	-	1	deleterious(0)	possibly_damaging(0.481)	2023-08-15	-	PROSITE_profiles:PS50850,PANTHER:PTHR11388,PANTHER:PTHR11388:SF82,Pfam:PF03137,TIGRFAM:TIGR00805,Superfamily:SSF103473	-	ENST00000256958.3:c.755C>A	ENSP00000256958.2:p.Ser252Tyr	-	-	-	-	-	-
	12:21196973:C:T	chr12:21196973	T	ENSG00000134538	ENST00000256958	Transcript	missense_variant	859	755	252	S/F	tCt/tTt	COSV99919044	MODERATE	-	1	-	SNV	SLCO1B1	HGNC	HGNC:10959	protein_coding	YES	NM_006446.5	-	1	P1	CCDS8685.1	ENSP00000256958	Q9Y6L6.181	A0A024RAU7.41	UPI0000043BED	-	-	1	deleterious(0)	possibly_damaging(0.845)	2023-08-15	-	PROSITE_profiles:PS50850,PANTHER:PTHR11388,PANTHER:PTHR11388:SF82,Pfam:PF03137,TIGRFAM:TIGR00805,Superfamily:SSF103473	-	ENST00000256958.3:c.755C>T	ENSP00000256958.2:p.Ser252Phe	-	-	-	-	-	-
	12:21196975:C:T	chr12:21196975	T	ENSG00000134538	ENST00000256958	Transcript	stop_gained	861	757	253	R/*	Cga/Tga	rs183501729,CM120773,COSV57009920,COSV57015002	HIGH	-	1	-	SNV	SLCO1B1	HGNC	HGNC:10959	protein_coding	YES	NM_006446.5	-	1	P1	CCDS8685.1	ENSP00000256958	Q9Y6L6.181	A0A024RAU7.41	UPI0000043BED	-	-	1	-	-	2023-08-15	-	PROSITE_profiles:PS50850,PANTHER:PTHR11388,PANTHER:PTHR11388:SF82,Pfam:PF03137,TIGRFAM:TIGR00805,Superfamily:SSF103473	-	ENST00000256958.3:c.757C>T	ENSP00000256958.2:p.Arg253Ter	-	0.0004	0	0	0.002	0
	12:21196976:G:A	chr12:21196976	A	ENSG00000134538	ENST00000256958	Transcript	missense_variant	862	758	253	R/Q	cGa/cAa	rs11045853,COSV57009118,COSV57013720	MODERATE	-	1	-	SNV	SLCO1B1	HGNC	HGNC:10959	protein_coding	YES	NM_006446.5	-	1	P1	CCDS8685.1	ENSP00000256958	Q9Y6L6.181	A0A024RAU7.41	UPI0000043BED	-	-	1	deleterious(0.02)	probably_damaging(0.924)	2023-08-15	-	PROSITE_profiles:PS50850,PANTHER:PTHR11388,PANTHER:PTHR11388:SF82,Pfam:PF03137,TIGRFAM:TIGR00805,Superfamily:SSF103473	-	ENST00000256958.3:c.758G>A	ENSP00000256958.2:p.Arg253Gln	-	0.0006	0.0023	0	0	0
	12:21196976:G:C	chr12:21196976	C	ENSG00000134538	ENST00000256958	Transcript	missense_variant	862	758	253	R/P	cGa/cCa	COSV57009118,COSV57013720	MODERATE	-	1	-	SNV	SLCO1B1	HGNC	HGNC:10959	protein_coding	YES	NM_006446.5	-	1	P1	CCDS8685.1	ENSP00000256958	Q9Y6L6.181	A0A024RAU7.41	UPI0000043BED	-	-	1	deleterious(0)	probably_damaging(0.999)	2023-08-15	-	PROSITE_profiles:PS50850,PANTHER:PTHR11388,PANTHER:PTHR11388:SF82,Pfam:PF03137,TIGRFAM:TIGR00805,Superfamily:SSF103473	-	ENST00000256958.3:c.758G>C	ENSP00000256958.2:p.Arg253Pro	-	-	-	-	-	-
	12:21196976:G:T	chr12:21196976	T	ENSG00000134538	ENST00000256958	Transcript	missense_variant	862	758	253	R/L	cGa/cTa	COSV57009118,COSV57013720	MODERATE	-	1	-	SNV	SLCO1B1	HGNC	HGNC:10959	protein_coding	YES	NM_006446.5	-	1	P1	CCDS8685.1	ENSP00000256958	Q9Y6L6.181	A0A024RAU7.41	UPI0000043BED	-	-	1	deleterious(0)	probably_damaging(0.982)	2023-08-15	-	PROSITE_profiles:PS50850,PANTHER:PTHR11388,PANTHER:PTHR11388:SF82,Pfam:PF03137,TIGRFAM:TIGR00805,Superfamily:SSF103473	-	ENST00000256958.3:c.758G>T	ENSP00000256958.2:p.Arg253Leu	-	-	-	-	-	-
	12:21196978:T:A	chr12:21196978	A	ENSG00000134538	ENST00000256958	Transcript	missense_variant	864	760	254	W/R	Tgg/Agg	-	MODERATE	-	1	-	SNV	SLCO1B1	HGNC	HGNC:10959	protein_coding	YES	NM_006446.5	-	1	P1	CCDS8685.1	ENSP00000256958	Q9Y6L6.181	A0A024RAU7.41	UPI0000043BED	-	-	1	deleterious(0)	probably_damaging(1)	2023-08-15	-	PROSITE_profiles:PS50850,PANTHER:PTHR11388,PANTHER:PTHR11388:SF82,Pfam:PF03137,TIGRFAM:TIGR00805,Superfamily:SSF103473	-	ENST00000256958.3:c.760T>A	ENSP00000256958.2:p.Trp254Arg	-	-	-	-	-	-
	12:21196984:G:A	chr12:21196984	A	ENSG00000134538	ENST00000256958	Transcript	missense_variant	870	766	256	G/R	Gga/Aga	rs754247932,COSV57011695	MODERATE	-	1	-	SNV	SLCO1B1	HGNC	HGNC:10959	protein_coding	YES	NM_006446.5	-	1	P1	CCDS8685.1	ENSP00000256958	Q9Y6L6.181	A0A024RAU7.41	UPI0000043BED	-	-	1	deleterious(0)	probably_damaging(1)	2023-08-15	-	PROSITE_profiles:PS50850,PANTHER:PTHR11388,PANTHER:PTHR11388:SF82,Pfam:PF03137,TIGRFAM:TIGR00805,Superfamily:SSF103473	-	ENST00000256958.3:c.766G>A	ENSP00000256958.2:p.Gly256Arg	-	-	-	-	-	-
	12:21196988:C:T	chr12:21196988	T	ENSG00000134538	ENST00000256958	Transcript	missense_variant	874	770	257	A/V	gCt/gTt	-	MODERATE	-	1	-	SNV	SLCO1B1	HGNC	HGNC:10959	protein_coding	YES	NM_006446.5	-	1	P1	CCDS8685.1	ENSP00000256958	Q9Y6L6.181	A0A024RAU7.41	UPI0000043BED	-	-	1	deleterious(0)	probably_damaging(1)	2023-08-15	-	Transmembrane_helices:TMhelix,PROSITE_profiles:PS50850,PANTHER:PTHR11388,PANTHER:PTHR11388:SF82,Pfam:PF03137,TIGRFAM:TIGR00805,Superfamily:SSF103473	-	ENST00000256958.3:c.770C>T	ENSP00000256958.2:p.Ala257Val	-	-	-	-	-	-
	12:21196992:G:A	chr12:21196992	A	ENSG00000134538	ENST00000256958	Transcript	stop_gained	878	774	258	W/*	tgG/tgA	rs1159011720	HIGH	-	1	-	SNV	SLCO1B1	HGNC	HGNC:10959	protein_coding	YES	NM_006446.5	-	1	P1	CCDS8685.1	ENSP00000256958	Q9Y6L6.181	A0A024RAU7.41	UPI0000043BED	-	-	1	-	-	2023-08-15	-	Transmembrane_helices:TMhelix,PROSITE_profiles:PS50850,PANTHER:PTHR11388,PANTHER:PTHR11388:SF82,Pfam:PF03137,TIGRFAM:TIGR00805,Superfamily:SSF103473	-	ENST00000256958.3:c.774G>A	ENSP00000256958.2:p.Trp258Ter	-	-	-	-	-	-
	12:21196994:G:T	chr12:21196994	T	ENSG00000134538	ENST00000256958	Transcript	missense_variant	880	776	259	W/L	tGg/tTg	-	MODERATE	-	1	-	SNV	SLCO1B1	HGNC	HGNC:10959	protein_coding	YES	NM_006446.5	-	1	P1	CCDS8685.1	ENSP00000256958	Q9Y6L6.181	A0A024RAU7.41	UPI0000043BED	-	-	1	deleterious(0)	probably_damaging(1)	2023-08-15	-	Transmembrane_helices:TMhelix,PROSITE_profiles:PS50850,PANTHER:PTHR11388,PANTHER:PTHR11388:SF82,Pfam:PF03137,TIGRFAM:TIGR00805,Superfamily:SSF103473	-	ENST00000256958.3:c.776G>T	ENSP00000256958.2:p.Trp259Leu	-	-	-	-	-	-
	12:21196996:C:T	chr12:21196996	T	ENSG00000134538	ENST00000256958	Transcript	missense_variant	882	778	260	L/F	Ctt/Ttt	rs756955511	MODERATE	-	1	-	SNV	SLCO1B1	HGNC	HGNC:10959	protein_coding	YES	NM_006446.5	-	1	P1	CCDS8685.1	ENSP00000256958	Q9Y6L6.181	A0A024RAU7.41	UPI0000043BED	-	-	1	deleterious(0)	probably_damaging(0.919)	2023-08-15	-	Transmembrane_helices:TMhelix,PROSITE_profiles:PS50850,PANTHER:PTHR11388,PANTHER:PTHR11388:SF82,Pfam:PF03137,TIGRFAM:TIGR00805,Superfamily:SSF103473	-	ENST00000256958.3:c.778C>T	ENSP00000256958.2:p.Leu260Phe	-	-	-	-	-	-
	12:21197002:T:C	chr12:21197002	C	ENSG00000134538	ENST00000256958	Transcript	missense_variant	888	784	262	F/L	Ttc/Ctc	-	MODERATE	-	1	-	SNV	SLCO1B1	HGNC	HGNC:10959	protein_coding	YES	NM_006446.5	-	1	P1	CCDS8685.1	ENSP00000256958	Q9Y6L6.181	A0A024RAU7.41	UPI0000043BED	-	-	1	deleterious(0.02)	possibly_damaging(0.734)	2023-08-15	-	Transmembrane_helices:TMhelix,PROSITE_profiles:PS50850,PANTHER:PTHR11388,PANTHER:PTHR11388:SF82,Pfam:PF03137,TIGRFAM:TIGR00805,Superfamily:SSF103473	-	ENST00000256958.3:c.784T>C	ENSP00000256958.2:p.Phe262Leu	-	-	-	-	-	-
	12:21197004:C:T	chr12:21197004	T	ENSG00000134538	ENST00000256958	Transcript	synonymous_variant	890	786	262	F	ttC/ttT	rs780914697,COSV57008301	LOW	-	1	-	SNV	SLCO1B1	HGNC	HGNC:10959	protein_coding	YES	NM_006446.5	-	1	P1	CCDS8685.1	ENSP00000256958	Q9Y6L6.181	A0A024RAU7.41	UPI0000043BED	-	-	1	-	-	2023-08-15	-	Transmembrane_helices:TMhelix,PROSITE_profiles:PS50850,PANTHER:PTHR11388,PANTHER:PTHR11388:SF82,Pfam:PF03137,TIGRFAM:TIGR00805,Superfamily:SSF103473	-	ENST00000256958.3:c.786C>T	ENSP00000256958.2:p.Phe262%3D	-	-	-	-	-	-
	12:21197006:T:C	chr12:21197006	C	ENSG00000134538	ENST00000256958	Transcript	missense_variant	892	788	263	L/P	cTt/cCt	rs1298675209	MODERATE	-	1	-	SNV	SLCO1B1	HGNC	HGNC:10959	protein_coding	YES	NM_006446.5	-	1	P1	CCDS8685.1	ENSP00000256958	Q9Y6L6.181	A0A024RAU7.41	UPI0000043BED	-	-	1	deleterious(0)	probably_damaging(0.954)	2023-08-15	-	Transmembrane_helices:TMhelix,PROSITE_profiles:PS50850,PANTHER:PTHR11388,PANTHER:PTHR11388:SF82,Pfam:PF03137,TIGRFAM:TIGR00805,Superfamily:SSF103473	-	ENST00000256958.3:c.788T>C	ENSP00000256958.2:p.Leu263Pro	-	-	-	-	-	-
	12:21197010:G:A	chr12:21197010	A	ENSG00000134538	ENST00000256958	Transcript	synonymous_variant	896	792	264	V	gtG/gtA	rs769900367	LOW	-	1	-	SNV	SLCO1B1	HGNC	HGNC:10959	protein_coding	YES	NM_006446.5	-	1	P1	CCDS8685.1	ENSP00000256958	Q9Y6L6.181	A0A024RAU7.41	UPI0000043BED	-	-	1	-	-	2023-08-15	-	Transmembrane_helices:TMhelix,PROSITE_profiles:PS50850,PANTHER:PTHR11388,PANTHER:PTHR11388:SF82,Pfam:PF03137,TIGRFAM:TIGR00805,Superfamily:SSF103473	-	ENST00000256958.3:c.792G>A	ENSP00000256958.2:p.Val264%3D	-	-	-	-	-	-
	12:21197012:C:G	chr12:21197012	G	ENSG00000134538	ENST00000256958	Transcript	missense_variant	898	794	265	S/C	tCt/tGt	rs1220572787,COSV57015008	MODERATE	-	1	-	SNV	SLCO1B1	HGNC	HGNC:10959	protein_coding	YES	NM_006446.5	-	1	P1	CCDS8685.1	ENSP00000256958	Q9Y6L6.181	A0A024RAU7.41	UPI0000043BED	-	-	1	deleterious(0.04)	benign(0.02)	2023-08-15	-	Transmembrane_helices:TMhelix,PROSITE_profiles:PS50850,PANTHER:PTHR11388,PANTHER:PTHR11388:SF82,Pfam:PF03137,TIGRFAM:TIGR00805,Superfamily:SSF103473	-	ENST00000256958.3:c.794C>G	ENSP00000256958.2:p.Ser265Cys	-	-	-	-	-	-
	12:21197019:A:G	chr12:21197019	G	ENSG00000134538	ENST00000256958	Transcript	synonymous_variant	905	801	267	L	ctA/ctG	-	LOW	-	1	-	SNV	SLCO1B1	HGNC	HGNC:10959	protein_coding	YES	NM_006446.5	-	1	P1	CCDS8685.1	ENSP00000256958	Q9Y6L6.181	A0A024RAU7.41	UPI0000043BED	-	-	1	-	-	2023-08-15	-	Low_complexity_(Seg):seg,Transmembrane_helices:TMhelix,PROSITE_profiles:PS50850,PANTHER:PTHR11388,PANTHER:PTHR11388:SF82,Pfam:PF03137,TIGRFAM:TIGR00805,Superfamily:SSF103473	-	ENST00000256958.3:c.801A>G	ENSP00000256958.2:p.Leu267%3D	-	-	-	-	-	-
	12:21197026:A:C	chr12:21197026	C	ENSG00000134538	ENST00000256958	Transcript	missense_variant	912	808	270	I/L	Att/Ctt	rs201438350	MODERATE	-	1	-	SNV	SLCO1B1	HGNC	HGNC:10959	protein_coding	YES	NM_006446.5	-	1	P1	CCDS8685.1	ENSP00000256958	Q9Y6L6.181	A0A024RAU7.41	UPI0000043BED	-	-	1	tolerated(0.33)	benign(0.013)	2023-08-15	-	Low_complexity_(Seg):seg,Transmembrane_helices:TMhelix,PROSITE_profiles:PS50850,PANTHER:PTHR11388,PANTHER:PTHR11388:SF82,Pfam:PF03137,TIGRFAM:TIGR00805,Superfamily:SSF103473	-	ENST00000256958.3:c.808A>C	ENSP00000256958.2:p.Ile270Leu	-	-	-	-	-	-
	12:21197026:A:G	chr12:21197026	G	ENSG00000134538	ENST00000256958	Transcript	missense_variant	912	808	270	I/V	Att/Gtt	-	MODERATE	-	1	-	SNV	SLCO1B1	HGNC	HGNC:10959	protein_coding	YES	NM_006446.5	-	1	P1	CCDS8685.1	ENSP00000256958	Q9Y6L6.181	A0A024RAU7.41	UPI0000043BED	-	-	1	tolerated(0.09)	benign(0.05)	2023-08-15	-	Low_complexity_(Seg):seg,Transmembrane_helices:TMhelix,PROSITE_profiles:PS50850,PANTHER:PTHR11388,PANTHER:PTHR11388:SF82,Pfam:PF03137,TIGRFAM:TIGR00805,Superfamily:SSF103473	-	ENST00000256958.3:c.808A>G	ENSP00000256958.2:p.Ile270Val	-	-	-	-	-	-
	12:21197034:T:C	chr12:21197034	C	ENSG00000134538	ENST00000256958	Transcript	synonymous_variant	920	816	272	S	tcT/tcC	COSV99919378	LOW	-	1	-	SNV	SLCO1B1	HGNC	HGNC:10959	protein_coding	YES	NM_006446.5	-	1	P1	CCDS8685.1	ENSP00000256958	Q9Y6L6.181	A0A024RAU7.41	UPI0000043BED	-	-	1	-	-	2023-08-15	-	Low_complexity_(Seg):seg,Transmembrane_helices:TMhelix,PROSITE_profiles:PS50850,PANTHER:PTHR11388,PANTHER:PTHR11388:SF82,Pfam:PF03137,TIGRFAM:TIGR00805,Superfamily:SSF103473	-	ENST00000256958.3:c.816T>C	ENSP00000256958.2:p.Ser272%3D	-	-	-	-	-	-
	12:21197036:C:T	chr12:21197036	T	ENSG00000134538	ENST00000256958	Transcript	missense_variant	922	818	273	S/F	tCc/tTc	COSV57008104	MODERATE	-	1	-	SNV	SLCO1B1	HGNC	HGNC:10959	protein_coding	YES	NM_006446.5	-	1	P1	CCDS8685.1	ENSP00000256958	Q9Y6L6.181	A0A024RAU7.41	UPI0000043BED	-	-	1	deleterious(0)	probably_damaging(0.99)	2023-08-15	-	Low_complexity_(Seg):seg,Transmembrane_helices:TMhelix,PROSITE_profiles:PS50850,PANTHER:PTHR11388,PANTHER:PTHR11388:SF82,Pfam:PF03137,TIGRFAM:TIGR00805,Superfamily:SSF103473	-	ENST00000256958.3:c.818C>T	ENSP00000256958.2:p.Ser273Phe	-	-	-	-	-	-
	12:21197037:C:T	chr12:21197037	T	ENSG00000134538	ENST00000256958	Transcript	synonymous_variant	923	819	273	S	tcC/tcT	-	LOW	-	1	-	SNV	SLCO1B1	HGNC	HGNC:10959	protein_coding	YES	NM_006446.5	-	1	P1	CCDS8685.1	ENSP00000256958	Q9Y6L6.181	A0A024RAU7.41	UPI0000043BED	-	-	1	-	-	2023-08-15	-	Low_complexity_(Seg):seg,Transmembrane_helices:TMhelix,PROSITE_profiles:PS50850,PANTHER:PTHR11388,PANTHER:PTHR11388:SF82,Pfam:PF03137,TIGRFAM:TIGR00805,Superfamily:SSF103473	-	ENST00000256958.3:c.819C>T	ENSP00000256958.2:p.Ser273%3D	-	-	-	-	-	-
	12:21197040:A:G	chr12:21197040	G	ENSG00000134538	ENST00000256958	Transcript	missense_variant	926	822	274	I/M	atA/atG	rs192911820	MODERATE	-	1	-	SNV	SLCO1B1	HGNC	HGNC:10959	protein_coding	YES	NM_006446.5	-	1	P1	CCDS8685.1	ENSP00000256958	Q9Y6L6.181	A0A024RAU7.41	UPI0000043BED	-	-	1	deleterious(0.01)	possibly_damaging(0.847)	2023-08-15	-	Low_complexity_(Seg):seg,Transmembrane_helices:TMhelix,PROSITE_profiles:PS50850,PANTHER:PTHR11388,PANTHER:PTHR11388:SF82,Pfam:PF03137,TIGRFAM:TIGR00805,Superfamily:SSF103473	-	ENST00000256958.3:c.822A>G	ENSP00000256958.2:p.Ile274Met	-	0.0002	0.0008	0	0	0
	12:21197041:C:A	chr12:21197041	A	ENSG00000134538	ENST00000256958	Transcript	missense_variant	927	823	275	P/T	Cca/Aca	rs760725262	MODERATE	-	1	-	SNV	SLCO1B1	HGNC	HGNC:10959	protein_coding	YES	NM_006446.5	-	1	P1	CCDS8685.1	ENSP00000256958	Q9Y6L6.181	A0A024RAU7.41	UPI0000043BED	-	-	1	deleterious(0)	probably_damaging(1)	2023-08-15	-	Low_complexity_(Seg):seg,Transmembrane_helices:TMhelix,PROSITE_profiles:PS50850,PANTHER:PTHR11388,PANTHER:PTHR11388:SF82,Pfam:PF03137,TIGRFAM:TIGR00805,Superfamily:SSF103473	-	ENST00000256958.3:c.823C>A	ENSP00000256958.2:p.Pro275Thr	-	-	-	-	-	-
	12:21197042:C:G	chr12:21197042	G	ENSG00000134538	ENST00000256958	Transcript	missense_variant	928	824	275	P/R	cCa/cGa	COSV57012175,COSV57015832	MODERATE	-	1	-	SNV	SLCO1B1	HGNC	HGNC:10959	protein_coding	YES	NM_006446.5	-	1	P1	CCDS8685.1	ENSP00000256958	Q9Y6L6.181	A0A024RAU7.41	UPI0000043BED	-	-	1	deleterious(0)	probably_damaging(1)	2023-08-15	-	Low_complexity_(Seg):seg,Transmembrane_helices:TMhelix,PROSITE_profiles:PS50850,PANTHER:PTHR11388,PANTHER:PTHR11388:SF82,Pfam:PF03137,TIGRFAM:TIGR00805,Superfamily:SSF103473	-	ENST00000256958.3:c.824C>G	ENSP00000256958.2:p.Pro275Arg	-	-	-	-	-	-
	12:21197045:T:C	chr12:21197045	C	ENSG00000134538	ENST00000256958	Transcript	missense_variant	931	827	276	F/S	tTc/tCc	-	MODERATE	-	1	-	SNV	SLCO1B1	HGNC	HGNC:10959	protein_coding	YES	NM_006446.5	-	1	P1	CCDS8685.1	ENSP00000256958	Q9Y6L6.181	A0A024RAU7.41	UPI0000043BED	-	-	1	deleterious(0)	probably_damaging(0.998)	2023-08-15	-	Low_complexity_(Seg):seg,Transmembrane_helices:TMhelix,PROSITE_profiles:PS50850,PANTHER:PTHR11388,PANTHER:PTHR11388:SF82,Pfam:PF03137,TIGRFAM:TIGR00805,Superfamily:SSF103473	-	ENST00000256958.3:c.827T>C	ENSP00000256958.2:p.Phe276Ser	-	-	-	-	-	-
	12:21197045:T:G	chr12:21197045	G	ENSG00000134538	ENST00000256958	Transcript	missense_variant	931	827	276	F/C	tTc/tGc	rs754227814	MODERATE	-	1	-	SNV	SLCO1B1	HGNC	HGNC:10959	protein_coding	YES	NM_006446.5	-	1	P1	CCDS8685.1	ENSP00000256958	Q9Y6L6.181	A0A024RAU7.41	UPI0000043BED	-	-	1	deleterious(0)	probably_damaging(0.999)	2023-08-15	-	Low_complexity_(Seg):seg,Transmembrane_helices:TMhelix,PROSITE_profiles:PS50850,PANTHER:PTHR11388,PANTHER:PTHR11388:SF82,Pfam:PF03137,TIGRFAM:TIGR00805,Superfamily:SSF103473	-	ENST00000256958.3:c.827T>G	ENSP00000256958.2:p.Phe276Cys	-	-	-	-	-	-
	12:21197046:C:A	chr12:21197046	A	ENSG00000134538	ENST00000256958	Transcript	missense_variant	932	828	276	F/L	ttC/ttA	COSV104563455,COSV99918806	MODERATE	-	1	-	SNV	SLCO1B1	HGNC	HGNC:10959	protein_coding	YES	NM_006446.5	-	1	P1	CCDS8685.1	ENSP00000256958	Q9Y6L6.181	A0A024RAU7.41	UPI0000043BED	-	-	1	deleterious(0.02)	possibly_damaging(0.766)	2023-08-15	-	Low_complexity_(Seg):seg,Transmembrane_helices:TMhelix,PROSITE_profiles:PS50850,PANTHER:PTHR11388,PANTHER:PTHR11388:SF82,Pfam:PF03137,TIGRFAM:TIGR00805,Superfamily:SSF103473	-	ENST00000256958.3:c.828C>A	ENSP00000256958.2:p.Phe276Leu	-	-	-	-	-	-
	12:21197047:T:C	chr12:21197047	C	ENSG00000134538	ENST00000256958	Transcript	missense_variant	933	829	277	F/L	Ttt/Ctt	-	MODERATE	-	1	-	SNV	SLCO1B1	HGNC	HGNC:10959	protein_coding	YES	NM_006446.5	-	1	P1	CCDS8685.1	ENSP00000256958	Q9Y6L6.181	A0A024RAU7.41	UPI0000043BED	-	-	1	deleterious(0.03)	benign(0.38)	2023-08-15	-	Low_complexity_(Seg):seg,Transmembrane_helices:TMhelix,PROSITE_profiles:PS50850,PANTHER:PTHR11388,PANTHER:PTHR11388:SF82,Pfam:PF03137,TIGRFAM:TIGR00805,Superfamily:SSF103473	-	ENST00000256958.3:c.829T>C	ENSP00000256958.2:p.Phe277Leu	-	-	-	-	-	-
	12:21197048:T:C	chr12:21197048	C	ENSG00000134538	ENST00000256958	Transcript	missense_variant	934	830	277	F/S	tTt/tCt	rs1012575169	MODERATE	-	1	-	SNV	SLCO1B1	HGNC	HGNC:10959	protein_coding	YES	NM_006446.5	-	1	P1	CCDS8685.1	ENSP00000256958	Q9Y6L6.181	A0A024RAU7.41	UPI0000043BED	-	-	1	deleterious(0)	probably_damaging(0.985)	2023-08-15	-	Low_complexity_(Seg):seg,Transmembrane_helices:TMhelix,PROSITE_profiles:PS50850,PANTHER:PTHR11388,PANTHER:PTHR11388:SF82,Pfam:PF03137,TIGRFAM:TIGR00805,Superfamily:SSF103473	-	ENST00000256958.3:c.830T>C	ENSP00000256958.2:p.Phe277Ser	-	-	-	-	-	-
	12:21197049:T:C	chr12:21197049	C	ENSG00000134538	ENST00000256958	Transcript	synonymous_variant	935	831	277	F	ttT/ttC	rs1333993584	LOW	-	1	-	SNV	SLCO1B1	HGNC	HGNC:10959	protein_coding	YES	NM_006446.5	-	1	P1	CCDS8685.1	ENSP00000256958	Q9Y6L6.181	A0A024RAU7.41	UPI0000043BED	-	-	1	-	-	2023-08-15	-	Low_complexity_(Seg):seg,Transmembrane_helices:TMhelix,PROSITE_profiles:PS50850,PANTHER:PTHR11388,PANTHER:PTHR11388:SF82,Pfam:PF03137,TIGRFAM:TIGR00805,Superfamily:SSF103473	-	ENST00000256958.3:c.831T>C	ENSP00000256958.2:p.Phe277%3D	-	-	-	-	-	-
	12:21197052:C:G	chr12:21197052	G	ENSG00000134538	ENST00000256958	Transcript	missense_variant	938	834	278	F/L	ttC/ttG	rs182303784	MODERATE	-	1	-	SNV	SLCO1B1	HGNC	HGNC:10959	protein_coding	YES	NM_006446.5	-	1	P1	CCDS8685.1	ENSP00000256958	Q9Y6L6.181	A0A024RAU7.41	UPI0000043BED	-	-	1	deleterious(0)	probably_damaging(0.992)	2023-08-15	-	Low_complexity_(Seg):seg,Transmembrane_helices:TMhelix,PROSITE_profiles:PS50850,PANTHER:PTHR11388,PANTHER:PTHR11388:SF82,Pfam:PF03137,TIGRFAM:TIGR00805,Superfamily:SSF103473	-	ENST00000256958.3:c.834C>G	ENSP00000256958.2:p.Phe278Leu	-	0.0002	0	0	0.001	0
	12:21197056:C:A	chr12:21197056	A	ENSG00000134538	ENST00000256958	Transcript	missense_variant	942	838	280	P/T	Ccc/Acc	-	MODERATE	-	1	-	SNV	SLCO1B1	HGNC	HGNC:10959	protein_coding	YES	NM_006446.5	-	1	P1	CCDS8685.1	ENSP00000256958	Q9Y6L6.181	A0A024RAU7.41	UPI0000043BED	-	-	1	deleterious(0)	probably_damaging(0.998)	2023-08-15	-	Low_complexity_(Seg):seg,PROSITE_profiles:PS50850,PANTHER:PTHR11388,PANTHER:PTHR11388:SF82,Pfam:PF03137,TIGRFAM:TIGR00805,Superfamily:SSF103473	-	ENST00000256958.3:c.838C>A	ENSP00000256958.2:p.Pro280Thr	-	-	-	-	-	-
	12:21197056:C:G	chr12:21197056	G	ENSG00000134538	ENST00000256958	Transcript	missense_variant	942	838	280	P/A	Ccc/Gcc	-	MODERATE	-	1	-	SNV	SLCO1B1	HGNC	HGNC:10959	protein_coding	YES	NM_006446.5	-	1	P1	CCDS8685.1	ENSP00000256958	Q9Y6L6.181	A0A024RAU7.41	UPI0000043BED	-	-	1	deleterious(0)	probably_damaging(0.996)	2023-08-15	-	Low_complexity_(Seg):seg,PROSITE_profiles:PS50850,PANTHER:PTHR11388,PANTHER:PTHR11388:SF82,Pfam:PF03137,TIGRFAM:TIGR00805,Superfamily:SSF103473	-	ENST00000256958.3:c.838C>G	ENSP00000256958.2:p.Pro280Ala	-	-	-	-	-	-
	12:21197056:C:T	chr12:21197056	T	ENSG00000134538	ENST00000256958	Transcript	missense_variant	942	838	280	P/S	Ccc/Tcc	-	MODERATE	-	1	-	SNV	SLCO1B1	HGNC	HGNC:10959	protein_coding	YES	NM_006446.5	-	1	P1	CCDS8685.1	ENSP00000256958	Q9Y6L6.181	A0A024RAU7.41	UPI0000043BED	-	-	1	deleterious(0.03)	probably_damaging(0.993)	2023-08-15	-	Low_complexity_(Seg):seg,PROSITE_profiles:PS50850,PANTHER:PTHR11388,PANTHER:PTHR11388:SF82,Pfam:PF03137,TIGRFAM:TIGR00805,Superfamily:SSF103473	-	ENST00000256958.3:c.838C>T	ENSP00000256958.2:p.Pro280Ser	-	-	-	-	-	-
	12:21197059:C:G	chr12:21197059	G	ENSG00000134538	ENST00000256958	Transcript	missense_variant	945	841	281	Q/E	Caa/Gaa	rs757008718	MODERATE	-	1	-	SNV	SLCO1B1	HGNC	HGNC:10959	protein_coding	YES	NM_006446.5	-	1	P1	CCDS8685.1	ENSP00000256958	Q9Y6L6.181	A0A024RAU7.41	UPI0000043BED	-	-	1	deleterious(0.04)	benign(0.026)	2023-08-15	-	PROSITE_profiles:PS50850,PANTHER:PTHR11388,PANTHER:PTHR11388:SF82,Pfam:PF03137,TIGRFAM:TIGR00805,Superfamily:SSF103473	-	ENST00000256958.3:c.841C>G	ENSP00000256958.2:p.Gln281Glu	-	-	-	-	-	-
	12:21197068:A:C	chr12:21197068	C	ENSG00000134538	ENST00000256958	Transcript	missense_variant	954	850	284	N/H	Aat/Cat	rs779059572	MODERATE	-	1	-	SNV	SLCO1B1	HGNC	HGNC:10959	protein_coding	YES	NM_006446.5	-	1	P1	CCDS8685.1	ENSP00000256958	Q9Y6L6.181	A0A024RAU7.41	UPI0000043BED	-	-	1	tolerated(0.08)	possibly_damaging(0.852)	2023-08-15	-	PROSITE_profiles:PS50850,PANTHER:PTHR11388,PANTHER:PTHR11388:SF82,Pfam:PF03137,TIGRFAM:TIGR00805,Superfamily:SSF103473	-	ENST00000256958.3:c.850A>C	ENSP00000256958.2:p.Asn284His	-	-	-	-	-	-
	12:21197075:C:T	chr12:21197075	T	ENSG00000134538	ENST00000256958	Transcript	missense_variant	961	857	286	P/L	cCa/cTa	COSV57016924	MODERATE	-	1	-	SNV	SLCO1B1	HGNC	HGNC:10959	protein_coding	YES	NM_006446.5	-	1	P1	CCDS8685.1	ENSP00000256958	Q9Y6L6.181	A0A024RAU7.41	UPI0000043BED	-	-	1	deleterious(0)	benign(0.081)	2023-08-15	-	PROSITE_profiles:PS50850,PANTHER:PTHR11388,PANTHER:PTHR11388:SF82,Pfam:PF03137,TIGRFAM:TIGR00805,Superfamily:SSF103473	-	ENST00000256958.3:c.857C>T	ENSP00000256958.2:p.Pro286Leu	-	-	-	-	-	-
	12:21197079:A:C	chr12:21197079	C	ENSG00000134538	ENST00000256958	Transcript	missense_variant	965	861	287	Q/H	caA/caC	-	MODERATE	-	1	-	SNV	SLCO1B1	HGNC	HGNC:10959	protein_coding	YES	NM_006446.5	-	1	P1	CCDS8685.1	ENSP00000256958	Q9Y6L6.181	A0A024RAU7.41	UPI0000043BED	-	-	1	deleterious(0.01)	benign(0.216)	2023-08-15	-	PROSITE_profiles:PS50850,PANTHER:PTHR11388,PANTHER:PTHR11388:SF82,Pfam:PF03137,TIGRFAM:TIGR00805,Superfamily:SSF103473	-	ENST00000256958.3:c.861A>C	ENSP00000256958.2:p.Gln287His	-	-	-	-	-	-
	12:21197079:AAAAG:A	chr12:21197080-21197083	-	ENSG00000134538	ENST00000256958	Transcript	frameshift_variant	966-969	862-865	288-289	KE/X	AAAGaa/aa	rs1437911256	HIGH	-	1	-	deletion	SLCO1B1	HGNC	HGNC:10959	protein_coding	YES	NM_006446.5	-	1	P1	CCDS8685.1	ENSP00000256958	Q9Y6L6.181	A0A024RAU7.41	UPI0000043BED	-	-	1	-	-	2023-08-15	-	PROSITE_profiles:PS50850,PANTHER:PTHR11388,PANTHER:PTHR11388:SF82,Pfam:PF03137,TIGRFAM:TIGR00805,Superfamily:SSF103473	-	ENST00000256958.3:c.869_872del	ENSP00000256958.2:p.Arg290LysfsTer21	7	-	-	-	-	-
	12:21197082:A:G	chr12:21197082	G	ENSG00000134538	ENST00000256958	Transcript	synonymous_variant	968	864	288	K	aaA/aaG	rs749124299	LOW	-	1	-	SNV	SLCO1B1	HGNC	HGNC:10959	protein_coding	YES	NM_006446.5	-	1	P1	CCDS8685.1	ENSP00000256958	Q9Y6L6.181	A0A024RAU7.41	UPI0000043BED	-	-	1	-	-	2023-08-15	-	PROSITE_profiles:PS50850,PANTHER:PTHR11388,PANTHER:PTHR11388:SF82,Pfam:PF03137,TIGRFAM:TIGR00805,Superfamily:SSF103473	-	ENST00000256958.3:c.864A>G	ENSP00000256958.2:p.Lys288%3D	-	-	-	-	-	-
	12:21197083:G:A	chr12:21197083	A	ENSG00000134538	ENST00000256958	Transcript	missense_variant	969	865	289	E/K	Gaa/Aaa	COSV57012186	MODERATE	-	1	-	SNV	SLCO1B1	HGNC	HGNC:10959	protein_coding	YES	NM_006446.5	-	1	P1	CCDS8685.1	ENSP00000256958	Q9Y6L6.181	A0A024RAU7.41	UPI0000043BED	-	-	1	tolerated(0.2)	benign(0.14)	2023-08-15	-	PROSITE_profiles:PS50850,PANTHER:PTHR11388,PANTHER:PTHR11388:SF82,Pfam:PF03137,TIGRFAM:TIGR00805,Superfamily:SSF103473	-	ENST00000256958.3:c.865G>A	ENSP00000256958.2:p.Glu289Lys	-	-	-	-	-	-
	12:21197083:GA:G	chr12:21197084	-	ENSG00000134538	ENST00000256958	Transcript	frameshift_variant	970	866	289	E/X	gAa/ga	-	HIGH	-	1	-	deletion	SLCO1B1	HGNC	HGNC:10959	protein_coding	YES	NM_006446.5	-	1	P1	CCDS8685.1	ENSP00000256958	Q9Y6L6.181	A0A024RAU7.41	UPI0000043BED	-	-	1	-	-	2023-08-15	-	PROSITE_profiles:PS50850,PANTHER:PTHR11388,PANTHER:PTHR11388:SF82,Pfam:PF03137,TIGRFAM:TIGR00805,Superfamily:SSF103473	-	ENST00000256958.3:c.868del	ENSP00000256958.2:p.Arg290GlufsTer22	2	-	-	-	-	-
	12:21197087:G:A	chr12:21197087	A	ENSG00000134538	ENST00000256958	Transcript	missense_variant	973	869	290	R/K	aGa/aAa	rs768628268,COSV57008782,COSV57019357	MODERATE	-	1	-	SNV	SLCO1B1	HGNC	HGNC:10959	protein_coding	YES	NM_006446.5	-	1	P1	CCDS8685.1	ENSP00000256958	Q9Y6L6.181	A0A024RAU7.41	UPI0000043BED	-	-	1	tolerated(0.24)	benign(0.021)	2023-08-15	-	PROSITE_profiles:PS50850,PANTHER:PTHR11388,PANTHER:PTHR11388:SF82,Pfam:PF03137,TIGRFAM:TIGR00805,Superfamily:SSF103473	-	ENST00000256958.3:c.869G>A	ENSP00000256958.2:p.Arg290Lys	-	-	-	-	-	-
	12:21197087:G:T	chr12:21197087	T	ENSG00000134538	ENST00000256958	Transcript	missense_variant	973	869	290	R/I	aGa/aTa	COSV57008782,COSV57019357	MODERATE	-	1	-	SNV	SLCO1B1	HGNC	HGNC:10959	protein_coding	YES	NM_006446.5	-	1	P1	CCDS8685.1	ENSP00000256958	Q9Y6L6.181	A0A024RAU7.41	UPI0000043BED	-	-	1	deleterious(0)	benign(0.296)	2023-08-15	-	PROSITE_profiles:PS50850,PANTHER:PTHR11388,PANTHER:PTHR11388:SF82,Pfam:PF03137,TIGRFAM:TIGR00805,Superfamily:SSF103473	-	ENST00000256958.3:c.869G>T	ENSP00000256958.2:p.Arg290Ile	-	-	-	-	-	-
	12:21197092:G:T	chr12:21197092	T	ENSG00000134538	ENST00000256958	Transcript	missense_variant	978	874	292	A/S	Gct/Tct	COSV57012729	MODERATE	-	1	-	SNV	SLCO1B1	HGNC	HGNC:10959	protein_coding	YES	NM_006446.5	-	1	P1	CCDS8685.1	ENSP00000256958	Q9Y6L6.181	A0A024RAU7.41	UPI0000043BED	-	-	1	tolerated(0.74)	benign(0.012)	2023-08-15	-	PROSITE_profiles:PS50850,PANTHER:PTHR11388,PANTHER:PTHR11388:SF82,Pfam:PF03137,TIGRFAM:TIGR00805,Superfamily:SSF103473	-	ENST00000256958.3:c.874G>T	ENSP00000256958.2:p.Ala292Ser	-	-	-	-	-	-
	12:21197096:C:T	chr12:21197096	T	ENSG00000134538	ENST00000256958	Transcript	missense_variant	982	878	293	S/L	tCa/tTa	rs1242019427	MODERATE	-	1	-	SNV	SLCO1B1	HGNC	HGNC:10959	protein_coding	YES	NM_006446.5	-	1	P1	CCDS8685.1	ENSP00000256958	Q9Y6L6.181	A0A024RAU7.41	UPI0000043BED	-	-	1	deleterious(0.04)	benign(0.02)	2023-08-15	-	PROSITE_profiles:PS50850,PANTHER:PTHR11388,PANTHER:PTHR11388:SF82,Pfam:PF03137,TIGRFAM:TIGR00805,Superfamily:SSF103473	-	ENST00000256958.3:c.878C>T	ENSP00000256958.2:p.Ser293Leu	-	-	-	-	-	-
	12:21197100:G:A	chr12:21197100	A	ENSG00000134538	ENST00000256958	Transcript	synonymous_variant	986	882	294	L	ctG/ctA	rs11045854	LOW	-	1	-	SNV	SLCO1B1	HGNC	HGNC:10959	protein_coding	YES	NM_006446.5	-	1	P1	CCDS8685.1	ENSP00000256958	Q9Y6L6.181	A0A024RAU7.41	UPI0000043BED	-	-	1	-	-	2023-08-15	-	PROSITE_profiles:PS50850,PANTHER:PTHR11388,PANTHER:PTHR11388:SF82,Pfam:PF03137,TIGRFAM:TIGR00805,Superfamily:SSF103473	-	ENST00000256958.3:c.882G>A	ENSP00000256958.2:p.Leu294%3D	-	0.016	0.0272	0.0014	0	0
[truncated: 917 more rows]
[truncated: 42 more columns]

[truncated: 2 more sheets: Table S11, Table S12]
